# Supplementary material for: Transcriptional profiling of putative human epithelial stem cells
Source: PubMed Central journal article supplement (PMC2536675; doi:10.1186/1471-2164-9-359), 2008-07-30
Supplement: 1471-2164-9-359-S1.pdf [file 1471-2164-9-359-S1.pdf]

| Probe Set | Exp. 1 | Exp. 2 | Definition / Product | symbol |
|-----------|--------|--------|----------------------|--------|
|           | Signal | Signal |                      |        |
|           | Log    | Log    |                      |        |
|           | Ratio  | Ratio  |                      |        |

#### WNT signaling

|             |      |      |                                                                             |        |
|-------------|------|------|-----------------------------------------------------------------------------|--------|
| 203697_at   | -3.9 | -3.2 | Human Fritz mRNA                                                            | FRZB   |
| 203698_s_at | -2.8 | -2.7 | frizzled-related protein                                                    | FRZB   |
| 204451_at   |      | -1.3 | frizzled (Drosophila) homolog 1                                             | FZD1   |
| 218665_at   |      | -1.7 | frizzled (Drosophila) homolog 4                                             | FZD4   |
| 203706_s_at | -1.1 | -1.5 | frizzled (Drosophila) homolog 7                                             | FZD7   |
| 204712_at   | -6.6 | -3.8 | Wnt inhibitory factor-1                                                     | WIF-1  |
| 221455_s_at |      | 3.8  | wingless-type MMTV integration site family, member 3                        | WNT3   |
| 208606_s_at |      | 3.6  | wingless-type MMTV integration site family, member 4                        | WNT4   |
| 204602_at   | -1.3 | -1.9 | dickkopf (Xenopus laevis) homolog 1                                         | DKK1   |
| 219908_at   | -1.7 |      | dickkopf (Xenopus laevis) homolog 2                                         | DKK2   |
| 202196_s_at |      | 2.5  | dickkopf (Xenopus laevis) homolog 3                                         | DKK3   |
| 213730_x_at |      | -1   | transcription factor 3 (E2A immunoglobulin enhancer binding factors E12E47) | TCF3   |
| 209153_s_at |      | -1.3 | transcription factor 3 (E2A immunoglobulin enhancer binding factors E12E47) | TCF3   |
| 221016_s_at | -1.5 |      | HMG-box transcription factor TCF-3                                          | TCF-3  |
| 205255_x_at | -1.1 |      | transcription factor 7 (T-cell specific, HMG-box)                           | TCF7   |
| 212761_at   |      | -1.2 | transcription factor 7-like 2 (T-cell specific, HMG-box)                    | TCF7L2 |
| 203221_at   | -1   |      | transducin-like enhancer of split 1, homolog of Drosophila E(sp1)           | TLE1   |
| 210691_s_at | 1.1  |      | Homo sapiens PNAS-107 mRNA, complete cds.                                   | CACYBP |
| 212596_s_at |      | 1.3  | high-mobility group protein 2-like 1                                        | HMG2L1 |
| 201278_at   | -1.9 |      | disabled (Drosophila) homolog 2 (mitogen-responsive phosphoprotein)         | DAB2   |
| 210835_s_at |      | -1   | ribeye                                                                      | CTBP2  |

#### WNT signaling targets

##### INDUCED TARGETS AMONG mRNAs ENRICHED IN ALPHA6+/MHCI+ CELLS

|             |     |     |                                                                                                   |        |
|-------------|-----|-----|---------------------------------------------------------------------------------------------------|--------|
| 202431_s_at |     | 1   | v-myc avian myelocytomatosis viral oncogene homolog                                               | MYC    |
| 208711_s_at |     | 1.3 | cyclin D1 (PRAD1: parathyroid adenomatosis 1)                                                     | CND1   |
| 201465_s_at |     | 1   | v-jun avian sarcoma virus 17 oncogene homolog                                                     | JUN    |
| 200951_s_at |     | 3.3 | cyclin D2                                                                                         | CND2   |
| 204170_s_at | 1.1 |     | CDC28 protein kinase 2                                                                            | CKS2   |
| 214710_s_at | 2.2 | 1.8 | cyclin B1                                                                                         | CNNB1  |
| 212022_s_at |     | 2   | antigen identified by monoclonal antibody Ki-67                                                   | MKI67  |
| 202095_s_at |     | 2.5 | baculoviral IAP repeat-containing 5 (survivin)                                                    | BIRC5  |
| 213201_s_at |     | 3.5 | troponin T1, skeletal, slow                                                                       | TNNT1  |
| 206393_at   | 1.4 |     | troponin I, skeletal, fast                                                                        | TNNI2  |
| 201152_s_at |     | 1.4 | muscleblind (Drosophila)-like                                                                     | MBNL   |
| 212143_s_at | 1.1 |     | insulin-like growth factor binding protein 3                                                      | IGFBP3 |
| 203554_x_at | 1.1 | 1   | pituitary tumor-transforming 1                                                                    | PTTG1  |
| 201983_s_at |     | 1.2 | epidermal growth factor receptor (avian erythroblastic leukemia viral (v-erb-b) oncogene homolog) | EGFR   |
| 201325_s_at |     | 2.1 | epithelial membrane protein 1                                                                     | EMP1   |
| 209257_s_at |     | 2.5 | chondroitin sulfate proteoglycan 6 (bamacan)                                                      | CSPG6  |
| 209258_s_at |     | 2.8 | chondroitin sulfate proteoglycan 6 (bamacan)                                                      | CSPG6  |
| 201615_x_at |     | 1.2 | caldesmon 1                                                                                       | CALD1  |
| 209212_s_at |     | 1.8 | mRNA for transcription factor BTEB2, complete cds                                                 | BTEB2  |
| 208893_s_at |     | 3.5 | clone MGC:12852, mRNA                                                                             | DUSP6  |
| 209189_at   |     | 2.2 | v-fos FBJ murine osteosarcoma viral oncogene homolog                                              | FOS    |
| 200760_s_at |     | 1.2 | vitamin A responsive; cytoskeleton related                                                        | JWA    |
| 211015_s_at |     | 1.4 | heat shock protein 70 (hsp70) mRNA                                                                | hsp70  |
| 202554_s_at |     | 1.3 | glutathione S-transferase M3 (brain)                                                              | GSTM3  |
| 201820_at   | 1   |     | keratin 5 (epidermolysis bullosa simplex, Dowling-MearaKobnerWeber-Cockayne types)                | KRT5   |
| 209060_x_at |     | 1.3 | nuclear receptor coactivator 3                                                                    | NCOA3  |
| 209061_at   |     | 1   | nuclear receptor coactivator 3                                                                    | NCOA3  |
| 210809_s_at |     | 1.1 | osteoblast specific factor 2 [osf-2]                                                              |        |
| 202071_at   |     | 1   | syndecan 4 (amphiglycan, ryudocan)                                                                | SDC4   |
| 212420_at   |     | 1.6 | E74-like factor 1 (ets domain transcription factor)                                               | ELF1   |
| 200943_at   |     | 1   | high-mobility group (nonhistone chromosomal) protein 14                                           | HMG14  |
| 200598_s_at |     | 2.3 | tumor rejection antigen (gp96) 1                                                                  | TRA1   |
| 209024_s_at | 1.2 | 1   | NS1-associated protein 1                                                                          | NSAP1  |
| 201014_s_at | 1.4 | 2   | multifunctional polypeptide similar to SAICARSynthetase and AIR carboxylase                       | ADE2H1 |
| 202532_s_at |     | 1.1 | dihydrofolate reductase                                                                           | DHFR   |
| 203968_s_at | 1.6 |     | CDC6 (cell division cycle 6, S. cerevisiae) homolog                                               | CDC6   |
| 222037_at   | 1.2 | 3.4 | minichromosome maintenance deficient (S. cerevisiae) 4                                            | MCM4   |
| 212141_at   | 1   |     | minichromosome maintenance deficient (S. cerevisiae) 4                                            | MCM4   |
| 211953_s_at |     | 1.2 | karyopherin (importin) beta 3                                                                     | KPNB3  |

##### REPRESSED TARGETS AMONG mRNAs ENRICHED IN ALPHA6+/MHCI- CELLS

|             |      |      |                                                                                                                                        |        |
|-------------|------|------|----------------------------------------------------------------------------------------------------------------------------------------|--------|
| 206891_at   |      | -1.1 | skeletal muscle specific actinin, alpha 3                                                                                              | ACTN3  |
| 210517_s_at | -1.1 | -1   | Homo sapiens mRNA for gravin, complete cds.                                                                                            | AKAP12 |
| 213275_x_at | -1.4 | -1   | cathepsin B                                                                                                                            | CTSB   |
| 213274_s_at | -1.1 |      | cathepsin B                                                                                                                            | CTSB   |
| 206214_at   | -3.1 |      | phospholipase A2, group VII (platelet-activating factor acetylhydrolase, plasma)                                                       | PLA2G7 |
| 204682_at   |      | -1   | latent transforming growth factor beta binding protein 2                                                                               | LTPB2  |
| 201278_at   | -1.9 |      | disabled (Drosophila) homolog 2 (mitogen-responsive phosphoprotein)                                                                    | DAB2   |
| 207345_at   | -2   | -2.3 | follistatin, transcript variant FST317                                                                                                 | FST    |
| 204948_s_at | -1.1 | -1.9 | follistatin, transcript variant FST344                                                                                                 | FST    |
| 222043_at   |      | -1.2 | clusterin (complement lysis inhibitor, SP-40,40, sulfated glycoprotein 2, testosterone-repressed prostate message 2, apolipoprotein J) | CLU    |

|             |      |                                                                             |        |
|-------------|------|-----------------------------------------------------------------------------|--------|
| 213730_x_at | -1   | transcription factor 3 (E2A immunoglobulin enhancer binding factors E12E47) | TCF3   |
| 209153_s_at | -1.3 | transcription factor 3 (E2A immunoglobulin enhancer binding factors E12E47) | TCF3   |
| 221016_s_at | -1.5 | HMG-box transcription factor TCF-3                                          | TCF-3  |
| 212732_at   | -1.7 | maternally expressed 3                                                      | MEG3   |
| 212226_s_at | -1.2 | phosphatidic acid phosphatase type 2B                                       | PPAP2B |
| 212230_at   | -1.6 | phosphatidic acid phosphatase type 2B                                       | PPAP2B |
| 203549_s_at | -1.3 | lipoprotein lipase                                                          | LPL    |
| 203706_s_at | -1.1 | frizzled (Drosophila) homolog 7                                             | FZD7   |
| 209291_at   | -1   | inhibitor of DNA binding 4, dominant negative helix-loop-helix protein      | ID4    |
| 213348_at   | -1.1 | cyclin-dependent kinase inhibitor 1C (p57, Kip2)                            | CDKN1C |
| 213183_s_at | -1.5 | cyclin-dependent kinase inhibitor 1C (p57, Kip2)                            | CDKN1C |

#### TGF/BMP Signalling

|             |      |                                                                                         |         |
|-------------|------|-----------------------------------------------------------------------------------------|---------|
| 205396_at   | -1.3 | MAD (mothers against decapentaplegic, Drosophila) homolog 3                             | MADH3   |
| 207069_s_at | -1.6 | MAD (mothers against decapentaplegic, Drosophila) homolog 6                             | MADH6   |
| 208446_s_at | -1.5 | MAD (mothers against decapentaplegic, Drosophila) homolog interacting protein, receptor | MADHIP  |
|             |      | activation anchor, transcript variant 2                                                 |         |
| 208310_s_at | 1.1  | follistatin-like 1                                                                      | FSTL1   |
| 207345_at   | -2   | follistatin, transcript variant FST317                                                  | FST     |
| 204948_s_at | -1.1 | follistatin, transcript variant FST344                                                  | FST     |
| 205289_at   | 1.3  | bone morphogenetic protein 2                                                            | BMP2    |
| 205430_at   | -5.1 | bone morphogenetic protein 5                                                            | BMP5    |
| 205431_s_at | -2.4 | bone morphogenetic protein 5                                                            | BMP5    |
| 207865_s_at | -2   | bone morphogenetic protein 8 (osteogenic protein 2)                                     | BMP8    |
| 208292_at   | -1.2 | bone morphogenetic protein 10                                                           | BMP10   |
| 221332_at   | -1.3 | bone morphogenetic protein 15                                                           | BMP15   |
| 202526_at   | -1.5 | homozygous deletion target in pancreatic carcinoma                                      | DPC4    |
| 205187_at   | 1.9  | SMAD5                                                                                   |         |
| 205209_at   | 1.1  | activin A receptor, type IB                                                             | ACVR1B  |
| 207687_at   | -1.4 | inhibin, beta C                                                                         | INHBC   |
| 207688_s_at | -1.8 | inhibin, beta C                                                                         | INHBC   |
| 208944_at   | 1.3  | TGF-beta1IR alpha                                                                       | TGFBFR2 |
| 216917_s_at | -3.8 | H.sapiens mRNA for SCP1 protein.                                                        | SCP1    |

#### TGF/BMP-Induced Factors

##### INDUCED TARGETS AMONG mRNAs ENRICHED IN ALPHA6+/MHCI- CELLS

|             |      |      |                                                                                                                                        |         |
|-------------|------|------|----------------------------------------------------------------------------------------------------------------------------------------|---------|
| 203697_at   | -3.9 | -3.2 | Human Fritz mRNA                                                                                                                       | FRZB    |
| 203698_s_at | -2.8 | -2.7 | frizzled-related protein                                                                                                               | FRZB    |
| 211980_at   | -1.9 | -1.2 | collagen, type IV, alpha 1                                                                                                             | COL4A1  |
| 212070_at   | -1.2 |      | G protein-coupled receptor 56                                                                                                          | GPR56   |
| 201416_at   |      | -1.2 | SRY (sex determining region Y)-box 4                                                                                                   | SOX4    |
| 222043_at   |      | -1.2 | clusterin (complement lysis inhibitor, SP-40,40, sulfated glycoprotein 2, testosterone-repressed prostate message 2, apolipoprotein J) | CLU     |
| 213446_s_at | -1.3 |      | IQ motif containing GTPase activating protein 1                                                                                        | IQGAP1  |
| 218574_s_at | -1.3 | -2.7 | LIM and cysteine-rich domains 1                                                                                                        | LMCD1   |
| 221489_s_at | -1.2 |      | sprouty (Drosophila) homolog 4                                                                                                         | SPRY4   |
| 201124_at   | -1.1 |      | integrin, beta 5                                                                                                                       | ITGB5   |
| 201125_s_at |      | -1   | integrin, beta 5                                                                                                                       | ITGB5   |
| 202729_s_at |      | -1.1 | latent transforming growth factor beta binding protein 1                                                                               | LTBP1   |
| 204682_at   |      | -1   | latent transforming growth factor beta binding protein 2                                                                               | LTBP2   |
| 200696_s_at | -1   |      | gelsolin (amyloidosis, Finnish type)                                                                                                   | GSN     |
| 212226_s_at |      | -1.2 | phosphatidic acid phosphatase type 2B                                                                                                  | PPAP2B  |
| 212230_at   | -1.6 | -1.3 | phosphatidic acid phosphatase type 2B                                                                                                  | PPAP2B  |
| 200787_s_at | -1.8 |      | phosphoprotein enriched in astrocytes 15                                                                                               | PEA15   |
| 202149_at   |      | -1.2 | enhancer of filamentation 1 (cas-like docking; Crk-associated substrate related)                                                       | HEF1    |
| 213560_at   |      | -1.3 | growth arrest and DNA-damage-inducible, beta                                                                                           | GADD45B |
| 209305_s_at |      | 1.4  | growth arrest and DNA-damage-inducible protein GADD45beta                                                                              | GADD45B |
| 213931_at   | -1   |      | inhibitor of DNA binding 2, dominant negative helix-loop-helix protein                                                                 | ID2     |
| 209651_at   |      | -1.3 | Similar to transforming growth factor beta 1 induced transcript 1                                                                      | TGFB11  |
| 203868_s_at | -1.2 |      | vascular cell adhesion molecule 1                                                                                                      | VCAM1   |
| 207345_at   | -2   | -2.3 | follistatin, transcript variant FST317                                                                                                 | FST     |
| 204948_s_at | -1.1 | -1.9 | follistatin, transcript variant FST344                                                                                                 | FST     |
| 201645_at   | -1.3 |      | hexabrachion (tenascin C, cytostatin)                                                                                                  | HXB     |
| 203325_s_at |      | -1.1 | collagen, type V, alpha 1                                                                                                              | COL5A1  |
| 221731_x_at | -1.5 |      | chondroitin sulfate proteoglycan 2 (versican)                                                                                          | CSPG2   |
| 204620_s_at | -2   | -1.4 | chondroitin sulfate proteoglycan 2 (versican)                                                                                          | CSPG2   |
| 217161_x_at |      | -1.5 | cartilage specific proteoglycan (600 AA)                                                                                               | AGC1    |
| 209291_at   |      | -1   | inhibitor of DNA binding 4, dominant negative helix-loop-helix protein                                                                 | ID4     |
| 221963_x_at | -1.1 |      | thrombospondin 1                                                                                                                       | THBS1   |
| 211161_s_at | -1   |      | PRO3121                                                                                                                                | COL3A1  |
| 201110_s_at | -2.3 | -1.9 | thrombospondin 1                                                                                                                       | THBS1   |
| 213428_s_at |      | -1.1 | collagen, type VI, alpha 1                                                                                                             | COL6A1  |
| 213622_at   | -1.5 | -1.6 | collagen, type IX, alpha 2                                                                                                             | COL9A2  |
| 37892_at    |      | -3.7 | alpha-1 type XI collagen                                                                                                               | COL11A1 |
| 216993_s_at | -1   |      | collagen, type XI, alpha 2                                                                                                             | COL11A2 |
| 212865_s_at | -1.3 | -1.1 | collagen, type XIV, alpha 1 (undulin)                                                                                                  | COL14A1 |
| 212884_x_at | -1.1 |      | apolipoprotein E                                                                                                                       | APOE    |
| 207069_s_at |      | -1.6 | MAD (mothers against decapentaplegic, Drosophila) homolog 6                                                                            | MADH6   |
| 210162_s_at | -1.1 | -1.7 | NF-ATc mRNA                                                                                                                            | NFATC1  |
| 200884_at   | -1.5 |      | creatine kinase, brain                                                                                                                 | CKB     |
| 203936_s_at | -1.5 |      | matrix metalloproteinase 9 (gelatinase B, 92kD gelatinase, 92kD type IV collagenase)                                                   | MMP9    |
| 214866_at   |      | -1.3 | mRNA for urokinase plasminogen activator receptor                                                                                      | PLAUR   |
| 201860_s_at | -1.4 |      | plasminogen activator, tissue                                                                                                          | PLAT    |
| 200602_at   |      | -1.2 | Homo sapiens amyloid beta (A4) precursor protein (protease nexin-II, Alzheimer disease)                                                | APP     |
| 212588_at   | -1.4 |      | mRNA for T200 leukocyte common antigen (CD45, LC-A).                                                                                   | PTPRC   |

|             |      |      |                                                                              |       |
|-------------|------|------|------------------------------------------------------------------------------|-------|
| 204451_at   |      | -1.3 | frizzled (Drosophila) homolog 1                                              | FZD1  |
| 210105_s_at | -1.6 | -1.8 | FYN oncogene related to SRC, FGR, YES                                        | FYN   |
| 206219_s_at | -1.3 |      | vav 1 oncogene                                                               | VAV1  |
| 202957_at   | -1.1 |      | hematopoietic cell-specific Lyn substrate 1                                  | HCLS1 |
| 206283_s_at | -1.1 |      | T-cell acute lymphocytic leukemia 1                                          | TAL1  |
| 203549_s_at | -1.3 |      | lipoprotein lipase                                                           | LPL   |
| 206382_s_at |      | -2.6 | Homo sapiens brain-derived neurotrophic factor                               | BDNF  |
| 215148_s_at | -1.3 |      | amyloid beta (A4) precursor protein-binding, family A, member 3 (X11-like 2) | APBA3 |

REPRESSED TARGETS AMONG mRNAs ENRICHED IN ALPHA6+/MHCI+ CELLS

|             |   |     |                                                                                                  |       |
|-------------|---|-----|--------------------------------------------------------------------------------------------------|-------|
| 202431_s_at |   | 1   | v-myc avian myelocytomatosis viral oncogene homolog                                              | MYC   |
| 217165_x_at |   | 1.6 | metallothionein 1F (functional)                                                                  | MT1F  |
| 204745_x_at |   | 1.1 | metallothionein 1G                                                                               | MT1G  |
| 205480_s_at |   | 1.6 | UDP-glucose pyrophosphorylase 2                                                                  | UGP2  |
| 200951_s_at |   | 3.3 | cyclin D2                                                                                        | CCND2 |
| 204734_at   |   | 1.2 | keratin 15                                                                                       | KRT15 |
| 217234_s_at |   | 3.3 | cytovillin 2                                                                                     | VIL2  |
| 202712_s_at | 1 |     | creatine kinase, mitochondrial 1 (ubiquitous), nuclear gene encoding mitochondrial protein, mRNA | CKMT1 |
| 219850_s_at |   | 2.2 | Homo sapiens Ets homologous factor (EHF), mRNA.                                                  | EHF   |
| 217966_s_at |   | 1.7 | niban protein                                                                                    | NIBAN |
| 202546_at   | 1 | 3.2 | vesicle-associated membrane protein 8 (endobrevin)                                               | VAMP8 |
| 206393_at   |   | 1.4 | tropoin 1, skeletal, fast                                                                        | TNNI2 |

p53-Related

|           |      |  |                                                    |  |
|-----------|------|--|----------------------------------------------------|--|
| 211193_at | -1.1 |  | Homo sapiens p53 homolog (p40) mRNA, complete cds. |  |
|-----------|------|--|----------------------------------------------------|--|

INDUCED TARGETS AMONG mRNAs ENRICHED IN ALPHA+/MHCI+ CELLS

|             |     |     |                                               |         |
|-------------|-----|-----|-----------------------------------------------|---------|
| 203725_at   |     | 1.2 | growth arrest and DNA-damage-inducible, alpha | GADD45A |
| 202672_s_at |     | 3.3 | activating transcription factor 3             | ATF3    |
| 205891_at   |     | 1.5 | adenosine A2b receptor                        | ADORA2B |
| 212143_s_at | 1.1 |     | insulin-like growth factor binding protein 3  | IGFBP3  |

REPRESSED TARGETS AMONG mRNAs ENRICHED IN ALPHA+/MHCI- CELLS

|             |  |      |                                                          |       |
|-------------|--|------|----------------------------------------------------------|-------|
| 202729_s_at |  | -1.1 | latent transforming growth factor beta binding protein 1 | LTBP1 |
|-------------|--|------|----------------------------------------------------------|-------|

NFkB Activators

|             |   |     |                                                                |       |
|-------------|---|-----|----------------------------------------------------------------|-------|
| 205289_at   |   | 1.3 | bone morphogenetic protein 2                                   | BMP2  |
| 208309_s_at | 1 | 1.4 | mucosa associated lymphoid tissue lymphomatranslocation gene 1 | MALT1 |

NFkB Targets

INDUCED TARGETS AMONG mRNAs ENRICHED IN ALPHA6+/MHCI+ CELLS

|             |     |     |                                                                                      |             |
|-------------|-----|-----|--------------------------------------------------------------------------------------|-------------|
| 200748_s_at |     | 1.7 | ferritin, heavy polypeptide 1                                                        | FTH1        |
| 210095_s_at |     | 2   | Human growth hormone-dependent insulin-like growth factor-binding protein mRNA       | IGFBP1      |
| 200943_at   |     | 1   | high-mobility group (nonhistone chromosomal) protein 14                              | HMG14       |
| 209699_x_at | 1   |     | dihydrodiol dehydrogenase                                                            | AKR1C2      |
| 204881_s_at |     | 1.1 | UDP-glucose ceramide glucosyltransferase                                             | UGCG        |
| 202269_x_at |     | 1.2 | guanylate binding protein 1, interferon-inducible, 67kD                              | GBP-1       |
| 208711_s_at |     | 1.3 | cyclin D1 (PRAD1: parathyroid adenomatosis 1)                                        | CCND1       |
| 202672_s_at |     | 3.3 | activating transcription factor 3                                                    | ATF3        |
| 202071_at   | 1   |     | syndecan 4 (amphiglycan, ryudocan)                                                   | SDC4        |
| 204748_at   |     | 1.3 | prostaglandin-endoperoxide synthase 2 (prostaglandin GH synthase and cyclooxygenase) | PTGS2       |
| 205289_at   |     | 1.3 | bone morphogenetic protein 2                                                         | BMP2        |
| 208893_s_at |     | 3.5 | clone MGC:12852, mRNA                                                                | DUSP6       |
| 211985_s_at | 1.1 |     | matrix Gla protein                                                                   | MGP         |
| 209189_at   |     | 2.2 | v-fos FBJ murine osteosarcoma viral oncogene homolog                                 | FOS         |
| 216598_s_at |     | 5.4 | monocyte chemotactic protein (human, aortic endothelial cells, mRNA, 661 nt).        | MCP-1       |
| 200706_s_at |     | 2   | LPS-induced TNF-alpha factor                                                         | PIG7        |
| 217871_s_at |     | 1.8 | macrophage migration inhibitory factor (glycosylation-inhibiting factor)             | MIF         |
| 204285_s_at |     | 1.3 | phorbol-12-myristate-13-acetate-induced protein 1                                    | PMAP1       |
| 220494_s_at | 1   | 3.6 | lipopolysaccharide specific response-68 protein                                      | LSR68       |
| 202688_at   |     | 2.7 | tumor necrosis factor (ligand) superfamily, member 10                                | TNFSF10     |
| 202687_s_at |     | 1   | Apo-2 ligand                                                                         | TNFSF10     |
| 211911_x_at | 1.1 |     | MHC class I HLA B71                                                                  | HLA-B       |
| 217456_x_at |     | 1.1 | MHC class I HLA-B51                                                                  | HLA-B       |
| 208729_x_at | 2.4 |     | major histocompatibility complex, class I, B                                         | HLA-B       |
| 209140_x_at | 1   | 2   | MHC HLA-B39                                                                          | HLA-B39     |
| 214459_x_at |     | 1.1 | Cw1 antigen mRNA                                                                     | HLA-C       |
| 211799_x_at | 2.9 |     | HLA class I heavy chain                                                              | HLA-Cw*1701 |
| 200905_x_at | 1   |     | major histocompatibility complex, class I, E                                         | HLA-E       |
| 200904_at   |     | 1.6 | major histocompatibility complex, class I, E                                         | HLA-E       |
| 200041_s_at | 1.7 | 1   | HLA-B associated transcript-1                                                        | D6S81E      |
| 212384_at   |     | 1   | HLA-B associated transcript-1                                                        | D6S81E      |
| 202431_s_at |     | 1   | v-myc avian myelocytomatosis viral oncogene homolog                                  | MYC         |
| 201841_s_at |     | 3   | heat shock 27kD protein 1                                                            | HSPB1       |
| 217165_x_at |     | 1.6 | metallothionein 1F (functional)                                                      | MT1F        |
| 204745_x_at |     | 1.1 | metallothionein 1G                                                                   | MT1G        |

REPRESSED TARGETS AMONG mRNAs ENRICHED IN ALPHA6+/MHCI- CELLS

|             |      |      |                                                            |      |
|-------------|------|------|------------------------------------------------------------|------|
| 208650_s_at | -1.5 | -1.1 | CD24 antigen (small cell lung carcinoma cluster 4 antigen) | CD24 |
| 209771_x_at | -1.8 | -1.6 | CD24 antigen (small cell lung carcinoma cluster 4 antigen) | CD24 |

|             |      |      |                                                        |       |
|-------------|------|------|--------------------------------------------------------|-------|
| 266_s_at    | -1.9 | -1.5 | CD24 signal transducer                                 |       |
| 208651_x_at | -1.8 |      | signal transducer CD24                                 | CD24  |
| 216379_x_at | -1.8 | -1.6 | CD24 signal transducer                                 |       |
| 207345_at   | -2   | -2.3 | follistatin, transcript variant FST317                 | FST   |
| 204948_s_at | -1.1 | -1.9 | follistatin, transcript variant FST344                 | FST   |
| 215554_at   | -2.2 |      | glycosylphosphatidylinositol specific phospholipase D1 | GPLD1 |

#### Insulin-like Growth Factor Receptor Signalling

|             |      |      |                                                                                |        |
|-------------|------|------|--------------------------------------------------------------------------------|--------|
| 210095_s_at |      | 2    | Human growth hormone-dependent insulin-like growth factor-binding protein mRNA | IGFBP1 |
| 212143_s_at | 1.1  |      | insulin-like growth factor binding protein 3                                   | IGFBP3 |
| 211959_at   |      | -1.1 | Human insulin-like growth factor binding protein 5                             | IGFBP5 |
| 201163_s_at | -2.2 | -1.6 | insulin-like growth factor binding protein 7                                   | IGFBP7 |
| 203627_at   |      | -1.2 | insulin-like growth factor 1 receptor                                          | IGF1R  |
| 209184_s_at |      | -1   | insulin receptor substrate 2                                                   | IRS2   |
| 201626_at   |      | -1.2 | insulin induced gene 1                                                         |        |
| 218847_at   |      | -1   | IGF-II mRNA-binding protein 2                                                  | IMP-2  |
| 203820_s_at | 1.6  |      | IGF-II mRNA-binding protein 3                                                  | KOC1   |

#### Inositol Phospholipid Signalling

|             |      |      |                                                                          |          |
|-------------|------|------|--------------------------------------------------------------------------|----------|
| 203126_at   |      | 1.1  | inositol(myo)-1(or 4)-monophosphatase 2                                  | IMPA2    |
| 205376_at   | -1.2 |      | inositol polyphosphate-4-phosphatase, type II, 105kD                     | INPP4B   |
| 214151_s_at |      | -1   | phosphatidylinositol glycan, class B                                     | PIGB     |
| 214152_at   |      | -1.2 | phosphatidylinositol glycan, class B                                     | PIGB     |
| 212680_x_at |      | 3.9  | phospholipase C, beta 3, neighbor pseudogene                             | PLCB3NP  |
| 216217_at   | -1.4 |      | phospholipase C, epsilon 2                                               | PLCE2    |
| 213222_at   |      | -2   | phosphoinositide-specific phospholipase C-beta 1                         | KIAA0581 |
| 215554_at   | -2.2 |      | glycosylphosphatidylinositol specific phospholipase D1                   | GPLD1    |
| 203879_at   |      | -1.2 | phosphatidylinositol 3-kinase catalytic subunit p110delta                | PIK3CD   |
| 212181_s_at |      | -1.7 | diphosphoinositol polyphosphate phosphohydrolase type 2                  | NUDT4    |
| 212249_at   |      | 1    | phosphoinositide-3-kinase, regulatory subunit, polypeptide 1 (p85 alpha) | PIK3R1   |
| 215938_s_at |      | -1.3 | phospholipase A2, group VI (cytosolic, calcium-independent)              | PLA2G6   |
| 203895_at   | -1   |      | phospholipase C, beta 4                                                  | PLCB4    |
| 205111_s_at |      | -1.7 | pancreas-enriched phospholipase C                                        | LOC51196 |

#### Ribosome Biosynthesis

|                          |      |      |                                                                            |          |
|--------------------------|------|------|----------------------------------------------------------------------------|----------|
| 208692_at                |      | 1.8  | XP1PO ribosomal protein S3                                                 | rpS3     |
| 212391_x_at              |      | 1.6  | ribosomal protein S3A                                                      | RPS3A    |
| 209134_s_at              |      | 1.2  | ribosomal protein S6                                                       | RPS6     |
| 217747_s_at              |      | 1    | ribosomal protein S9                                                       | RPS9     |
| 214001_x_at              |      | -1.9 | ribosomal protein S10                                                      | RPS10    |
| 213350_at                |      | -1.8 | ribosomal protein S11                                                      | RPS11    |
| 212114_at                |      | -1   | ribosomal protein S13                                                      | RPS13    |
| 208645_s_at              |      | 2.6  | PRO2640                                                                    | RPS14    |
| 201258_at                |      | 2.4  | ribosomal protein S16                                                      | RPS16    |
| 213414_s_at              |      | 1.6  | ribosomal protein S19                                                      | RPS19    |
| 216246_at                | -1   | -1.8 | ribosomal protein S20                                                      | RPS20    |
| 214097_at                | 1.2  |      | ribosomal protein S21                                                      | RPS21    |
| 201094_at                |      | -1   | ribosomal protein S29                                                      | RPS29    |
| 201154_x_at              |      | 1.2  | ribosomal protein L4                                                       | RPL4     |
| 211710_x_at              |      | 1.2  | ribosomal protein L4                                                       | RPL4     |
| 200937_s_at              |      | 3.2  | ribosomal protein L5                                                       | RPL5     |
| 221989_at                |      | 1.1  | ribosomal protein L10                                                      | RPL10    |
| 213588_x_at              |      | -1   | ribosomal protein L14                                                      | RPL14    |
| 200022_at                |      | 1.4  | ribosomal protein L18                                                      | RPL18    |
| 214143_x_at              |      | -1   | ribosomal protein L24                                                      | RPL24    |
| 213642_at                |      | -1.5 | ribosomal protein L27                                                      | RPL27    |
| 203034_s_at              |      | 1.1  | ribosomal protein L27a                                                     | RPL27a   |
| 212044_s_at              | -1.1 |      | ribosomal protein L27a                                                     | RPL27a   |
| 200003_s_at              |      | 1.6  | ribosomal protein L28                                                      | RPL28    |
| 209203_s_at              |      | 2.1  | ribosomal protein L30                                                      | RPL30    |
| 200002_at                |      | 1.7  | ribosomal protein L35                                                      | RPL35    |
| 200092_s_at              |      | -1   | ribosomal protein L37                                                      | RPL37    |
| 214041_x_at              | -1.6 | -2.5 | ribosomal protein L37a                                                     | RPL37a   |
| 202028_s_at              |      | -1.4 | ribosomal protein L38                                                      | RPL38    |
| 221943_x_at              |      | -1.6 | ribosomal protein L38                                                      | RPL38    |
| 210115_at                | 2.8  | 1.3  | ribosomal protein L39                                                      | RPL39    |
| 208695_s_at              |      | -1.1 | ribosomal protein L39                                                      | RPL39    |
| 212199_at                |      | 1.1  | putative ribosomal protein S1                                              |          |
| 201033_x_at              |      | 1.1  | ribosomal protein, large, P0                                               | RPLP0    |
| 208856_x_at              |      | 1.4  | ribosomal protein, large, P0, clone MGC:4770                               | RPLP0    |
| 214167_s_at              |      | 1.4  | ribosomal protein, large, P0                                               | RPLP0    |
| 211720_x_at              |      | 1.5  | ribosomal protein, large, P0                                               | RPLP0    |
| 211972_x_at              |      | 1    | ribosomal protein, large, P0                                               | RPLP0    |
| 200908_s_at              |      | -1.3 | ribosomal protein, large P2                                                | RPLP2    |
| 209567_at                |      | 1.5  | Similar to regulator for ribosome resistance homolog (S. cerevisiae)       | KIAA0112 |
| 217559_at                |      | 1.1  | Highly similar to A42735 ribosomal protein L10, cytosolic                  | ESTs     |
| 207877_s_at              | 3.3  |      | nuclear VCP-like                                                           | NVL      |
| 201305_x_at              | 1    |      | acidic protein rich in leucines                                            | SSP29    |
| AFFX-r2-Hs18SrRNA-3_s_at |      | 1.1  | Human 18S rRNA sequence, length 1969 bases, 3 prime target bases 1293-1938 |          |
| AFFX-HUMRGE/M10098_3_at  |      | 1    | Human 18S rRNA gene, complete.                                             | 18S rRNA |
| AFFX-r2-Hs18SrRNA-M_x_at | -1.1 |      | Human 18S rRNA sequence, length 1969 bases, middle target bases 647-1292   |          |

#### Hedgehog Signalling

|           |    |  |                                                                       |     |
|-----------|----|--|-----------------------------------------------------------------------|-----|
| 205201_at | -1 |  | GLI-Kruppel family member GLI3 (Greig cephalopolysyndactyly syndrome) | GL3 |
|-----------|----|--|-----------------------------------------------------------------------|-----|

### Hedgehog Signalling Targets

|             |      |         |                                                                        |        |
|-------------|------|---------|------------------------------------------------------------------------|--------|
| 205916_at   |      | -4      | S100 calcium-binding protein A7 (psoriasis 1)                          | S100A7 |
| 203320_at   | -1.5 |         | lymphocyte adaptor protein                                             | LNK    |
| 213931_at   | -1   |         | inhibitor of DNA binding 2, dominant negative helix-loop-helix protein | ID2    |
| 208711_s_at |      | 1.3     | cyclin D1 (PRAD1: parathyroid adenomatosis 1)                          | CCND1  |
| 210105_s_at | -1.6 | -1.8    | FYN oncogene related to SRC, FGR, YES                                  | FYN    |
| 202431_s_at |      | 1       | v-myc avian myelocytomatosis viral oncogene homolog                    | MYC    |
| 204734_at   |      | 1.2     | keratin 15                                                             | KRT15  |
| 203213_at   |      | 1.7 1.5 | cell division cycle 2, G1 to S and G2 to M                             | CDC2   |
| 203214_x_at |      | 1.4     | cell division cycle 2, G1 to S and G2 to M                             | CDC2   |
| 210559_s_at |      | 1.2     | CDC2 delta T                                                           | CDC2   |
| 201645_at   |      | -1.3    | hexabrachion (tenascin C, cytotactin)                                  | HXB    |

### NOTCH Signalling

|             |  |      |                                                                        |        |
|-------------|--|------|------------------------------------------------------------------------|--------|
| 204888_s_at |  | -2.4 | neuralized (Drosophila)-like                                           | NEURL  |
| 202360_at   |  | -1   | homolog of Drosophila mastermind                                       | MAML1  |
| 209758_s_at |  | -1.2 | Human microfibril-associated glycoprotein-2 MAGP-2 mRNA, complete cds. | MAGP-2 |

### NOTCH Signalling Targets

|           |  |         |                                                                                    |      |
|-----------|--|---------|------------------------------------------------------------------------------------|------|
| 207720_at |  | -1.8    | loricrin                                                                           | LOR  |
| 201820_at |  | 1       | keratin 5 (epidermolysis bullosa simplex, Dowling-MearaKobnerWeber-Cockayne types) | KRT5 |
| 215704_at |  | -2.4 -2 | flaggrin                                                                           | FLG  |

### Cell Cycle

|             |  |           |                                                                                         |          |
|-------------|--|-----------|-----------------------------------------------------------------------------------------|----------|
| 214710_s_at |  | 2.2 1.8   | cyclin B1                                                                               | CCNB1    |
| 202705_at   |  | 1.7       | cyclin B2                                                                               | CCNB2    |
| 208711_s_at |  | 1.3       | cyclin D1 (PRAD1: parathyroid adenomatosis 1)                                           | CCND1    |
| 200951_s_at |  | 3.3       | cyclin D2                                                                               | CCND2    |
| 204995_at   |  | -1        | cyclin-dependent kinase 5, regulatory subunit 1 (p35)                                   | CDK5R1   |
| 211297_s_at |  | 1.5 2.3   | serinethreonine kinase stk1 mRNA                                                        | CDK7     |
| 203468_at   |  | -1        | cyclin-dependent kinase (CDC2-like) 10                                                  | CDK10    |
| 213348_at   |  | -1.1      | cyclin-dependent kinase inhibitor 1C (p57, Kip2)                                        | CDKN1C   |
| 213183_s_at |  | -1.5 -2.1 | cyclin-dependent kinase inhibitor 1C (p57, Kip2)                                        | CDKN1C   |
| 209644_x_at |  | -3.1      | cyclin-dependent kinase inhibitor 2A (melanoma, p16, inhibits CDK4)                     | CDKN2A   |
| 210567_s_at |  | 1.3       | Similar to S-phase kinase-associated protein 2 (p45), clone MGC:1366                    |          |
| 209642_at   |  | 1.3       | putative mitotic checkpoint kinase mRNA                                                 | BUB1     |
| 206205_at   |  | 1.3       | M-phase phosphoprotein 9                                                                | MPHOSPH9 |
| 215731_s_at |  | 1.1       | mRNA for M-phase phosphoprotein                                                         | mpp9     |
| 203213_at   |  | 1.7 1.5   | cell division cycle 2, G1 to S and G2 to M                                              | CDC2     |
| 203214_x_at |  | 1.4       | cell division cycle 2, G1 to S and G2 to M                                              | CDC2     |
| 210559_s_at |  | 1.2       | CDC2 delta T                                                                            | CDC2     |
| 203968_s_at |  | 1.6       | CDC6 (cell division cycle 6, S. cerevisiae) homolog                                     | CDC6     |
| 208022_s_at |  | 1.3       | CDC14 (cell division cycle 14, S. cerevisiae) homolog B                                 | CDC14B   |
| 221555_x_at |  | -1.1      | CDC14 (cell division cycle 14, S. cerevisiae) homolog B                                 | CDC14B   |
| 204695_at   |  | 2.6       | cell division cycle 25A                                                                 | CDC25A   |
| 214230_at   |  | 1.2       | cell division cycle 42 (GTP-binding protein, 25kD)                                      | CDC42    |
| 208728_s_at |  | 1.2       | cell division cycle 42 (GTP-binding protein, 25kD), clone MGC:5044                      | CDC42    |
| 201897_s_at |  | 1.1 1.6   | CDC28 protein kinase 1                                                                  | CKS1     |
| 204170_s_at |  | 1.1       | CDC28 protein kinase 2                                                                  | CKS2     |
| 205393_s_at |  | 1.7       | CHK1 (checkpoint, S.pombe) homolog                                                      | CHEK1    |
| 214607_at   |  | -1.7      | p21 (CDKN1A)-activated kinase 3                                                         | PAK3     |
| 213524_s_at |  | -1        | putative lymphocyte G0G1 switch gene                                                    | G0S2     |
| 201725_at   |  | 1.4 1.1   | D123 gene product                                                                       | D123     |
| 204021_s_at |  | 1         | purine-rich element binding protein A                                                   | PURA     |
| 208743_s_at |  | 4.8       | tyrosine 3-monooxygenasetryptophan5-monooxygenase activation protein, beta polypeptide  | YWHAH    |
| 200638_s_at |  | 2.2       | tyrosine 3-monooxygenasetryptophan 5-monooxygenase activation protein, zeta polypeptide | YWHAZ    |
| 200640_at   |  | 1.6       | tyrosine 3-monooxygenasetryptophan5-monooxygenase activation protein, zeta polypeptide  | YWHAZ    |

### Chromosome Remodeling, Replication & Repair

|             |  |           |                                                                  |                |
|-------------|--|-----------|------------------------------------------------------------------|----------------|
| 201291_s_at |  | 4.5 2.1   | topoisomerase (DNA) II alpha (170kD)                             | TOP2A          |
| 201292_at   |  | 2 2.1     | topoisomerase (DNA) II alpha (170kD)                             | TOP2A          |
| 207168_s_at |  | 1         | H2A histone family, member Y                                     | H2AFY          |
| 209911_x_at |  | -1        | H2B histone family, member B                                     | H2BFB          |
| 205659_at   |  | -1.6 -2.5 | histone deacetylase 7B (HDAC7B-PENDING)                          | HDAC7B-PENDING |
| 208025_s_at |  | -1.8      | high-mobility group (nonhistone chromosomal) protein isoform I-C | HMGIC          |
| 217937_s_at |  | -2.6      | histone deacetylase 7A (HDAC7), transcript variant 2             | HDAC7          |
| 200853_at   |  | 1.3       | H2A histone family, member Z                                     | H2AFZ          |
| 200679_x_at |  | 2.6       | high-mobility group (nonhistone chromosomal) protein 1           | HMG1           |
| 200943_at   |  | 1         | high-mobility group (nonhistone chromosomal) protein 14          | HMG14          |
| 206052_s_at |  | 1         | Hairpin binding protein, histone                                 | HBP            |
| 202591_s_at |  | 1.2       | single-stranded DNA-binding protein                              | SSBP           |
| 204146_at   |  | 1.1       | RAD51-interacting protein                                        | PIR51          |
| 200607_s_at |  | 1.6       | RAD21 (S. pombe) homolog                                         | RAD21          |
| 209849_s_at |  | 1.2       | Rad51C                                                           | RAD51C         |
| 37793_r_at  |  | -1.2      | RAD51D mRNA                                                      | RAD51D         |
| 210416_s_at |  | 1.1       | protein kinase Chk2                                              | RAD53          |
| 203461_at   |  | -1.9      | chromodomain helicase DNA binding protein 2                      | CHD2           |
| 1053_at     |  | 1.3       | HUMA1SBU Human replication factor C, 40-kDa subunit (A1)         |                |
| 203696_s_at |  | 1         | replication factor C (activator 1) 2 (40kD)                      | RFC2           |
| 211503_s_at |  | 3.2       | replication factor C (activator 1) 3 (38kD)                      | RFC3           |
| 204023_at   |  | 1.1       | replication factor C (activator 1) 4 (37kD)                      | RFC4           |
| 203209_at   |  | 1.2       | replication factor C (activator 1) 5 (36.5kD)                    | RFC5           |

|             |      |      |                                                                                                                                           |          |
|-------------|------|------|-------------------------------------------------------------------------------------------------------------------------------------------|----------|
| 209421_at   |      | 1.3  | mutS (E. coli) homolog 2 (colon cancer, nonpolyposis type 1)                                                                              | hMSH2    |
| 205887_x_at | -1.1 |      | mutS (E. coli) homolog 3                                                                                                                  | MSH3     |
| 212913_at   |      | -1.2 | mutS (E. coli) homolog 5                                                                                                                  | MSH5     |
| 203755_at   |      | 1.6  | budding uninhibited by benzimidazoles 1 (yeast homolog), beta                                                                             | BUB1B    |
| 201457_x_at |      | 1.3  | kinetochore protein BUB3                                                                                                                  | BUB3     |
| 218663_at   |      | 3.9  | chromosome condensation protein G                                                                                                         | HCAP-G   |
| 218662_s_at |      | 1.7  | chromosome condensation protein G                                                                                                         | HCAP-G   |
| 201774_s_at |      | 1.2  | chromosome condensation-related SMC-associated protein 1                                                                                  | KIAA0159 |
| 222037_at   |      | 1.2  | 3.4 minichromosome maintenance deficient (S. cerevisiae) 4                                                                                | MCM4     |
| 212141_at   |      | 1    | minichromosome maintenance deficient (S. cerevisiae) 4                                                                                    | MCM4     |
| 220651_s_at |      | 1.2  | homolog of yeast MCM10                                                                                                                    | PRO2249  |
| 218009_s_at |      | 1.6  | protein regulator of cytokinesis 1                                                                                                        | PRC1     |
| 209172_s_at |      | 1.4  | mitosin                                                                                                                                   | CENPF    |
| 204853_at   |      | 1.3  | origin recognition complex, subunit 2 (yeasthomolog)-like                                                                                 | ORC2L    |
| 204957_at   |      | 1    | origin recognition complex, subunit 5 (yeasthomolog)-like                                                                                 | ORC5L    |
| 205296_at   |      | 1    | retinoblastoma-like 1 (p107)                                                                                                              | RBL1     |
| 201112_s_at |      | 1.1  | 2.1 chromosome segregation 1 (yeast homolog)-like                                                                                         | CSE1L    |
| 203362_s_at |      | 1    | MAD2 (mitotic arrest deficient, yeast, homolog)-like 1                                                                                    | MAD2L1   |
| 216039_at   |      | -1.5 | postmeiotic segregation increased 2-like 6 / Human PMS8 mRNA (yeast mismatch repair gene PMS1 homologue), partial cds (C-terminal region) |          |
| 207598_x_at |      | -1.6 | X-ray repair complementing defective repair in Chinese hamster cells 2, mRNA. / X-ray repair cross complementing protein 2                | XRCC2    |
| 200792_at   |      | 1.4  | thyroid autoantigen 70kD (Ku antigen)                                                                                                     | G22P1    |
| 204962_s_at |      | 1.5  | 1.7 centromere protein A (17kD)                                                                                                           | CENPA    |
| 207828_s_at |      | 1.9  | centromere protein F (350400kD, mitosin)                                                                                                  | CENPF    |
| 201970_s_at |      | 1.7  | 2.9 nuclear autoantigenic sperm protein (histone-binding)                                                                                 | NASP     |
| 201663_s_at |      | 1.4  | chromosome-associated polypeptide C                                                                                                       | CAP-C    |
| 201606_s_at |      | 1.3  | nuclear phosphoprotein similar to S. cerevisiae PWP1                                                                                      | PWP1     |
| 215424_s_at |      | 1.3  | 1.5 SKI-INTERACTING PROTEIN                                                                                                               | SNW1     |
| 212257_s_at |      | -4.1 | SWISNF related, matrix associated, actin dependent regulator of chromatin, subfamily a, member 2                                          | SMARCA2  |
| 206542_s_at |      | 1    | SWISNF related, matrix associated, actin dependent regulator of chromatin, subfamily a, member 2                                          | SMARCA2  |
| 206544_x_at |      | 1.4  | SWISNF related, matrix associated, actindependent regulator of chromatin, subfamily a, member 2                                           | SMARCA2  |
| 202303_x_at |      | 1    | SWISNF related, matrix associated, actindependent regulator of chromatin, subfamily a, member 5                                           | SMARCA5  |
| 203183_s_at |      | -1.3 | SWISNF related, matrix associated, actin dependent regulator of chromatin, subfamily d, member 1                                          | SMARCD1  |
| 209518_at   |      | -1.4 | SWISNF related, matrix associated, actin dependent regulator of chromatin, subfamily d, member 1                                          | SMARCD1  |
| 209305_s_at |      | 1.4  | growth arrest and DNA-damage-inducible proteinGADD45beta                                                                                  | GADD45B  |
| 213560_at   |      | -1.3 | growth arrest and DNA-damage-inducible, beta                                                                                              | GADD45B  |
| 204121_at   |      | -1.2 | growth arrest and DNA-damage-inducible, gamma                                                                                             | GADD45G  |
| 205848_at   |      | -2.1 | -2.6 growth arrest-specific 2                                                                                                             | GAS2     |
| 211067_s_at |      | -1.4 | growth arrest-specific 7                                                                                                                  |          |
| 209922_at   |      | 4.4  | BRCA1-associated protein 2                                                                                                                | BRAP2    |
| 204531_s_at |      | 1    | breast cancer 1, early onset                                                                                                              | BRCA1    |
| 205345_at   |      | 1    | 2.5 BRCA1 associated RING domain 1                                                                                                        | BARD1    |
| 203764_at   |      | 1.9  | 1.4 KIAA0008 gene product                                                                                                                 | KIAA0008 |
| 204162_at   |      | 2.9  | 1.9 highly expressed in cancer, rich in leucine heptad repeats                                                                            | HEC      |
| 217985_s_at |      | 2.1  | 2.1 bromodomain adjacent to zinc finger domain, 1A                                                                                        | BAZ1A    |
| 213971_s_at |      | 1    | KIAA0160 protein                                                                                                                          | KIAA0160 |
| 218585_s_at |      | 1.5  | L2DTL protein                                                                                                                             | L2DTL    |
| 214911_s_at |      | 1.3  | 1.3 bromodomain-containing 2                                                                                                              | BRD2     |
| 208685_x_at |      | 1    | 1 bromodomain-containing 2                                                                                                                | BRD2     |
| 221776_s_at |      | 1.4  | 1.4 bromodomain-containing 7                                                                                                              | BRD7     |
| 213879_at   |      | -1.6 | SMT3 (suppressor of mif two 3, yeast) homolog 2                                                                                           | SMT3H2   |
| 204026_s_at |      | 1.1  | ZW10 interactor                                                                                                                           | ZWINT    |
| 208740_at   |      | 1.1  | 1.1 sin3-associated polypeptide, 18kD                                                                                                     | SAP18    |
| 211450_s_at |      | 1.1  | 1.1 Homo sapiens GTBP mRNA for GTBP-ALT, complete cds.                                                                                    | GTBP     |
| 213289_at   |      | 1.2  | 1.2 proliferation-associated 2G4, 38kD                                                                                                    | PA2G4    |
| 221381_s_at |      | 1.1  | 1.1 mortality factor 4                                                                                                                    | MORF4    |
| 213864_s_at |      | 1    | 1 nucleosome assembly protein 1-like 1                                                                                                    | NAP1L1   |
| 208752_x_at |      | 1.2  | 1.2 nucleosome assembly protein 1-like 1                                                                                                  | NAP1L1   |
| 202305_s_at |      | 1.1  | 1.1 fasciculation and elongation protein zeta 2 (zyglin II)                                                                               | FEZ2     |
| 211826_s_at |      | -1.1 | 1.1 Human MLL-AF4 der(11) fusion protein mRNA, complete cds.                                                                              | MLL2     |
| 212079_s_at |      | 2.2  | 2.2 myeloidlymphoid or mixed-lineage leukemia (trithorax (Drosophila) homolog)                                                            | MLL      |
| 209486_at   |      | 2.2  | 2.2 Homo sapiens, disrupter of silencing 10, clone MGC:11290, mRNA, complete cds.                                                         | SAS10    |
| 209715_at   |      | 1.1  | 1.1 chromobox homolog 5 (Drosophila HP1 alpha)                                                                                            | CBX5     |
| 220605_s_at |      | -1.4 | 1.1 Homo sapiens sirtuin (silent mating type information regulation 2, S.cerevisiae, homolog) 2 (SIRT2), transcript variant 1, mRNA.      | SIRT2    |
| 202383_at   |      | -1.2 | 1.2 SMC (mouse) homolog, X chromosome                                                                                                     | SMCX     |
| 209579_s_at |      | 1    | 1 methyl-CpG binding domain protein 4                                                                                                     | MBD4     |

#### RNA Helicases

|             |  |     |                                                                                                     |        |
|-------------|--|-----|-----------------------------------------------------------------------------------------------------|--------|
| 212107_s_at |  | 3.1 | DEADH (Asp-Glu-Ala-AspHis) box polypeptide 9 (RNA helicase A, nuclear DNA helicase II; leukophysin) | DDX9   |
| 201386_s_at |  | 1.1 | 1.1 dead box protein 15                                                                             | DDX15  |
| 208151_x_at |  | -1  | 1.1 DEADH (Asp-Glu-Ala-AspHis) box polypeptide 17, isoform 2                                        | DDX17  |
| 217862_at   |  | 1.3 | 1.3 DEADH (Asp-Glu-Ala-AspHis) box binding protein 1                                                | DDXBP1 |
| 205001_s_at |  | 1.3 | 1.6 Homo sapiens dead box, Y isoform (DBY) mRNA, alternative transcript 1, complete cds.            | DBY    |
| 201161_s_at |  | 3.9 | 3.9 cold shock domain protein A                                                                     | CSDA   |

#### Cell Proliferation / Metastasis

|             |  |      |                                                          |       |
|-------------|--|------|----------------------------------------------------------|-------|
| 213906_at   |  | 1.2  | v-myb avian myeloblastosis viral oncogene homolog-like 1 | MYBL1 |
| 206219_s_at |  | -1.3 | vav 1 oncogene                                           | VAV1  |

|             |      |      |                                                                         |              |
|-------------|------|------|-------------------------------------------------------------------------|--------------|
| 205051_s_at | -2.6 |      | v-kit Hardy-Zuckerman 4 feline sarcoma viral oncogene homolog precursor | KIT          |
| 202932_at   |      | 2.1  | v-yes-1 Yamaguchi sarcoma viral oncogene homolog 1                      | YES1         |
| 208893_s_at |      | 3.5  | clone MGC:12852                                                         | DUSP6        |
| 201032_at   |      | 2.3  | bladder cancer associated protein                                       | BLCAP        |
| 212332_at   |      | 1.8  | retinoblastoma-like 2 (p130)                                            | RBL2         |
| 203554_x_at | 1.1  | 1    | pituitary tumor-transforming 1                                          | PTTG1        |
| 211599_x_at |      | -1.4 | Human (tpr-met fusion) oncogene mRNA, complete cds.                     | tpmet fusion |
| 214321_at   |      | -2   | nephroblastoma overexpressed gene                                       | NOV          |
| 201730_s_at |      | 1.1  | translocated promoter region (to activated MET oncogene)                | TPR          |
| 212768_s_at | -4.5 | -2   | differentially expressed in hematopoietic lineages                      | GW112        |
| 205053_at   |      | 1    | primase, polypeptide 1 (49kD)                                           | PRIM1        |
| 204783_at   | -1.1 |      | myeloid leukemia factor 1                                               | MLF1         |
| 207002_s_at | -1   |      | pleiomorphic adenoma gene-like 1 isoform 1                              | PLAGL1       |
| 207943_x_at | -1   |      | pleiomorphic adenoma gene-like 1 isoform 1                              | PLAGL1       |
| 205372_at   |      | -1.3 | pleiomorphic adenoma gene-like 1 isoform 1                              | PLAGL1       |
| 202925_s_at | -1.2 |      | pleiomorphic adenoma gene-like 2                                        | PLAGL2       |
| 203246_s_at | 1.3  |      | homologous to yeast nitrogen permease (candidate tumor suppressor)      | NPR2L        |
| 219813_at   | -2   |      | LATS (large tumor suppressor, Drosophila)homolog 1                      | LATS1        |
| 220253_s_at |      | 1    | potential tumor suppressor                                              | ST7          |
| 201577_at   | 1.2  | 1.2  | non-metastatic cells 1 protein                                          | NME1         |
| 203798_s_at | 1.2  |      | visinin-like 1                                                          | VSNL1        |
| 218557_at   |      | 1.6  | Nit protein 2                                                           | NIT2         |
| 210517_s_at | -1.1 | -1   | Homo sapiens mRNA for gravin, complete cds.                             | AKAP12       |
| 213764_s_at |      | -2.8 | paternally expressed 3                                                  | PEG3         |
| 209242_at   |      | -1.2 | paternally expressed 3                                                  | PEG3         |
| 200811_at   |      | 1.4  | cold inducible RNA-binding protein                                      | CRIBP        |
| 217996_at   | -1   |      | pleckstrin homology-like domain, family A, member 1                     | PHLDA1       |
| 206132_at   | -1.1 |      | mutated in colorectal cancers                                           | MCC          |
| 200920_s_at |      | 3.5  | B-cell translocation gene 1, anti-proliferative                         | BTG1         |
| 219416_at   |      | -1.2 | CSR1 protein                                                            | CSR1         |
| 213134_x_at |      | 1    | BTG family, member 3                                                    | BTG3         |
| 201904_s_at |      | 1.1  | HYA22 protein                                                           | HYA22        |
| 205081_at   |      | 1.4  | cysteine-rich protein 1 (intestinal)                                    | CRIP1        |
| 214139_at   | -1.2 |      | RBP1-like protein                                                       | BCAA         |
| 204135_at   |      | -1   | downregulated in ovarian cancer 1                                       | DOC1         |

#### Ribonucleoproteins and Related Genes

|             |      |     |                                                                                         |          |
|-------------|------|-----|-----------------------------------------------------------------------------------------|----------|
| 217829_s_at | 2.6  |     | SnRNP assembly defective 1 homolog                                                      | SAD1     |
| 200751_s_at |      | 1.7 | heterogeneous nuclear ribonucleoprotein C (C1C2)                                        | HNRPC    |
| 212626_x_at |      | 1.2 | heterogeneous nuclear ribonucleoprotein C (C1C2)                                        | HNRPC    |
| 209330_s_at | 1.3  |     | heterogeneous nuclear ribonucleoprotein D                                               | HNRPD    |
| 214379_at   | -1.2 |     | heterogeneous nuclear ribonucleoprotein D-like                                          | HNRPDL   |
| 201132_at   |      | 1   | heterogeneous nuclear ribonucleoprotein H2 (H)                                          | HNRPH2   |
| 207127_s_at | 1.4  |     | heterogeneous nuclear ribonucleoprotein H3 (2H9)                                        | HNRPH3   |
| 210110_x_at | 1.4  |     | hnRNP 2H9D                                                                              | HNRPH3   |
| 210588_x_at | 1.6  |     | ribonucleoprotein                                                                       | HNRPH3   |
| 216977_x_at |      | 1.1 | U2 snRNP-specific A protein                                                             | SNRPA1   |
| 200826_at   |      | 1.5 | small nuclear ribonucleoprotein D2 polypeptide(16.5kD)                                  | SNRPD2   |
| 208174_x_at |      | -1  | U2 small nuclear ribonucleoprotein auxiliary factor, small subunit 2                    | U2AF1RS2 |
| 202209_at   | 1.1  |     | Lsm3 protein                                                                            | LSM3     |
| 204559_s_at |      | 4.9 | U6 snRNA-associated Sm-like protein LSm7                                                | LOC51690 |
| 211747_s_at |      | 1.3 | U6 snRNA-associated Sm-like protein                                                     |          |
| 208859_s_at |      | 2.1 | alpha thalassaemia mental retardation syndrome X-linked (RAD54 (S. cerevisiae) homolog) | ATRX     |
| 208900_s_at |      | 1.9 | topoisomerase (DNA) I                                                                   | TOP1     |
| 215410_at   | -1.6 |     | postmeiotic segregation increased 2-like 8                                              | PMS2L14  |
| 200072_s_at |      | 1.3 | Homo sapiens M4 protein deletion mutant mRNA, complete cds.                             | HNRPM    |
| 205443_at   |      | 1.2 | small nuclear RNA activating complex, polypeptide 1, 43kD                               | SNAPC1   |
| 209104_s_at |      | 1.5 | likely homolog of yeast Nhp2, component of theHACA snoRNP; hypothetical protein         | NOLA2    |
|             |      |     | FLJ20479                                                                                |          |

#### Related to Mitochondria

|             |      |      |                                                                                                                                                |          |
|-------------|------|------|------------------------------------------------------------------------------------------------------------------------------------------------|----------|
| 219645_at   | -1.3 | -1.6 | calsequestrin 1 (fast-twitch, skeletal muscle), nuclear gene encoding mitochondrial protein, mRNA                                              | CASQ1    |
| 221437_s_at |      | 2.6  | mitochondrial ribosomal protein S15                                                                                                            | MRPS15   |
| 201322_at   |      | 1    | ATP synthase, H+ transporting, mitochondrial F1 complex, beta polypeptide                                                                      | ATP5B    |
| 205711_x_at |      | 2.3  | ATP synthase, H+ transporting, mitochondrial F1 complex, gamma polypeptide 1                                                                   | ATP5C1   |
| 213366_x_at |      | 1.5  | ATP synthase, H+ transporting, mitochondrial F1 complex, gamma polypeptide 1                                                                   | ATP5C1   |
| 207573_x_at |      | 1    | ATP synthase, H+ transporting, mitochondrial F1F0, subunit g                                                                                   | ATP5JG   |
| 202961_s_at | 1    |      | ATP synthase, H+ transporting, mitochondrial F0 complex, subunit f, isoform 2                                                                  | ATP5J2   |
| 200818_at   |      | 1.2  | ATP synthase, H+ transporting, mitochondrial F1 complex, O subunit (oligomycin sensitivity conferring protein)                                 | ATP5O    |
| 201634_s_at |      | 2    | cytochrome b5 outer mitochondrial membrane precursor                                                                                           | CYB5-M   |
| 201931_at   |      | 1.9  | electron-transfer-flavoprotein, alpha polypeptide (glutaric aciduria II), nuclear gene encoding mitochondrial protein, mRNA                    | ETF A    |
| 211855_s_at | 1.5  |      | mitochondrial uncoupling protein 5 short form with insertion mRNA                                                                              | SLC25A14 |
| 204587_at   | 1.1  |      | solute carrier family 25 (mitochondrial carrier, brain), member 14, transcript variant long, nuclear gene encoding mitochondrial protein, mRNA | SLC25A14 |
| 212085_at   |      | 1.6  | solute carrier family 25 (mitochondrial carrier; adenine nucleotide translocator), member 6                                                    | SLC25A6  |
| 217955_at   |      | 1.5  | MIL1 protein, nuclear gene encoding mitochondrial protein, mRNA                                                                                | MIL1     |
| 209932_s_at |      | 1.1  | deoxyuridine triphosphate nucleotidohydrolase precursor mRNA, nuclear gene encoding mitochondrial protein, complete cds                        | DUT      |
| 207275_s_at |      | -1.4 | fatty-acid-Coenzyme A ligase, long-chain 1, nuclear gene encoding mitochondrial protein, mRNA                                                  | FACL1    |
| 203945_at   |      | -1.4 | arginase, type II, nuclear gene encoding mitochondrial protein, mRNA                                                                           | ARG2     |
| 210069_at   |      | -1.4 | palmitoyltransferase 1 mRNA, nuclear gene encoding mitochondrial protein, complete cds                                                         | CPT1B    |
| 202002_at   |      | -1.5 | acetyl-Coenzyme A acyltransferase 2 (mitochondrial 3-oxoacyl-Coenzyme A thiolase)                                                              | ACAA2    |
| 211150_s_at | 3    |      | M2 mitochondrial autoantigen dihydroipoamide acetyltransferase                                                                                 | DLAT     |

|             |           |                                                                                                                               |                                  |
|-------------|-----------|-------------------------------------------------------------------------------------------------------------------------------|----------------------------------|
| 211594_s_at | 2         | MRPL9 mRNA for mitochondrial ribosomal protein L9 (L9mt)                                                                      | MRPL9                            |
| 218119_at   | 1.6       | translocase of inner mitochondrial membrane 23 (yeast) homolog                                                                | TIM23                            |
| 218118_s_at | 1.6       | translocase of inner mitochondrial membrane 23 (yeast) homolog                                                                | TIM23                            |
| 210154_at   | 1.4       | mitochondrial NAD(P)+ dependent malic enzyme mRNA                                                                             | NAD(P)+ - dependent malic enzyme |
| 202712_s_at | 1         | creatine kinase, mitochondrial 1 (ubiquitous), nuclear gene encoding mitochondrial protein, mRNA                              | CKMT1                            |
| 36830_at    | 1.2       | mitochondrial intermediate peptidase precursor                                                                                | MIPEP                            |
| 217772_s_at | 1.1       | mitochondrial carrier homolog 2, nuclear gene encoding mitochondrial protein                                                  | MTCH2                            |
| 204389_at   | 1         | monoamine oxidase A, nuclear gene encoding mitochondrial protein, mRNA                                                        | MAOA                             |
| 210418_s_at | 1         | NAD+-specific isocitrate dehydrogenase beta subunit isoform A mRNA, nuclear gene encoding mitochondrial product, complete cds | IDH3B                            |
| 202785_at   | 2.6       | NADH dehydrogenase (ubiquinone) 1 alpha subcomplex, 7 (14.5kD, B14.5a)                                                        | NDUFA7                           |
| 210226_at   | 2.6       | NADH dehydrogenase (ubiquinone) 1 beta subcomplex, 8 (19kD, ASH1)                                                             | NDUFB8                           |
| 202941_at   | 1         | NADH dehydrogenase (ubiquinone) flavoprotein 2 (24kD)                                                                         | NDUFV2                           |
| 203039_s_at | 1.1       | NADH dehydrogenase (ubiquinone) Fe-S protein 1 (75kD) (NADH-coenzyme Q reductase)                                             | NDUFS1                           |
| 210800_at   | -1.3 -1.2 | Homo sapiens, clone MGC:12262, mRNA, complete cds.                                                                            | TIMM8A                           |

#### Apoptosis

|             |         |                                                              |          |
|-------------|---------|--------------------------------------------------------------|----------|
| 208945_s_at | 1       | beclin 1 (coiled-coil, myosin-like BCL2-interacting protein) | BECN1    |
| 202984_s_at | 3.3     | BCL2-associated athanogene 5                                 | BAG5     |
| 202036_s_at | 1.3     | secreted apoptosis related protein 2                         | SARP2    |
| 222158_s_at | 1.9     | apoptosis-related protein PNAS-4                             | PNAS-4   |
| 210792_x_at | 2.4     | Siva-2 mRNA                                                  | SIVA-2   |
| 203139_at   | -2      | death-associated protein kinase 1                            | DAPK1    |
| 209323_at   | 1.4     | death associated protein 4                                   | DAP4     |
| 220864_s_at | 2       | CGI-39 protein; cell death-regulatory protein GRIM19         | LOC51079 |
| 211367_s_at | 1.5     | interleukin 1-beta converting enzyme isoform delta           | IL1BCE   |
| 211368_s_at | 1.1     | interleukin 1-beta converting enzyme isoform epsilon         | IL1BCE   |
| 211366_x_at | 1       | interleukin 1-beta converting enzyme isoform gamma           | IL1BCE   |
| 220451_s_at | -1.1    | livin inhibitor-of-apoptosis                                 | LIVIN    |
| 204237_at   | -1.2 -1 | CED-6 protein                                                | CED-6    |
| 204235_s_at | -1.6    | PTB domain adaptor protein CED-6                             | CED-6    |
| 203089_s_at | 2.6     | Htra-like serine protease                                    | OMI      |
| 213762_x_at | 1       | RNA binding motif protein, X chromosome                      | RBMX     |
| 216842_x_at | -1.8    | Human RNA binding motif (RBM) gene, partial cds              |          |
| 214618_at   | -1.4    | Usurpin-gamma                                                | CFLAR    |
| 205063_at   | 1.4     | survival of motor neuron protein interactingprotein 1        | SIP1     |

#### Growth Factor Related

|             |           |                                                                                                 |          |
|-------------|-----------|-------------------------------------------------------------------------------------------------|----------|
| 216061_x_at | -1 -1.1   | platelet-derived growth factor beta polypeptide (simian sarcoma viral (v-sis) oncogene homolog) | PDGFB    |
| 217886_at   | -1        | epidermal growth factor receptor pathway substrate 15                                           | EPS15    |
| 222113_s_at | -1 -1.3   | epidermal growth factor receptor substrate EPS15R                                               | EPS15R   |
| 209409_at   | -1.1 -1.8 | growth factor receptor-bound protein 10                                                         | KIAA0207 |
| 35150_at    | -1.2      | CDw40 mRNA for nerve growth factor receptor-related B-lymphocyte activation molecule            |          |
| 219304_s_at | -1.2 -1.4 | spinal cord-derived growth factor-B                                                             | SCDGF-B  |
| 205782_at   | -1.5      | fibroblast growth factor 7 (keratinocyte growth factor)                                         | FGF7     |
| 209466_x_at | -1.5      | nerve growth factor                                                                             | HBNF-1   |
| 206404_at   | -1 -1.7   | fibroblast growth factor 9 (glia-activating factor)                                             | FGF9     |

#### Transmembrane Molecules and Related genes

##### Receptors

|             |           |                                                                                   |         |
|-------------|-----------|-----------------------------------------------------------------------------------|---------|
| 211535_s_at | -2.5      | fibroblast growth factor receptor                                                 | FGFR1   |
| 213816_s_at | -1.1      | met proto-oncogene (hepatocyte growth factor receptor)                            | MET     |
| 205696_s_at | -1.5      | GDNF family receptor alpha 1                                                      | GFRA1   |
| 204464_s_at | -1.1 -1.4 | endothelin receptor type A                                                        | EDNRA   |
| 204273_at   | -2.8 -1.3 | endothelin receptor type B                                                        | EDNRB   |
| 204271_s_at | -2 -1.3   | endothelin receptor                                                               | ETs     |
| 217045_x_at | -1.1      | lymphocyte antigen 95 (activating NK-receptor ; NK-p44)                           | LY95    |
| 211516_at   | -1.1      | interleukin 5 receptor alpha-subunit                                              | IL5R    |
| 220056_at   | -1.1      | interleukin 22 receptor                                                           | IL22R   |
| 221444_at   | -1.2      | taste receptor, type 2, member 16                                                 | TAS2R16 |
| 205159_at   | -1.2      | colony stimulating factor 2 receptor, beta, low-affinity (granulocyte-macrophage) | CSF2RB  |
| 203989_x_at | -1.2      | coagulation factor II (thrombin) receptor                                         | F2R     |
| 209894_at   | -1.2      | leptin receptor short form                                                        | db      |
| 205926_at   | -1.2      | class I cytokine receptor                                                         | WSX-1   |
| 209822_s_at | -1.3      | very low density lipoprotein receptor                                             | VLDLR   |
| 213193_x_at | -1.3      | T cell receptor beta locus                                                        | TRB@    |
| 217033_x_at | -1.4      | neurotrophic tyrosine kinase, receptor, type 3                                    | trkC    |
| 212588_at   | -1.4      | mRNA for T200 leukocyte common antigen (CD45, LC-A).                              | PTPRC   |
| 216837_at   | -1.4      | receptor protein-tyrosine kinase                                                  | HEK7    |
| 211846_s_at | -1.4      | herpesvirus immunoglobulin-like receptor HlgR                                     | PVRL1   |
| 221464_at   | -1.7 -2   | olfactory receptor, family 1, subfamily D, member 2                               | OR1D2   |
| 214515_at   | -1.7      | olfactory receptor, family 1, subfamily E, member 1                               | OR1E1   |
| 221451_s_at | -1.5      | olfactory receptor, family 2, subfamily W, member 1                               | OR2W1   |
| 215770_at   | -4.6      | olfactory receptor, family 7, subfamily E, member 2 pseudogene                    | OR7E2P  |
| 215463_at   | -1.4      | olfactory receptor, family 7, subfamily E, member 24 pseudogene                   | OR7E24P |
| 208520_at   | -1.8      | olfactory receptor, family 10, subfamily H, member 3                              | OR10H3  |
| 216408_at   | -1.8      | 6M1-10*01 gene for olfactory receptor, cell line BM28.7                           |         |
| 207633_s_at | -1.5      | muscle, skeletal, receptor tyrosine kinase                                        | MUSK    |
| 217060_at   | -1.6      | V beta T-cell receptor gene locus                                                 | TCRBV   |
| 217484_at   | -1.7      | complement component (3b4b) receptor 1, including Knops blood group system        | CR1     |
| 205209_at   | 1.1       | activin A receptor, type IB                                                       | ACVR1B  |



|             |      |      |                                                                                         |          |
|-------------|------|------|-----------------------------------------------------------------------------------------|----------|
| 205945_at   |      | 1    | interleukin 6 receptor                                                                  | IL6R     |
| 207840_at   |      | -1.3 | natural killer cell receptor, immunoglobulin superfamily member                         | BY55     |
| 203749_s_at |      | -1.3 | retinoic acid receptor, alpha                                                           | RARA     |
| 214866_at   |      | -1.3 | mRNA for urokinase plasminogen activator receptor                                       | PLAUR    |
| 217028_at   |      | -1.7 | chemokine (C-X-C motif), receptor 4 (fusin)                                             | CXCR4    |
| 209354_at   |      | -1.8 | tumor necrosis factor receptor superfamily, member 14 (herpesvirus entry mediator)      | TNFRSF14 |
| 211837_s_at |      | -2.9 | pre-T-cell receptor alpha chain                                                         | PTA      |
| 214770_at   |      | -3.3 | macrophage scavenger receptor 1                                                         | MSR1     |
| 213880_at   | -1.6 | -2   | G protein-coupled receptor 49                                                           | GPR49    |
| 212070_at   | -1.2 |      | G protein-coupled receptor 56                                                           | GPR56    |
| 221394_at   | -1.6 |      | G protein-coupled receptor 58                                                           | GPR58    |
| 206002_at   | -2.1 | -2.3 | G protein-coupled receptor 64                                                           | GPR64    |
| 219936_s_at |      | 1.3  | G protein-coupled receptor 87                                                           | GPR87    |
| 214506_at   | -1.3 |      | G-protein coupled receptor similar to theadrenomedullin receptor                        | ADMR     |
| 219789_at   |      | 1.4  | natriuretic peptide receptor Cguanylate cyclase C (atrionatriuretic peptide receptor C) | NP3      |
| 210412_at   | -1.8 |      | Human N-methyl-D-aspartate receptor subunit NR3 (hNR3) mRNA, complete cds.              | NR3      |
| 210832_x_at | -1.5 |      | prostaglandin E receptor EP3 subtype 1b isoform                                         | PTGER3   |
| 210374_x_at | -1   |      | prostaglandin E receptor EP3 subtype 4 isoform                                          | PTGER3   |
| 210055_at   |      | -4.6 | thyroid stimulating hormone receptor                                                    | TSHR     |
| 210729_at   | -3.7 |      | Human type 2 neuropeptide Y receptor mRNA, complete cds.                                | NPY2R    |
| 213436_at   | -1.4 |      | cannabinoid receptor 1 (brain)                                                          | CNR1     |
| 206346_at   | -1.1 |      | prolactin receptor                                                                      | PRLR     |
| 219282_s_at | -1.2 |      | vanilloid receptor-like protein 1                                                       | VRL-1    |
| 202820_at   | -1   |      | aryl hydrocarbon receptor                                                               | AHR      |
| 221107_at   | -1.2 |      | cholinergic receptor, nicotinic, alphapolypeptide 9                                     | CHRNA9   |
| 201591_s_at |      | -1.2 | imidazoline receptor candidate                                                          | I-1      |
| 209866_s_at | -1.2 |      | KIAA0768 protein                                                                        | KIAA0768 |

*solute carrier family proteins*

|             |      |      |                                                                               |         |
|-------------|------|------|-------------------------------------------------------------------------------|---------|
| 203580_s_at |      | -1.2 | solute carrier family 7 (cationic amino acidtransporter, y+ system), member 6 | SLC7A6  |
| 206143_at   |      | -4.7 | down-regulated in adenoma protein                                             | SLC26A3 |
| 206529_x_at | -1.2 |      | pendrin                                                                       | SLC26A4 |
| 201802_at   | 1.3  |      | solute carrier family 29 (nucleosidetransporters), member 1                   | SLC29A1 |

*Other Transmembrane/ Cell Surface Proteins*

|             |      |      |                                                                                 |          |
|-------------|------|------|---------------------------------------------------------------------------------|----------|
| 207291_at   |      | 1.1  | transmembrane gamma-carboxyglutamic acid protein 4                              | TIMG4    |
| 207847_s_at |      | -1   | mucin 1, transmembrane                                                          | MUC1     |
| 217117_x_at |      | -1.3 | mucin                                                                           | MUC3     |
| 208349_at   |      | -1.1 | ankyrin-like with transmembrane domains 1                                       | ANKTM1   |
| 220205_at   |      | -1.6 | transmembrane phosphatase with tensin homology                                  | TPTE     |
| 203824_at   |      | -1.7 | transmembrane 4 superfamily member 3                                            | TM4SF3   |
| 209263_x_at |      | -1.8 | transmembrane 4 superfamily member 7                                            | TM4SF7   |
| 204808_s_at |      | 1.4  | transmembrane protein 5                                                         | TMEM5    |
| 205122_at   |      | -1.2 | transmembrane protein with EGF-like and two follistatin-like domains 1          | TMEFF1   |
| 220454_s_at |      | -1.4 | sema domain, transmembrane domain (TM), and cytoplasmic domain, (semaphorin) 6A | SEMA6A   |
| 209498_at   |      | -1.8 | mRNA for transmembrane carcinoembryonic antigen BGPa (formerly TM1-CEA)         | CEACAM1  |
| 214606_at   | -1.3 |      | tetraspan 2                                                                     | TSPAN-2  |
| 200973_s_at |      | 1.2  | tetraspan 3                                                                     | TSPAN-3  |
| 203456_at   |      | -3.4 | JM4 protein                                                                     | JM4      |
| 214594_x_at | -1.3 |      | ATPase, Class I, type 8B, member 1                                              | ATP8B1   |
| 214934_at   |      | -1.2 | ATPase, Class II, type 9B                                                       | ATP9B    |
| 214255_at   |      | -1.8 | ATPase, Class V, type 10C                                                       | ATP10C   |
| 221898_at   |      | 1    | lung type-I cell membrane-associated glycoprotein                               | T1A-2    |
| 201195_s_at |      | 1    | Homo sapiens mRNA for L-type amino acid transporter 1, complete cds.            | hLAT1    |
| 219025_at   | -1.2 |      | tumor endothelial marker 1 precursor                                            | TEM1     |
| 214650_x_at | -1.4 |      | myelin oligodendrocyte glycoprotein                                             | MOG      |
| 31835_at    | -1.4 |      | Human histidine-rich glycoprotein mRNA, complete cds                            |          |
| 218625_at   | -1.4 |      | neuritin                                                                        | LOC51299 |
| 211373_s_at |      | -2.1 | seven trans-membrane domain protein AD3LPAD5                                    | AD3LPAD5 |
| 219643_at   |      | -2.1 | low density lipoprotein-related protein 1B (deleted in tumors)                  | LRP1B    |
| 205674_x_at |      | -1.3 | FXYP domain-containing ion transport regulator2, isoform 1                      | FXYP2    |

*Antigens*

|             |      |      |                                                            |         |
|-------------|------|------|------------------------------------------------------------|---------|
| 204055_s_at |      | -2   | meningioma expressed antigen 6 (coiled-coil proline-rich)  | MGEA6   |
| 206218_at   |      | -1.6 | melanoma antigen, family B, 2                              | MAGEB2  |
| 206276_at   |      | 2    | lymphocyte antigen 6 complex, locus D                      | E48     |
| 218715_at   |      | 1    | hepatocellular carcinoma-associated antigen 66             | HCA66   |
| 205668_at   |      | -1   | lymphocyte antigen 75                                      | LY75    |
| 210325_at   |      | -1   | thymocyte antigen CD1a                                     | CD1a    |
| 206816_s_at |      | -1.1 | sperm associated antigen 8                                 | SPAG8   |
| 212468_at   |      | -1.2 | sperm associated antigen 9                                 | SPAG9   |
| 207198_s_at |      | -1.3 | LIM and senescent cell antigen-like domains 1              | LIMS1   |
| 209719_x_at |      | -1.3 | squamous cell carcinoma antigen 1                          | SCCA1   |
| 201005_at   |      | 1.9  | CD9 antigen (p24)                                          | CD9     |
| 211189_x_at | -1.4 |      | leukocyte differentiation antigen CD84 isoform CD84a       | CD84    |
| 208650_s_at | -1.5 | -1.1 | CD24 antigen (small cell lung carcinoma cluster 4 antigen) | CD24    |
| 209771_x_at | -1.8 | -1.6 | CD24 antigen (small cell lung carcinoma cluster 4 antigen) | CD24    |
| 266_s_at    | -1.9 | -1.5 | CD24 signal transducer                                     |         |
| 208651_x_at | -1.8 |      | signal transducer CD24                                     | CD24    |
| 216379_x_at | -1.8 | -1.6 | CD24 signal transducer                                     |         |
| 206545_at   | -1.6 |      | CD28 antigen (Tp44)                                        | CD28    |
| 203416_at   | -1.6 |      | CD53 antigen                                               | CD53    |
| 207176_s_at | -1.6 |      | CD80 antigen (CD28 antigen ligand 1, B7-1 antigen)         | CD80    |
| 210413_x_at | -1.6 |      | squamous cell carcinoma antigen 2                          | SCCA2   |
| 212607_at   | -1.8 |      | serologically defined colon cancer antigen 8               | SDCCAG8 |
| 207437_at   |      | -2.1 | neuro-oncological ventral antigen 1                        | NOVA1   |

|                                                                |      |      |                                                                                                                                                                                     |               |
|----------------------------------------------------------------|------|------|-------------------------------------------------------------------------------------------------------------------------------------------------------------------------------------|---------------|
| 205794_s_at                                                    | -1.8 | -1.6 | neuro-oncological ventral antigen 1                                                                                                                                                 | NOVA1         |
| 201644_at                                                      |      | 3    | tissue specific transplantation antigen P35B                                                                                                                                        | TSTA3         |
| 200598_s_at                                                    |      | 2.3  | tumor rejection antigen (gp96) 1                                                                                                                                                    | TRA1          |
| 212022_s_at                                                    |      | 2    | antigen identified by monoclonal antibody Ki-67                                                                                                                                     | Ki-67         |
| 211744_s_at                                                    |      | 1.5  | Similar to CD58 antigen, (lymphocyte function-associated antigen 3)                                                                                                                 |               |
| 217523_at                                                      |      | 1.2  | Moderately similar to CD44_HUMAN CD44 ANTIGEN PRECURSOR                                                                                                                             | ETS           |
| 220957_at                                                      | -1.6 |      | CTAGE-1 protein                                                                                                                                                                     | CTAGE-1       |
| 203996_s_at                                                    |      | -1.1 | chromosome 21 open reading frame 2                                                                                                                                                  | C21ORF2       |
| 216213_at                                                      | -1.4 |      | Homo sapiens NY-REN-55 antigen mRNA, partial cds.                                                                                                                                   | NEK1          |
| 211657_at                                                      |      | -1.5 | non-specific cross reacting antigen                                                                                                                                                 | NCA           |
| 211906_s_at                                                    |      | -1.6 | SCCA2b                                                                                                                                                                              | SCCA2         |
| 207483_s_at                                                    |      | 1.1  | TIP120 protein                                                                                                                                                                      | TIP120        |
| 201138_s_at                                                    |      | 1.3  | Sjogren syndrome antigen B (autoantigen La)                                                                                                                                         | SSB           |
| <i>Major Histocompatibility Complex and Antigen Presenting</i> |      |      |                                                                                                                                                                                     |               |
| 211911_x_at                                                    | 1.1  |      | MHC class I HLA B71                                                                                                                                                                 | HLA-B         |
| 217456_x_at                                                    |      | 1.1  | MHC class I HLA-B51                                                                                                                                                                 | HLA-B         |
| 208729_x_at                                                    | 2.4  |      | major histocompatibility complex, class I, B                                                                                                                                        | HLA-B         |
| 209140_x_at                                                    | 1    | 2    | MHC HLA-B39                                                                                                                                                                         | HLA-B39       |
| 214459_x_at                                                    |      | 1.1  | Cw1 antigen mRNA                                                                                                                                                                    | HLA-C         |
| 211799_x_at                                                    | 2.9  |      | HLA class I heavy chain                                                                                                                                                             | HLA-Cw*1701   |
| 203932_at                                                      | -1   |      | major histocompatibility complex, class II, DM beta                                                                                                                                 | HLA-DMB       |
| 221491_x_at                                                    | -2   |      | major histocompatibility complex, class II, DR beta 3                                                                                                                               | HLA-DRB3      |
| 208306_x_at                                                    | -1   |      | major histocompatibility complex, class II, DR beta 4                                                                                                                               | HLA-DRB4      |
| 200905_x_at                                                    |      | 1    | major histocompatibility complex, class I, E                                                                                                                                        | HLA-E         |
| 200904_at                                                      |      | 1.6  | major histocompatibility complex, class I, E                                                                                                                                        | HLA-E         |
| 200041_s_at                                                    | 1.7  | 1    | HLA-B associated transcript-1                                                                                                                                                       | D6S81E        |
| 212384_at                                                      |      | 1    | HLA-B associated transcript-1                                                                                                                                                       | D6S81E        |
| 203712_at                                                      | 1.1  |      | KIAA0020 gene product                                                                                                                                                               | KIAA0020      |
| 35974_at                                                       | 1    |      | Human lymphoid-restricted membrane protein (Jaw1) mRNA, complete cds                                                                                                                |               |
| <i>Cell Adhesion</i>                                           |      |      |                                                                                                                                                                                     |               |
| 201952_at                                                      |      | -1.6 | activated leucocyte cell adhesion molecule                                                                                                                                          | ALCAM         |
| 201884_at                                                      | -1.6 |      | carcinoembryonic antigen-related cell adhesion molecule 5                                                                                                                           | CEACAM5       |
| 204584_at                                                      |      | -2.5 | L1 cell adhesion molecule (hydrocephalus, stenosis of aqueduct of Sylvius 1, MASA (mental retardation, aphasia, shuffling gait and adducted thumbs) syndrome, spastic paraplegia 1) | L1CAM         |
| 211340_s_at                                                    | -1   | -1.5 | MUC18 glycoprotein mRNA                                                                                                                                                             | MCAM          |
| 205669_at                                                      | -1.5 |      | neural cell adhesion molecule 2                                                                                                                                                     | NCAM2         |
| 216959_x_at                                                    | -1.1 |      | neuronal cell adhesion molecule / hBRAVONr-CAM precursor (hBRAVONr-CAM) gene                                                                                                        | NRCAM         |
| 203868_s_at                                                    | -1.2 |      | vascular cell adhesion molecule 1                                                                                                                                                   | VCAM1         |
| 206049_at                                                      | -1.8 |      | selectin P (granule membrane protein 140kD, antigen CD62)                                                                                                                           | SELP          |
| 213325_at                                                      |      | -1.8 | nectin 3                                                                                                                                                                            | DKFZP566B0846 |
| 214705_at                                                      |      | 1.2  | Homo sapiens mRNA for PDZ domain protein                                                                                                                                            | INADL         |
| 211701_s_at                                                    | -1.3 | -1.3 | magphinin beta                                                                                                                                                                      | TRO           |
| <i>Desmosomal Proteins</i>                                     |      |      |                                                                                                                                                                                     |               |
| 204750_s_at                                                    |      | 1.8  | desmocollin 2                                                                                                                                                                       | DSC2          |
| 206642_at                                                      |      | 1.4  | desmoglein 1 preproprotein                                                                                                                                                          | DSG1          |
| 207717_s_at                                                    | -1.8 |      | plakophilin 2                                                                                                                                                                       | PKP2          |
| 201927_s_at                                                    |      | 4.2  | plakophilin 4                                                                                                                                                                       | PKP4          |
| <i>Integrins</i>                                               |      |      |                                                                                                                                                                                     |               |
| 206766_at                                                      | -1.1 | -1.4 | integrin alpha 10 subunit                                                                                                                                                           | ITGA10        |
| 201124_at                                                      | -1.1 |      | integrin, beta 5                                                                                                                                                                    | ITGB5         |
| 201125_s_at                                                    |      | -1   | integrin, beta 5                                                                                                                                                                    | ITGB5         |
| <i>heparan sulfate proteoglycans</i>                           |      |      |                                                                                                                                                                                     |               |
| 202071_at                                                      |      | 1    | syndecan 4 (amphiglycan, ryudocan)                                                                                                                                                  | SDC4          |
| <i>Collagens</i>                                               |      |      |                                                                                                                                                                                     |               |
| 202311_s_at                                                    |      | -2   | collagen, type I, alpha 1                                                                                                                                                           | COL1A1        |
| 202403_s_at                                                    | -1.3 | -2   | collagen, type I, alpha 2                                                                                                                                                           | COL1A2        |
| 202404_s_at                                                    |      | -3.7 | collagen, type I, alpha 2                                                                                                                                                           | COL1A2        |
| 211161_s_at                                                    | -1   |      | PRO3121                                                                                                                                                                             | COL3A1        |
| 211980_at                                                      | -1.9 | -1.2 | collagen, type IV, alpha 1                                                                                                                                                          | COL4A1        |
| 211343_s_at                                                    |      | -1.8 | (clones HT-(125,133)) alpha-2 type IV collagen                                                                                                                                      | COL4A2        |
| 216368_s_at                                                    | -1   |      | collagen type IV alpha 3                                                                                                                                                            | COL4A3        |
| 203325_s_at                                                    |      | -1.1 | collagen, type V, alpha 1                                                                                                                                                           | COL5A1        |
| 213428_s_at                                                    |      | -1.1 | collagen, type VI, alpha 1                                                                                                                                                          | COL6A1        |
| 213622_at                                                      | -1.5 | -1.6 | collagen, type IX, alpha 2                                                                                                                                                          | COL9A2        |
| 37892_at                                                       |      | -3.7 | alpha-1 type XI collagen                                                                                                                                                            | COL11A1       |
| 216993_s_at                                                    | -1   |      | collagen, type XI, alpha 2                                                                                                                                                          | COL11A2       |
| 212865_s_at                                                    | -1.3 | -1.1 | collagen, type XIV, alpha 1 (undulin)                                                                                                                                               | COL14A1       |
| 204636_at                                                      |      | 2.2  | collagen, type XVII, alpha 1                                                                                                                                                        | COL17A1       |
| <i>Cadherins</i>                                               |      |      |                                                                                                                                                                                     |               |
| 207173_x_at                                                    | -1.8 | -2.4 | mRNA for OB-cadherin-1                                                                                                                                                              | osf-4         |
| 209079_x_at                                                    | -1   |      | protocadherin gamma A1                                                                                                                                                              | PCDH-gamma-A1 |
| 205717_x_at                                                    | -1   |      | protocadherin gamma subfamily C, 3                                                                                                                                                  | PCDHGC3       |
| 206935_at                                                      |      | -1.8 | protocadherin 8                                                                                                                                                                     | PCDH8         |
| 205656_at                                                      | -1   |      | protocadherin 17                                                                                                                                                                    | PCDH17        |

|                                           |      |      |                                                                                                                                                                |          |
|-------------------------------------------|------|------|----------------------------------------------------------------------------------------------------------------------------------------------------------------|----------|
| 220115_s_at                               | -1.7 | -1.2 | cadherin 10, type 2 (T2-cadherin)                                                                                                                              | CDH10    |
| 206898_at                                 | -1.6 |      | cadherin 19, type 2                                                                                                                                            | CDH19    |
| <i>Tight Junctions</i>                    |      |      |                                                                                                                                                                |          |
| 202085_at                                 |      | 1.1  | tight junction protein 2 (zona occludens 2)                                                                                                                    | TJP2     |
| <i>Channel Related</i>                    |      |      |                                                                                                                                                                |          |
| 212038_s_at                               |      | 1.9  | voltage-dependent anion channel 1                                                                                                                              | VDAC1    |
| 217140_s_at                               | 1.6  |      | voltage-dependent anion channel 1 pseudogene                                                                                                                   | VDAC1P   |
| 208846_s_at                               | 1.3  |      | voltage dependent anion channel form 3                                                                                                                         | VDAC3    |
| 214933_at                                 |      | -1.4 | calcium channel, voltage-dependent, PQ type, alpha 1A subunit                                                                                                  | CACNA1A  |
| 213714_at                                 | 1.1  |      | calcium channel, voltage-dependent, beta 2 subunit                                                                                                             | CACNB2   |
| 208578_at                                 | -1.4 |      | sodium channel, voltage-gated, type X, alpha polypeptide                                                                                                       | SCN10A   |
| 210853_at                                 | -1   |      | voltage-gated sodium channel alpha subunit, alternate splice variant SCN12A-s                                                                                  | SCN12A   |
| 203402_at                                 |      | -1.3 | potassium voltage-gated channel, shaker-related subfamily, beta member 2                                                                                       | KCNAB2   |
| 220776_at                                 | -1.1 |      | potassium inwardly-rectifying channel, subfamily J, member 14                                                                                                  | KCNJ14   |
| 219883_at                                 | -1.3 |      | potassium inwardly-rectifying channel, subfamily K, member 4                                                                                                   | KCNK4    |
| 218084_x_at                               | -1.4 |      | FXYD domain-containing ion transport regulator 5                                                                                                               | FXYD5    |
| 205803_s_at                               | -2.1 |      | transient receptor potential channel 1                                                                                                                         | TRPC1    |
| 206165_s_at                               |      | 1.7  | calcium activated chloride channel 2 precursor                                                                                                                 | CLCA2    |
| 201732_s_at                               |      | 3.8  | chloride channel protein 3                                                                                                                                     | CLCN3    |
| 38069_at                                  |      | -1.3 | mRNA for CLC-7 chloride channel protein                                                                                                                        |          |
| 208659_at                                 |      | 1.6  | chloride channel ABP                                                                                                                                           | CLIC1    |
| <b>Multi Drug Resistance Transporters</b> |      |      |                                                                                                                                                                |          |
| 208635_x_at                               |      | 1.9  | ATP-binding cassette, sub-family B (MDRTAP), member 2                                                                                                          | ABCB2    |
| 208161_s_at                               |      | -1.1 | Homo sapiens ATP-binding cassette, sub-family C (CFTRMRP), member 3 (ABCC3), transcript variant MRP3A, mRNA.                                                   | ABCC3    |
| 203981_s_at                               |      | 1.8  | ATP-binding cassette, sub-family D (ALD), member 4                                                                                                             | ABCD4    |
| <b>Extracellular Matrix</b>               |      |      |                                                                                                                                                                |          |
| 211985_s_at                               |      | 1.1  | matrix Gla protein                                                                                                                                             | MGP      |
| 206580_s_at                               |      | -1.2 | EGF-containing fibulin-like extracellular matrix protein 2                                                                                                     | EFEMP2   |
| 213993_at                                 |      | -3.9 | spondin 1, (f-spondin) extracellular matrix protein                                                                                                            | SPON1    |
| 207289_at                                 |      | -1.3 | matrix metalloproteinase-like 1                                                                                                                                | MMPL1    |
| 203936_s_at                               |      | -1.5 | matrix metalloproteinase 9 (gelatinase B, 92kD gelatinase, 92kD type IV collagenase)                                                                           | MMP9     |
| 214913_at                                 |      | -1.5 | a disintegrin-like and metalloprotease (repolysin type) with thrombospondin type 1 motif, 3                                                                    | KIAA0366 |
| 219935_at                                 |      | -1.6 | a disintegrin-like and metalloprotease (repolysin type) with thrombospondin type 1 motif, 5 (aggrecanase-2)                                                    | ADAMTS5  |
| 220287_at                                 |      | -1.3 | disintegrin and metalloproteinase with thrombospondin motifs-9 preproprotein                                                                                   | ADAMTS9  |
| 207665_at                                 |      | -1.3 | a disintegrin and metalloproteinase domain 21                                                                                                                  | ADAM21   |
| 207165_at                                 |      | 2.1  | 1.6 hyaluronan-mediated motility receptor (RHAMM), transcript variant 2                                                                                        | HMMR     |
| 209709_s_at                               |      | 1.4  | hyaluronan receptor                                                                                                                                            | RHAMM    |
| 206010_at                                 |      | -1.3 | hyaluronan-binding protein 2                                                                                                                                   | HABP2    |
| 203184_at                                 |      | -1   | fibrillin 2 (congenital contractural arachnodactyly)                                                                                                           | FBN2     |
| 206134_at                                 |      | -1.2 | disintegrin protease                                                                                                                                           | M12.219  |
| 221731_x_at                               |      | -1.5 | chondroitin sulfate proteoglycan 2 (versican)                                                                                                                  | CSPG2    |
| 204620_s_at                               |      | -2   | 1.4 chondroitin sulfate proteoglycan 2 (versican)                                                                                                              | CSPG2    |
| 200795_at                                 |      | -1.7 | SPARC-like 1 (mast9, hevyn)                                                                                                                                    | SPARCL1  |
| 219087_at                                 |      | 1.9  | 2.2 asporin (LRR class 1)                                                                                                                                      | ASPN     |
| 204614_at                                 |      | 1    | serine (or cysteine) proteinase inhibitor, clade B (ovalbumin), member 2                                                                                       | SERPINB2 |
| 209720_s_at                               |      | -1.6 | serine (or cysteine) proteinase inhibitor, clade B (ovalbumin), member 3                                                                                       | SERPINB3 |
| 206421_s_at                               |      | 1.8  | 4 serine (or cysteine) proteinase inhibitor, clade B (ovalbumin), member 7                                                                                     | SERPINB7 |
| 200986_at                                 |      | -1   | complement component 1 inhibitor precursor                                                                                                                     | SERPING1 |
| 205352_at                                 |      | -1.2 | protease inhibitor 12 (neuroserpin)                                                                                                                            | SERPIN1  |
| 200654_at                                 |      | 4.8  | procollagen-proline, 2-oxoglutarate 4-dioxygenase (proline 4-hydroxylase), beta polypeptide (protein disulfide isomerase; thyroid hormone binding protein p55) | P4HB     |
| 219625_s_at                               |      | 2.4  | collagen, type IV, alpha 3 (Goodpasture antigen) binding protein                                                                                               | COL4A3BP |
| 201666_at                                 |      | 1.4  | tissue inhibitor of metalloproteinase 1 (erythroid potentiating activity, collagenase inhibitor)                                                               | TIMP1    |
| 216250_s_at                               |      | -1.3 | laminin, alpha 3 (nicein (150kD), kalinin (165kD), BM600 (150kD), epilegrin)                                                                                   | LAMA3    |
| 202202_s_at                               |      | -1.4 | laminin, alpha 4 precursor                                                                                                                                     | LAMA4    |
| 215516_at                                 |      | 2    | laminin, beta 4                                                                                                                                                | LAMB4    |
| 206400_at                                 |      | 1.8  | lectin, galactoside-binding, soluble, 7 (galectin 7)                                                                                                           | LGALS7   |
| 208934_s_at                               |      | 1.4  | colorectal carcinoma-derived galectin-8 variant I                                                                                                              | LGALS8   |
| 210731_s_at                               |      | -1.2 | lectin, galactoside-binding, soluble, 8 (galectin 8)                                                                                                           | LGALS8   |
| 204736_s_at                               |      | -2.1 | melanoma-associated chondroitin sulfate proteoglycan 4                                                                                                         | CSPG4    |
| 214297_at                                 |      | -2.1 | chondroitin sulfate proteoglycan 4 (melanoma-associated)                                                                                                       | CSPG4    |
| 202709_at                                 |      | -1   | fibromodulin precursor                                                                                                                                         | FMOD     |
| 204987_at                                 |      | -1.9 | inter-alpha (globulin) inhibitor, H2 polypeptide                                                                                                               | ITIH2    |
| 217161_x_at                               |      | -1.5 | cartilage specific proteoglycan (600 AA)                                                                                                                       | AGC1     |
| 209396_s_at                               |      | -2.6 | Human glycoprotein mRNA, complete cds                                                                                                                          | CHI3L1   |
| 202363_at                                 |      | -1.3 | testican-1                                                                                                                                                     | SPOCK    |
| 209395_at                                 |      | -1.5 | glycoprotein                                                                                                                                                   | CHI3L1   |
| 209732_at                                 |      | 1.4  | Similar to C-type (calcium dependent, carbohydrate-recognition domain) lectin, superfamily member 2 (activation-induced)                                       | CLECSF2  |
| 205871_at                                 |      | -1.4 | Similar to plasminogen                                                                                                                                         | PLGL     |
| <b>Cytoskeleton</b>                       |      |      |                                                                                                                                                                |          |
| 213515_x_at                               |      | -1.9 | myosin, light polypeptide 4, alkali; atrial, embryonic                                                                                                         | MYL4     |
| 205144_at                                 |      | -1.5 | regulatory myosin light chain                                                                                                                                  | MYL5     |
| 212372_at                                 |      | -1.1 | Homo sapiens cDNA: FLJ23324 fis, clone HEP12482, highly similar to HUMMYOHC                                                                                    |          |
|                                           |      |      | Human nonmuscle myosin heavy chain-B (MYH10) mRNA.                                                                                                             |          |
| 203215_s_at                               |      | 2.8  | myosin VI                                                                                                                                                      | MYO6     |
| 220288_at                                 |      | -1.1 | myosin XV                                                                                                                                                      | MYO15    |

|                                 |      |                                                                                          |                                                                                    |          |
|---------------------------------|------|------------------------------------------------------------------------------------------|------------------------------------------------------------------------------------|----------|
| 220319_s_at                     | 1.1  |                                                                                          | myosin regulatory light chain interacting protein                                  | MIR      |
| 206891_at                       | -1.1 |                                                                                          | skeletal muscle specific actinin, alpha 3                                          | ACTN3    |
| 200728_at                       | 2    |                                                                                          | ARP2 (actin-related protein 2, yeast) homolog                                      | ACTR2    |
| 200996_at                       | 1.8  |                                                                                          | ARP3 (actin-related protein 3, yeast) homolog                                      | ACTR3    |
| 211995_x_at                     | 1.4  |                                                                                          | actin, gamma 1                                                                     | ACTG1    |
| 212363_x_at                     | 1    |                                                                                          | actin, gamma 1                                                                     | ACTG1    |
| 208679_s_at                     | 2.2  |                                                                                          | Homo sapiens PNAS-139 mRNA, complete cds.                                          | ARPC2    |
| 209344_at                       | 4.3  |                                                                                          | tropomyosin 4                                                                      | TPM4     |
| 200696_s_at                     | -1   |                                                                                          | gelsolin (amyloidosis, Finnish type)                                               | GSN      |
| 214331_at                       | 2.7  |                                                                                          | advillin                                                                           | AVIL     |
| 218252_at                       | 1    |                                                                                          | cytoskeleton associated protein 2                                                  | CKAP2    |
| 204444_at                       | 1.2  |                                                                                          | kinesin-like 1                                                                     | KNSL1    |
| 219306_at                       | 1.3  |                                                                                          | kinesin-like protein 2                                                             | hklp2    |
| 204709_s_at                     | 1.4  |                                                                                          | kinesin-like 5 (mitotic kinesin-like protein 1)                                    | KNSL5    |
| 218755_at                       | 1.2  |                                                                                          | RAB6 interacting, kinesin-like (rabkinesin6)                                       | RAB6KIFL |
| 210527_x_at                     | 2.7  |                                                                                          | alpha-tubulin                                                                      | TUBA2    |
| 209118_s_at                     | -1.1 |                                                                                          | hum-a-tub2 alpha-tubulin mRNA                                                      | TUBA3    |
| 214023_x_at                     | -1.5 |                                                                                          | tubulin, beta polypeptide                                                          | TUBB     |
| 213476_x_at                     | 3.2  |                                                                                          | tubulin, beta, 4                                                                   | TUBB4    |
| 203894_at                       | -1.1 |                                                                                          | tubulin, gamma 2                                                                   | TUBG2    |
| 213266_at                       | -1.3 |                                                                                          | gamma tubulin ring complex protein (76p gene)                                      | 76P      |
| 201975_at                       | -1   |                                                                                          | restin (Reed-Steinberg cell-expressed intermediate filament-associated protein)    | RSN      |
| 207780_at                       | -1.4 |                                                                                          | cylicin, basic protein of sperm head cytoskeleton 2                                | CYLC2    |
| 213201_s_at                     | 3.5  |                                                                                          | troponin T1, skeletal, slow                                                        | TNNT1    |
| 206393_at                       | 1.4  |                                                                                          | troponin 1, skeletal, fast                                                         | TNNI2    |
| 217234_s_at                     | 3.3  |                                                                                          | cytovillin 2                                                                       | VIL2     |
| 210461_s_at                     | 1.2  | Homo sapiens, Similar to actin binding LIM protein 1, clone MGC:1224, mRNA, complete cds |                                                                                    | ABLIM    |
| 201615_x_at                     | 1.2  |                                                                                          | caldesmon 1                                                                        | CALD1    |
| 200906_s_at                     | 1.1  |                                                                                          | palladin                                                                           | KIAA0992 |
| 213371_at                       | -1.5 |                                                                                          | Z-band alternatively spliced PDZ-motif                                             | ZASP     |
| 206807_s_at                     | -1.2 |                                                                                          | adducin 2, isoform b                                                               | ADD2     |
| 205882_x_at                     | 1.7  |                                                                                          | adducin 3 (gamma)                                                                  | ADD3     |
| 201752_s_at                     | 1.3  |                                                                                          | adducin 3 (gamma)                                                                  | ADD3     |
| 217892_s_at                     | 1.6  |                                                                                          | epithelial protein lost in neoplasm beta                                           | EPLIN    |
| 205399_at                       | -1.6 |                                                                                          | doublecortin and CaM kinase-like 1                                                 | DCAMKL1  |
| 202806_at                       | -1.5 |                                                                                          | drebrin 1                                                                          | DBN1     |
| 221748_s_at                     | -1.3 |                                                                                          | tensin                                                                             | TSN      |
| 203243_s_at                     | 1.1  |                                                                                          | LIM protein (similar to rat protein kinaseC-binding enigma)                        | LIM      |
| 214174_s_at                     | -1.1 |                                                                                          | LIM domain protein                                                                 | RIL      |
| 221236_s_at                     | -1.2 |                                                                                          | stathmin-like-protein RB3                                                          | RB3      |
| 207724_s_at                     | -1.5 |                                                                                          | spastin                                                                            | SPG4     |
| 212551_at                       | -1.4 |                                                                                          | adenylyl cyclase-associated protein 2                                              | CAP2     |
| <i>Neurofilaments</i>           |      |                                                                                          |                                                                                    |          |
| 221805_at                       | -1.3 |                                                                                          | neurofilament, light polypeptide (68kD)                                            | NEFL     |
| 205113_at                       | -2.2 |                                                                                          | neurofilament 3 (150kD medium)                                                     | NEF3     |
| 204465_s_at                     | -1.3 |                                                                                          | internexin neuronal intermediate filament protein, alpha                           | INA      |
| <i>Vimentinlike Proteins</i>    |      |                                                                                          |                                                                                    |          |
| 201426_s_at                     | -1.7 |                                                                                          | vimentin                                                                           | VIM      |
| <i>Keratins</i>                 |      |                                                                                          |                                                                                    |          |
| 207908_at                       | -1.1 |                                                                                          | keratin 2A (epidermal ichthyosis bullosa of Siemens)                               | KRT2A    |
| 213240_s_at                     | -2.2 |                                                                                          | mRNA for cytokeratin 4 C-terminal region                                           | KRT4     |
| 201820_at                       | 1    |                                                                                          | keratin 5 (epidermolysis bullosa simplex, Dowling-MearaKobnerWeber-Cockayne types) | KRT5     |
| 209126_x_at                     | 1    |                                                                                          | keratin 6 isoform K6f                                                              | KRT6F    |
| 207716_at                       | -1.4 |                                                                                          | keratin, hair, acidic, 8                                                           | KRTHA8   |
| 204734_at                       | 1.2  |                                                                                          | keratin 15                                                                         | KRT15    |
| <b>Related to Immune System</b> |      |                                                                                          |                                                                                    |          |
| 212764_at                       | -1.1 |                                                                                          | transcription factor 8 (represses interleukin 2 expression)                        | TCF8     |
| 208930_s_at                     | 1.7  |                                                                                          | interleukin enhancer binding factor 3, 90kD                                        | ILF3     |
| 204863_s_at                     | 1.7  |                                                                                          | interleukin 6 signal transducer (gp130, oncostatin M receptor)                     | IL6ST    |
| 207315_at                       | -2.2 |                                                                                          | adhesion glycoprotein                                                              | DNAM-1   |
| 204777_s_at                     | -2   | -1.2                                                                                     | T-cell differentiation protein MAL, isoform a                                      | MAL      |
| 823_at                          | -1   |                                                                                          | Human CX3C chemokine precursor, mRNA, alternatively spliced, complete cds          |          |
| 221963_x_at                     | -1.1 |                                                                                          | thrombospondin 1                                                                   | THBS1    |
| 201110_s_at                     | -2.3 | -1.9                                                                                     | thrombospondin 1                                                                   | THBS1    |
| 215775_at                       | -1.3 |                                                                                          | Human thrombospondin-1 gene, partial cds                                           |          |
| 202510_s_at                     | -1   |                                                                                          | tumor necrosis factor, alpha-induced protein 2                                     | TNFAIP2  |
| 206181_at                       | -1.2 |                                                                                          | signaling lymphocytic activation molecule                                          | SLAM     |
| 214617_at                       | -1.6 |                                                                                          | perforin 1 (pore forming protein)                                                  | PRF1     |
| 205863_at                       | -1.9 |                                                                                          | S100 calcium-binding protein A12                                                   | S100A12  |
| 209447_at                       | 1.2  |                                                                                          | lymphocyte membrane associated protein                                             | 8B7      |
| 214650_x_at                     | -1.4 |                                                                                          | myelin oligodendrocyte glycoprotein                                                | MOG      |
| 207777_s_at                     | -1.5 |                                                                                          | nuclear body protein Sp140                                                         | SP140    |
| 214119_s_at                     | -1.2 |                                                                                          | FK506-binding protein 1A (12kD)                                                    | FKBP1A   |
| 217923_at                       | 1.4  |                                                                                          | peflin                                                                             | PEF      |
| 221323_at                       | -1.3 |                                                                                          | UL16-binding protein 1                                                             | ULBP1    |
| 202019_s_at                     | -1.1 |                                                                                          | LanC (bacterial antibiotic synthetase component C)-like 1                          | LANCL1   |
| <i>Interferon Signalling</i>    |      |                                                                                          |                                                                                    |          |
| 214569_at                       | -2.9 |                                                                                          | interferon, alpha 5                                                                | IFNA5    |

|                                         |      |      |                                                                                                        |              |
|-----------------------------------------|------|------|--------------------------------------------------------------------------------------------------------|--------------|
| 208548_at                               |      | -4   | interferon, alpha 6                                                                                    | IFNA6        |
| 208259_x_at                             | -1.4 |      | interferon, alpha 7                                                                                    | IFNA7        |
| 205170_at                               | -1.5 | -1.4 | signal transducer and activator of transcription 2, 113kD                                              | STAT2        |
| 214462_at                               | -1   |      | STAT induced STAT inhibitor-4                                                                          | CIS4         |
| 214105_at                               |      | -1.6 | STAT induced STAT inhibitor 3                                                                          | SSI-3        |
| 205841_at                               |      | 2.8  | Janus kinase 2 (a protein tyrosine kinase)                                                             | JAK2         |
| 203153_at                               |      | 3    | interferon-induced protein with tetratricopeptide repeats 1                                            | IFIT1        |
| 210163_at                               |      | 1.9  | interferon stimulated T-cell alpha chemoattractant precursor                                           | SCYB11       |
| 208965_s_at                             |      | 1.4  | interferon, gamma-inducible protein 16                                                                 | IFI16        |
| <i>Immunoglobulin Related Molecules</i> |      |      |                                                                                                        |              |
| 216372_at                               | -1.1 |      | clone N97 immunoglobulin heavy chain variable region mRNA                                              |              |
| 216371_at                               | -1.1 |      | clone N97 immunoglobulin heavy chain variable region mRNA                                              |              |
| 206420_at                               | -1.4 |      | immunoglobulin superfamily, member 6                                                                   | IGSF6        |
| 216034_at                               | -1.5 | -1.9 | immunoglobulin lambda gene locus DNA, clone:288A10                                                     |              |
| 216557_x_at                             | -1.6 |      | mRNA for single-chain antibody / Human rearranged immunoglobulin heavy chain (A1VH3) gene, partial cds |              |
| 203788_s_at                             | -1.7 |      | sema domain, immunoglobulin domain (Ig), short basic domain, secreted, (semaphorin) 3C                 | SEMA3C       |
| 203789_s_at                             | -1.9 |      | sema domain, immunoglobulin domain (Ig), short basic domain, secreted, (semaphorin) 3C                 | SEMA3C       |
| 35666_at                                |      | -1.2 | Human semaphorin III family homolog mRNA, complete cds                                                 |              |
| 217193_x_at                             | -2.1 |      | H.sapiens mRNA for IgG lambda light chain V-J-C region (clone Tgl11)                                   |              |
| 217390_x_at                             |      | -1.4 | Homo sapiens partial IGVH3 gene for immunoglobulin heavy chain V region, case 1, clone 16              |              |
| 38241_at                                |      | 1    | 3.2 butyrophilin                                                                                       | BTF3         |
| 212613_at                               |      | 1.2  | 2.3 butyrophilin, subfamily 3, member A2                                                               | BTN3A2       |
| 209846_s_at                             |      | 1    | 2 Similar to butyrophilin, subfamily 3, member A2                                                      | BTN3A2       |
| 204821_at                               |      | 1.6  | butyrophilin, subfamily 3, member A3                                                                   | BTN3A3       |
| 208191_x_at                             |      | -1.2 | pregnancy specific beta-1-glycoprotein 4                                                               | SPG4         |
| 206520_x_at                             |      | -1.3 | sialic acid binding Ig-like lectin 6                                                                   | SIGLEC6      |
| 210796_x_at                             |      | -1.5 | CD33L2                                                                                                 | SIGLEC6      |
| <b>Transcription</b>                    |      |      |                                                                                                        |              |
| 202485_s_at                             | -1.6 |      | methyl-CpG binding domain protein 2, isoform 1                                                         | MBD2         |
| 203748_x_at                             |      | 4.2  | RNA binding motif, single stranded interacting protein 1 (RBMS1), transcript variant MSSP-2            | RBMS1        |
| 207266_x_at                             |      | 3.5  | RNA binding motif, single stranded interacting protein 1 (RBMS1), transcript variant MSSP-3            | RBMS1        |
| 208627_s_at                             |      | 3.9  | nuclease sensitive element binding protein 1                                                           | NSEP1        |
| 201996_s_at                             |      | 2.1  | KIAA0929 protein Msx2 interacting nuclear target (MINT) homolog                                        | KIAA0929     |
| 202864_s_at                             |      | 1.8  | nuclear antigen Sp100                                                                                  | SP100        |
| 202487_s_at                             |      | 1    | purine-rich element binding protein B                                                                  | PURB         |
| 205931_s_at                             |      | -1.2 | Homo sapiens cAMP response element-binding protein CRE-BPa (H_GS165L15.1), mRNA.                       | H_GS165L15.1 |
| 214050_at                               |      | -1.5 | CGG triplet repeat binding protein 1                                                                   | CGGBP1       |
| 209362_at                               |      | 1    | SRB7 (suppressor of RNA polymerase B, yeast) homolog                                                   | SURB7        |
| 201085_s_at                             |      | 1.2  | SON DNA binding protein                                                                                | SON          |
| <i>Basic Transcription Machinery</i>    |      |      |                                                                                                        |              |
| 220113_x_at                             | -1.7 |      | similar to DNA-directed RNA polymerase I (135 kDa)                                                     | FLJ10816     |
| 203664_s_at                             |      | 1.5  | polymerase (RNA) II (DNA directed) polypeptide D                                                       | POLR2D       |
| 206654_s_at                             | -1.9 |      | polymerase (RNA) III (DNA directed) (32kD)                                                             | RPC32        |
| 209382_at                               |      | 1.6  | RNA polymerase III subunit                                                                             | RPC62        |
| 209463_s_at                             |      | 3    | TFIID subunit p22                                                                                      | TAF2J        |
| 204772_s_at                             |      | 1    | transcription termination factor, RNA polymerase I                                                     | TFE1         |
| 214451_at                               | -1   |      | transcription factor AP-2 beta (activating enhancer-binding protein 2 beta)                            | TFAP2B       |
| 222104_x_at                             | -1.5 |      | general transcription factor IIH, polypeptide 3 (34kD subunit)                                         | GTTF2H3      |
| 210537_s_at                             |      | 1.7  | Similar to transcriptional adaptor 2 (ADA2, yeast, homolog)-like, clone MGC:1984                       | TADA2L       |
| 216941_s_at                             |      | 2.9  | TATA box binding protein (TBP)-associated factor, RNA polymerase I, B, 63kD                            | TAF1B        |
| 209430_at                               |      | -1   | mRNA for TBP-associated factor 170                                                                     | TAFI170      |
| 203542_s_at                             |      | 1.3  | basic transcription element binding protein 1                                                          | BTEB1        |
| 203543_s_at                             |      | 1.8  | basic transcription element binding protein 1                                                          | BTEB1        |
| 209212_s_at                             |      | 1.8  | mRNA for transcription factor BTEB2, complete cds                                                      | bteb2        |
| 208517_x_at                             |      | 1.3  | basic transcription factor 3                                                                           | BTF3         |
| <i>Transcription Factors</i>            |      |      |                                                                                                        |              |
| 206940_s_at                             | -1   |      | POU domain, class 4, transcription factor 1                                                            | POU4F1       |
| 209947_at                               | -1.2 |      | KIAA0144 gene product                                                                                  | KIAA0144     |
| 205861_at                               | -1   |      | Spi-B transcription factor (Spi-1PU.1 related)                                                         | SP1B         |
| 221234_s_at                             | -1.1 |      | BTB and CNC homology 1, basic leucine zipper transcription factor 2                                    | BACH2        |
| 201416_at                               |      | -1.2 | SRY (sex determining region Y)-box 4                                                                   | SOX4         |
| 202936_s_at                             | -1.1 |      | SRY (sex determining region Y)-box 9 (campomelic dysplasia, autosomal sex-reversal)                    | SOX9         |
| 202935_s_at                             | -1.9 |      | SRY (sex determining region Y)-box 9 (campomelic dysplasia, autosomal sex-reversal)                    | SOX9         |
| 209842_at                               |      | -1.4 | SRY (sex determining region Y)-box 10                                                                  | SOX10        |
| 38918_at                                |      | -1.9 | HMG box factor SOX-13                                                                                  |              |
| 210827_s_at                             | -1.2 |      | epithelial-specific transcription factor ESE-1a                                                        | ESE-1        |
| 217053_x_at                             | -1.3 |      | mRNA for ER81 transcription factor                                                                     | ER81         |
| 211105_s_at                             | -1.3 |      | transcription factor                                                                                   | NF-ATcC      |
| 211106_at                               | -1.4 |      | transcription factor SUPT3H                                                                            | SUPT3H       |
| 205365_at                               | -1.4 |      | homeo box B6                                                                                           | HOXB6        |
| 220625_s_at                             | -1.5 |      | Ets transcription factor ESE-2b mRNA                                                                   | ELF5         |
| 205529_s_at                             | -1.8 |      | core-binding factor, runt domain, alpha subunit2; translocated to, 1; cyclin D-related                 | CBFA2T1      |
| 210365_at                               | -1.8 | -1.5 | AML1 mRNA for AML1a protein (alternatively spliced product)                                            | AML1         |
| 209360_s_at                             | -2.3 | -1.4 | AML1 mRNA for AML1b protein (alternatively spliced product)                                            | AML1         |
| 204198_s_at                             |      | -1.7 | runt-related transcription factor 3                                                                    | RUNX3        |
| 204197_s_at                             | -1.6 | -1.1 | runt-related transcription factor 3                                                                    | RUNX3        |
| 210479_s_at                             |      | 2.5  | transcription factor RZR-alpha mRNA                                                                    | RORA         |

|             |      |      |                                                                                           |          |
|-------------|------|------|-------------------------------------------------------------------------------------------|----------|
| 211466_at   | -1.2 | -1.1 | nuclear factor I B3                                                                       | NFIB     |
| 213298_at   |      | 1.8  | mRNA for CAAT-box binding transcription factor CTF-1 (syn. CTFNFI or CTF or NF-I or NF-1) | NFIC     |
| 218724_s_at |      | 1.7  | TGF(beta)-induced transcription factor 2                                                  | TGIF2    |
| 214499_s_at |      | 1.7  | Bcl-2-associated transcription factor short form mRNA                                     | KIAA0164 |
| 212420_at   |      | 1.6  | E74-like factor 1 (ets domain transcription factor)                                       | ELF1     |
| 220625_s_at |      | -2.1 | Ets transcription factor ESE-2b mRNA,                                                     | ELF5     |
| 208961_s_at | 1.3  |      | mRNA for DNA-binding zinc finger(GBF)                                                     | COPEB    |
| 218286_s_at |      | 1.1  | ring finger protein 7                                                                     | RNF7     |
| 201779_s_at |      | 1.2  | clone 24450 RING zinc finger protein RZF mRNA                                             | RNF13    |
| 207236_at   |      | 1.1  | zinc finger protein 10 (KOX 1)                                                            | ZNF10    |
| 218006_s_at |      | 3.2  | zinc finger protein 22 (KOX 15)                                                           | ZNF22    |
| 212684_at   |      | 2.2  | zinc finger protein 38 (KOX 25)                                                           | ZNF38    |
| 203603_s_at | -2.2 | -1.6 | zinc finger homeobox 1B                                                                   | ZFHX1B   |
| 214741_at   | 1.2  | 3.4  | zinc finger protein 131 (clone pHZ-10)                                                    | ZNF131   |
| 207394_at   |      | -1.3 | zinc finger protein 137 (clone pHZ-30)                                                    | ZNF137   |
| 206683_at   |      | 1.4  | zinc finger protein 165                                                                   | ZNF165   |
| 206261_at   | -1.3 |      | zinc finger protein 239                                                                   | ZNF239   |
| 218645_at   |      | 1.7  | zinc finger protein 277                                                                   | ZNF277   |
| 211393_at   | -1.4 |      | krueppel-related zinc finger protein SBZF5 mRNA                                           | ZNF278   |
| 205383_s_at | -1.1 | -1.5 | zinc finger protein 288                                                                   | ZNF288   |
| 200867_at   | 1    |      | zinc finger protein 313                                                                   | ZNF313   |
| 218735_s_at |      | -1.2 | zinc finger protein                                                                       | AF020591 |
| 206314_at   |      | -1.2 | zinc finger protein (ZFP)                                                                 | ZFP      |
| 209494_s_at | -1   |      | zinc finger protein 278                                                                   | ZFP278   |
| 219104_at   | 1.1  |      | C3HC4-like zinc finger protein                                                            | ZFP26    |
| 220653_at   | -1   |      | zinc finger, imprinted 2                                                                  | ZIM2     |
| 206511_s_at | -2.4 |      | sine oculis homeobox (Drosophila) homolog 2                                               | SIX2     |
| 206140_at   | -5   | -4.7 | LIM homeobox protein 2                                                                    | LHX2     |
| 216973_s_at | -1   |      | homeo box B7                                                                              |          |
| 209706_at   | -1.1 |      | homeobox protein NKX3.1                                                                   | NKX3A    |
| 205991_s_at | -1.4 |      | paired mesoderm homeo box 1, transcript variant pmx-1a                                    | PMX1     |
| 204689_at   | -1.7 |      | hematopoietically expressed homeobox                                                      | HHEX     |
| 207147_at   |      | -1.8 | distal-less homeo box 2                                                                   | DLX2     |
| 208216_at   |      | -1.2 | distal-less homeobox 4                                                                    | DLX4     |
| 210259_s_at | -1.7 |      | beta protein 1 BP1                                                                        | DLX4     |
| 210162_s_at | -1.1 | -1.7 | NF-ATc mRNA                                                                               | NFATC1   |
| 208003_s_at | -2.2 |      | nuclear factor of activated T-cells 5, tonicity-resonsive                                 | NFAT5    |
| 215092_s_at |      | 3.1  | nuclear factor of activated T-cells 5, tonicity-resonsive                                 | NFAT5    |
| 213260_at   | -1   | -1.7 | forkhead box C1                                                                           | FOXC1    |
| 206377_at   | -1.3 | -1.2 | forkhead box F2                                                                           | FOXF2    |
| 202580_x_at | 1.2  |      | forkhead box M1                                                                           | FOXM1    |
| 209583_s_at | -2.9 | -1.5 | brain my033 protein mRNA                                                                  | MOX2     |
| 202645_s_at | -1.5 |      | multiple endocrine neoplasia I                                                            | MEN1     |
| 212007_at   | 1    | 2.4  | UBX domain-containing 1                                                                   | UBXDC1   |
| 212008_at   |      | 1.1  | UBX domain-containing 1                                                                   | UBXDC1   |
| 203176_s_at |      | 1.6  | transcription factor 6-like 1 (mitochondrial transcription factor 1-like)                 | TCF6L1   |
| 218502_s_at | -2   | -1.6 | trichorhinophalangeal syndrome 1 gene                                                     | TRPS1    |
| 200878_at   | 1.2  |      | endothelial PAS domain protein 1                                                          | EPAS1    |
| 204651_at   |      | -1   | nuclear respiratory factor 1                                                              | NRF1     |
| 201694_s_at |      | -1.3 | early growth response 1                                                                   | EGR1     |
| 214077_x_at |      | -1.6 | Meis (mouse) homolog 3                                                                    | MEIS3    |
| 206968_s_at | -1   |      | nuclear factor related to kappa B bindingprotein                                          | NFRKB    |
| 215511_at   | -1.1 |      | AR1                                                                                       | TCF20    |
| 206283_s_at | -1.1 |      | T-cell acute lymphocytic leukemia 1                                                       | TAL1     |
| 202046_s_at | -1.2 |      | glucocorticoid receptor DNA binding factor 1                                              | GRLF1    |
| 219850_s_at |      | 2.2  | Homo sapiens Ets homologous factor (EHF), mRNA.                                           | EHF      |
| 221950_at   |      | -1.2 | empty spiracles (Drosophila) homolog 2                                                    | EMX2     |
| 216509_x_at | -1.4 |      | type V AF10 protein                                                                       | AF10     |
| 220684_at   | -1.5 |      | T-box 21                                                                                  | TBX21    |
| 216364_s_at |      | -2.6 | FMR2 protein                                                                              | fmr2     |
| 220559_at   |      | -2.4 | engrailed homolog 1                                                                       | EN1      |
| 209431_s_at |      | -1.3 | zinc finger sarcoma gene long A isoform                                                   | ZSG      |
| 209928_s_at |      | -1   | activated B-cell factor-1                                                                 | ABF-1    |
| 203517_at   | 1    |      | metaxin 2                                                                                 | MTX2     |
| 203346_s_at | 1    |      | PHD finger DNA binding protein isoform 1                                                  | M96      |
| 200959_at   | 1.5  |      | fusion, derived from t(12;16) malignantliposarcoma                                        | FUS      |
| 217427_s_at | 1.6  |      | TUP1 like enhancer of SPLIT gene 1                                                        | TUPLE1   |
| 212916_at   |      | -1.1 | KIAA1111 protein                                                                          | KIAA1111 |
| 203554_x_at | 1.1  | 1    | pituitary tumor-transforming 1                                                            | PTTG1    |
| 210426_x_at |      | 2.4  | orphan hormone nuclear receptor RORalpha1                                                 | RORA     |

#### Co-factor

|             |      |      |                                                                         |          |
|-------------|------|------|-------------------------------------------------------------------------|----------|
| 202132_at   |      | 1.9  | transcriptional co-activator with PDZ-binding motif                     | TAZ      |
| 217120_s_at | -1.9 |      | cofactor required for Sp1 transcriptional activation, subunit 2 (150kD) | CRSP2    |
| 201504_s_at |      | 1.6  | translin                                                                | TSN      |
| 202817_s_at |      | 1.5  | synovial sarcoma, translocated to X chromosome                          | SSXT     |
| 203204_s_at |      | -1.7 | KIAA0677 gene product                                                   | KIAA0677 |
| 218574_s_at | -1.3 | -2.7 | LIM and cysteine-rich domains 1                                         | LMCD1    |
| 209059_s_at |      | 1.6  | Homo sapiens mRNA for hMBF1alpha, complete cds.                         | EDF1     |
| 209129_at   |      | 1.4  | Human zyxin related protein ZRP-1 mRNA, complete cds.                   | TRIP6    |
| 221496_s_at |      | 1.2  | tob family                                                              | TOB2     |
| 214688_at   |      | -1.4 | transducin-like enhancer of split 4, homolog of Drosophila E(sp1)       | TLE4     |
| 204872_at   |      | -1   | BCE-1 protein                                                           | BCE-1    |
| 201862_s_at |      | 1.5  | leucine rich repeat (in FLII) interactingprotein 1                      | LRRFIP1  |
| 214397_at   | -1   |      | methyl-CpG binding domain protein 2                                     | MBD2     |

#### RNA Splicing

|             |      |                                                                                                                        |        |
|-------------|------|------------------------------------------------------------------------------------------------------------------------|--------|
| 209381_x_at | -1.9 | Homo sapiens, clone MGC:3975, mRNA, complete cds.                                                                      | SF3A2  |
| 214305_s_at | 2    | splicing factor 3b, subunit 1, 155kD                                                                                   | SF3B1  |
| 201070_x_at | 1.6  | splicing factor 3b, subunit 1, 155kD                                                                                   | SF3B1  |
| 201741_x_at | -1.4 | Human SF2p33 mRNA, complete cds.                                                                                       | SFRS1  |
| 202899_s_at | 1.7  | splicing factor, arginineserine-rich 3                                                                                 | SFRS3  |
| 212266_s_at | 1.2  | splicing factor, arginineserine-rich 5                                                                                 | SFRS5  |
| 213649_at   | 1    | splicing factor, arginineserine-rich 7 (35kD)                                                                          | SFRS7  |
| 214141_x_at | 1.2  | splicing factor, arginineserine-rich 7 (35kD)                                                                          | SFRS7  |
| 202773_s_at | 1.2  | splicing factor, arginineserine-rich 8 (suppressor-of-white-apricot, Drosophila homolog)                               | SFRS8  |
| 201698_s_at | 2.3  | splicing factor, arginineserine-rich 9                                                                                 | SFRS9  |
| 210180_s_at | 1    | Homo sapiens htra2-beta-2 mRNA, complete cds.                                                                          | SFRS10 |
| 207435_s_at | -1   | Homo sapiens RNA binding protein; AT-rich element binding factor (SRM300), mRNA. / splicing coactivator subunit SRm300 | SRM300 |
| 208910_s_at | 4.1  | Homo sapiens pre-mRNA splicing factor 2 p32 subunit (SF2p32) mRNA, complete cds                                        | C1QBP  |
| 209161_at   | 2.4  | PRP4STKWD splicing factor                                                                                              | HPRP4P |
| 213898_at   | -1.6 | RNA binding motif protein 9                                                                                            | RBM9   |
| 201152_s_at | 1.4  | muscleblind (Drosophila)-like                                                                                          | MBNL   |
| 203103_s_at | 1.1  | nuclear matrix protein NMP200 related to splicing factor PRP19                                                         | NMP200 |
| 37462_i_at  | -2   | Human spliceosomal protein (SAP 62) gene, complete cds                                                                 |        |
| 203597_s_at | 1.2  | WW domain binding protein 4 (formin binding protein 21)                                                                | WBP4   |
| 205961_s_at | 1.1  | PC4 and SFRS1 interacting protein 2                                                                                    | PSIP2  |
| 210178_x_at | 1.3  | TLS-associated protein TASR                                                                                            | TASR1  |
| 210093_s_at | 1.4  | Mago homolog                                                                                                           | MAGOH  |

#### Translation

|             |      |                                                                                            |         |
|-------------|------|--------------------------------------------------------------------------------------------|---------|
| 214395_x_at | -1.3 | eukaryotic translation elongation factor 1 delta (guanine nucleotide exchange protein)     | EEF1D   |
| 200689_x_at | 2.6  | eukaryotic translation elongation factor 1 gamma                                           | EEF1G   |
| 204102_s_at | 2.1  | translation elongation factor 2                                                            | EEF2    |
| 201144_s_at | 1    | eukaryotic translation initiation factor 2, subunit 1 (alpha, 35kD )                       | EIF2S1  |
| 200005_at   | 1.1  | eukaryotic translation initiation factor 3, subunit 7 (zeta, 6667kD)                       | EIF3S7  |
| 210949_s_at | 1.4  | Similar to eukaryotic translation initiation factor 3, subunit 8 (110kD)                   | EIF3S8  |
| 200596_s_at | 1.7  | eukaryotic translation initiation factor 3, subunit 10                                     | EIF3S10 |
| 201530_x_at | 1    | eukaryotic translation initiation factor 4A, isoform 1                                     | EIF4A1  |
| 209393_s_at | 2.6  | cap-binding protein 4EHP mRNA                                                              | EIF4EL3 |
| 206621_s_at | 1.2  | Williams-Beuren syndrome chromosome region 1 / eukaryotic translation initiation factor 4H | WBSCR1  |
| 208705_s_at | 1.5  | eukaryotic translation initiation factor 5                                                 | EIF5    |
| 201027_s_at | 1.3  | translation initiation factor IF2                                                          | IF2     |
| 212566_at   | -1.5 | putative translation initiation factor                                                     | SUI1    |
| 218696_at   | 3    | eukaryotic translation initiation factor 2-alpha kinase 3                                  | EIF2AK3 |
| 213899_at   | 2.3  | methionine aminopeptidase; eIF-2-associated p67                                            | MNPEP   |
| 209861_s_at | 1.2  | eIF-2-associated p67 homolog                                                               | MNPEP   |
| 208319_s_at | 1.5  | RNA binding motif protein 3                                                                | RBM3    |
| 209024_s_at | 1.2  | NS1-associated protein 1                                                                   | NSAP1   |
| 202157_s_at | -1   | RNA-binding protein BRUNOL3                                                                | BRUNOL3 |
| 208628_s_at | 1.8  | Homo sapiens, Similar to Y box protein 1, clone MGC:8655, mRNA, complete cds.              | NSEP1   |
| 202156_s_at | -1.4 | CUG triplet repeat, RNA-binding protein 2                                                  | CUGBP2  |
| 213517_at   | -1   | poly(rC)-binding protein 2                                                                 | PCBP2   |

#### Protein Degredation

|           |    |             |        |
|-----------|----|-------------|--------|
| 220422_at | -2 | ubiquilin 3 | UBQLN3 |
|-----------|----|-------------|--------|

#### Proteasome

|             |     |                                                                                          |         |
|-------------|-----|------------------------------------------------------------------------------------------|---------|
| 201532_at   | 1.8 | proteasome (prosome, macropain) subunit, alpha type, 3                                   | PSMA3   |
| 216088_s_at | 5.2 | proteasome (prosome, macropain) subunit, alpha type, 7                                   | PSMA7   |
| 200876_s_at | 3.1 | proteasome (prosome, macropain) subunit, beta type, 1                                    | PSMB1   |
| 202243_s_at | 2.4 | proteasome (prosome, macropain) subunit, beta type, 4                                    | PSMB4   |
| 204279_at   | 1.4 | proteasome (prosome, macropain) subunit, beta type, 9 (large multifunctional protease 2) | PSMB9   |
| 201067_at   | 1   | proteasome (prosome, macropain) 26S subunit, ATPase, 2                                   | PSMC2   |
| 201068_s_at | 1   | proteasome (prosome, macropain) 26S subunit, ATPase, 2                                   | PSMC2   |
| 209503_s_at | 1.5 | proteasome (prosome, macropain) 26S subunit, ATPase, 5                                   | PSMC5   |
| 201198_s_at | 1.2 | proteasome (prosome, macropain) 26S subunit, non-ATPase, 1                               | PSMD1   |
| 200814_at   | 1   | proteasome (prosome, macropain) activator subunit 1 (PA28 alpha)                         | PSME1   |
| 209040_s_at | 1.5 | proteasome subunit LMP7 (allele LMP7B)                                                   | LMP7    |
| 210759_s_at | 1.2 | prosomeal protein P30-33K                                                                | pros-30 |

#### ubiquitination

|             |      |                                                                  |        |
|-------------|------|------------------------------------------------------------------|--------|
| 204022_at   | -1.3 | Nedd-4-like ubiquitin-protein ligase                             | WWP2   |
| 201001_s_at | 1.2  | ubiquitin-conjugating enzyme E2 variant 1                        | UBE2V1 |
| 200682_s_at | 2.9  | ubiquitin-conjugating enzyme E2L 3                               | UBE2L3 |
| 213822_s_at | -1.4 | ubiquitin protein ligase                                         | UBE3B  |
| 208761_s_at | 2.5  | ubiquitin-related protein SUMO-1 mRNA                            | UBL1   |
| 202412_s_at | 2.7  | ubiquitin specific protease 1                                    | USP1   |
| 206405_x_at | -1.1 | ubiquitin specific protease 6 (Tre-2 oncogene)                   | USP6   |
| 209136_s_at | 1.6  | ubiquitin specific protease 10                                   | USP10  |
| 219211_at   | -2   | ubiquitin specific protease 18                                   | USP18  |
| 214674_at   | -1.2 | ubiquitin specific protease 19                                   | USP19  |
| 207614_s_at | 1.2  | cullin 1                                                         | CUL1   |
| 201840_at   | 1.6  | neural precursor cell expressed, developmentallydown-regulated 8 | NEDD8  |
| 203637_s_at | -1   | midline 1                                                        | MID1   |
| 201846_s_at | 1.1  | RING1 and YY1 binding protein                                    | RYBP   |
| 209743_s_at | 1.1  | atrophin-1 interacting protein 4                                 | AIP4   |
| 203078_at   | -1.5 | CUL-2                                                            | CUL-2  |

#### F-Box Proteins

|                                                                    |      |      |                                                                                                           |           |
|--------------------------------------------------------------------|------|------|-----------------------------------------------------------------------------------------------------------|-----------|
| 212218_s_at                                                        | -1.1 |      | F-box only protein 9                                                                                      | FBXO9     |
| <b>Kinases</b>                                                     |      |      |                                                                                                           |           |
| 208079_s_at                                                        | 2    |      | serinethreonine kinase 6                                                                                  | STK6      |
| 208095_s_at                                                        | 1.8  | 1.2  | calcium/calmodulin-dependent protein kinase (CaM kinase) II gamma                                         | CAMK2G    |
| 219148_at                                                          | 1.7  | 1.1  | PDZ-binding kinase; T-cell originated protein kinase                                                      | TOPK      |
| 209799_at                                                          | 1.4  |      | AMP-activated kinase alpha 1 subunit                                                                      | PRKAA1    |
| 202801_at                                                          |      | -1   | protein kinase, cAMP-dependent, catalytic, alpha                                                          | PRKACA    |
| 201805_at                                                          |      | 2.2  | protein kinase, AMP-activated, gamma 1 non-catalytic subunit                                              | PRKAG1    |
| 200605_s_at                                                        |      | 1.5  | protein kinase, cAMP-dependent, regulatory, type I, alpha (tissue specific extinguisher 1)                | PRKAR1A   |
| 209685_s_at                                                        | -1   |      | protein kinase C beta-II type                                                                             | PRKCB1    |
| 218236_s_at                                                        | -1   |      | protein kinase C, nu                                                                                      | PRKCN     |
| 211993_at                                                          |      | 1.7  | protein kinase, lysine deficient 1                                                                        | PRKWNK1   |
| 206562_s_at                                                        | 1.2  | 1.5  | casein kinase 1, alpha 1                                                                                  | CSNK1A1   |
| 211623_s_at                                                        |      | 1.2  | casein kinase II beta subunit                                                                             | CSNK2B    |
| 204822_at                                                          | 1.1  | 1.1  | TTK protein kinase                                                                                        | TTK       |
| 207540_s_at                                                        | 2.4  |      | spleen tyrosine kinase                                                                                    | SYK       |
| 217356_s_at                                                        | 1.1  |      | phosphoglycerate kinase (alternatively spliced)                                                           |           |
| 203856_at                                                          | 1    |      | vaccinia related kinase 1                                                                                 | VRK1      |
| 204060_s_at                                                        | 1    |      | protein kinase, X-linked                                                                                  | PRKX      |
| 215909_x_at                                                        |      | -1   | MisshapenNIK-related kinase                                                                               | MINK      |
| 215916_at                                                          |      | -1   | MisshapenNIK-related kinase                                                                               | MINK      |
| 204813_at                                                          | -1.2 |      | mitogen-activated protein kinase 10                                                                       | MAPK10    |
| 211536_x_at                                                        |      | -5.1 | mRNA for TGF-beta activated kinase 1c                                                                     | MAP3K7    |
| 203652_at                                                          |      | -1   | mitogen-activated protein kinase kinase kinase 11                                                         | MAP3K11   |
| 213263_s_at                                                        |      | 1.8  | mitogen-activated protein kinase kinase kinase 12                                                         | MAP3K12   |
| 205192_at                                                          |      | -1   | mitogen-activated protein kinase kinase kinase 14                                                         | MAP3K14   |
| 211504_x_at                                                        | -1.2 |      | mRNA for Rho kinase                                                                                       | ROCK2     |
| 206028_s_at                                                        | -1.5 |      | c-mer proto-oncogene tyrosine kinase                                                                      | MERTK     |
| 200884_at                                                          | -1.5 |      | creatine kinase, brain                                                                                    | CKB       |
| 200644_at                                                          | -1.8 | -1   | macrophage myristoylated alanine-rich C kinase substrate                                                  | MACMARCKS |
| 200075_s_at                                                        |      | 1.3  | guanylate kinase 1                                                                                        |           |
| 204635_at                                                          |      | 1.2  | ribosomal protein S6 kinase, 90kD, polypeptide 5                                                          | RPS6KA5   |
| 209043_at                                                          |      | 1.2  | bifunctional ATP sulfurylaseadenosine 5-phosphosulfate kinase                                             | PAPSS1    |
| 202971_s_at                                                        |      | 1.1  | dual-specificity tyrosine-(Y)-phosphorylationregulated kinase 2 isoform 2                                 | DYRK2     |
| 213328_at                                                          |      | 1    | NIMA (never in mitosis gene a)-related kinase 1                                                           | NEK1      |
| 209438_at                                                          |      | -1.1 | phosphorylase kinase, alpha 2 (liver)                                                                     | PHKA2     |
| 207821_s_at                                                        |      | -1.3 | PTK2 protein tyrosine kinase 2                                                                            | PTK2      |
| 207106_s_at                                                        |      | -1.4 | leukocyte tyrosine kinase                                                                                 | LTK       |
| 219028_at                                                          |      | -1.5 | homeodomain-interacting protein kinase 2                                                                  | HIPK2     |
| 202686_s_at                                                        |      | -1.6 | AXL receptor tyrosine kinase isoform 1precursor                                                           | AXL       |
| 202118_s_at                                                        |      | 2.3  | copine III                                                                                                | CPNE3     |
| 216680_s_at                                                        | -1.2 |      | Homo sapiens, Similar to EphB4, clone IMAGE:3611312, mRNA, partial cds.                                   | EPHB4     |
| <b>Phosphatases</b>                                                |      |      |                                                                                                           |           |
| 201538_s_at                                                        | -1.3 |      | dual specificity phosphatase 3 (vaccinia virus phosphatase VH1-related)                                   | DUSP3     |
| 204014_at                                                          |      | -1.7 | dual specificity phosphatase 4                                                                            | DUSP4     |
| 206374_at                                                          | -1   |      | dual specificity phosphatase 8                                                                            | DUSP8     |
| 202703_at                                                          | 1.3  |      | dual specificity phosphatase 11 (RNARNP complex 1-interacting)                                            | DUSP11    |
| 213305_s_at                                                        | 1    | 3.8  | protein phosphatase 2A B56-gamma1                                                                         | PP2A      |
| 210946_at                                                          | -1   | -1.3 | type-2 phosphatidic acid phosphatase alpha-2                                                              | PAP2-a2   |
| 214693_x_at                                                        |      | 4.4  | phosphatidic acid phosphatase type 2A                                                                     | PPAP2A    |
| 212226_s_at                                                        |      | -1.2 | phosphatidic acid phosphatase type 2B                                                                     | PPAP2B    |
| 212230_at                                                          | -1.6 | -1.3 | phosphatidic acid phosphatase type 2B                                                                     | PPAP2B    |
| 218273_s_at                                                        | -1.1 |      | pyruvate dehydrogenase phosphatase                                                                        | PDP       |
| 216988_s_at                                                        |      | 1.4  | protein tyrosine phosphatase type IVA, member 2                                                           | PTP4A2    |
| 208615_s_at                                                        |      | 1.6  | protein tyrosine phosphatase type IVA, member 2                                                           | PTP4A2    |
| 209695_at                                                          | -1.1 |      | Similar to protein tyrosine phosphatase type IVA, member 3                                                | PTP4A3    |
| 206344_at                                                          | -1.5 |      | serum arylalialkylphosphatase precursor mRNA                                                              | PON1      |
| 206687_s_at                                                        | -1.7 |      | protein tyrosine phosphatase, non-receptor type 6                                                         | PTPN6     |
| 213465_s_at                                                        |      | 1.1  | protein phosphatase 1, regulatory subunit 7                                                               | PPP1R7    |
| 201214_s_at                                                        |      | 1.4  | protein phosphatase 1, regulatory subunit 7                                                               | PPP1R7    |
| 201702_s_at                                                        |      | 2    | protein phosphatase 1, regulatory subunit 10                                                              | PPP1R10   |
| 205194_at                                                          | -1.1 |      | phosphoserine phosphatase                                                                                 | SPSH      |
| 211600_at                                                          | -2.3 | -1.5 | glomerular epithelial protein 1                                                                           | GLEPP1    |
| <b>Other Signaling / Scaffolding related / accessory / adaptor</b> |      |      |                                                                                                           |           |
| 215280_s_at                                                        | -1.1 |      | protein tyrosine phosphatase, receptor type, f polypeptide (PTPRF), interacting protein (liprin), alpha 3 | PPFIA3    |
| 213368_x_at                                                        | -1   |      | protein tyrosine phosphatase, receptor type, f polypeptide (PTPRF), interacting protein (liprin), alpha 3 | PPFIA3    |
| 205359_at                                                          | -1.5 |      | A kinase (PRKA) anchor protein 6                                                                          | AKAP6     |
| 211172_x_at                                                        |      | -1.5 | A-kinase anchoring protein 18 beta                                                                        | AKAP7     |
| 212334_at                                                          |      | -1   | Homo sapiens AKAP350C mRNA sequence, alternatively spliced                                                |           |
| 215336_at                                                          | -2   |      | A kinase (PRKA) anchor protein 11                                                                         | AKAP11    |
| 210057_at                                                          |      | 1.8  | lambdaiota protein kinase C-interacting protein mRNA                                                      | KIAA0421  |
| 204746_s_at                                                        |      | -1   | protein kinase C, alpha binding protein                                                                   | PRKCABP   |
| 202732_at                                                          |      | -1.3 | protein kinase (cAMP-dependent, catalytic) inhibitor gamma                                                | PKIG      |
| 205008_s_at                                                        |      | -1.5 | DNA-dependent protein kinase catalytic subunit-interacting protein 2                                      | KIP2      |
| 219024_at                                                          |      | 2.6  | pleckstrin homology domain-containing, family A (phosphoinositide binding specific) member 1              | PLEKHA1   |
| 201811_x_at                                                        | -1   |      | SH3-domain binding protein 5 (BTK-associated)                                                             | SH3BP5    |
| 206144_at                                                          | -1.1 | -1   | BAI1-associated protein 1                                                                                 | BAIAP1    |
| 202746_at                                                          | -1.2 |      | integral membrane protein 2A                                                                              | ITM2A     |



|             |      |      |                                                                                               |          |
|-------------|------|------|-----------------------------------------------------------------------------------------------|----------|
| 205367_at   | -1.8 |      | Homo sapiens adaptor protein with pleckstrin homology and src homology 2 domains (APS), mRNA. | APS      |
| 213307_at   | -1.8 | -1.6 | cortactin SH3 domain-binding protein                                                          | KIAA1022 |
| 215418_at   | -1.8 |      | alpha-parvin                                                                                  | PARVA    |
| 200787_s_at | -1.8 |      | phosphoprotein enriched in astrocytes 15                                                      | PEA15    |
| 207706_at   | -3.3 |      | Usher syndrome type IIa protein                                                               | USH2A    |
| 208670_s_at |      | 1.4  | Homo sapiens PNAS-26 mRNA, complete cds.                                                      | CR11     |
| 201811_x_at |      | -1.2 | Homo sapiens SH3-domain binding protein 5 (BTK-associated) (SH3BP5), mRNA.                    | SH3BP5   |
| 34031_i_at  |      | 1.6  | Human Krit1 mRNA, complete cds                                                                |          |
| 203300_x_at | -1.3 |      | adaptor-related protein complex 1, sigma 2 subunit                                            | AP1S2    |
| 200613_at   |      | 1.3  | adaptor-related protein complex 2, mu 1 subunit                                               | AP2M1    |
| 208710_s_at |      | 1    | adaptor-related protein complex 3, delta 1 subunit                                            | AP3D1    |
| 204400_at   |      | -1   | Homo sapiens signal transduction protein (SH3 containing) (EFS2), mRNA.                       | EFS2     |
| 219132_at   | -1.3 |      | pellino (Drosophila) homolog 2                                                                | PELI2    |
| 202342_s_at | -1.3 |      | tripartite motif protein TRIM2                                                                | KIAA0517 |
| 210579_s_at | -1.3 |      | tripartite motif protein TRIM10 alpha                                                         | TRIM10   |
| 203735_x_at |      | -1.1 | PTPRF interacting protein, binding protein 1 (liprin beta 1)                                  | PPFIBP1  |
| 221489_s_at | -1.2 |      | sprouty (Drosophila) homolog 4                                                                | SPRY4    |
| 217465_at   | -1.3 |      | NCK-associated protein 1                                                                      | NCKAP1   |
| 205741_s_at | -1.3 |      | dystrobrevin, alpha                                                                           | DTNA     |
| 214375_at   | -1.4 |      | PTPRF interacting protein, binding protein 1 (liprin beta 1)                                  | PPFIBP1  |
| 203299_s_at | -1.4 |      | Homo sapiens DC22 mRNA, complete cds.                                                         | AP1S2    |
| 202474_s_at | -1.4 |      | host cell factor C1 (VP16-accessory protein)                                                  | HCFC1    |
| 220405_at   | -1.9 |      | syntrophin, gamma 1                                                                           | SYNTG1   |
| 203593_at   |      | 1.1  | CD2-associated protein                                                                        | CD2AP    |
| 204362_at   |      | 1.1  | SKAP55 homologue                                                                              | SKAP-HOM |

### G proteins and related Genes

|             |      |      |                                                                                                         |            |
|-------------|------|------|---------------------------------------------------------------------------------------------------------|------------|
| 207791_s_at | 1.3  |      | RAB1, member RAS oncogene family                                                                        | RAB1       |
| 208734_x_at |      | 2.6  | GTP-binding protein                                                                                     | RAB2       |
| 208730_x_at |      | -1   | RAB2, member RAS oncogene family                                                                        | RAB2       |
| 219151_s_at |      | 2.8  | RAB, member of RAS oncogene family-like 2B                                                              | RABL2B     |
| 218360_at   |      | 1.5  | RAB22A, member RAS oncogene family                                                                      | RAB22A     |
| 217764_s_at | 1    |      | small GTP-binding protein rab22b mRNA                                                                   | RAB31      |
| 202483_s_at |      | 3.4  | RAN binding protein 1                                                                                   | RANBP1     |
| 200993_at   | 1    | 1.2  | RAN binding protein 7                                                                                   | RANBP7     |
| 214449_s_at | -1.2 |      | ras-like protein                                                                                        | TC10       |
| 205590_at   | -1.3 | -2.6 | RAS guanyl releasing protein 1 (calcium and DAG-regulated)                                              | RASGRP1    |
| 214352_s_at |      | 1.9  | v-Ki-ras2 Kirsten rat sarcoma 2 viral oncogene homolog                                                  | KRAS2      |
| 207629_s_at | -1.1 |      | rhORAC guanine nucleotide exchange factor (GEF) 2                                                       | ARHGEF2    |
| 203264_s_at |      | -2.1 | Cdc42 guanine exchange factor (GEF) 9                                                                   | ARHGEF9    |
| 212724_at   |      | 1.2  | ras homolog gene family, member E                                                                       | ARHE       |
| 201659_s_at |      | 1.1  | ADP-ribosylation factor-like 1                                                                          | ARL1       |
| 202641_at   |      | 1    | ADP-ribosylation factor-like 3                                                                          | ARL3       |
| 202206_at   |      | 1.6  | ADP-ribosylation factor-like 7                                                                          | ARL7       |
| 201453_x_at |      | 1.2  | Ras homolog enriched in brain 2                                                                         | RHEB2      |
| 204680_s_at |      | 1.1  | guanine nucleotide exchange factor for Rap1; M-Ras-regulated GEF                                        | KIAA0277   |
| 213467_at   |      | -1.1 | GTP-binding protein Rho7                                                                                | RHO7       |
| 200651_at   |      | -1.2 | guanine nucleotide binding protein (G protein), beta polypeptide 2-like 1                               | GNB2L1     |
| 204115_at   |      | -1.1 | guanine nucleotide binding protein 11                                                                   | GNG11      |
| 564_at      | -1   |      | guanine nucleotide-binding regulatory protein (G-gamma-alpha)                                           | HUMGTPBRPA |
| 40562_at    |      | -1   | guanine nucleotide-binding regulatory protein (G-gamma-alpha)                                           |            |
| 206608_s_at | -1.2 |      | retinitis pigmentosa GTPase regulator interacting protein 1                                             | RPGRIP1    |
| 206323_x_at | -1.2 | -1.2 | oligophrenin 1, Rho-GTPase activating protein                                                           | OPHN1      |
| 213446_s_at | -1.3 |      | IQ motif containing GTPase activating protein 1                                                         | IQGAP1     |
| 222077_s_at | 1.1  |      | GTPase activating protein                                                                               | ID-GAP     |
| 200750_s_at |      | 3.5  | GTP binding protein mRNA                                                                                | RAN        |
| 212977_at   |      | 1.1  | G protein-coupled receptor                                                                              | RDC1       |
| 214104_at   | -1.5 |      | G-protein coupled receptor                                                                              | RE2        |
| 213880_at   | -1.6 | -2   | G protein-coupled receptor 49                                                                           | GPR49      |
| 212070_at   | -1.2 |      | G protein-coupled receptor 56                                                                           | GPR56      |
| 221394_at   | -1.6 |      | G protein-coupled receptor 58                                                                           | GPR58      |
| 206002_at   | -2.1 | -2.3 | G protein-coupled receptor 64                                                                           | GPR64      |
| 219936_s_at |      | 1.3  | G protein-coupled receptor 87                                                                           | GPR87      |
| 200008_s_at | 1.1  |      | human rab GDI                                                                                           | GD12       |
| 209180_at   | 1    |      | geranylgeranyl transferase type II beta-subunit                                                         | RABGGTB    |
| 217835_x_at |      | 1    | putative Rab5-interacting protein                                                                       | LOC55969   |
| 209637_s_at | -1.1 |      | regulator of G-protein signalling 12                                                                    | RGS12      |
| 204336_s_at | -1   |      | G protein signalling regulator 19                                                                       | RGS19      |
| 204882_at   | 1.8  |      | KIAA0053 gene product                                                                                   | KIAA0053   |
| 210138_at   |      | 3.1  | regulator of G protein signaling-Z                                                                      | RGSZ1      |
| 216520_s_at |      | 2.6  | tumor protein, translationally-controlled 1                                                             | TPT1       |
| 200734_s_at |      | -1.5 | ADP-ribosylation factor 3                                                                               | ARF3       |
| 204732_s_at | -2   |      | ADP-ribosylation factor domain protein 1, 64kD                                                          | ARFD1      |
| 203910_at   |      | 1.2  | Homo sapiens PTPL1-associated RhoGAP 1                                                                  | PARG1      |
| 207369_at   | -1.4 | -1.8 | bombesin-like receptor 3                                                                                | BRS3       |
| 204819_at   | -1.1 |      | faciogenital dysplasia protein                                                                          | FGD1       |
| 221466_at   | -1.3 |      | pyrimidinergic receptor P2Y, G-protein coupled, 4                                                       | P2RY4      |
| 203817_at   |      | -1.5 | guanylate cyclase 1, soluble, beta 3                                                                    | GUCY1B3    |
| 218625_at   | -1.4 |      | neuritin                                                                                                | LOC51299   |
| 206455_s_at |      | -2.4 | Homo sapiens rhodopsin (opsin 2, rod pigment) (retinitis pigmentosa 4, autosomal dominant) (RHO), mRNA. | RHO        |
| 221524_s_at | 1.1  | 1.2  | Rag D                                                                                                   | RAGD       |
| 211503_s_at |      | 3.2  | ras-related protein rab-14                                                                              | Rab14      |

### Chaperones & Heat Shock

|             |     |     |                                        |       |
|-------------|-----|-----|----------------------------------------|-------|
| 200806_s_at | 1.8 | 1.7 | heat shock 60kD protein 1 (chaperonin) | HSPD1 |
|-------------|-----|-----|----------------------------------------|-------|

|             |      |                                              |                                              |          |
|-------------|------|----------------------------------------------|----------------------------------------------|----------|
| 200800_s_at | 2.4  | heat shock 70kD protein 1A                   | HSPA1A                                       |          |
| 201841_s_at | 3    | heat shock 27kD protein 1                    | HSPB1                                        |          |
| 211968_s_at | 1.6  | 2.2                                          | heat shock 90kD protein 1, alpha             | HSPCA    |
| 211969_at   | 1.5  | heat shock 90kD protein 1, alpha             | HSPCA                                        |          |
| 221742_at   | 1.5  | DnaJ (Hsp40) homolog, subfamily C, member 3  | DNAJC3                                       |          |
| 210211_s_at | 1.4  | Hsp89-alpha-delta-N                          | HSPCA                                        |          |
| 214359_s_at | 1.3  | heat shock 90kD protein 1, beta              | HSPCB                                        |          |
| 200692_s_at | 1.3  | 2.7                                          | heat shock 70kD protein 9B (mortalin-2)      | HSPA9B   |
| 210338_s_at | 1.3  | HSC54 mRNA for heat shock cognate protein 54 | HSC54                                        |          |
| 219212_at   | 1.1  | 1.1                                          | heat shock protein hsp70-related protein     | LOC51182 |
| 211015_s_at | 1.4  | heat shock protein 70 (hsp70) mRNA           | hsp70                                        |          |
| 201946_s_at | 1.2  | 2.6                                          | chaperonin containing TCP1, subunit 2 (beta) | CCT2     |
| 208696_at   | 2.3  | PNAS-102 mRNA                                | CCT5                                         |          |
| 209867_s_at | -1.7 | lectomedin-3                                 | LEC3                                         |          |
| 213919_at   | -1.2 | DnaJ (Hsp40) homolog, subfamily C, member 4  | DNAJC4                                       |          |

#### Metabolism and Homeostasis

|             |      |                                                                                                                                           |                                                   |       |
|-------------|------|-------------------------------------------------------------------------------------------------------------------------------------------|---------------------------------------------------|-------|
| 211478_s_at | 2.5  | dipeptidyl peptidase IV                                                                                                                   | CD26                                              |       |
| 216202_s_at | 2.5  | palmitoyltransferase                                                                                                                      | LCB2                                              |       |
| 208993_s_at | 1.7  | peptidyl-prolyl isomerase G (cyclophilin G)                                                                                               | PPIG                                              |       |
| 202179_at   | 1.5  | bleomycin hydrolase                                                                                                                       | BLMH                                              |       |
| 201477_s_at | 1    | ribonucleotide reductase M1 polypeptide                                                                                                   | RRM1                                              |       |
| 209773_s_at | 1.4  | 2.3                                                                                                                                       | ribonucleotide reductase M2 polypeptide           | RRM2  |
| 201890_at   | 1.1  | ribonucleotide reductase M2 polypeptide                                                                                                   | RRM2                                              |       |
| 205949_at   | -2.6 | carbonic anhydrase I                                                                                                                      | CAI                                               |       |
| 209301_at   | 1.2  | carbonic anhydrase II                                                                                                                     | CA2                                               |       |
| 205199_at   | -1   | carbonic anhydrase IX                                                                                                                     | CA9                                               |       |
| 203963_at   | 1.5  | carbonic anhydrase XII precursor                                                                                                          | CA12                                              |       |
| 219759_at   | 1.2  | aminopeptidase                                                                                                                            | LOC64167                                          |       |
| 213653_at   | 1.2  | putative methyltransferase                                                                                                                | M6A                                               |       |
| 218111_s_at | 1.1  | CMP-N-acetylneuraminic acid synthase                                                                                                      | LOC55907                                          |       |
| 210544_s_at | 1.1  | aldehyde dehydrogenase 10 (fatty aldehyde dehydrogenase)                                                                                  | ALDH3A2                                           |       |
| 211004_s_at | -1.3 | Similar to aldehyde dehydrogenase 7                                                                                                       | ALDH3B1                                           |       |
| 221590_s_at | -1.3 | Homo sapiens clone FLB9440 PRO2550 mRNA, complete cds                                                                                     | ALDH6A1                                           |       |
| 208911_s_at | 1.1  | pyruvate dehydrogenase (lipoamide) beta                                                                                                   | PDHB                                              |       |
| 203711_s_at | 1.1  | 3-hydroxyisobutyryl-Coenzyme A hydrolase                                                                                                  | HIBCH                                             |       |
| 204767_s_at | 1.1  | flap structure-specific endonuclease 1                                                                                                    | FEN1                                              |       |
| 215125_s_at | 1    | UDP glycosyltransferase 1 family, polypeptide A9                                                                                          | UGT1A9                                            |       |
| 209580_s_at | 1    | methyl-CpG binding endonuclease                                                                                                           | MED1                                              |       |
| 202589_at   | 1    | thymidylate synthetase                                                                                                                    | TYMS                                              |       |
| 204646_at   | -1   | dihydropyrimidine dehydrogenase                                                                                                           | DPYD                                              |       |
| 214088_s_at | -1   | fucosyltransferase 3 (galactoside 3(4)-L-fucosyltransferase, Lewis blood group included)                                                  | FUT3                                              |       |
| 211548_s_at | -1   | NAD+-dependent 15-hydroxyprostaglandin dehydrogenase                                                                                      | PGDH                                              |       |
| 221304_at   | -1   | UDP glycosyltransferase 1 family, polypeptide A8                                                                                          | UGT1A8                                            |       |
| 216203_at   | -1   | palmitoyltransferase                                                                                                                      | LCB2                                              |       |
| 203895_at   | -1   | phospholipase C, beta 4                                                                                                                   | PLCB4                                             |       |
| 205111_s_at | -1.7 | pancreas-enriched phospholipase C                                                                                                         | LOC51196                                          |       |
| 209392_at   | -2   | -1.7                                                                                                                                      | Human autotaxin mRNA                              | ENPP2 |
| 221240_s_at | -1   | beta-1,3-N-acetylglucosaminyltransferase bGn-T4                                                                                           | B3GN-T4                                           |       |
| 219773_at   | -1   | NADPH oxidase 4                                                                                                                           | NOX4                                              |       |
| 220929_at   | -1   | UDP-N-acetyl-alpha-D-galactosamine:polypeptide N-acetylglucosaminyltransferase 8 (GalNAc-T8)                                              | GALNT8                                            |       |
| 218313_s_at | -1.1 | UDP-N-acetyl-alpha-D-galactosamine:polypeptide N-acetylglucosaminyltransferase 7 (GalNAc-T7)                                              | GALNT7                                            |       |
| 211673_s_at | -1   | molybdenum cofactor biosynthesis protein A and molybdenum cofactor biosynthesis protein C mRNA                                            |                                                   |       |
| 205752_s_at | -1   | -1.2                                                                                                                                      | glutathione S-transferase M5                      | GSTM5 |
| 203914_x_at | -1.1 | hydroxyprostaglandin dehydrogenase 15-(NAD)                                                                                               | HPGD                                              |       |
| 208591_s_at | -1.1 | phosphodiesterase 3B, cGMP-inhibited                                                                                                      | PDE3B                                             |       |
| 214091_s_at | -1.1 | glutathione peroxidase 3 (plasma)                                                                                                         | GPX3                                              |       |
| 206212_at   | -1.1 | carboxypeptidase A2 (pancreatic)                                                                                                          | CPA2                                              |       |
| 202422_s_at | -1.1 | fatty-acid-Coenzyme A ligase, long-chain 4                                                                                                | FACL4                                             |       |
| 221062_at   | -1.2 | heparan sulfate (glucosamine) 3-O-sulfotransferase 3B1                                                                                    | HS3ST3B1                                          |       |
| 221416_at   | -1.2 | phospholipase A2, group IIF                                                                                                               | PLA2G2F                                           |       |
| 215095_at   | -1.3 | esterase D-formylglutathione hydrolase                                                                                                    | ESD                                               |       |
| 209009_at   | 1.1  | Similar to esterase 10                                                                                                                    | ESD                                               |       |
| 211387_x_at | -1.3 | mRNA capping enzyme                                                                                                                       | hCAP1b                                            |       |
| 205333_s_at | -1.3 | prenyl protein protease RCE1B                                                                                                             | RCE1B                                             |       |
| 220446_s_at | -1.3 | carbohydrate (N-acetylglucosamine 6-O) sulfotransferase 4                                                                                 | CHST4                                             |       |
| 206792_x_at | -1.3 | phosphodiesterase 4C, cAMP-specific (dunce (Drosophila)-homolog phosphodiesterase E1)                                                     | PDE4C                                             |       |
| 203549_s_at | -1.3 | lipoprotein lipase                                                                                                                        | LPL                                               |       |
| 204154_at   | -1.4 | -1.1                                                                                                                                      | cysteine dioxygenase, type I                      | CDO1  |
| 221764_at   | 1.3  | glycerol-3-phosphate dehydrogenase 1 (soluble)                                                                                            | GPD1                                              |       |
| 204881_s_at | 1.1  | UDP-glucose ceramide glucosyltransferase                                                                                                  | UGCG                                              |       |
| 205480_s_at | 1.6  | UDP-glucose pyrophosphorylase 2                                                                                                           | UGP2                                              |       |
| 213882_at   | 3.2  | glucose phosphate isomerase                                                                                                               | GPI                                               |       |
| 213093_at   | -1.4 | glucose-6-phosphate dehydrogenase                                                                                                         | G6PD                                              |       |
| 220979_s_at | -1.5 | similar to sialyltransferase 7 ((alpha-N-acetylneuraminyl 2,3-betagalactosyl-1,3)-N-acetyl galactosaminide alpha-2,6-sialyltransferase) E | MGC3184                                           |       |
| 213936_x_at | -1.5 | N-acylsphingosine amidohydrolase (acid ceramidase)-like                                                                                   | ASAHL                                             |       |
| 205351_at   | -1.5 | gamma-glutamyl carboxylase                                                                                                                | GGCX                                              |       |
| 215743_at   | -1.5 | ribonuclease P (38kD)                                                                                                                     | RPP38                                             |       |
| 207303_at   | -1.5 | phosphodiesterase 1C, calmodulin-dependent (70kD)                                                                                         | PDE1C                                             |       |
| 209919_x_at | -1.5 | gamma-glutamyl transpeptidase                                                                                                             | GGT1                                              |       |
| 211207_s_at | -1.5 | long-chain acyl-CoA synthetase 5                                                                                                          | LACS5                                             |       |
| 209420_s_at | -1.5 | acid sphingomyelinase                                                                                                                     | ASM                                               |       |
| 205066_s_at | -1.6 | -2.1                                                                                                                                      | ectonucleotide pyrophosphatasephosphodiesterase 1 | ENPP1 |

|             |      |      |                                                                                                                                          |           |
|-------------|------|------|------------------------------------------------------------------------------------------------------------------------------------------|-----------|
| 210839_s_at | -1.6 |      | phosphodiesterase I alpha                                                                                                                | ENPP2     |
| 218322_s_at | -1.6 |      | long-chain fatty acid coenzyme A ligase 5                                                                                                | FACL5     |
| 214582_at   | -1.6 | -1.6 | 2,3-cyclic nucleotide 3 phosphodiesterase                                                                                                | CNP       |
| 204869_at   | -1.6 | -1.7 | proprotein convertase subtilisin/kexin type 2                                                                                            | PCSK2     |
| 201785_at   | -1.7 |      | ribonuclease, RNase A family, 1 (pancreatic)                                                                                             | RNASE1    |
| 205174_s_at | -1.8 |      | glutamyl-peptide cyclotransferase (glutamyl cyclase)                                                                                     | QPCT      |
| 204836_at   | -2   | -1.9 | glycine dehydrogenase (decarboxylating; glycine decarboxylase, glycine cleavage system protein P)                                        | GLDC      |
| 200832_s_at | -2   |      | Scd mRNA for stearoyl-CoA desaturase                                                                                                     | Scd       |
| 205338_s_at | -2.2 |      | dopachrome tautomerase (dopachrome delta-isomerase, tyrosine-related protein 2)                                                          | DCT       |
| 205337_at   | -2.5 | -1.2 | dopachrome tautomerase (dopachrome delta-isomerase, tyrosine-related protein 2)                                                          | DCT       |
| 216512_s_at | -1.1 |      | dopachrome tautomerase (dopachrome delta-isomerase, tyrosine-related protein 2)                                                          | DCT       |
| 207016_s_at | -2.2 | -2   | Homo sapiens mRNA for RALDH2-T, complete cds.                                                                                            | RALDH2    |
| 210147_at   | -2.3 | -2.6 | mono-ADP-ribosyltransferase                                                                                                              | htMART    |
| 206465_at   | -2.3 | -3.5 | very long-chain acyl-CoA synthetase; lipidosis                                                                                           | KIAA0631  |
| 206214_at   | -3.1 |      | phospholipase A2, group VII (platelet-activating factor acetylhydrolase, plasma)                                                         | PLA2G7    |
| 211264_at   | -5   |      | glutamate decarboxylase                                                                                                                  | GAD65     |
| 201014_s_at | 1.4  | 2    | multifunctional polypeptide similar to SAICARsynthetase and AIR carboxylase                                                              | ADE2H1    |
| 200883_at   | 1.4  | 1    | ubiquinol-cytochrome c reductase core protein II                                                                                         | UQCRC2    |
| 208909_at   |      | 1    | ubiquinol-cytochrome c reductase, Rieske iron-sulfur polypeptide 1                                                                       | UQCRCFS1  |
| 209699_x_at | 1    |      | dihydrodiol dehydrogenase                                                                                                                | AKR1C2    |
| 214421_x_at | -1   |      | cytochrome P450, subfamily IIC (mephenytoin 4-hydroxylase), polypeptide 9                                                                | UCC9      |
| 216025_x_at | -1.1 |      | cytochrome P450, subfamily IIC (mephenytoin 4-hydroxylase), polypeptide 9 / Human cytochrome P-450 S-mephenytoin 4-hydroxylase (P-450mp) | CYP2C9    |
| 214610_at   | -1.1 | -1.3 | cytochrome P450, subfamily XIB (steroid 11-beta-hydroxylase), polypeptide 1                                                              | CYP11B1   |
| 202437_s_at | -3.5 | -2.7 | cytochrome P450, subfamily I (dioxin-inducible), polypeptide 1 (glaucoma 3, primary infantile)                                           | CYP1B1    |
| 202435_s_at | -2.3 |      | cytochrome P450, subfamily I (dioxin-inducible), polypeptide 1 (glaucoma 3, primary infantile)                                           | CYP1B1    |
| 202436_s_at | -2.2 | -1.2 | cytochrome P450, subfamily I (dioxin-inducible), polypeptide 1 (glaucoma 3, primary infantile)                                           | CYP1B1    |
| 210816_s_at | -1.3 |      | Similar to cytochrome b-561                                                                                                              | CYB561    |
| 203923_s_at | -1.4 |      | cytochrome b-245, beta polypeptide (chronic granulomatous disease)                                                                       | CYBB      |
| 207608_x_at | -1.6 |      | cytochrome P450, subfamily I (aromatic compound-inducible), polypeptide 2                                                                | CYP1A2    |
| 205998_x_at | -1.4 |      | cytochrome P450, subfamily IIIA (niphedipine oxidase), polypeptide 4                                                                     | CYP3A4    |
| 210576_at   |      | -2.6 | cytochrome P450                                                                                                                          | CYP4F8    |
| 219565_at   |      | 2.2  | cytochrome P450 monooxygenase                                                                                                            | LOC57404  |
| 216696_s_at | -1.7 |      | kidney and liver proline oxidase 1                                                                                                       | HSPOX1    |
| 201117_s_at | -1.9 | -1.3 | carboxypeptidase E precursor                                                                                                             | CPE       |
| 200968_s_at |      | 3.7  | peptidylprolyl isomerase B (cyclophilin B)                                                                                               | PP1B      |
| 208629_s_at |      | 3.1  | hydroxyacyl-Coenzyme A dehydrogenase3-ketoacyl-Coenzyme A thiolaseenoyl-Coenzyme A hydratase (trifunctional protein), alpha subunit      | HADHA     |
| 203128_at   |      | 2.9  | serine palmitoyltransferase, long chain basesubunit 2                                                                                    | SPTLC2    |
| 212995_x_at |      | 2.6  | phosphoglycerate dehydrogenase                                                                                                           | PHGDH     |
| 203803_at   |      | 2    | prenylcysteine lyase                                                                                                                     | PCL1      |
| 217933_s_at |      | 1.7  | leucine aminopeptidase                                                                                                                   | LOC51056  |
| 203219_s_at |      | 1.7  | adenine phosphoribosyltransferase                                                                                                        | APRT      |
| 207076_s_at |      | 1.6  | argininosuccinate synthetase                                                                                                             | ASS       |
| 201923_at   |      | 1.3  | thioredoxin peroxidase (antioxidant enzyme)                                                                                              | AOE372    |
| 202554_s_at |      | 1.3  | glutathione S-transferase M3 (brain)                                                                                                     | GSTM3     |
| 203560_at   |      | 1.2  | gamma-glutamyl hydrolase (conjugase,folypolypolyglutamyl hydrolase) precursor                                                            | GGH       |
| 203228_at   |      | 1.2  | platelet-activating factor acetylhydrolase, isoform Ib, gamma subunit (29kD)                                                             | PAFAH1B3  |
| 200848_at   |      | 1.2  | S-adenosylhomocysteine hydrolase-like 1                                                                                                  | AHCYL1    |
| 202619_s_at |      | 1.2  | procollagen-lysine, 2-oxoglutarate 5-dioxygenase (lysine hydroxylase) 2                                                                  | PLOD2     |
| 202532_s_at |      | 1.1  | dihydrofolate reductase                                                                                                                  | DHFR      |
| 214045_at   |      | 1.1  | lipoic acid synthetase                                                                                                                   | LAS       |
| 217995_at   |      | 1    | CGI-44 protein; sulfide dehydrogenase like (yeast) (CGI-44)                                                                              | CGI-44    |
| 219932_at   |      | 1    | very long-chain acyl-CoA synthetase homolog 1                                                                                            | VLCS-H1   |
| 201030_x_at |      | 1    | lactate dehydrogenase B                                                                                                                  | LDHB      |
| 212360_at   |      | -1   | adenosine monophosphate deaminase 2 (isoform L)                                                                                          | AMPD2     |
| 203188_at   |      | -1   | i-beta-1,3-N-acetylglucosaminyltransferase                                                                                               | BETA3GNT1 |
| 213591_at   |      | -1.1 | aldehyde dehydrogenase 7 family, member A1                                                                                               | ALDH7A1   |
| 208951_at   | 1    |      | Homo sapiens, antiqitiin 1, clone MGC:1569, mRNA, complete cds.                                                                          | ALDH7A1   |
| 220148_at   |      | -1.3 | aldehyde dehydrogenase 12                                                                                                                | ALDH12    |
| 213736_at   |      | -1.4 | cytochrome c oxidase subunit Vb                                                                                                          | COX5B     |
| 203551_s_at |      | -1.2 | COX11 (yeast) homolog, cytochrome c oxidase assembly protein                                                                             | COX11     |
| 204067_at   |      | -1.3 | sulfite oxidase                                                                                                                          | SUOX      |
| 222011_s_at |      | -1.3 | acetyl-Coenzyme A acetyltransferase 2 (acetoacetyl Coenzyme A thiolase)                                                                  | ACAT2     |
| 206720_at   |      | -1.5 | alpha-1,3(6)-mannosylglycoproteinbeta-1,6-N-acetyl-glucosaminyltransferase                                                               | MGAT5     |
| 213705_at   |      | -1.5 | methionine adenosyltransferase II, alpha                                                                                                 | MAT2A     |
| 205083_at   |      | -1.6 | aldehyde oxidase 1                                                                                                                       | AOX1      |
| 206037_at   |      | -1.8 | cysteine conjugate-beta lyase; cytoplasmic (glutamine transaminase K, kynurenine aminotransferase)                                       | CCBL1     |
| 200762_at   | -1.9 | -1.9 | dihydropyrimidinase-like 2                                                                                                               | DPYSL2    |
| 201431_s_at | -1.4 |      | dihydropyrimidinase-like 3                                                                                                               | DPYSL3    |
| 202218_s_at |      | -1.9 | delta-6 fatty acid desaturase                                                                                                            | FADS5D6   |
| 204294_at   |      | -2   | aminomethyltransferase (glycine cleavage systemprotein T)                                                                                | AMT       |
| 201791_s_at |      | -2   | 7-dehydrocholesterol reductase                                                                                                           | DHCR7     |
| 209613_s_at |      | -2   | alcohol dehydrogenase 2 (class I), beta polypeptide                                                                                      | ADH2      |
| 204515_at   |      | -2.3 | hydroxy-delta-5-steroid dehydrogenase, 3 beta-and steroid delta-isomerase 1                                                              | HSD3B1    |
| 205404_at   |      | -2.3 | hydroxysteroid (11-beta) dehydrogenase 1                                                                                                 | HSD11B1   |
| 219429_at   |      | -2.4 | fatty acid hydroxylase                                                                                                                   | FAAH      |
| 205307_s_at |      | -2.4 | kynurenine 3-monooxygenase (kynurenine 3-hydroxylase)                                                                                    | KMO       |
| 219799_s_at |      | -3   | retinol dehydrogenase homolog                                                                                                            | RHDL      |
| 218967_s_at |      | 1.5  | phosphotriesterase related                                                                                                               | PTER      |
| 205370_x_at | -1.2 |      | dihydroliipoamide branched chain transacylase (E2 component of branched chain keto acid dehydrogenasecomplex; maple syrup urine disease) | DBT       |
| 204572_s_at |      | -1.2 | protein (peptidyl-prolyl cistrans isomerase)NIMA-interacting, 4 (parvulin)                                                               | PIN4      |
| 206643_at   | -2.1 |      | histidine ammonia-lyase                                                                                                                  | HAL       |

|                        |      |      |                                                                                                  |              |
|------------------------|------|------|--------------------------------------------------------------------------------------------------|--------------|
| 202499_s_at            | -1   |      | solute carrier family 2 (facilitated glucose transporter), member 3                              | SLC2A3       |
| 200978_at              | 1.8  |      | malate dehydrogenase 1, NAD (soluble)                                                            | MDH1         |
| 217990_at              | 3.1  |      | Homo sapiens GMPR2 for guanosine monophosphate reductase isolog (LOC51292), mRNA                 | LOC51292     |
| 211416_x_at            | -1.1 |      | gamma-glutamyl transpeptidase                                                                    | GGT1         |
| 209218_at              | 1.1  |      | squalene epoxidase                                                                               | ERG1         |
| 208864_s_at            | 1    | 1    | Homo sapiens thioredoxin mRNA, complete cds.                                                     | TXN          |
| 220452_x_at            | -1.1 |      | cytochrome c-like antigen                                                                        | CYCL         |
| 210686_x_at            | -1.1 |      | cytochrome c-like antigen                                                                        |              |
| 210830_s_at            |      | 1.7  | paraoxonase                                                                                      | PON2         |
| 208940_at              |      | 1.2  | SELENOPHOSPHATE SYNTHETASE ; Human selenium donor protein                                        | SPS          |
| 218671_s_at            | 1.1  |      | ATPase inhibitor precursor                                                                       | LOC51189     |
| 220671_at              | -1.3 |      | CCR4-like (carbon catabolite repression 4, S.cerevisiae)                                         | CCRN4L       |
| 204416_x_at            | -1.9 |      | apolipoprotein C-I                                                                               | APOC1        |
| 212884_x_at            | -1.1 |      | apolipoprotein E                                                                                 | APOE         |
| 221013_s_at            | -1.3 |      | apolipoprotein L, 2                                                                              | APOL2        |
| 201339_s_at            | 1    |      | sterol carrier protein 2                                                                         | SCP2         |
| 215695_s_at            | -1.9 |      | glycogenin-2 delta                                                                               | glycogenin-2 |
| 210959_s_at            | -1.4 |      | steroid-5-alpha-reductase isoform                                                                | SRD5A1       |
| 218301_at              | -1.3 |      | arginyl aminopeptidase (aminopeptidase B)-like1                                                  | RNPEPL1      |
| 212221_x_at            | -1.2 |      | popeye protein 3                                                                                 | POP3         |
| 213060_s_at            | -1.1 |      | chitinase                                                                                        | HUMTCHIT     |
| 206227_at              | -1.1 |      | Homo sapiens cartilage intermediate layer protein, nucleotide pyrophosphohydrolase (CILP), mRNA. | CLIP         |
| 209154_at              | -1   |      | glutaminase-interacting protein 3                                                                | TIP-1        |
| 206958_s_at            | 1    |      | UPF3                                                                                             | UPF3         |
| 218197_s_at            | 1    |      | oxidation resistance 1                                                                           | OXR1         |
| 204143_s_at            | 1.1  |      | rTS beta protein                                                                                 | HSRSTBETA    |
| 218729_at              | 1.1  |      | latexin protein                                                                                  | LXN          |
| 201455_s_at            | 1.3  |      | puromycin sensitive aminopeptidase                                                               | NPEPPS       |
| 201454_s_at            | 1.4  |      | aminopeptidase puromycin sensitive                                                               | NPEPPS       |
| 213026_at              | 1.4  |      | Apg12 (autophagy 12, S. cerevisiae)-like                                                         | APG12L       |
| 213496_at              | -1.9 | -1.3 | KIAA0455 gene product                                                                            | KIAA0455     |
| <i>Melanogenesis</i>   |      |      |                                                                                                  |              |
| 206426_at              | -1   | -1.5 | melan-A                                                                                          | MLANA        |
| 206427_s_at            | -1.8 | -1.3 | differentiation antigen melan-A protein                                                          | MLANA        |
| 207233_s_at            | -1.8 |      | microphthalmia-associated transcription factor                                                   | MITF         |
| 205694_at              | -2.3 | -1.5 | tyrosinase-related protein 1                                                                     | TYRP1        |
| 206630_at              | -2.1 |      | tyrosinase (oculocutaneous albinism IA)                                                          | TYR          |
| 209848_s_at            | -1.7 |      | me20m                                                                                            | SILV         |
| <i>Ion Homeostasis</i> |      |      |                                                                                                  |              |
| 203296_s_at            | -1.2 |      | ATPase, Na+K+ transporting, alpha 2 (+) polypeptide                                              | ATP1A2       |
| 207546_at              | -1.5 |      | ATPase, H+K+ exchanging, beta polypeptide                                                        | ATP4B        |
| 205198_s_at            | -1.3 |      | ATPase, Cu++ transporting, alpha polypeptide (Menkes syndrome)                                   | ATP7A        |
| 204624_at              | -1.1 |      | ATPase, Cu++ transporting, beta polypeptide (Wilson disease)                                     | ATP7B        |
| 203908_at              | -1.7 |      | solute carrier family 4, sodium bicarbonate cotransporter, member 4                              | SLC4A4       |
| 209884_s_at            | -1.5 |      | sodium bicarbonate cotransporter 3                                                               | SLC4A7       |
| 204404_at              | -1   |      | solute carrier family 12 (sodiumpotassiumchloride transporters), member 2                        | SLC12A2      |
| 220740_s_at            | -1.4 |      | solute carrier family 12 (potassiumchloride transporters), member 6                              | SLC12A6      |
| 207308_at              | -2.1 |      | solute carrier family 21 (organic anion transporter), member 3                                   | SLC21A3      |
| 220867_s_at            | -1.2 | -1   | solute carrier family 24 (sodiumpotassiumcalcium exchanger), member 2                            | SLC24A2      |
| 220475_at              | -1.5 |      | concentrative Na+-nucleoside cotransporter                                                       | CNT3         |
| 207408_at              | -1.5 |      | organic cationic transporter-like 4                                                              | ORCTL4       |
| 210286_s_at            | -2.1 |      | bicarbonate transporter                                                                          | BT           |
| 200748_s_at            |      | 1.7  | ferritin, heavy polypeptide 1                                                                    | FTH1         |
| 217897_at              | -1.4 | -1.6 | FXYP domain-containing ion transport regulator 6                                                 | FXYP6        |
| 210078_s_at            |      | -1.6 | (clone hKvBeta3) K+ channel beta subunit                                                         | KCNAB1       |
| 221372_s_at            |      | -1.8 | purinergic receptor P2X, ligand-gated ionchannel, 2                                              | P2RX2        |
| 220551_at              | -1.7 |      | differentiation-associated Na-dependent inorganic phosphate cotransporter                        | DNPI         |
| 206306_at              | -1.6 |      | ryanodine receptor 3                                                                             | RYR3         |
| 209620_s_at            | 1.9  |      | ABC transporter 7 protein                                                                        | hABC7        |
| 203903_s_at            | -1.2 | -1.8 | hephaestin                                                                                       | HEPH         |
| 217165_x_at            |      | 1.6  | metallothionein 1F (functional)                                                                  | MT1F         |
| 204745_x_at            |      | 1.1  | metallothionein 1G                                                                               | MT1G         |
| 211330_s_at            | -1.2 |      | Homo sapiens hemochromatosis splice variant delE3 mRNA, complete cds.                            | HFE          |
| 207568_at              |      | -1.1 | cholinergic receptor, nicotinic, alphapolypeptide 6                                              | CHRNA6       |
| 210739_x_at            | -1.3 |      | sodium bicarbonate cotransporter                                                                 | NBC          |
| <i>RNA Metabolism</i>  |      |      |                                                                                                  |              |
| 204766_s_at            | 3.7  | 3.3  | nudix (nucleoside diphosphate linked moietyX)-type motif 1                                       | NUDT1        |
| 206302_s_at            |      | -1.1 | nudix (nucleoside diphosphate linked moietyX)-type motif 4                                       | NUDT4        |
| 220183_s_at            | 2.4  | 3.7  | nudix (nucleoside diphosphate linked moietyX)-type motif 6                                       | NUDT6        |
| 218269_at              |      | -1   | putative ribonuclease III                                                                        | RNASE3L      |
| 222035_s_at            |      | 1.4  | poly(A) polymerase alpha                                                                         | PAPOLA       |
| 215136_s_at            | 1    |      | Opa-interacting protein 2                                                                        | OIP2         |
| 203594_at              | 1    |      | RNA 3-terminal phosphate cyclase                                                                 | RPC          |
| <i>tRNA synthesis</i>  |      |      |                                                                                                  |              |
| 200841_s_at            |      | 2.5  | glutamyl-prolyl-tRNA synthetase                                                                  | EPRS         |
| 201263_at              |      | 1    | threonyl-tRNA synthetase                                                                         | TARS         |
| 209252_at              | 1.2  |      | histidyl-tRNA synthetase homolog                                                                 | HO3          |

#### Intracellular Vesicular Traffic and Protein Sorting

|             |      |      |                                                                     |          |
|-------------|------|------|---------------------------------------------------------------------|----------|
| 201831_s_at | 3.1  | 4.4  | vesicle docking protein p115                                        | P115     |
| 200900_s_at | 2.8  | 1.4  | mannose-6-phosphate receptor (cation dependent)                     | M6PR     |
| 214336_s_at | -1   |      | coatamer protein complex, subunit alpha                             | COPA     |
| 201358_s_at |      | -1.2 | coatamer protein complex, subunit beta                              | COPB     |
| 203106_s_at | -1   |      | vacuolar protein sorting 41 (yeast homolog)                         | VP541    |
| 204324_s_at | -1.8 |      | type II Golgi membrane protein                                      | GPP130   |
| 201273_s_at |      | 1.6  | signal recognition particle 9kD                                     | SRP9     |
| 216296_at   | -1.4 |      | H.sapiens clathrin light chain a gene.                              |          |
| 209167_at   | -2   |      | glycoprotein M6B                                                    | GPM6B    |
| 209168_at   | -1.5 | -1.3 | glycoprotein M6B                                                    | GPM6B    |
| 209169_at   | -1.9 |      | glycoprotein M6B                                                    | GPM6B    |
| 209170_s_at | -2.5 | -1.7 | glycoprotein M6B                                                    | m6b1     |
| 203484_at   |      | 1.6  | Homo sapiens Sec61 gamma                                            | SEC61G   |
| 202113_s_at |      | 3.1  | sorting nexin 2                                                     | SNX2     |
| 213206_at   |      | -1.2 | golgi SNAP receptor complex member 2                                | GOSR2    |
| 213212_x_at |      | -1.3 | golgin-67                                                           | KIAA0855 |
| 212807_s_at | -1.4 |      | sortilin 1                                                          | SORT1    |
| 204840_s_at |      | 1    | early endosome antigen 1, 162kD                                     | EEA1     |
| 212417_at   |      | 1    | secretory carrier membrane protein 1                                | SCAMP1   |
| 212425_at   |      | -1.2 | secretory carrier membrane protein 1                                | SCAMP1   |
| 218143_s_at | -1.1 |      | secretory carrier membrane protein 2                                | SCAMP2   |
| 201176_s_at |      | 2.5  | archain                                                             | ARCN1    |
| 201278_at   | -1.9 |      | disabled (Drosophila) homolog 2 (mitogen-responsive phosphoprotein) | DAB2     |
| 209558_s_at |      | -1.9 | HIP1R                                                               | HIP1R    |
| 210293_s_at |      | -1   | Sec23 (S. cerevisiae) homolog B                                     | SEC23B   |
| 207707_s_at |      | 1    | SEC13 (S. cerevisiae)-like 1                                        | SEC13L1  |
| 221504_s_at |      | 1.3  | Vacuolar proton pump subunit SFD alpha isoform                      | LOC51606 |

#### Protein Secretion/ Secreted Proteins / Hormone related

|             |      |      |                                                                                                                                        |        |
|-------------|------|------|----------------------------------------------------------------------------------------------------------------------------------------|--------|
| 206639_x_at | -1.7 |      | histatin 1                                                                                                                             | HTN1   |
| 216341_s_at | -1.7 | -1.4 | gonadotropin-releasing hormone receptor                                                                                                | GNRHR  |
| 211753_s_at | -1.6 |      | relaxin 1 (H1)                                                                                                                         |        |
| 201859_at   | -1.6 | -1.1 | proteoglycan 1, secretory granule                                                                                                      | PRG1   |
| 202546_at   | 1    | 3.2  | vesicle-associated membrane protein 8 (endobrevin)                                                                                     | VAMP8  |
| 206382_s_at |      | -2.6 | Homo sapiens brain-derived neurotrophic factor                                                                                         | BDNF   |
| 210195_s_at | -1   |      | Human pregnancy-specific beta-1-glycoprotein mRNA PSG95, complete cds.                                                                 | PSG1   |
| 210355_at   | -1.8 |      | Human, parathyroid-like protein (associated with humoral hypercalcemia of malignancy)                                                  | PTH1H  |
| 213456_at   | -1.5 |      | DKFZP564D206                                                                                                                           |        |
| 205609_at   | -2.1 |      | angiopoietin 1                                                                                                                         | ANGPT1 |
| 206509_at   | -3.9 |      | prolactin-induced protein                                                                                                              | PIP    |
| 202205_at   | -4   |      | vasodilator-stimulated phosphoprotein                                                                                                  | VASP   |
| 206378_at   |      | -5.1 | mammaglobin 1                                                                                                                          | MGB1   |
| 203666_at   | -1.1 |      | stromal cell-derived factor 1                                                                                                          | SDF1   |
| 202957_at   | -1.1 |      | hematopoietic cell-specific Lyn substrate 1                                                                                            | HCLS1  |
| 215599_at   | -1.7 |      | H.sapiens SMA4 mRNA.                                                                                                                   | SMA4   |
| 222043_at   |      | -1.2 | clusterin (complement lysis inhibitor, SP-40,40, sulfated glycoprotein 2, testosterone-repressed prostate message 2, apolipoprotein J) | CLU    |

#### Thyroid Hormone Related

|           |      |      |                                                                               |        |
|-----------|------|------|-------------------------------------------------------------------------------|--------|
| 205489_at | -1   | -1.5 | crystallin, mu                                                                | CRYM   |
| 212544_at |      | 1.9  | thyroid hormone receptor interactor 3                                         | TRIP3  |
| 202734_at | -1.2 |      | thyroid hormone receptor interactor 10                                        | TRIP10 |
| 1316_at   | -1.4 |      | Homo sapiens mRNA for thyroid hormone receptor alpha 1 THRA1, (c-erbA-1 gene) |        |

#### Estrogen related

|             |  |      |                                                                                  |       |
|-------------|--|------|----------------------------------------------------------------------------------|-------|
| 204278_s_at |  | 1.6  | Homo sapiens estrogen receptor binding site associated, antigen, 9 (EBAG9), mRNA | EBAG9 |
| 207981_s_at |  | -2.4 | Homo sapiens estrogen-related receptor gamma (ESRRG), mRNA.                      | ESRRG |

#### Lysosomes

|             |  |      |                                                                                               |          |
|-------------|--|------|-----------------------------------------------------------------------------------------------|----------|
| 201089_at   |  | 1.2  | ATPase, H+ transporting, lysosomal (vacuolarproton pump), beta polypeptide, 5658kD, isoform 2 | ATP6B2   |
| 208737_at   |  | 1.2  | ATPase, H+ transporting, lysosomal (vacuolarproton pump), member J                            | ATP6J    |
| 213728_at   |  | 1.1  | lysosomal-associated membrane protein 1                                                       | LAMP1    |
| 201552_at   |  | 1.9  | lysosomal-associated membrane protein 1                                                       | LAMP1    |
| 213650_at   |  | -1   | golgin-67                                                                                     | KIAA0855 |
| 213275_x_at |  | -1.4 | cathepsin B                                                                                   | CTSB     |
| 213274_s_at |  | -1.1 | cathepsin B                                                                                   | CTSB     |
| 203758_at   |  | 1    | cathepsin O                                                                                   | CTSO     |

#### Endoplasmic Reticulum

|             |  |     |                                                         |       |
|-------------|--|-----|---------------------------------------------------------|-------|
| 211936_at   |  | 1.1 | endoplasmic reticulum lumenal Ca2+ bindingprotein grp78 | HSPA5 |
| 208689_s_at |  | 1.9 | ribophorin II                                           | RPN2  |

#### Related with Blood Cells & Serum

|             |      |      |                                                         |       |
|-------------|------|------|---------------------------------------------------------|-------|
| 214414_x_at | -2.7 | -2.2 | hemoglobin, alpha 1                                     | HBA1  |
| 211745_x_at | -1.8 |      | hemoglobin, alpha 2                                     |       |
| 204848_x_at | -2.3 |      | hemoglobin, gamma A                                     | HGB1  |
| 204419_x_at | -2.2 |      | hemoglobin, gamma G                                     | HGB2  |
| 218450_at   |      | 1.6  | heme-binding protein                                    | HEBP  |
| 211696_x_at | -1.3 |      | beta globin chain variant                               | HBB   |
| 204505_s_at | -1.7 |      | erythrocyte membrane protein band 4.9 (dematin)         | EPB49 |
| 40093_at    |      | -1.4 | H.sapiens LU gene for Lutheran blood group glycoprotein |       |

*Related with Coagulation*

|             |      |      |                                                                                |       |
|-------------|------|------|--------------------------------------------------------------------------------|-------|
| 209676_at   | -1.4 |      | tissue factor pathway inhibitor (lipoprotein-associated coagulation inhibitor) | TFPI  |
| 203305_at   |      | -3.5 | coagulation factor XIII, A1 polypeptide                                        | F13A1 |
| 203888_at   | 1.1  |      | thrombomodulin                                                                 | THBD  |
| 203989_x_at | -1.2 |      | coagulation factor II (thrombin) receptor                                      | F2R   |

*Others*

|             |      |     |                                |     |
|-------------|------|-----|--------------------------------|-----|
| 216231_s_at |      | 1.9 | beta-2-microglobulin           | B2M |
| 207096_at   | -1.4 |     | serum amyloid A4, constitutive |     |

**Related with Neurons, Neurogenesis & Diseases related to nervous system**

|             |      |      |                                                                                        |          |
|-------------|------|------|----------------------------------------------------------------------------------------|----------|
| 207135_at   | -1.2 |      | 5-hydroxytryptamine (serotonin) receptor 2A                                            | HTR2A    |
| 207577_at   | -1.1 |      | serotonin receptor 5-HT4 (splice variant h5-HT4(b))                                    | htr4     |
| 203999_at   | -1.9 |      | synaptotagmin I                                                                        | SYT1     |
| 206161_s_at | -1   |      | synaptotagmin V                                                                        | SYT5     |
| 207594_s_at | -1   | -1.7 | synaptotagmin 1                                                                        | SYNJ1    |
| 210923_at   | -1.2 |      | solute carrier family 1 (glutamate transporter), member 7                              |          |
| 207184_at   | -1.1 | -1.5 | solute carrier family 6 (neurotransmitter transporter, GABA), member 13                | SLC6A13  |
| 219795_at   | -1.1 | -2.1 | solute carrier family 6 (neurotransmitter transporter), member 14                      | SLC6A14  |
| 213326_at   | -1.1 | -1.4 | vesicle-associated membrane protein 1 (synaptobrevin 1)                                | VAMP1    |
| 206525_at   | -2.2 |      | gamma-aminobutyric acid (GABA) receptor, rho 1                                         | GABRR1   |
| 208217_at   | -1.2 |      | gamma-aminobutyric acid (GABA) receptor, rho 2                                         | GABRR2   |
| 210247_at   | -1.3 | -1   | synapsin II                                                                            | SYN2     |
| 202508_s_at | -1.7 |      | synaptosomal-associated protein, 25kD                                                  | SNAP25   |
| 206740_x_at | -1.9 |      | synaptonemal complex protein 1                                                         | SYCP1    |
| 216021_s_at | -1.7 |      | glycine receptor, alpha 3                                                              | GLRA3    |
| 209890_at   |      | 2.2  | tetraspan NET-4                                                                        | TSPAN-5  |
| 205440_s_at | 1.2  |      | neuropeptide Y receptor Y1                                                             | NPY1R    |
| 210198_s_at | -1.5 |      | proteolipid protein (Pelizaeus-Merzbacherdisease, spastic paraplegia 2, uncomplicated) | PLP1     |
| 209693_at   |      | -1   | astroactin2                                                                            | ASTN2    |
| 202341_s_at |      | -1.9 | tripartite motif protein TRIM2                                                         | KIAA0517 |
| 208486_at   | -1.1 |      | dopamine receptor D5                                                                   | DRD5     |
| 206023_at   | 1.2  |      | neuromedin U                                                                           | NMU      |
| 221127_s_at |      | -1.6 | regulated in glioma                                                                    | RIG      |
| 214247_s_at |      | -1   | regulated in glioma                                                                    | RIG      |
| 203899_s_at | -1   |      | calcitonin gene-related peptide-receptor component protein                             | CGRP-RCP |
| 203898_at   | -1.1 |      | calcitonin gene-related peptide-receptor component protein                             | CGRP-RCP |
| 206953_s_at | -1   | -1.6 | latrophilin                                                                            | KIAA0786 |
| 206251_s_at | -1.1 |      | arginine vasopressin receptor 1A                                                       | AVPR1A   |
| 205475_at   | -1.2 |      | scrapie responsive protein 1                                                           | SCRG1    |
| 205893_at   | -1.2 |      | neuroigin 1                                                                            | NLGN1    |
| 210136_at   |      | 1.8  | myelin basic protein                                                                   | MBP      |
| 207545_s_at |      | -1.3 | numb (Drosophila) homolog                                                              | NUMB     |
| 208626_s_at |      | -1.1 | Similar to membrane protein of cholinergicsynaptic vesicles                            | VAT1     |
| 201860_s_at | -1.4 |      | plasminogen activator, tissue                                                          | PLAT     |
| 203413_at   | -1.3 |      | nel (chicken)-like 2                                                                   | NELL2    |
| 219511_s_at |      | -1.2 | Homo sapiens synuclein, alpha interacting protein (synphilin) (SNCAIP), mRNA.          | SNCAIP   |
| 221832_s_at |      | -1.1 | leucine zipper protein 1                                                               | LUZP1    |
| 220024_s_at |      | -1   | periaxin                                                                               | KIAA1620 |
| 211458_s_at |      | -1   | GABA-A receptor-associated protein                                                     |          |
| 204237_at   | -1.2 | -1   | CED-6 protein                                                                          | CED-6    |
| 214527_s_at |      | 1.4  | PQBP-1d                                                                                | PQBP1    |
| 214198_s_at |      | -1   | DiGeorge syndrome critical region gene 2                                               | DGCR2    |
| 213791_at   | -1.1 |      | proenkephalin                                                                          | PENK     |
| 202908_at   | -1.1 | -1.2 | Wolfram syndrome 1 (wolframin)                                                         | WFS1     |

*Alzheimer Related*

|             |      |      |                                                                                         |          |
|-------------|------|------|-----------------------------------------------------------------------------------------|----------|
| 204262_s_at | -1.2 |      | presenilin 2 isoform 1                                                                  | PSEN2    |
| 215148_s_at | -1.3 |      | amyloid beta (A4) precursor protein-binding, family A, member 3 (X11-like 2)            | APBA3    |
| 202268_s_at |      | 1.4  | Amyloid beta precursor protein-binding protein1                                         | APPBP1   |
| 207953_at   | -1.3 |      | neuronal thread protein AD7c-NTP                                                        | AD7C-NTP |
| 200602_at   |      | -1.2 | Homo sapiens amyloid beta (A4) precursor protein (protease nexin-II, Alzheimer disease) | APP      |

**Related to Myogenesis**

|             |      |      |                                                                                       |          |
|-------------|------|------|---------------------------------------------------------------------------------------|----------|
| 210944_s_at |      | -1.4 | Similar to calpain 3, (p94)                                                           | CAPN3    |
| 206707_x_at | -2.1 |      | PL48                                                                                  | C6ORF32  |
| 221152_at   |      | -5.1 | smooth muscle cell-expressed and macrophageconditioned medium-induced protein smag-64 | LOC57086 |
| 215295_at   | -1.6 |      | Homo sapiens mRNA for dystrobrevin B DTN-B2.                                          | DTN-B2   |

**Adipocytosis**

|           |      |      |                                         |       |
|-----------|------|------|-----------------------------------------|-------|
| 208998_at |      | -1.8 | uncoupling protein homolog              | UCPH  |
| 207175_at | -1.9 | -2.3 | adipose most abundant gene transcript 1 | APM1  |
| 212274_at |      | -1.5 | lipin 1                                 | LPIN1 |

**Peroxisome**

|           |      |      |                                                               |          |
|-----------|------|------|---------------------------------------------------------------|----------|
| 205160_at |      | -1.3 | peroxisomal biogenesis factor 11A                             | PEX11A   |
| 205246_at |      | 2.5  | peroxisome biogenesis factor 13                               | PEX13    |
| 207881_at | -1.8 |      | putative peroxisome microbody protein 175.1                   | LOC51051 |
| 210771_at | -3.9 |      | Similar to peroxisome proliferative activated receptor, alpha | PPARA    |
| 320_at    | -1.1 |      | mRNA for peroxisome assembly factor-2, complete cds           |          |

|                                     |      |      |                                                                                                                                                                                                                                                                                                                                         |          |
|-------------------------------------|------|------|-----------------------------------------------------------------------------------------------------------------------------------------------------------------------------------------------------------------------------------------------------------------------------------------------------------------------------------------|----------|
| 37152_at                            |      | -1.3 | peroxisome proliferator activated receptor mRNA                                                                                                                                                                                                                                                                                         |          |
| 203105_s_at                         | 1.4  |      | Homo sapiens dynamin 1-like (DNM1L), transcript variant 1, mRNA.                                                                                                                                                                                                                                                                        | DNM1L    |
| 219428_s_at                         | -1.1 |      | 24 kDa intrinsic membrane protein                                                                                                                                                                                                                                                                                                       | PMP24    |
| <b>Nuclear Export/Import</b>        |      |      |                                                                                                                                                                                                                                                                                                                                         |          |
| 211762_s_at                         | 1.1  |      | karyopherin alpha 2 (RAG cohort 1, importin alpha 1)                                                                                                                                                                                                                                                                                    |          |
| 213803_at                           |      | 1.2  | karyopherin (importin) beta 1                                                                                                                                                                                                                                                                                                           | KPNB1    |
| 221829_s_at                         | 1    |      | karyopherin (importin) beta 2                                                                                                                                                                                                                                                                                                           | KPNB2    |
| 209226_s_at                         |      | 1.5  | karyopherin beta2                                                                                                                                                                                                                                                                                                                       | KPNB2    |
| 211953_s_at                         |      | 1.2  | karyopherin (importin) beta 3                                                                                                                                                                                                                                                                                                           | KPNB3    |
| <b>Related to Nuclear Receptors</b> |      |      |                                                                                                                                                                                                                                                                                                                                         |          |
| 209105_at                           |      | 1.3  | nuclear receptor coactivator 1                                                                                                                                                                                                                                                                                                          | NCOA1    |
| 209060_x_at                         |      | 1.3  | nuclear receptor coactivator 3                                                                                                                                                                                                                                                                                                          | NCOA3    |
| 209061_at                           |      | 1    | nuclear receptor coactivator 3                                                                                                                                                                                                                                                                                                          | NCOA3    |
| 206645_s_at                         |      | -2.6 | nuclear receptor subfamily 0, group B, member 1                                                                                                                                                                                                                                                                                         | NROB1    |
| 209750_at                           |      | 2.7  | nuclear receptor subfamily 1, group D, member 2                                                                                                                                                                                                                                                                                         | NR1D2    |
| 210531_at                           | -1.6 |      | nuclear receptor subfamily 2, group C, member 1                                                                                                                                                                                                                                                                                         | NR2C1    |
| 209120_at                           |      | -1   | nuclear receptor subfamily 2, group F, member 2                                                                                                                                                                                                                                                                                         | NR2F2    |
| 216979_at                           | -1.5 |      | nuclear receptor                                                                                                                                                                                                                                                                                                                        | NR4A3    |
| <b>Other Nuclear Proteins</b>       |      |      |                                                                                                                                                                                                                                                                                                                                         |          |
| 208835_s_at                         | 1.1  |      | cisplatin resistance-associated overexpressed protein                                                                                                                                                                                                                                                                                   | LUC7A    |
| 221699_s_at                         | 1.2  |      | nucleolar protein GU2                                                                                                                                                                                                                                                                                                                   |          |
| 209088_s_at                         | -1.3 |      | ubiquitin 1                                                                                                                                                                                                                                                                                                                             | UBN1     |
| 200626_s_at                         |      | 1.4  | matrin 3                                                                                                                                                                                                                                                                                                                                | MATR3    |
| <b>Ataxin and Related Genes</b>     |      |      |                                                                                                                                                                                                                                                                                                                                         |          |
| 208833_s_at                         | 1.1  |      | Homo sapiens E46 protein mRNA, complete cds                                                                                                                                                                                                                                                                                             | E46L     |
| 222252_x_at                         | -1.4 |      | ataxin-1 ubiquitin-like interacting protein                                                                                                                                                                                                                                                                                             | A1U      |
| 221217_s_at                         | -2.5 |      | ataxin 2-binding protein 1                                                                                                                                                                                                                                                                                                              | A2BP1    |
| 205415_s_at                         |      | 1.6  | Machado-Joseph disease (spinocerebellar ataxia 3, olivopontocerebellar ataxia 3, autosomal dominant, ataxin 3)                                                                                                                                                                                                                          | MJD      |
| <b>Annexin and Related Genes</b>    |      |      |                                                                                                                                                                                                                                                                                                                                         |          |
| 201012_at                           |      | 1.4  | annexin I                                                                                                                                                                                                                                                                                                                               | ANXA1    |
| 208816_x_at                         |      | 1.8  | annexin A2 / Human lipocortin (LIP) 2 pseudogene mRNA, complete cds-like region                                                                                                                                                                                                                                                         | ANXA2    |
| <b>Miscellaneous</b>                |      |      |                                                                                                                                                                                                                                                                                                                                         |          |
| 218177_at                           | 1.4  |      | CHMP1.5 protein                                                                                                                                                                                                                                                                                                                         | CHMP1.5  |
| 202793_at                           | 2.6  |      | putative protein similar to nesy (Drosophila)                                                                                                                                                                                                                                                                                           | C3F      |
| 214804_at                           | 1.7  |      | FSH primary response (LRPR1, rat) homolog 1                                                                                                                                                                                                                                                                                             | FSHPRH1  |
| 213555_at                           | 1.6  |      | Human DNA sequence from clone 747H23 on chromosome 6q13-15. Contains the 3 part of the ME1 gene for malic enzyme 1, soluble (NADP-dependent malic enzyme, malate oxidoreductase, EC 1.1.1.40), a novel gene and the 5 part of the gene for N-acetylglucosamine-phosphate mutase. Contains ESTs, STSs, GSSs and two putative CpG islands |          |
| 201506_at                           | 1.2  | 1.3  | transforming growth factor, beta-induced, 68kD                                                                                                                                                                                                                                                                                          | TGFBI    |
| 204868_at                           | 1.3  |      | immature colon carcinoma transcript 1                                                                                                                                                                                                                                                                                                   | ICT1     |
| 202596_at                           | 1    |      | Homo sapiens, endosulfine alpha, clone MGC:8394, mRNA, complete cds.                                                                                                                                                                                                                                                                    | ENSA     |
| 211947_s_at                         |      | 3.8  | KIAA1096 protein                                                                                                                                                                                                                                                                                                                        | KIAA1096 |
| 209127_s_at                         |      | 2.5  | KIAA0156 gene product                                                                                                                                                                                                                                                                                                                   | KIAA0156 |
| 212650_at                           |      | 1.9  | KIAA0903 protein                                                                                                                                                                                                                                                                                                                        | KIAA0903 |
| 201462_at                           |      | 1.7  | KIAA0193 gene product                                                                                                                                                                                                                                                                                                                   | KIAA0193 |
| 211944_at                           |      | 1.4  | KIAA1096 protein                                                                                                                                                                                                                                                                                                                        | KIAA1096 |
| 201593_s_at                         |      | 1.4  | uncharacterized hypothalamus protein HT010                                                                                                                                                                                                                                                                                              | HT010    |
| 205003_at                           | -1.2 |      | KIAA0716 gene product                                                                                                                                                                                                                                                                                                                   | KIAA0716 |
| 220995_at                           | -1.2 |      | HSPC156 protein                                                                                                                                                                                                                                                                                                                         | HSPC156  |
| 215012_at                           | -1.2 |      | KIAA0576 protein                                                                                                                                                                                                                                                                                                                        | KIAA0576 |
| 212806_at                           | -1.3 |      | KIAA0367 protein                                                                                                                                                                                                                                                                                                                        | KIAA0367 |
| 214707_x_at                         | -1.3 |      | KIAA0328 protein                                                                                                                                                                                                                                                                                                                        | KIAA0328 |
| 220050_at                           | -1.5 |      | chromosome 9 open reading frame 9                                                                                                                                                                                                                                                                                                       | C9ORF9   |
| 212942_s_at                         | -1.6 |      | Homo sapiens mRNA for KIAA1199 protein, partial cds.                                                                                                                                                                                                                                                                                    | KIAA1199 |
| 206776_x_at                         | -1.5 |      | Homo sapiens acrosomal vesicle protein 1 (ACRV1), transcript variant 1, mRNA.                                                                                                                                                                                                                                                           | ACRV1    |
| 207969_x_at                         | -1.5 |      | Homo sapiens acrosomal vesicle protein 1 (ACRV1), transcript variant 5, mRNA.                                                                                                                                                                                                                                                           | ACRV1    |
| 207990_x_at                         | -1.1 |      | Homo sapiens acrosomal vesicle protein 1 (ACRV1), transcript variant 9, mRNA.                                                                                                                                                                                                                                                           | ACRV1    |
| 207991_x_at                         | -1.8 |      | acrosomal vesicle protein 1, isoform hprecursor                                                                                                                                                                                                                                                                                         | ACRV1    |
| 204529_s_at                         | -1.8 | -2.2 | KIAA0808 gene product                                                                                                                                                                                                                                                                                                                   | KIAA0808 |
| 212915_at                           | -2   | -2.6 | KIAA1095 protein                                                                                                                                                                                                                                                                                                                        | KIAA1095 |
| 212012_at                           | -2.1 | -1.9 | Melanoma associated gene                                                                                                                                                                                                                                                                                                                | D2S448   |
| 219179_at                           | -2.2 |      | heptacellular carcinoma novel gene-3                                                                                                                                                                                                                                                                                                    | LOC51339 |
| 208154_at                           | -2.8 |      | mesenchymal stem cell protein DSCD28                                                                                                                                                                                                                                                                                                    | LOC51336 |
| 214861_at                           | -3.1 | -1.5 | gene amplified in squamous cell carcinoma 1; KIAA0780 protein                                                                                                                                                                                                                                                                           | KIAA0780 |
| 203491_s_at                         |      | 1.2  | KIAA0092 gene product                                                                                                                                                                                                                                                                                                                   | KIAA0092 |
| 212373_at                           |      | 1.1  | FEM-1 (C.elegans) homolog b                                                                                                                                                                                                                                                                                                             | FEM1B    |
| 217722_s_at                         |      | 1.2  | mesenchymal stem cell protein DSC92                                                                                                                                                                                                                                                                                                     | LOC51335 |
| 221974_at                           |      | -1   | imprinted in Prader-Willi syndrome                                                                                                                                                                                                                                                                                                      | IPW      |
| 213447_at                           | -1   | -1   | imprinted in Prader-Willi syndrome                                                                                                                                                                                                                                                                                                      | IPW      |
| 207996_s_at                         |      | -3.3 | chromosome 18 open reading frame 1                                                                                                                                                                                                                                                                                                      | C18ORF1  |
| 212732_at                           |      | -1.7 | maternally expressed 3                                                                                                                                                                                                                                                                                                                  | MEG3     |
| 212190_at                           | -1.8 | -2.5 | trinucleotide repeat containing 3                                                                                                                                                                                                                                                                                                       | TNRC3    |
| 214774_x_at                         |      | -1.5 | trinucleotide repeat containing 9                                                                                                                                                                                                                                                                                                       | TNRC9    |
| 202416_at                           | 1    |      | tetratricopeptide repeat domain 2                                                                                                                                                                                                                                                                                                       | TTC2     |

|             |      |      |                                                                                                                                                                                                                                                                                                                                                                                                                                                                                                                                                                                                                                                                                                                                                                                                                                                                                                                                                            |             |
|-------------|------|------|------------------------------------------------------------------------------------------------------------------------------------------------------------------------------------------------------------------------------------------------------------------------------------------------------------------------------------------------------------------------------------------------------------------------------------------------------------------------------------------------------------------------------------------------------------------------------------------------------------------------------------------------------------------------------------------------------------------------------------------------------------------------------------------------------------------------------------------------------------------------------------------------------------------------------------------------------------|-------------|
| 208661_s_at |      | 1.2  | tetratricopeptide repeat domain 3                                                                                                                                                                                                                                                                                                                                                                                                                                                                                                                                                                                                                                                                                                                                                                                                                                                                                                                          | TTC3        |
| 208663_s_at |      | 2    | tetratricopeptide repeat domain 3                                                                                                                                                                                                                                                                                                                                                                                                                                                                                                                                                                                                                                                                                                                                                                                                                                                                                                                          | TTC3        |
| 208662_s_at | 1    | 1.4  | tetratricopeptide repeat domain 3                                                                                                                                                                                                                                                                                                                                                                                                                                                                                                                                                                                                                                                                                                                                                                                                                                                                                                                          | TTC3        |
| 213322_at   | 1    |      | Human DNA sequence from clone 34B21 on chromosome 6p12.1-21.1. Contains part of a gene for a novel protein with ZU5 domain similar to part of Tight Junction Protein ZO1 (TJP1) and UNC5 Homologs, the gene for a novel BZRP (peripheral benzodiazapine receptor (MBR,PBR, PBKS, IBP, Isoquinoline-binding protein)) LIKE protein, the gene for a novel protein similar to part of APOBEC1 (Phorbol 1, Apolipoprotein B mRNA editing protein), and the NFYA gene for nuclear transcription factor Y, alpha (CCAAT-Binding transcription factor subunit B, CBF-B, CAAT-Box DNA binding protein subunit A). Contains ESTs, STSs, GSSs, two putative CpG islands and a ca repeat polymorphism /DEF=Human DNA sequence from clone 34B21 on chromosome 6p12.1-21.1. Contains part of a gene for a novel protein with ZU5 domain similar to part of Tight Junction Protein ZO1 (TJP1) and UNC5 Homologs, the gene for a novel BZRP (peripheral benzodiazapine... |             |
| 205809_s_at |      | 3.3  | Wiskott-Aldrich syndrome-like                                                                                                                                                                                                                                                                                                                                                                                                                                                                                                                                                                                                                                                                                                                                                                                                                                                                                                                              | WASL        |
| 221123_x_at |      | 3.1  | Homo sapiens papillomavirus regulatory factor PRF-1 (LOC55893), mRNA.                                                                                                                                                                                                                                                                                                                                                                                                                                                                                                                                                                                                                                                                                                                                                                                                                                                                                      | LOC55893    |
| 216580_at   |      | 3    | Human DNA sequence from clone 263J7 on chromosome 6q14.3-15. Contains an RPL7 (60S Ribosomal Protein L7) pseudogene, a RAB1 (RAB1, member RAS oncogene family) pseudogene, ESTs, an STS and GSSs                                                                                                                                                                                                                                                                                                                                                                                                                                                                                                                                                                                                                                                                                                                                                           |             |
| 203203_s_at | 1.1  | 1.4  | HIV-1 rev binding protein 2                                                                                                                                                                                                                                                                                                                                                                                                                                                                                                                                                                                                                                                                                                                                                                                                                                                                                                                                | HRB2        |
| 221473_x_at |      | 1.1  | tumor differentially expressed 1                                                                                                                                                                                                                                                                                                                                                                                                                                                                                                                                                                                                                                                                                                                                                                                                                                                                                                                           | Diff33      |
| 202300_at   |      | 1.9  | hepatitis B virus x-interacting protein                                                                                                                                                                                                                                                                                                                                                                                                                                                                                                                                                                                                                                                                                                                                                                                                                                                                                                                    | XIP         |
| 206022_at   |      | -1.7 | Norrie disease protein                                                                                                                                                                                                                                                                                                                                                                                                                                                                                                                                                                                                                                                                                                                                                                                                                                                                                                                                     | NDP         |
| 212730_at   |      | -1.9 | KIAA0353 protein                                                                                                                                                                                                                                                                                                                                                                                                                                                                                                                                                                                                                                                                                                                                                                                                                                                                                                                                           | KIAA0353    |
| 203940_s_at |      | -2.7 | KIAA1036 protein                                                                                                                                                                                                                                                                                                                                                                                                                                                                                                                                                                                                                                                                                                                                                                                                                                                                                                                                           | KIAA1036    |
| 221052_at   |      | -1.2 | putative RNA binding protein                                                                                                                                                                                                                                                                                                                                                                                                                                                                                                                                                                                                                                                                                                                                                                                                                                                                                                                               | TDRKH       |
| 221053_s_at |      | -3.8 | putative RNA binding protein                                                                                                                                                                                                                                                                                                                                                                                                                                                                                                                                                                                                                                                                                                                                                                                                                                                                                                                               | TDRKH       |
| 204530_s_at |      | -2.8 | KIAA0808 gene product                                                                                                                                                                                                                                                                                                                                                                                                                                                                                                                                                                                                                                                                                                                                                                                                                                                                                                                                      | KIAA0808    |
| 215527_at   |      | -1.8 | Human DNA sequence from clone 240B8 on chromosome 6p11.2-q12. Contains the 3 part of a gene for a novel protein similar to T-STAR, Etoile, Sam68, SLM1 and p62 Tyrosine Phosphoprotein. Contains ESTs, STSs, GSSs and genomic marker D6S1695                                                                                                                                                                                                                                                                                                                                                                                                                                                                                                                                                                                                                                                                                                               |             |
| 218917_s_at |      | 1.2  | Homo sapiens uncharacterized bone marrow protein BM029 (BM029), mRNA.                                                                                                                                                                                                                                                                                                                                                                                                                                                                                                                                                                                                                                                                                                                                                                                                                                                                                      | BM029       |
| 219978_s_at |      | 1    | Homo sapiens uncharacterized bone marrow protein BM037 (BM037), mRNA.                                                                                                                                                                                                                                                                                                                                                                                                                                                                                                                                                                                                                                                                                                                                                                                                                                                                                      | BM037       |
| 219555_s_at | 1.8  | 3.5  | uncharacterized bone marrow protein BM039                                                                                                                                                                                                                                                                                                                                                                                                                                                                                                                                                                                                                                                                                                                                                                                                                                                                                                                  | BM039       |
| 202232_s_at |      | 2.5  | Homo sapiens dendritic cell protein (GA17), mRNA                                                                                                                                                                                                                                                                                                                                                                                                                                                                                                                                                                                                                                                                                                                                                                                                                                                                                                           | GA17        |
| 214711_at   | -2   |      | Human DNA sequence from BAC 15E1 on chromosome 12. Contains Cytochrome C Oxidase Polypeptide VIa-liver precursor gene, 60S ribosomal protein L31 pseudogene, pre-mRNA splicing factor SRp30c gene, two putative genes, ESTs, STSs and putative CpG islands                                                                                                                                                                                                                                                                                                                                                                                                                                                                                                                                                                                                                                                                                                 |             |
| 216358_at   | -1.7 |      | Human DNA sequence from clone RP3-526L9 on chromosome 6. Contains a SMARCE1 (SWISNF related, matrix associated, actin dependent regulator of chromatin, subfamily e, member 1) pseudogene, ESTs and GSSs                                                                                                                                                                                                                                                                                                                                                                                                                                                                                                                                                                                                                                                                                                                                                   |             |
| 215100_at   | -1.5 |      | Human DNA sequence from clone 413H6 on chromosome 6p22.3-24.3. Contains a hamster Androgen-dependent Expressed Protein like protein gene, ESTs and GSSs                                                                                                                                                                                                                                                                                                                                                                                                                                                                                                                                                                                                                                                                                                                                                                                                    |             |
| 215082_at   | -1.1 |      | Human DNA sequence from clone RP3-483K16 on chromosome 6p12.1-21.1. Contains (parts of) two novel genes, RPS16 (40S Ribosomal protein S16) and RPL31 (60S Ribosomal protein L31) pseudogenes, ESTs, STSs, GSSs and four putative CpG islands                                                                                                                                                                                                                                                                                                                                                                                                                                                                                                                                                                                                                                                                                                               |             |
| 217322_x_at | 1    |      | Human DNA sequence from clone 522P13 on chromosome 6p21.31-22.3. Contains a 60S Ribosomal Protein L21 pseudogene and an HNRNP A3 (Heterogenous Nuclear Riboprotein A3, FBRNP) pseudogene. Contains ESTs, STSs and GSSs                                                                                                                                                                                                                                                                                                                                                                                                                                                                                                                                                                                                                                                                                                                                     |             |
| 212144_at   | -1.3 |      | Human DNA sequence from clone RP3-508I15 on chromosome 22q12-13 Contains the gene for GTPBP1 (GTP binding protein 1), two novel genes KIAA0063 and KIAA0668, a novel gene based on ESTs and cDNA, a pseudogene similar to AOP1 (antioxidant protein 1)...                                                                                                                                                                                                                                                                                                                                                                                                                                                                                                                                                                                                                                                                                                  |             |
| 222023_at   | -4   |      | Homo sapiens cDNA FLJ11952 fis, clone HEMBB1000831, weakly similar to Homo sapiens breast cancer nuclear receptor-binding auxiliary protein (BRX) mRNA                                                                                                                                                                                                                                                                                                                                                                                                                                                                                                                                                                                                                                                                                                                                                                                                     |             |
| 216505_x_at | 1.7  |      | Human DNA sequence from clone RP11-371L19 on chromosome 20 Contains a novel gene, a gene similar to the gene for ribosomal protein S10, ESTs, STSs, GSSs and CpG islands                                                                                                                                                                                                                                                                                                                                                                                                                                                                                                                                                                                                                                                                                                                                                                                   |             |
| 200099_s_at | 1.5  |      | Human DNA sequence from clone RP11-486O22 on chromosome 10 Contains the 3part of a gene for KIAA1128 protein, a novel pseudogene, a gene for protein similar to RPS3A (ribosomal protein S3A), ESTs, STSs, GSSs and CpG islands                                                                                                                                                                                                                                                                                                                                                                                                                                                                                                                                                                                                                                                                                                                            |             |
| 213226_at   | 1.2  |      | polymyositis/scleroderma autoantigen 1 (75kD)                                                                                                                                                                                                                                                                                                                                                                                                                                                                                                                                                                                                                                                                                                                                                                                                                                                                                                              | PMSC11      |
| 211075_s_at | 1.1  | 1.8  | integrin associated protein                                                                                                                                                                                                                                                                                                                                                                                                                                                                                                                                                                                                                                                                                                                                                                                                                                                                                                                                |             |
| 208631_s_at | 1.1  |      | 78 kDa gastrin-binding protein                                                                                                                                                                                                                                                                                                                                                                                                                                                                                                                                                                                                                                                                                                                                                                                                                                                                                                                             | HADHA       |
| 213729_at   | 1    | 1.1  | Huntingtin-interacting protein A                                                                                                                                                                                                                                                                                                                                                                                                                                                                                                                                                                                                                                                                                                                                                                                                                                                                                                                           | HYP A       |
| 219910_at   | -1.3 |      | Huntingtin interacting protein E                                                                                                                                                                                                                                                                                                                                                                                                                                                                                                                                                                                                                                                                                                                                                                                                                                                                                                                           | HYPE        |
| 204994_at   | -1   |      | myxovirus (influenza) resistance 2, homolog of murine                                                                                                                                                                                                                                                                                                                                                                                                                                                                                                                                                                                                                                                                                                                                                                                                                                                                                                      | MX2         |
| 211460_at   | -1.1 |      | Homo sapiens testis transcript Y 9 (TTY9) mRNA, complete cds.                                                                                                                                                                                                                                                                                                                                                                                                                                                                                                                                                                                                                                                                                                                                                                                                                                                                                              | TTY9        |
| 211014_s_at | -1.2 |      | Homo sapiens tripartite motif protein TRIM19 kappa mRNA, complete cds.                                                                                                                                                                                                                                                                                                                                                                                                                                                                                                                                                                                                                                                                                                                                                                                                                                                                                     | PML         |
| 208360_s_at | -1.7 |      | endogenous retrovirus H D1 leaderregion/integrase-derived ORF1, ORF2, and putative envelopeprotein                                                                                                                                                                                                                                                                                                                                                                                                                                                                                                                                                                                                                                                                                                                                                                                                                                                         | HSU88895    |
| 209700_x_at | -2.1 |      | Homo sapiens mRNA, similar to rat myomegalin, complete cds.                                                                                                                                                                                                                                                                                                                                                                                                                                                                                                                                                                                                                                                                                                                                                                                                                                                                                                | LOC64182    |
| 34764_at    | -1   |      | Human mRNA for KIAA0028 gene, partial cds                                                                                                                                                                                                                                                                                                                                                                                                                                                                                                                                                                                                                                                                                                                                                                                                                                                                                                                  |             |
| 211276_at   | -1.3 | -2.4 | brain my048 protein                                                                                                                                                                                                                                                                                                                                                                                                                                                                                                                                                                                                                                                                                                                                                                                                                                                                                                                                        |             |
| 220770_s_at | 2.1  |      | Homo sapiens transposon-derived Buster3 transposase-like (LOC63920), mRNA.                                                                                                                                                                                                                                                                                                                                                                                                                                                                                                                                                                                                                                                                                                                                                                                                                                                                                 | LOC63920    |
| 218876_at   | 1.8  |      | brain specific protein                                                                                                                                                                                                                                                                                                                                                                                                                                                                                                                                                                                                                                                                                                                                                                                                                                                                                                                                     | LOC51673    |
| 209875_s_at | 1.7  |      | Human nephropontin mRNA, complete cds.                                                                                                                                                                                                                                                                                                                                                                                                                                                                                                                                                                                                                                                                                                                                                                                                                                                                                                                     |             |
| 217966_s_at | 1.7  |      | niban protein                                                                                                                                                                                                                                                                                                                                                                                                                                                                                                                                                                                                                                                                                                                                                                                                                                                                                                                                              | NIBAN       |
| 203345_s_at | 1.3  | 1.7  | putative DNA binding protein                                                                                                                                                                                                                                                                                                                                                                                                                                                                                                                                                                                                                                                                                                                                                                                                                                                                                                                               | M96         |
| 212018_s_at | 1.6  |      | Homo sapiens cDNA FLJ20815 fis, clone ADSE01038, highly similar to AJ007398 Homo sapiens mRNA for PBK1 protein.                                                                                                                                                                                                                                                                                                                                                                                                                                                                                                                                                                                                                                                                                                                                                                                                                                            | DKFP564M182 |
| 208778_s_at | 1.6  |      | t-complex 1                                                                                                                                                                                                                                                                                                                                                                                                                                                                                                                                                                                                                                                                                                                                                                                                                                                                                                                                                | TCP1        |
| 218320_s_at | 1.6  |      | similar to mouse neuronal protein 15.6                                                                                                                                                                                                                                                                                                                                                                                                                                                                                                                                                                                                                                                                                                                                                                                                                                                                                                                     | FLJ20494    |
| 211066_x_at | -1.2 |      | Homo sapiens, Similar to protocadherin gamma subfamily A, 5, clone MGC:13163, mRNA, complete cds.                                                                                                                                                                                                                                                                                                                                                                                                                                                                                                                                                                                                                                                                                                                                                                                                                                                          |             |
| 201165_s_at | 1    |      | pumilio (Drosophila) homolog 1                                                                                                                                                                                                                                                                                                                                                                                                                                                                                                                                                                                                                                                                                                                                                                                                                                                                                                                             | PUM1        |
| 216187_x_at | -1.6 |      | Homo sapiens Alu repeat (LNX1) mRNA sequence.                                                                                                                                                                                                                                                                                                                                                                                                                                                                                                                                                                                                                                                                                                                                                                                                                                                                                                              |             |
| 212496_s_at | -1.2 |      | KIAA0876 protein                                                                                                                                                                                                                                                                                                                                                                                                                                                                                                                                                                                                                                                                                                                                                                                                                                                                                                                                           | KIAA0876    |



|             |      |                                                                                                                                                                    |               |
|-------------|------|--------------------------------------------------------------------------------------------------------------------------------------------------------------------|---------------|
| 215184_at   | -1.2 | Homo sapiens cDNA: FLJ23148 fis, clone LNG09313, highly similar to AB018001 Homo sapiens mRNA for Death-associated protein kinase 2                                |               |
| 203713_s_at | -1.2 | lethal giant larvae (Drosophila) homolog 2                                                                                                                         | LLGL2         |
| 213796_at   | -1.7 | Small proline-rich protein SPRK (human, odontogenic keratocysts, mRNA Partial, 317 nt)                                                                             |               |
| 216249_at   | -1.7 | Human transcription unit PVT gene, exons I-III.                                                                                                                    |               |
| 205064_at   | -1.5 | small proline-rich protein 1B (cornifin)                                                                                                                           | SPRR1B        |
| 217902_s_at | -1.1 | hect domain and RLD 2                                                                                                                                              | HERC2         |
| 221221_s_at | -1.1 | kelch (Drosophila)-like 3                                                                                                                                          | KLHL3         |
| 203255_at   | -1.2 | vitiligo-associated protein VIT-1                                                                                                                                  | VIT1          |
| 202170_s_at | 1.2  | Homo sapiens HSPC223 mRNA, complete cds.                                                                                                                           | AASDHPPT      |
| 203428_s_at | 1.2  | Homo sapiens mRNA for CIA, complete cds.                                                                                                                           | DKFZP547E2110 |
| 212028_at   | 1.4  | S164 protein                                                                                                                                                       | S164          |
| 214235_at   | -1.1 | H.sapiens DNA for cyp related pseudogene.                                                                                                                          |               |
| 208238_x_at | -1.2 | leucine zipper-like protein                                                                                                                                        | LZLP          |
| 213169_at   | -1.3 | Homo sapiens clone TUA8 Cri-du-chat region mRNA                                                                                                                    |               |
| 209997_x_at | -1.2 | Similar to pericentriolar material 1                                                                                                                               |               |
| 215810_x_at | -1.1 | Dystonia musculorum of mouse, human homolog of                                                                                                                     | D6S1101       |
| 218049_s_at | 1.5  | L13 protein                                                                                                                                                        | L13           |
| 217457_s_at | 1    | smg GDS                                                                                                                                                            | hGDS          |
| 218970_s_at | 1    | CGI-32 protein                                                                                                                                                     | LOC51076      |
| 220755_s_at | 1.1  | G8 protein                                                                                                                                                         | G8            |
| 205525_at   | -1.1 | NAG22 protein                                                                                                                                                      | LOC55873      |
| 215985_at   | -1.1 | HCGVIII-1 protein                                                                                                                                                  | HCGVIII-1     |
| 40020_at    | -1.1 | Homo sapiens mRNA for MEGF2, partial cds                                                                                                                           |               |
| 220158_at   | -1.1 | placental protein 13-like protein                                                                                                                                  | LOC56891      |
| 215817_at   | -1.2 | UV-B repressed sequence, HUR 7                                                                                                                                     | HSR7SEQ       |
| 209737_at   | -1.2 | KIAA0705 protein                                                                                                                                                   | KIAA0705      |
| 212679_at   | -1.2 | transducin (beta)-like 2                                                                                                                                           | TBL2          |
| 210873_x_at | -1.2 | phorbol I                                                                                                                                                          | DJ742C19.2    |
| 203854_at   | -1.3 | I factor (complement)                                                                                                                                              | IF            |
| 206767_at   | -1.3 | RNA binding motif, single stranded interacting protein 3                                                                                                           | RBMS3         |
| 216931_at   | -1.3 | Homo sapiens (clone Z146) retinal mRNA, 3 end and repeat region.                                                                                                   |               |
| 214409_at   | -1.3 | ret finger protein-like 3 antisense                                                                                                                                | RFPL3S        |
| 222106_at   | -1.3 | prion gene complex, downstream                                                                                                                                     | PRND          |
| 201645_at   | -1.3 | hexabrachion (tenascin C, cytotoxin)                                                                                                                               | HXB           |
| 220951_s_at | -1.3 | Apobec-1 complementation factor; APOBEC-1stimulating protein                                                                                                       | ACF           |
| 222187_x_at | -1.3 | H.sapiens mRNA for TRE5.                                                                                                                                           |               |
| 213332_at   | -1.3 | similar to pregnancy-associated plasma protein A precursor                                                                                                         | LOC57036      |
| 201981_at   | -2.1 | pregnancy-associated plasma protein A                                                                                                                              | PAPPA         |
| 211071_s_at | -1.3 | ALL1-fused gene from chromosome 1q                                                                                                                                 |               |
| 215011_at   | -1.3 | Homo sapiens RNA transcript from U17 small nucleolar RNA host gene, variant U17HG-AB.                                                                              | RNU17D        |
| 37022_at    | -1.4 | Human prolargin (PRELP) gene, 5 flanking sequence and                                                                                                              |               |
| 209584_x_at | -1.4 | phorbol I protein                                                                                                                                                  | PBI           |
| 210943_s_at | -1.4 | Chediak-Higashi syndrome protein short isoform                                                                                                                     | LYST          |
| 214772_at   | -1.5 | G2 protein                                                                                                                                                         | G2            |
| 220792_at   | -1.5 | PR domain containing 5                                                                                                                                             | PRDM5         |
| 219746_at   | -1.5 | cer-d4 (mouse) homolog                                                                                                                                             | CERD4         |
| 205328_at   | -1.5 | claudin 10                                                                                                                                                         | CLDN10        |
| 211751_at   | -1.6 | similar to rat myomegalin                                                                                                                                          |               |
| 211055_s_at | -1.7 | Similar to inversin                                                                                                                                                |               |
| 205636_at   | -1.9 | Homo sapiens EEN-B2-L1 mRNA, complete cds.                                                                                                                         | EEN-B2-L1     |
| 217020_at   | -1.9 | Homo sapiens DNA for HBV integration sites                                                                                                                         |               |
| 221492_s_at | 1.3  | PC3-96                                                                                                                                                             | PC3-96        |
| 219372_at   | 1.3  | CDV-1 protein                                                                                                                                                      | CDV-1         |
| 203893_at   | 1.3  | adrenal gland protein AD-004                                                                                                                                       |               |
| 208029_s_at | 1.4  | putative integral membrane transporter                                                                                                                             | LC27          |
| 211000_s_at | 1.4  | gp130 of the rheumatoid arthritis antigenic peptide-bearing soluble form (gp130-RAPS)                                                                              | gp130         |
| 209219_at   | 1.2  | RD protein                                                                                                                                                         | RD            |
| 212208_at   | 1.2  | Homo sapiens cDNA FLJ13775 fis, clone PLACE4000369, moderately similar to Homo sapiens thyroid hormone receptor-associated protein complex component TRAP240 mRNA. | KIAA1025      |
| 204409_s_at | 1.1  | Homo sapiens, clone MGC:12282, mRNA, complete cds.                                                                                                                 | EIF1AY        |
| 219843_at   | 1.1  | intracisternal A particle-promoted polypeptide                                                                                                                     | IPP           |
| 202124_s_at | 1.1  | amyotrophic lateral sclerosis 2 (juvenile) chromosome region, candidate 3                                                                                          | ALS2CR3       |
| 221702_s_at | 1    | BBP-like protein 2                                                                                                                                                 | BLP2          |
| 209254_at   | 1    | KIAA0265 protein                                                                                                                                                   | KIAA0265      |
| 200616_s_at | 1    | KIAA0152 gene product                                                                                                                                              | KIAA0152      |
| 36612_at    | -1   | Human mRNA for KIAA0280 gene, partial cds                                                                                                                          |               |
| 205428_s_at | -1   | calbindin 2, full length protein isoform                                                                                                                           | CALB2         |
| 206734_at   | -1.1 | jerky (mouse) homolog-like                                                                                                                                         | JRKL          |
| 213900_at   | -1.1 | Friedreich ataxia region gene X123                                                                                                                                 | X123          |
| 220237_at   | -1.2 | PC3-96 protein                                                                                                                                                     | PC3-96        |
| 217128_s_at | -1.3 | Human gene isolated from PAC 272L16, chromosome 1, similar to calciumcalmodulin dependent protein kinases.                                                         | DJ272L16.1    |
| 209405_s_at | -1.3 | Similar to predicted osteoblast protein                                                                                                                            | 2.19          |
| 209568_s_at | -1.3 | RGL protein                                                                                                                                                        | RGL           |
| 211403_x_at | -1.3 | variably charged X-B                                                                                                                                               | VCXB          |
| 220974_x_at | -1.3 | similar to rat tricarbonylate carrier-like protein                                                                                                                 | BA108L7.2     |
| 211602_s_at | -1.4 | Human alternatively spliced trp-1 protein and unspliced trp-1 protein (trp-1) mRNA, complete cds.                                                                  | TRP-1         |
| 205413_at   | -1.4 | chromosome 11 open reading frame 8                                                                                                                                 | C11ORF8       |
| 210227_at   | -1.7 | discs, large (Drosophila) homolog-associated protein 2                                                                                                             | DLGAP2        |
| 40446_at    | -1.8 | Cluster Incl. AL021366:cICK0721Q.4.1 (PHD finger protein 2) (isoform 2)                                                                                            |               |
| 212739_s_at | -1.8 | non-metastatic cells 4, protein expressed in                                                                                                                       | NME4          |
| 212013_at   | -1.9 | Melanoma associated gene                                                                                                                                           | KIAA0230      |
| 217130_at   | -2.4 | HFSE-1                                                                                                                                                             | HFSE-1        |
| 210409_at   | -3.1 | myeloidlymphoid or mixed-lineage leukemia (trithorax (Drosophila) homolog); translocated to, 4                                                                     | HGC6.4        |
| 210667_s_at | -4.2 | KNP-Ib                                                                                                                                                             | KNP-I         |
| 210117_at   | 1.1  | Homo sapiens infertility-related sperm protein mRNA, complete cds.                                                                                                 | SPAG1         |

|             |      |                                                                                |                |
|-------------|------|--------------------------------------------------------------------------------|----------------|
| 222358_x_at | -1.1 | ESTs, Weakly similar to ALU1_HUMAN ALU SUBFAMILY J                             |                |
| 217703_x_at | -1.2 | ESTs, Moderately similar to ALU7_HUMAN ALU SUBFAMILY                           |                |
| 217687_at   | -1.2 | ESTs, Weakly similar to CYA7_HUMAN ADENYLATE CYCLASE, TYPE VII                 |                |
| 222301_at   | -1.2 | ESTs, Highly similar to transcriptional activator                              |                |
| 217713_x_at | -1.3 | ESTs, Weakly similar to ALU6_HUMAN ALU SUBFAMILY SP                            |                |
| 222377_at   | -1.3 | ESTs, Highly similar to T-box-containing transcriptional activator             |                |
| 217679_x_at | -1.4 | ESTs, Moderately similar to ALU8_HUMAN ALU SUBFAMILY SX                        |                |
| 217534_at   | -1.7 | ESTs, Weakly similar to ALU7_HUMAN ALU SUBFAMILY SQ                            |                |
| 217586_x_at | -1.7 | ESTs, Weakly similar to ALU1_HUMAN ALU SUBFAMILY J                             |                |
| 217579_x_at | -1.7 | ESTs, Weakly similar to ALU1_HUMAN ALU SUBFAMILY J                             |                |
| 216874_at   | -1.7 | Human EST clone 251800 mariner transposon Hsmar1 sequence                      |                |
| 221734_at   | 3.6  | ESTs, Weakly similar to A43932 mucin 2 precursor, intestinal                   |                |
| 217602_at   | 2.7  | ESTs                                                                           |                |
| 217550_at   | 1.9  | ESTs                                                                           |                |
| 221883_at   | 1.1  | ESTs                                                                           |                |
| 221765_at   | 1    | ESTs                                                                           |                |
| 221961_at   | -1   | ESTs                                                                           |                |
| 222369_at   | -1   | ESTs                                                                           |                |
| 217714_x_at | -1.1 | ESTs                                                                           |                |
| 222326_at   | -1.1 | ESTs                                                                           |                |
| 222275_at   | -1.2 | ESTs                                                                           |                |
| 222273_at   | -1.2 | ESTs                                                                           |                |
| 222280_at   | -1.2 | ESTs, Weakly similar to ALUC_HUMAN                                             |                |
| 222361_at   | -1.4 | ESTs, Moderately similar to TBB2_HUMAN TUBULIN BETA-2 CHAIN                    |                |
| 204825_at   | 2    | KIAA0175 gene product                                                          | KIAA0175       |
| 218039_at   | 1.5  | clone HQ0310 PRO0310p1                                                         | LOC51203       |
| 220030_at   | 4.2  | hypothetical protein DKFZp761P1010                                             | DKFZp761P1010  |
| 218890_x_at | 2.4  | hypothetical protein (LOC51318)                                                | LOC51318       |
| 218751_s_at | 2.3  | hypothetical protein FLJ11071                                                  | FLJ11071       |
| 218542_at   | 2    | hypothetical protein FLJ10540 (FLJ10540)                                       | FLJ10540       |
| 209683_at   | 1.6  | hypothetical protein DKFZp566A1524                                             | DKFZp566A1524  |
| 220199_s_at | 1.5  | hypothetical protein FLJ12806 (FLJ12806)                                       | FLJ12806       |
| 219918_s_at | 1.4  | hypothetical protein FLJ10517 (FLJ10517)                                       | FLJ10517       |
| 218123_at   | 1.4  | chromosome 21 open reading frame 59 (C21ORF59)                                 | C21ORF59       |
| 219002_at   | 1.4  | hypothetical protein FLJ21901 (FLJ21901)                                       | FLJ21901       |
| 222151_s_at | 1.3  | hypothetical protein FLJ13386                                                  | FLJ13386       |
| 219493_at   | 1.3  | hypothetical protein FLJ22009 (FLJ22009)                                       | FLJ22009       |
| 221771_s_at | 1.3  | Unknown (protein for IMAGE:3611719)                                            |                |
| 209479_at   | 1.3  | Homo sapiens, clone MGC:2698, mRNA, complete cds.                              | DKFZP586D0623  |
| 206316_s_at | 1.3  | KIAA0166 gene product                                                          | KIAA0166       |
| 206364_at   | 1.3  | KIAA0042 gene product                                                          | KIAA0042       |
| 206860_s_at | 1.3  | hypothetical protein (FLJ20323)                                                | FLJ20323       |
| 219990_at   | 1.3  | hypothetical protein FLJ23311 (FLJ23311)                                       | FLJ23311       |
| 213718_at   | 1.2  | Homo sapiens, clone MGC:10871, mRNA, complete cds                              |                |
| 219588_s_at | 1.2  | hypothetical protein FLJ20311 (FLJ20311)                                       | FLJ20311       |
| 208868_s_at | 1.2  | Homo sapiens mRNA; cDNA DKFZp564N1272 (from clone DKFZp564N1272); complete cds |                |
| 220477_s_at | 1.1  | HSPC274 protein                                                                | HSPC274        |
| 212738_at   | 1.1  | Human clone 23719 mRNA sequence                                                |                |
| 221452_s_at | 1.1  | hypothetical protein MGC1223 (MGC1223)                                         | MGC1223        |
| 220329_s_at | 1.1  | hypothetical protein FLJ20627 (FLJ20627)                                       | FLJ20627       |
| 219054_at   | 1.1  | hypothetical protein FLJ14054 (FLJ14054)                                       | FLJ14054       |
| 214876_s_at | 1.1  | cDNA FLJ13872 fis, clone THYRO1001322                                          |                |
| 218883_s_at | 1.1  | hypothetical protein FLJ23468 (FLJ23468)                                       | FLJ23468       |
| 219355_at   | 1.1  | hypothetical protein FLJ10178 (FLJ10178)                                       | FLJ10178       |
| 218349_s_at | 1.1  | hypothetical protein FLJ10036 (FLJ10036)                                       | FLJ10036       |
| 211505_s_at | 1.1  | mRNA; cDNA DKFZp564J1516 (from clone DKFZp564J1516); complete cds              | DKFZp564J1516  |
| 213092_x_at | 1.1  | KIAA0974 protein                                                               | KIAA0974       |
| 209092_s_at | 1.1  | Homo sapiens clone 016b03 My027 protein mRNA, complete cds.                    | LOC51031       |
| 213379_at   | 1.1  | Homo sapiens clone 640 unknown mRNA, complete sequence.                        | CL640          |
| 219004_s_at | 1.1  | chromosome 21 open reading frame 45                                            | C21ORF45       |
| 217919_s_at | 1    | PTD007 protein                                                                 | PTD007         |
| 202887_s_at | 1    | hypothetical protein (FLJ20500)                                                | FLJ20500       |
| 219122_s_at | 1    | hypothetical protein FLJ20546 (FLJ20546)                                       | FLJ20546       |
| 220060_s_at | 1    | hypothetical protein FLJ20641 (FLJ20641)                                       | FLJ20641       |
| 219787_s_at | 1    | hypothetical protein FLJ10461 (FLJ10461)                                       | FLJ10461       |
| 221986_s_at | 1    | hypothetical protein FLJ20059                                                  | FLJ20059       |
| 218622_at   | 1    | hypothetical protein MGC5585 (MGC5585)                                         | MGC5585        |
| 219979_s_at | 1    | hypothetical protein (HSPC138)                                                 | HSPC138        |
| 218852_at   | 1    | hypothetical protein FLJ20644 (FLJ20644)                                       | FLJ20644       |
| 218558_s_at | 1    | hypothetical protein                                                           | PRED22         |
| 218859_s_at | 1    | HDCMC28P protein                                                               | HDCMC28P       |
| 221766_s_at | 1    | hypothetical protein FLJ20037                                                  | FLJ20037       |
| 33768_at    | -1   | Homo sapiens 59 protein mRNA, 3' end                                           |                |
| 209766_at   | -1   | Homo sapiens PRO1748 mRNA, complete cds.                                       | PRO1748        |
| 213109_at   | -1   | KIAA0551 protein                                                               | KIAA0551       |
| 214902_x_at | -1   | mRNA; cDNA DKFZp586A061 (from clone DKFZp586A061)                              |                |
| 216678_at   | -1   | cDNA FLJ20766 fis, clone COL07978                                              |                |
| 220596_at   | -1   | DKFZP434F1735 protein (DKFZP434F1735), mRNA                                    | DKFZP434F1735  |
| 220725_x_at | -1   | hypothetical protein FLJ23558 (FLJ23558)                                       | FLJ23558       |
| 215387_x_at | -1   | cDNA FLJ11443 fis, clone HEMBA1001330                                          |                |
| 216682_s_at | -1   | cDNA FLJ11395 fis, clone HEMBA1000594                                          |                |
| 221030_s_at | -1   | hypothetical protein DKFZp564B1162 (DKFZP564B1162)                             | DKFZP564B1162  |
| 59437_at    | -1   | IMAGE-2406340                                                                  |                |
| 221629_x_at | -1   | HSPC188 mRNA, complete cds                                                     | LOC51236       |
| 219981_x_at | -1   | hypothetical protein FLJ20813 (FLJ20813)                                       | FLJ20813       |
| 213486_at   | -1   | hypothetical protein DKFZp761N09121                                            | DKFZP761N09121 |
| 81811_at    | -1   | IMAGE-2362767                                                                  |                |
| 213686_at   | -1   | clone 24583 mRNA sequence                                                      |                |

|             |      |                                                            |                |
|-------------|------|------------------------------------------------------------|----------------|
| 219706_at   | -1   | hypothetical protein FLJ11168 (FLJ11168)                   | FLJ11168       |
| 206548_at   | -1   | hypothetical protein FLJ23556 (FLJ23556)                   | FLJ23556       |
| 222108_at   | -1   | -1.4 Human BAC clone GS1-99H8                              |                |
| 44696_at    | -1   | IMAGE-1473925                                              |                |
| 219757_s_at | -1   | hypothetical protein FLJ20392 (FLJ20392)                   | FLJ20392       |
| 212419_at   | -1   | -2 mRNA; cDNA DKFZp564L0822 (from clone DKFZp564L0822)     |                |
| 219732_at   | -1   | -1.4 hypothetical protein FLJ20300 (FLJ20300)              | FLJ20300       |
| 215128_at   | -1   | cDNA FLJ11682 fis, clone HEMBA1004880                      |                |
| 214722_at   | -1   | cDNA FLJ11946 fis, clone HEMBB1000709                      |                |
| 221038_at   | -1   | hypothetical protein PRO1942 (PRO1942)                     | PRO1942        |
| 44702_at    | -1   | -1.3 IMAGE-144061                                          |                |
| 210723_x_at | -1   | clone MGC:4771                                             |                |
| 201775_s_at | -1   | KIAA0494 gene product                                      | KIAA0494       |
| 214785_at   | -1   | Homo sapiens mRNA for KIAA0986 protein, partial cds.       | KIAA0986       |
| 204308_s_at | -1   | KIAA0329 gene product                                      | KIAA0329       |
| 212976_at   | -1   | KIAA0231 protein                                           | KIAA0231       |
| 202972_s_at | -1   | KIAA0914 gene product                                      | KIAA0914       |
| 215848_at   | -1   | KIAA1454 protein                                           | KIAA1454       |
| 213056_at   | -1   | KIAA1013 protein                                           | KIAA1013       |
| 49329_at    | -1   | IMAGE-273900                                               |                |
| 41553_at    | -1   | IMAGE-2390973                                              |                |
| 206818_s_at | -1   | hypothetical protein FLJ20064 (FLJ20064)                   | FLJ20064       |
| 216739_at   | -1   | cDNA: FLJ20874 fis, clone ADKA02818                        |                |
| 220227_at   | -1   | hypothetical protein FLJ22202 (FLJ22202)                   | FLJ22202       |
| 220578_at   | -1   | hypothetical protein FLJ13544 (FLJ13544)                   | FLJ13544       |
| 59705_at    | -1   | IMAGE-1476617                                              |                |
| 217629_at   | -1.1 | ESTs                                                       |                |
| 211406_at   | -1.1 | PRO2309                                                    | HSPC039        |
| 211445_x_at | -1.1 | FKSG17                                                     | FKSG17         |
| 215109_at   | -1.1 | KIAA0492 protein                                           | KIAA0492       |
| 213922_at   | -1.1 | KIAA0847 protein                                           | KIAA0847       |
| 201815_s_at | -1.1 | KIAA0210 gene product                                      | KIAA0210       |
| 209048_s_at | -1.1 | KIAA1125 protein                                           | KIAA1125       |
| 218155_x_at | -1.1 | hypothetical protein FLJ10534                              | FLJ10534       |
| 220897_at   | -1.1 | -1.5 hypothetical protein FLJ11556 (FLJ11556)              | FLJ11556       |
| 220796_x_at | -1.1 | hypothetical protein FLJ14251 (FLJ14251)                   | FLJ14251       |
| 220071_x_at | -1.1 | hypothetical protein FLJ10460 (FLJ10460)                   | FLJ10460       |
| 215521_at   | -1.1 | hypothetical protein FLJ12729                              | FLJ12729       |
| 214053_at   | -1.1 | clone 23736 mRNA sequence                                  |                |
| 219951_s_at | -1.1 | -1.2 hypothetical protein FLJ10600 (FLJ10600)              | FLJ10600       |
| 219156_at   | -1.1 | hypothetical protein FLJ11271 (FLJ11271)                   | FLJ11271       |
| 215557_at   | -1.1 | cDNA FLJ10146 fis, clone HEMBA1003327                      |                |
| 49878_at    | -1.1 | IMAGE-936303                                               |                |
| 209656_s_at | -1.1 | -2.4 mRNA; cDNA DKFZp761J17121 (from clone DKFZp761J17121) | DKFZp761J17121 |
| 215032_at   | -1.1 | cDNA FLJ12380 fis, clone MAMMA1002556                      |                |
| 214862_x_at | -1.1 | mRNA; cDNA DKFZp564G1162 (from clone DKFZp564G1162)        |                |
| 39891_at    | -1.1 | -1 IMAGE-1871401                                           |                |
| 220826_at   | -1.1 | hypothetical protein FLJ10932 (FLJ10932)                   | FLJ10932       |
| 216153_x_at | -1.1 | cDNA FLJ12835 fis, clone NT2RP2003165                      |                |
| 217991_x_at | -1.1 | hypothetical protein FLJ10355 (FLJ10355)                   | FLJ10355       |
| 217197_x_at | -1.1 | Novel human gene mapping to chromosome 13                  |                |
| 44563_at    | -1.1 | IMAGE-2408049                                              |                |
| 219194_at   | -1.2 | KIAA1619 protein                                           | KIAA1619       |
| 207436_x_at | -1.2 | KIAA0894 protein                                           | KIAA0894       |
| 220672_at   | -1.2 | hypothetical protein MGC4163                               | KIAA1622       |
| 213605_s_at | -1.2 | mRNA; cDNA DKFZp564F112 (from clone DKFZp564F112)          |                |
| 206557_at   | -1.2 | hypothetical protein FLJ12985 (FLJ12985)                   | FLJ12985       |
| 220215_at   | -1.2 | hypothetical protein FLJ12606 (FLJ12606)                   | FLJ12606       |
| 208849_at   | -1.2 | PRO2047                                                    | PRO2047        |
| 215208_x_at | -1.2 | cDNA FLJ11509 fis, clone HEMBA1002166                      |                |
| 222370_x_at | -1.2 | IMAGE:246776                                               |                |
| 211422_at   | -1.2 | cDNA DKFZp761A19121 (from clone DKFZp761A19121)            |                |
| 215898_at   | -1.2 | cDNA FLJ11817 fis, clone HEMBA1006421                      |                |
| 222079_at   | -1.2 | IMAGE:3576732                                              |                |
| 218814_s_at | -1.2 | hypothetical protein FLJ10874 (FLJ10874)                   | FLJ10874       |
| 215445_x_at | -1.2 | clone 23605 mRNA sequence                                  |                |
| 216466_at   | -1.2 | mRNA; cDNA DKFZp566D153 (from clone DKFZp566D153)          |                |
| 215404_x_at | -1.2 | cDNA FLJ14326 fis, clone PLACE4000247                      |                |
| 220352_x_at | -1.2 | hypothetical protein MGC4278 (MGC4278)                     | MGC4278        |
| 215397_x_at | -1.2 | cDNA FLJ12379 fis, clone MAMMA1002554                      |                |
| 58780_s_at  | -1.2 | -1.6 IMAGE-30831                                           |                |
| 215200_x_at | -1.2 | cDNA FLJ12300 fis, clone MAMMA1001854                      |                |
| 221104_s_at | -1.2 | hypothetical protein FLJ11275 (FLJ11275)                   | FLJ11275       |
| 216159_s_at | -1.2 | cDNA FLJ13695 fis, clone PLACE2000124                      |                |
| 220823_at   | -1.2 | hypothetical protein FLJ20019 (FLJ20019)                   | FLJ20019       |
| 216121_at   | -1.2 | mRNA; cDNA DKFZp566O053 (from clone DKFZp566O053)          |                |
| 63305_at    | -1.2 | GEN-408A08                                                 |                |
| 218175_at   | -1.2 | hypothetical protein FLJ22471 (FLJ22471)                   | FLJ22471       |
| 220242_x_at | -1.2 | hypothetical protein FLJ10891 (FLJ10891)                   | FLJ10891       |
| 214762_at   | -1.2 | Homo sapiens DNA, cosmid clones TN62 and TN82              |                |
| 217643_x_at | -1.2 | IMAGE:784743                                               |                |
| 215321_at   | -1.2 | BAC clone CTB-60N22 from 7q21                              |                |
| 207728_at   | -1.2 | hypothetical protein FLJ10139 (FLJ10139)                   | FLJ10139       |
| 220873_at   | -1.2 | hypothetical protein PRO0386 (PRO0386)                     | PRO0386        |
| 203640_at   | -1.2 | hypothetical protein PRO2032                               | PRO2032        |
| 215528_at   | -1.2 | mRNA; cDNA DKFZp586O1318 (from clone DKFZp586O1318)        |                |
| 208015_at   | -1.2 | DKFZP586M0622 protein (DKFZP586M0622)                      | DKFZP586M0622  |
| 203546_at   | -1.2 | KIAA0724 gene product                                      | KIAA0724       |
| 216374_at   | -1.2 | BAC clone RP11-155J5 from Y                                |                |

|             |      |      |                                                                                                                     |               |
|-------------|------|------|---------------------------------------------------------------------------------------------------------------------|---------------|
| 215183_at   | -1.2 |      | clone HQ0072.                                                                                                       |               |
| 221910_at   | -1.2 |      | clone 24421 mRNA sequence                                                                                           |               |
| 220082_at   | -1.2 |      | hypothetical protein FLJ20251 (FLJ20251)                                                                            | FLJ20251      |
| 216310_at   | -1.2 |      | KIAA1361 protein                                                                                                    | KIAA1361      |
| 218554_s_at | -1.2 |      | hypothetical protein ASH1                                                                                           | ASH1          |
| 211364_at   | -1.2 |      | Homo sapiens hypothetical methylthioadenosine phosphorylase fusion protein mRNA, complete cds.                      |               |
| 214923_at   | -1.2 |      | Homo sapiens cDNA FLJ10293 fis, clone NT2RM1000280, highly similar to VACUOLAR ATP SYNTHASE SUBUNIT D (EC 3.6.1.34) |               |
| 220853_at   | -1.2 |      | PRO0159 protein                                                                                                     | PRO0159       |
| 215754_at   | -1.3 |      | Homo sapiens cDNA FLJ12370 fis, clone MAMMA1002428, weakly similar to LYSOSOME MEMBRANE PROTEIN II                  |               |
| 215175_at   | -1.3 |      | KIAA0995 protein                                                                                                    | KIAA0995      |
| 215750_at   | -1.3 |      | KIAA1659 protein                                                                                                    | KIAA1659      |
| 215999_at   | -1.3 |      | chromosome 17 open reading frame 1A                                                                                 | C17ORF1A      |
| 209829_at   | -1.3 |      | chromosome 6 open reading frame 32                                                                                  | KIAA0386      |
| 216863_s_at | -1.3 |      | KIAA0852 protein                                                                                                    | KIAA0852      |
| 205862_at   | -1.3 |      | KIAA0575 gene product                                                                                               | KIAA0575      |
| 210718_s_at | -1.3 |      | Homo sapiens PRO2667 mRNA, complete cds.                                                                            |               |
| 215383_x_at | -1.3 |      | mRNA; cDNA DKFZp761K23121 (from clone DKFZp761K23121)                                                               |               |
| 209841_s_at | -1.3 |      | mRNA; cDNA DKFZp761K2424 (from clone DKFZp761K2424)                                                                 |               |
| 217446_x_at | -1.3 |      | mRNA; cDNA DKFZp434M054 (from clone DKFZp434M054)                                                                   |               |
| 213158_at   | -1.3 |      | mRNA; cDNA DKFZp586B211 (from clone DKFZp586B211)                                                                   |               |
| 220533_at   | -1.3 | -1.4 | hypothetical protein FLJ13385 (FLJ13385)                                                                            | FLJ13385      |
| 219450_at   | -1.3 |      | hypothetical protein FLJ11017 (FLJ11017)                                                                            | FLJ11017      |
| 217540_at   | -1.3 |      | ESTs                                                                                                                |               |
| 215587_x_at | -1.3 |      | DNA FLJ13829 fis, clone THYRO1000625                                                                                |               |
| 216662_at   | -1.3 |      | cDNA FLJ20138 fis, clone COL07172                                                                                   |               |
| 215006_at   | -1.3 |      | cDNA FLJ13754 fis, clone PLACE3000362                                                                               |               |
| 220221_at   | -1.3 |      | hypothetical protein FLJ10619 (FLJ10619)                                                                            | FLJ10619      |
| 222271_at   | -1.3 |      | ESTs                                                                                                                |               |
| 213106_at   | -1.3 | -1.5 | clone 23664 and 23905 mRNA sequence                                                                                 |               |
| 215608_at   | -1.3 |      | Homo sapiens cDNA FLJ11475 fis, clone HEMBA1001734, moderately similar to CADHERIN-11 PRECURSOR                     |               |
| 216176_at   | -1.3 |      | cDNA: FLJ21690 fis, clone COL09538                                                                                  |               |
| 221916_at   | -1.3 | -2   | hypothetical protein                                                                                                | DKFZp434B0417 |
| 215126_at   | -1.3 |      | mRNA full length insert cDNA clone EUROIMAGE 208948                                                                 |               |
| 222207_x_at | -1.3 |      | cDNA: FLJ20949 fis, clone ADSE01902                                                                                 |               |
| 51226_at    | -1.3 |      | IMAGE-284209                                                                                                        |               |
| 215600_x_at | -1.3 |      | cDNA FLJ12112 fis, clone MAMMA1000043                                                                               |               |
| 220439_at   | -1.3 |      | hypothetical protein FLJ11700 (FLJ11700)                                                                            | FLJ11700      |
| 215612_at   | -1.3 |      | cDNA FLJ12349 fis, clone MAMMA1002308                                                                               |               |
| 222366_at   | -1.3 |      | ESTs                                                                                                                |               |
| 215978_x_at | -1.3 |      | cDNA FLJ11452 fis, clone HEMBA1001435                                                                               |               |
| 216081_at   | -1.3 |      | cDNA: FLJ23498 fis, clone LNG02683                                                                                  |               |
| 217616_at   | -1.3 |      | ESTs                                                                                                                |               |
| 207730_x_at | -1.3 |      | hypothetical protein FLJ20700 (FLJ20700)                                                                            | FLJ20700      |
| 32540_at    | -1.3 |      | IMAGE-2388224                                                                                                       |               |
| 217715_x_at | -1.3 |      | ESTs                                                                                                                |               |
| 215553_x_at | -1.3 |      | cDNA FLJ14253 fis, clone OVARC1001376                                                                               |               |
| 216703_at   | -1.3 |      | mRNA; cDNA DKFZp434N199 (from clone DKFZp434N199)                                                                   |               |
| 220717_at   | -1.3 |      | hypothetical protein FLJ13166 (FLJ13166)                                                                            | FLJ13166      |
| 209435_s_at | -1.3 | -1   | clone MGC:3182                                                                                                      |               |
| 217662_x_at | -1.3 |      | ESTs                                                                                                                |               |
| 215854_at   | -1.3 |      | cDNA FLJ11844 fis, clone HEMBA1006665                                                                               |               |
| 220186_s_at | -1.3 |      | hypothetical protein FLJ20124 (FLJ20124)                                                                            | FLJ20124      |
| 221159_at   | -1.3 |      | clone FLB1727 (LOC51215)                                                                                            | LOC51215      |
| 221214_s_at | -1.3 |      | DKFZP586J1624 protein (DKFZP586J1624)                                                                               | DKFZP586J1624 |
| 214989_x_at | -1.3 |      | clone IMAGE:3446800                                                                                                 |               |
| 214081_at   | -1.3 |      | clone 24787 mRNA sequence                                                                                           |               |
| 216005_at   | -1.3 |      | cDNA: FLJ20933 fis, clone ADSE01388                                                                                 |               |
| 205150_s_at | -1.4 |      | KIAA0644 gene product                                                                                               | KIAA0644      |
| 215067_x_at | -1.4 | -1   | Homo sapiens cDNA FLJ12333 fis, clone MAMMA1002198, highly similar to THIOREDOXIN PEROXIDASE 1                      |               |
| 207471_at   | -1.4 |      | Homo sapiens PRO1992 mRNA, complete cds.                                                                            | PRO1992       |
| 211515_s_at | -1.4 |      | Homo sapiens HDCMD38P mRNA, complete cds                                                                            | KIAA0472      |
| 41386_i_at  | -1.4 |      | Human mRNA for KIAA0346 gene, partial cds                                                                           |               |
| 221155_x_at | -1.4 |      | hypothetical protein PRO1496                                                                                        | PRO1496       |
| 211424_x_at | -1.4 |      | Homo sapiens PRO0066 mRNA, complete cds.                                                                            | DKFZP586A0522 |
| 215604_x_at | -1.4 |      | cDNA FLJ13721 fis, clone PLACE2000450                                                                               |               |
| 220719_at   | -1.4 |      | hypothetical protein FLJ13769 (FLJ13769)                                                                            | FLJ13769      |
| 215204_at   | -1.4 | -1.1 | cDNA FLJ14090 fis, clone MAMMA1000264                                                                               |               |
| 220906_at   | -1.4 |      | hypothetical protein FLJ13885 (FLJ13885)                                                                            | FLJ13885      |
| 215150_at   | -1.4 |      | clone HQ0131 PRO0131                                                                                                |               |
| 221120_at   | -1.4 |      | hypothetical protein FLJ20306 (FLJ20306)                                                                            | FLJ20306      |
| 214293_at   | -1.4 |      | hypothetical protein FLJ10849                                                                                       | FLJ10849      |
| 222286_at   | -1.4 |      | ESTs                                                                                                                |               |
| 221625_at   | -1.4 |      | cDNA DKFZp761G18121 (from clone DKFZp761G18121)                                                                     |               |
| 220720_x_at | -1.4 |      | hypothetical protein FLJ14346 (FLJ14346)                                                                            | FLJ14346      |
| 219071_x_at | -1.4 |      | hypothetical protein (LOC51236)                                                                                     | LOC51236      |
| 214807_at   | -1.4 |      | mRNA; cDNA DKFZp564O0862 (from clone DKFZp564O0862)                                                                 |               |
| 215786_at   | -1.4 |      | cDNA FLJ12108 fis, clone MAMMA1000009                                                                               |               |
| 219834_at   | -1.4 |      | hypothetical protein FLJ21579 (FLJ21579)                                                                            | FLJ21579      |
| 215435_at   | -1.4 |      | cDNA FLJ11921 fis, clone HEMBB1000318                                                                               |               |
| 208137_x_at | -1.4 |      | hypothetical protein MGC5384 (MGC5384)                                                                              | MGC5384       |
| 209288_s_at | -1.4 |      | mRNA; cDNA DKFZp434A0530 (from clone DKFZp434A0530)                                                                 |               |
| 220338_at   | -1.4 |      | hypothetical protein FLJ10244 (FLJ10244)                                                                            | FLJ10244      |
| 215191_at   | -1.4 |      | cDNA FLJ14085 fis, clone HEMBB1002534                                                                               |               |
| 219975_x_at | -1.4 |      | hypothetical protein FLJ11106 (FLJ11106)                                                                            | FLJ11106      |

|             |      |      |                                                                                                                                                                                       |              |
|-------------|------|------|---------------------------------------------------------------------------------------------------------------------------------------------------------------------------------------|--------------|
| 44822_s_at  | -1.4 |      | IMAGE-2501711                                                                                                                                                                         |              |
| 216287_at   | -1.4 |      | cDNA FLJ11868 fis, clone HEMBA1006993                                                                                                                                                 |              |
| 216114_at   | -1.4 |      | mRNA; cDNA DKFZp586H201 (from clone DKFZp586H201)                                                                                                                                     |              |
| 219472_at   | -1.4 |      | hypothetical protein MGC11266 (MGC11266)                                                                                                                                              | MGC11266     |
| 213413_at   | -1.4 | -1.6 | cDNA FLJ13555 fis, clone PLACE1007677                                                                                                                                                 |              |
| 212772_s_at | -1.4 |      | cDNA DKFZp547P193 (from clone DKFZp547P193); partial cds                                                                                                                              | DKFZp547P193 |
| 71933_at    | -1.4 |      | IMAGE-1845931                                                                                                                                                                         |              |
| 220537_at   | -1.4 |      | hypothetical protein FLJ20126 (FLJ20126)                                                                                                                                              | FLJ20126     |
| 210679_x_at | -1.4 |      | clone MGC:3878, mRNA, complete cds                                                                                                                                                    | BCL7A        |
| 215373_x_at | -1.4 |      | hypothetical protein FLJ12151                                                                                                                                                         | FLJ12151     |
| 214068_at   | -1.4 |      | clone 24505 mRNA sequence                                                                                                                                                             |              |
| 216206_x_at | -1.4 |      | clone IMAGE:3829438, mRNA, partial cds                                                                                                                                                |              |
| 217519_at   | -1.4 |      | ESTs                                                                                                                                                                                  |              |
| 217653_x_at | -1.4 |      | ESTs                                                                                                                                                                                  |              |
| 215063_x_at | -1.4 |      | mRNA; cDNA DKFZp547B026 (from clone DKFZp547B026)                                                                                                                                     |              |
| 208246_x_at | -1.4 |      | hypothetical protein FLJ20006 (FLJ20006)                                                                                                                                              | FLJ20006     |
| 207365_x_at | -1.4 |      | KIAA0570 gene product                                                                                                                                                                 | KIAA0570     |
| 212354_at   | -1.5 |      | KIAA1077 protein                                                                                                                                                                      | KIAA1077     |
| 213089_at   | -1.5 |      | Human DNA sequence from clone RP11-110H4 on chromosome 5 Contains a pseudogene similar to GUSB (glucuronidase, beta), a gene for a membrane protein, ESTs, STSs, GSSs and CpG islands |              |
| 219717_at   | -1.5 |      | hypothetical protein FLJ20280 (FLJ20280)                                                                                                                                              | FLJ20280     |
| 215688_at   | -1.5 |      | mRNA full length insert cDNA clone EUROIMAGE 288936                                                                                                                                   |              |
| 48031_r_at  | -1.5 | -1.7 | IMAGE-241806                                                                                                                                                                          |              |
| 213001_at   | -1.5 |      | clone 23767 and 23782 mRNA sequences                                                                                                                                                  |              |
| 220398_at   | -1.5 |      | hypothetical protein MGC4170 (MGC4170)                                                                                                                                                | MGC4170      |
| 215801_at   | -1.5 |      | mRNA; cDNA DKFZp434G1615 (from clone DKFZp434G1615)                                                                                                                                   |              |
| 220774_at   | -1.5 |      | hypothetical protein FLJ20071 (FLJ20071)                                                                                                                                              | FLJ20071     |
| 218309_at   | -1.5 | -1.3 | hypothetical protein PRO1489 (PRO1489)                                                                                                                                                | PRO1489      |
| 215057_at   | -1.5 |      | clone 161455 breast expressed mRNA from chromosome X                                                                                                                                  |              |
| 215246_at   | -1.5 |      | cDNA FLJ20082 fis, clone COL03245                                                                                                                                                     |              |
| 214715_x_at | -1.5 |      | mRNA for FLJ00032 protein, partial cds                                                                                                                                                |              |
| 44040_at    | -1.5 |      | IMAGE-936607                                                                                                                                                                          |              |
| 215588_x_at | -1.5 |      | cDNA: FLJ21305 fis, clone COL02124                                                                                                                                                    |              |
| 215602_at   | -1.5 |      | mRNA for FLJ00048 protein, partial cds                                                                                                                                                | FLJ00048     |
| 220944_at   | -1.5 |      | hypothetical protein SBB167 (LOC57115)                                                                                                                                                | LOC57115     |
| 215864_at   | -1.5 |      | cDNA: FLJ21424 fis, clone COL04157                                                                                                                                                    |              |
| 215284_at   | -1.5 |      | clone 24407 mRNA sequence                                                                                                                                                             |              |
| 216012_at   | -1.5 |      | unidentified mRNA, partial sequence                                                                                                                                                   |              |
| 215179_x_at | -1.5 |      | cDNA FLJ13781 fis, clone PLACE4000465                                                                                                                                                 |              |
| 216090_x_at | -1.5 |      | mRNA full length insert cDNA clone EUROIMAGE 117929                                                                                                                                   |              |
| 34206_at    | -1.5 |      | Homo sapiens mRNA for KIAA0782 protein, partial cds                                                                                                                                   |              |
| 217310_s_at | -1.6 |      | KIAA1041 protein                                                                                                                                                                      | KIAA1041     |
| 212233_at   | -1.6 | -1.3 | mRNA for 3UTR of unknown protein                                                                                                                                                      |              |
| 220517_at   | -1.6 |      | hypothetical protein FLJ10381 (FLJ10381)                                                                                                                                              | FLJ10381     |
| 220195_at   | -1.6 |      | hypothetical protein FLJ11113 (FLJ11113)                                                                                                                                              | FLJ11113     |
| 204665_at   | -1.6 |      | hypothetical protein FLJ21168 (FLJ21168)                                                                                                                                              | FLJ21168     |
| 215625_at   | -1.6 |      | cDNA FLJ10586 fis, clone NT2RP2003986                                                                                                                                                 |              |
| 220580_at   | -1.6 |      | hypothetical protein FLJ22476 (FLJ22476)                                                                                                                                              | FLJ22476     |
| 213909_at   | -1.6 |      | cDNA FLJ12280 fis, clone MAMMA1001744                                                                                                                                                 |              |
| 216527_at   | -1.6 |      | mRNA; cDNA DKFZp564D193 (from clone DKFZp564D193)                                                                                                                                     |              |
| 216440_at   | -1.6 |      | cDNA: FLJ21215 fis, clone COL00526                                                                                                                                                    |              |
| 215957_at   | -1.6 |      | unknown mRNA, sequence                                                                                                                                                                |              |
| 215888_at   | -1.6 |      | cDNA: FLJ23236 fis, clone COL00725                                                                                                                                                    |              |
| 208120_x_at | -1.6 |      | hypothetical protein FKSG63 (FKSG63)                                                                                                                                                  | FKSG63       |
| 215768_at   | -1.7 |      | mRNA; cDNA DKFZp564P016 (from clone DKFZp564P016)                                                                                                                                     |              |
| 220063_at   | -1.7 |      | hypothetical protein FLJ13273 (FLJ13273)                                                                                                                                              | FLJ13273     |
| 215306_at   | -1.7 | -2.3 | mRNA; cDNA DKFZp586N2020 (from clone DKFZp586N2020)                                                                                                                                   |              |
| 220484_at   | -1.7 |      | hypothetical protein FLJ11006 (FLJ11006)                                                                                                                                              | FLJ11006     |
| 215628_x_at | -1.7 |      | mRNA; cDNA DKFZp564M193 (from clone DKFZp564M193)                                                                                                                                     |              |
| 218211_s_at | -1.7 | -1.6 | hypothetical protein MGC2771 (MGC2771)                                                                                                                                                | MGC2771      |
| 215439_x_at | -1.7 |      | cDNA FLJ11924 fis, clone HEMBB1000343                                                                                                                                                 |              |
| 215206_at   | -1.7 |      | cDNA: FLJ21490 fis, clone COL05464                                                                                                                                                    |              |
| 219572_at   | -1.7 | -1.4 | hypothetical protein FLJ20761 (FLJ20761)                                                                                                                                              | FLJ20761     |
| 216110_x_at | -1.7 |      | cDNA FLJ14080 fis, clone HEMBB1002152                                                                                                                                                 |              |
| 217554_at   | -1.7 |      | ESTs                                                                                                                                                                                  |              |
| 216647_at   | -1.7 |      | mRNA; cDNA DKFZp586L1824 (from clone DKFZp586L1824)                                                                                                                                   |              |
| 217449_at   | -1.7 |      | mRNA; cDNA DKFZp434D1516 (from clone DKFZp434D1516)                                                                                                                                   |              |
| 212574_x_at | -1.7 |      | chromosome 19, cosmid R32184                                                                                                                                                          |              |
| 59433_at    | -1.7 |      | IMAGE-272275                                                                                                                                                                          |              |
| 217042_at   | -1.7 |      | mRNA; cDNA DKFZp564M1462 (from clone DKFZp564M1462); partial cds                                                                                                                      |              |
| 217164_at   | -1.7 |      | cDNA FLJ14046 fis, clone HEMBA1006461                                                                                                                                                 |              |
| 216444_at   | -1.7 |      | cDNA FLJ14076 fis, clone HEMBB1001925                                                                                                                                                 |              |
| 216175_at   | -1.7 |      | cDNA: FLJ21623 fis, clone COL07915                                                                                                                                                    |              |
| 216229_x_at | -1.7 |      | H.sapiens HCG II mRNA.                                                                                                                                                                | HCGII-7      |
| 222073_at   | -1.8 |      | ESTs                                                                                                                                                                                  |              |
| 215479_at   | -1.8 | -1.4 | cDNA FLJ20780 fis, clone COL04256                                                                                                                                                     |              |
| 216499_at   | -1.8 |      | mRNA; cDNA DKFZp434K0610 (from clone DKFZp434K0610)                                                                                                                                   |              |
| 220523_at   | -1.8 |      | hypothetical protein FLJ22601 (FLJ22601)                                                                                                                                              | FLJ22601     |
| 215250_at   | -1.8 |      | cDNA FLJ12140 fis, clone MAMMA1000340                                                                                                                                                 |              |
| 215132_at   | -1.8 |      | mRNA; cDNA DKFZp434E2423 (from clone DKFZp434E2423)                                                                                                                                   |              |
| 220586_at   | -1.8 |      | hypothetical protein FLJ12178 (FLJ12178)                                                                                                                                              | FLJ12178     |
| 209436_at   | -1.8 |      | Homo sapiens mRNA for KIAA0762 protein, partial cds.                                                                                                                                  | KIAA0762     |
| 220572_at   | -1.9 |      | hypothetical protein DKFZp547G183 (DKFZp547G183)                                                                                                                                      | DKFZp547G183 |
| 216051_x_at | -1.9 |      | cDNA FLJ11983 fis, clone HEMBB1001337                                                                                                                                                 |              |
| 214920_at   | -1.9 |      | cDNA FLJ11022 fis, clone PLACE1003771                                                                                                                                                 |              |
| 220467_at   | -1.9 |      | hypothetical protein FLJ21272 (FLJ21272)                                                                                                                                              | FLJ21272     |
| 215825_at   | -1.9 |      | clone 24487 mRNA sequence                                                                                                                                                             |              |
| 215405_at   | -1.9 |      | cDNA: FLJ21419 fis, clone COL04084                                                                                                                                                    |              |

|             |      |      |                                                                                                            |               |
|-------------|------|------|------------------------------------------------------------------------------------------------------------|---------------|
| 215311_at   | -1.9 |      | mRNA full length insert cDNA clone EUROIMAGE 21920                                                         |               |
| 214078_at   | -2   |      | clone 24540 mRNA sequence                                                                                  |               |
| 222300_at   | -2   |      | ESTs                                                                                                       |               |
| 216595_at   | -2   |      | mRNA; cDNA DKFZp564D042 (from clone DKFZp564D042)                                                          |               |
| 213429_at   | -2   |      | cDNA DKFZp564B222 (from clone DKFZp564B222)                                                                |               |
| 221011_s_at | -2   |      | hypothetical protein DKFZp566J091 (DKFZP566J091)                                                           | DKFZP566J091  |
| 215039_at   | -2   |      | Homo sapiens cDNA FLJ11317 fis, clone PLACE1010261, moderately similar to<br>SEGREGATION DISTORTER PROTEIN |               |
| 216086_at   | -2   |      | Homo sapiens mRNA for KIAA1054 protein, partial cds.                                                       | KIAA1054      |
| 220608_s_at | -2   |      | PRO1914 protein                                                                                            | PRO1914       |
| 215597_x_at | -2.1 |      | cDNA FLJ11353 fis, clone HEMBA1000042                                                                      |               |
| 205955_at   | -2.2 |      | hypothetical protein FLJ11136 (FLJ11136)                                                                   | FLJ11136      |
| 218974_at   | -2.2 | -1.4 | hypothetical protein FLJ10159 (FLJ10159)                                                                   | FLJ10159      |
| 220575_at   | -2.2 |      | hypothetical protein FLJ11800 (FLJ11800)                                                                   | FLJ11800      |
| 213125_at   | -2.2 |      | DKFZP586L151 protein                                                                                       | DKFZP586L151  |
| 213241_at   | -2.2 | -1.5 | clone 23785 mRNA sequence                                                                                  |               |
| 216712_at   | -2.2 |      | mRNA; cDNA DKFZp762O1415 (from clone DKFZp762O1415)                                                        |               |
| 222115_x_at | -2.3 |      | Similar to RIKEN cDNA 3930401K13 gene, clone IMAGE:3454556, mRNA, partial cds                              |               |
| 220509_at   | -2.3 |      | hypothetical protein PRO1777 (PRO1777)                                                                     | PRO1777       |
| 221144_at   | -2.3 |      | hypothetical protein PRO1048 (PRO1048)                                                                     | PRO1048       |
| 219895_at   | -2.4 |      | hypothetical protein FLJ20716 (FLJ20716)                                                                   | FLJ20716      |
| 220096_at   | -2.4 |      | hypothetical protein FLJ20378 (FLJ20378)                                                                   | FLJ20378      |
| 216745_x_at | -2.4 |      | cDNA: FLJ20953 fis, clone ADSE01979                                                                        |               |
| 220232_at   | -2.5 |      | hypothetical protein FLJ21032 (FLJ21032)                                                                   | FLJ21032      |
| 216219_at   | -2.5 |      | mRNA; cDNA DKFZp434D2030 (from clone DKFZp434D2030); partial cds                                           |               |
| 215028_at   | -2.6 |      | mRNA from chromosome 5q21-22, clone: FBR89                                                                 |               |
| 201295_s_at | -2.7 |      | DKFZP564A122 protein                                                                                       | DKFZP564A122  |
| 222320_at   | -2.7 |      | ESTs                                                                                                       |               |
| 215515_at   | -2.8 |      | mRNA; cDNA DKFZp564G103 (from clone DKFZp564G103)                                                          |               |
| 220193_at   | -3.6 | -1.3 | hypothetical protein FLJ22938 (FLJ22938)                                                                   | FLJ22938      |
| 213872_at   |      | 5.5  | hypothetical protein FLJ12619                                                                              | FLJ12619      |
| 215220_s_at |      | 4.3  | Homo sapiens cDNA FLJ13049 fis, clone NT2RP3001428, highly similar to<br>NUCLEOPROTEIN TPR.                |               |
| 218147_s_at |      | 3.9  | Homo sapiens AD-017 protein (LOC55830), mRNA.                                                              | LOC55830      |
| 214985_at   |      | 3.8  | Homo sapiens clone 24739 mRNA sequence.                                                                    |               |
| 221595_at   |      | 3.6  | mRNA; cDNA DKFZp564O0523 (from clone DKFZp564O0523)                                                        |               |
| 33148_at    |      | 3.4  | Cluster Incl. AI459274:tk11f11.x1 Homo sapiens cDNA, 3' end /clone=IMAGE-2150733                           |               |
| 215029_at   |      | 3.3  | mRNA; cDNA DKFZp586E2317 (from clone DKFZp586E2317)                                                        |               |
| 219279_at   |      | 2.8  | hypothetical protein FLJ20220                                                                              | FLJ20220      |
| 212220_at   |      | 2.6  | KIAA0077 protein                                                                                           | KIAA0077      |
| 218195_at   |      | 2.6  | hypothetical protein FLJ12910 (FLJ12910)                                                                   | FLJ12910      |
| 209512_at   | 1.1  | 2.5  | Similar to RIKEN cDNA 2610207116 gene, clone MGC:10940                                                     |               |
| 219905_at   |      | 2.5  | hypothetical protein PRO2801 (PRO2801)                                                                     | PRO2801       |
| 218784_s_at |      | 2.5  | hypothetical protein FLJ11101 (FLJ11101)                                                                   | FLJ11101      |
| 222180_at   |      | 2.4  | cDNA FLJ14122 fis, clone MAMMA1002033                                                                      |               |
| 204364_s_at |      | 2.3  | hypothetical protein FLJ13110                                                                              | FLJ13110      |
| 212926_at   |      | 2.2  | KIAA0594 protein                                                                                           | KIAA0594      |
| 204508_s_at |      | 2.2  | Homo sapiens, hypothetical protein FLJ20151, clone MGC:1073, mRNA, complete cds.                           | FLJ20151      |
| 216804_s_at |      | 2.2  | Homo sapiens cDNA: FLJ23564 fis, clone LNG10773                                                            |               |
| 221553_at   |      | 2.1  | mRNA; cDNA DKFZp564K142 (from clone DKFZp564K142)                                                          |               |
| 206500_s_at |      | 2.1  | hypothetical protein FLJ11186 (FLJ11186)                                                                   | FLJ11186      |
| 218167_at   |      | 2.1  | hypothetical protein (LOC51321)                                                                            | LOC51321      |
| 221263_s_at |      | 2.1  | hypothetical protein MGC3133 (MGC3133)                                                                     | MGC3133       |
| 206652_at   |      | 2.1  | hypothetical protein (HSPC050)                                                                             | HSPC050       |
| 218640_s_at |      | 2    | hypothetical protein FLJ13187 (FLJ13187)                                                                   | FLJ13187      |
| 206992_s_at |      | 2    | hypothetical protein (HSU79253)                                                                            | HSU79253      |
| 207170_s_at |      | 2    | DKFZP586A011 protein (DKFZP586A011)                                                                        | DKFZP586A011  |
| 217949_s_at |      | 2    | hypothetical protein IMAGE3455200 (IMAGE3455200)                                                           | IMAGE3455200  |
| 215252_at   |      | 2    | Homo sapiens cDNA: FLJ21350 fis, clone COL02751                                                            |               |
| 202537_s_at |      | 2    | Homo sapiens CGI-84 protein mRNA, complete cds.                                                            |               |
| 214805_at   |      | 1.8  | Human clone 23933 mRNA sequence                                                                            |               |
| 221826_at   |      | 1.8  | Homo sapiens cDNA FLJ12793 fis, clone NT2RP2002033                                                         |               |
| 217926_at   |      | 1.8  | Homo sapiens HSPC023 protein (HSPC023), mRNA                                                               | HSPC023       |
| 219043_s_at |      | 1.8  | Homo sapiens hypothetical protein MGC3062 (MGC3062), mRNA                                                  | MGC3062       |
| 212634_at   |      | 1.8  | KIAA0776 protein                                                                                           | KIAA0776      |
| 212979_s_at |      | 1.8  | Homo sapiens PRO2751 mRNA, complete cds                                                                    |               |
| 217717_s_at |      | 1.7  | GW128 protein                                                                                              | GW128         |
| 218751_s_at |      | 1.7  | Homo sapiens hypothetical protein FLJ11071 (FLJ11071), mRNA                                                | FLJ11071      |
| 219449_s_at |      | 1.7  | Homo sapiens hypothetical protein FLJ20533 (FLJ20533), mRNA                                                | FLJ20533      |
| 203762_s_at |      | 1.7  | CGI-60 protein                                                                                             | LOC51626      |
| 202378_s_at |      | 1.7  | leptin receptor gene-related protein                                                                       | HSOBRGRP      |
| 212451_at   |      | 1.6  | KIAA0256 gene product                                                                                      | KIAA0256      |
| 218229_s_at |      | 1.6  | KIAA1513 protein (KIAA1513), mRNA                                                                          | KIAA1513      |
| 201917_s_at |      | 1.6  | hypothetical protein FLJ10618                                                                              | FLJ10618      |
| 218929_at   |      | 1.6  | Homo sapiens hypothetical protein FLJ20036 (FLJ20036), mRNA                                                | FLJ20036      |
| 212840_at   |      | 1.5  | KIAA0794                                                                                                   | KIAA0794      |
| 212720_at   |      | 1.5  | CL25022 (hypothetical protein)                                                                             | CL25022       |
| 201683_x_at |      | 1.5  | KIAA0737 gene product                                                                                      | KIAA0737      |
| 48808_at    |      | 1.5  | IMAGE-1704443                                                                                              |               |
| 212638_s_at |      | 1.5  | Homo sapiens mRNA; cDNA DKFZp434D2111 (from clone DKFZp434D2111)                                           |               |
| 214734_at   |      | 1.5  | Homo sapiens mRNA for KIAA0624 protein, partial cds.                                                       | KIAA0624      |
| 212749_s_at |      | 1.5  | DKFZP586C1620 protein                                                                                      | DKFZP586C1620 |
| 215780_s_at |      | 1.5  | Human DNA sequence from PAC 30P20 on chromosome Xq21.1-Xq21.3. Contains set<br>pseudogene, ESTs and STS    |               |
| 208795_s_at |      | 1.5  | Human mRNA for P1cdc47, complete cds.                                                                      |               |
| 220925_at   |      | 1.4  | hypothetical protein FLJ21613 similar to ratcorneal wound healing related protein                          | FLJ21613      |
| 213272_s_at |      | 1.4  | hypothetical protein from clone 24796                                                                      | LOC57146      |
| 218521_s_at |      | 1.4  | Homo sapiens hypothetical protein FLJ11011 (FLJ11011), mRNA                                                | FLJ11011      |
| 220295_x_at |      | 1.4  | Homo sapiens hypothetical protein FLJ20354 (FLJ20354), mRNA                                                | FLJ20354      |

|                 |      |                                                                                                             |               |
|-----------------|------|-------------------------------------------------------------------------------------------------------------|---------------|
| 216449_x_at     | 1.4  | Homo sapiens cDNA: FLJ22209 fis, clone HRC01496                                                             |               |
| 218605_at       | 1.4  | Homo sapiens hypothetical protein FLJ23182 (FLJ23182), mRNA                                                 | FLJ23182      |
| 219679_s_at     | 1.4  | Homo sapiens hypothetical protein PRO1741 (PRO1741), mRNA                                                   | PRO1741       |
| 212195_at       | 1.4  | Homo sapiens mRNA; cDNA DKFZp564F053 (from clone DKFZp564F053)                                              |               |
| 202852_s_at     | 1.4  | Homo sapiens hypothetical protein FLJ11506 (FLJ11506), mRNA                                                 | FLJ11506      |
| 201101_s_at     | 1.4  | KIAA0164 gene product                                                                                       | KIAA0164      |
| 209669_s_at     | 1.3  | Homo sapiens, Similar to DKFZP564M2423 protein, clone MGC:684, mRNA, complete cds                           |               |
| 201918_at       | 1.3  | hypothetical protein FLJ10618                                                                               | FLJ10618      |
| 214723_x_at     | 1.3  | Homo sapiens mRNA for KIAA1641 protein, partial cds.                                                        | KIAA1641      |
| 212388_at       | 1.3  | Homo sapiens mRNA for KIAA1057 protein, partial cds.                                                        | KIAA1057      |
| 218947_s_at     | 1.2  | Homo sapiens hypothetical protein FLJ10486 (FLJ10486), mRNA                                                 | FLJ10486      |
| 212442_s_at     | 1.2  | Homo sapiens cDNA: FLJ21238 fis, clone COL01115                                                             |               |
| 218449_at       | 1.2  | Homo sapiens hypothetical protein FLJ11200 (FLJ11200), mRNA                                                 | FLJ11200      |
| 202386_s_at     | 1.2  | Homo sapiens KIAA0430 gene product (KIAA0430), mRNA.                                                        | KIAA0430      |
| 219158_s_at     | 1.2  | Homo sapiens hypothetical protein FLJ13340 (FLJ13340), mRNA                                                 | FLJ13340      |
| 212632_at       | 1.2  | Homo sapiens clone 24889 mRNA sequence                                                                      |               |
| 219858_s_at     | 1.2  | Homo sapiens hypothetical protein FLJ20160 (FLJ20160), mRNA                                                 | FLJ20160      |
| 220083_x_at     | 1.2  | CGI-70 protein                                                                                              | LOC51630      |
| 212655_at       | 1.1  | Homo sapiens mRNA for KIAA0579 protein, partial cds.                                                        | KIAA0579      |
| 219387_at       | 1.1  | Homo sapiens hypothetical protein (LOC55580), mRNA.                                                         | LOC55580      |
| 212096_s_at     | 1.1  | Homo sapiens mRNA; cDNA DKFZp586D1519 (from clone DKFZp586D1519).                                           | KIAA1288      |
| 212232_at       | 1.1  | Homo sapiens mRNA for KIAA1014 protein, partial cds.                                                        | KIAA1014      |
| 212402_at       | 1.1  | KIAA0853 protein                                                                                            | KIAA0853      |
| 219503_s_at     | 1.1  | Homo sapiens hypothetical protein FLJ11036 (FLJ11036), mRNA                                                 | FLJ11036      |
| 214949_at       | 1.1  | Homo sapiens mRNA; cDNA DKFZp586L141 (from clone DKFZp586L141)                                              |               |
| 219496_at       | 1.1  | Homo sapiens hypothetical protein FLJ21870 (FLJ21870), mRNA                                                 | FLJ21870      |
| 212644_s_at     | 1.1  | Homo sapiens cDNA: FLJ21927 fis, clone HEP04178, highly similar to HSU90909 Human clone 23722 mRNA sequence |               |
| 212228_s_at     | 1.1  | hypothetical protein DKFZp434K046                                                                           | DKFZp434K046  |
| 213617_s_at     | 1.1  | DKFZP586M1523 protein                                                                                       | DKFZP586M1523 |
| 212397_at       | 1.1  | Homo sapiens mRNA; cDNA DKFZp434I0812 (from clone DKFZp434I0812); partial cds                               |               |
| 218108_at       | 1.1  | Homo sapiens hypothetical protein FLJ10483 (FLJ10483), mRNA                                                 | FLJ10483      |
| 216101_at       | 1    | Homo sapiens mRNA; cDNA DKFZp564B083 (from clone DKFZp564B083)                                              |               |
| 221580_s_at     | 1    | Homo sapiens, clone MGC:5306, mRNA, complete cds                                                            |               |
| 210463_x_at     | 1    | Homo sapiens, hypothetical protein FLJ20244, clone MGC:1066, mRNA, complete cds                             |               |
| 202060_at       | 1    | Homo sapiens KIAA0155 gene product (KIAA0155), mRNA                                                         | KIAA0155      |
| 202753_at       | 1    | Homo sapiens KIAA0107 gene product (KIAA0107), mRNA.                                                        | KIAA0107      |
| 201083_s_at     | 1    | KIAA0164 gene product                                                                                       | KIAA0164      |
| 209711_at       | 1    | KIAA0260 protein                                                                                            | KIAA0260      |
| 219474_at       | 1    | Homo sapiens hypothetical protein FLJ23186 (FLJ23186), mRNA                                                 | FLJ23186      |
| 215577_at       | -1   | Homo sapiens cDNA FLJ12000 fis, clone HEMMB1001531                                                          | HEMMB1001531  |
| 214749_s_at     | -1   | Homo sapiens cDNA FLJ20811 fis, clone ADSE01435.                                                            | FLJ20811      |
| 212323_s_at     | -1   | KIAA0453 protein                                                                                            | KIAA0453      |
| 32091_at        | -1   | Homo sapiens mRNA for KIAA0446 protein, complete cds                                                        |               |
| 212450_at       | -1   | Homo sapiens mRNA for KIAA0256 protein, partial cds.                                                        | KIAA0256      |
| 208851_s_at     | -1   | Homo sapiens mRNA; cDNA DKFZp761B15121 (from clone DKFZp761B15121); complete cds                            |               |
| 220708_at       | -1   | Homo sapiens hypothetical protein FLJ11370 (FLJ11370), mRNA                                                 | FLJ11370      |
| 58900_at        | -1   | IMAGE-990806                                                                                                |               |
| 218630_at       | -1   | Homo sapiens hypothetical protein FLJ20345 (FLJ20345), mRNA                                                 | FLJ20345      |
| 220079_s_at     | -1   | Homo sapiens hypothetical protein FLJ11328 (FLJ11328), mRNA                                                 | FLJ11328      |
| 218394_at       | -1   | Homo sapiens hypothetical protein FLJ22386 (FLJ22386), mRNA                                                 | FLJ22386      |
| 207283_at       | -1   | Homo sapiens hypothetical protein DKFZp547I014 (DKFZp547I014), mRNA                                         | DKFZp547I014  |
| 218020_s_at     | -1   | Homo sapiens hypothetical protein FLJ13222 (FLJ13222), mRNA                                                 | FLJ13222      |
| 54632_at        | -1   | IMAGE-1855342                                                                                               |               |
| 46665_at        | -1   | IMAGE-2470926                                                                                               |               |
| 64064_at        | -1   | IMAGE-2126397                                                                                               |               |
| 53912_at        | -1   | IMAGE-301963                                                                                                |               |
| 217824_at       | -1   | CGI-76 protein                                                                                              | LOC51632      |
| 213625_at       | -1   | hypothetical protein P1 p373c6                                                                              |               |
| 40225_at        | -1   | Homo sapiens mRNA for HsGAK, complete cds                                                                   |               |
| 212946_at       | -1.1 | Homo sapiens cDNA: FLJ21779 fis, clone HEP00210.                                                            | KIAA0564      |
| 212124_at       | -1.1 | Homo sapiens clone 24800 mRNA sequence.                                                                     | KIAA1224      |
| 36129_at        | -1.1 | Homo sapiens KIAA0397 mRNA, complete cds                                                                    |               |
| 32259_at        | -1.1 | Human mRNA for KIAA0388 gene, complete cds                                                                  |               |
| 217719_at       | -1.1 | Homo sapiens HSPC025 (HSPC025), mRNA.                                                                       | HSPC025       |
| 203906_at       | -1.1 | KIAA0763 gene product                                                                                       | KIAA0763      |
| 213547_at       | -1.1 | Homo sapiens mRNA for KIAA0667 protein, partial cds.                                                        | KIAA0667      |
| 203169_at       | -1.1 | Homo sapiens KIAA0258 gene product (KIAA0258), mRNA.                                                        | KIAA0258      |
| AFFX-hum_alu_at | -1.1 | Human Alu-Sq subfamily consensus sequence.                                                                  |               |
| 221569_at       | -1.1 | Homo sapiens mRNA; cDNA DKFZp434N031 (from clone DKFZp434N031); complete cds                                |               |
| 220953_s_at     | -1.1 | Homo sapiens hypothetical protein (FLJ20476), mRNA                                                          | FLJ20476      |
| 219501_at       | -1.1 | Homo sapiens hypothetical protein FLJ10094 (FLJ10094), mRNA                                                 | FLJ10094      |
| 63009_at        | -1.1 | IMAGE-1723132                                                                                               |               |
| 53076_at        | -1.1 | IMAGE-1664324                                                                                               |               |
| 55081_at        | -1.1 | IMAGE-323922                                                                                                |               |
| 59697_at        | -1.1 | IMAGE-1090172                                                                                               |               |
| 218632_at       | -1.1 | Homo sapiens hypothetical protein FLJ21156 (FLJ21156), mRNA                                                 | FLJ21156      |
| 218637_at       | -1.1 | hypothetical protein IMPACT                                                                                 | IMPACT        |
| 60471_at        | -1.1 | IMAGE-1047339                                                                                               |               |
| 33323_r_at      | -1.1 | Cluster Incl. X57348:H.sapiens mRNA (clone 9112)                                                            |               |
| 33322_i_at      | -1.1 | Cluster Incl. X57348:H.sapiens mRNA (clone 9112)                                                            |               |
| 218771_at       | -1.1 | Homo sapiens hypothetical protein FLJ10782 (FLJ10782), mRNA                                                 | FLJ10782      |
| 65635_at        | -1.1 | DKFZp434M1928                                                                                               |               |
| 218916_at       | -1.1 | Homo sapiens hypothetical protein FLJ23436 (FLJ23436), mRNA                                                 | FLJ23436      |
| 49327_at        | -1.1 | IMAGE-2124784                                                                                               |               |
| 47571_at        | -1.1 | IMAGE-429176                                                                                                |               |
| 218902_at       | -1.2 | Homo sapiens hypothetical protein FLJ20005 (FLJ20005), mRNA                                                 | FLJ20005      |
| 212052_s_at     | -1.2 | Homo sapiens mRNA for KIAA0676 protein, partial cds.                                                        | KIAA0676      |

|             |      |                                                                                |               |
|-------------|------|--------------------------------------------------------------------------------|---------------|
| 206507_at   | -1.2 | Homo sapiens KIAA0426 gene product (KIAA0426), mRNA                            | KIAA0426      |
| 203355_s_at | -1.2 | Homo sapiens KIAA0942 protein (KIAA0942), mRNA.                                | KIAA0942      |
| 213196_at   | -1.2 | KIAA0326 protein                                                               | KIAA0326      |
| 208276_at   | -1.2 | Homo sapiens clone FLB7343 (LOC51221), mRNA.                                   | LOC51221      |
| 212395_s_at | -1.2 | KIAA0090 protein                                                               | KIAA0090      |
| 205250_s_at | -1.2 | Homo sapiens KIAA0373 gene product (KIAA0373), mRNA.                           | KIAA0373      |
| 202572_s_at | -1.1 | Homo sapiens KIAA0964 protein (KIAA0964), mRNA.                                | KIAA0964      |
| 45572_s_at  | -1.2 | IMAGE-2504821                                                                  |               |
| 222099_s_at | -1.2 | DKFZP434D1335 protein                                                          | DKFZP434D1335 |
| 213004_at   | -1.2 | Homo sapiens clone 23767 and 23782 mRNA sequences                              |               |
| 57532_at    | -1.2 | IMAGE-2712427                                                                  |               |
| 215154_at   | -1.2 | Homo sapiens mRNA; cDNA DKFZp434G043 (from clone DKFZp434G043)                 |               |
| 214052_x_at | -1.2 | KIAA1096 protein                                                               | KIAA1096      |
| 213393_at   | -1.2 | Human clone 23908 mRNA sequence                                                |               |
| 51158_at    | -1.2 | IMAGE-2270985                                                                  |               |
| 218010_x_at | -1.2 | Homo sapiens hypothetical protein MGC2479 (MGC2479), mRNA                      | MGC2479       |
| 213083_at   | -1.2 | Homo sapiens mRNA for putative Sqv-7-like protein, partial.                    | SQV7L         |
| 214744_s_at | -1.2 | Homo sapiens cDNA FLJ11898 fis, clone HEMBA1007322                             |               |
| 57739_at    | -1.2 | IMAGE-2473332                                                                  |               |
| 219765_at   | -1.2 | Homo sapiens hypothetical protein FLJ12586 (FLJ12586), mRNA                    | FLJ12586      |
| 216288_at   | -1.2 | Homo sapiens cDNA FLJ13867 fis, clone THYRO1001262                             |               |
| 60528_at    | -1.2 | IMAGE-299589                                                                   |               |
| 212970_at   | -1.2 | Homo sapiens mRNA; cDNA DKFZp434E033 (from clone DKFZp434E033)                 |               |
| 50376_at    | -1.2 | IMAGE-1891867                                                                  |               |
| 210360_s_at | -1.2 | Homo sapiens PRO1941 mRNA, complete cds.                                       | KIAA0429      |
| 213085_s_at | -1.3 | Homo sapiens mRNA for KIAA0869 protein, partial cds.                           | KIAA0869      |
| 221621_at   | -1.3 | Homo sapiens clone FLB3442 PRO0872 mRNA, complete cds.                         |               |
| 213628_at   | -1.3 | KIAA0761 protein                                                               | KIAA0761      |
| 212353_at   | -1.3 | KIAA1077 protein                                                               | KIAA1077      |
| 215766_at   | -1.3 | Homo sapiens mRNA; cDNA DKFZp434D044 (from clone DKFZp434D044)                 |               |
| 212767_x_at | -1.3 | hypothetical protein PRO2900                                                   | PRO2900       |
| 36552_at    | -1.3 | Homo sapiens mRNA; cDNA DKFZp586P0123 (from clone DKFZp586P0123)               |               |
| 50277_at    | -1.3 | IMAGE-990785                                                                   |               |
| 218776_s_at | -1.3 | Homo sapiens hypothetical protein FLJ23375 (FLJ23375), mRNA                    | FLJ23375      |
| 214798_at   | -1.3 | Homo sapiens cDNA: FLJ21771 fis, clone COLF7779                                |               |
| 44783_s_at  | -1.3 | IMAGE-37665                                                                    |               |
| 213904_at   | -1.3 | Homo sapiens mRNA; cDNA DKFZp547E184 (from clone DKFZp547E184)                 |               |
| 45749_at    | -1.3 | IMAGE-743210                                                                   |               |
| 217481_x_at | -1.3 | Homo sapiens mRNA; cDNA DKFZp586F1622 (from clone DKFZp586F1622)               |               |
| 52255_s_at  | -1.3 | IMAGE-2562160                                                                  |               |
| 213485_s_at | -1.3 | Homo sapiens mRNA for FLJ00002 protein, partial cds                            |               |
| 217335_at   | -1.3 | Homo sapiens cDNA FLJ13477 fis, clone PLACE1003638                             | FLJ11292      |
| 215903_s_at | -1.4 | KIAA0807 protein                                                               | KIAA0807      |
| 212755_at   | -1.4 | KIAA1040 protein                                                               | KIAA1040      |
| 219906_at   | -1.4 | Homo sapiens hypothetical protein FLJ10213 (FLJ10213), mRNA                    | FLJ10213      |
| 65718_at    | -1.4 | IMAGE-2243340                                                                  |               |
| 219874_at   | -1.4 | Homo sapiens hypothetical protein FLJ23188 (FLJ23188), mRNA                    | FLJ23188      |
| 220390_at   | -1.4 | Homo sapiens hypothetical protein FLJ23598 (FLJ23598), mRNA                    | FLJ23598      |
| 222116_s_at | -1.4 | Homo sapiens mRNA; cDNA DKFZp762O207 (from clone DKFZp762O207).                | FLJ20748      |
| 218687_s_at | -1.4 | Homo sapiens hypothetical protein FLJ20063 (FLJ20063), mRNA                    | FLJ20063      |
| 212281_s_at | -1.4 | hypothetical protein                                                           | MAC30         |
| 212447_at   | -1.4 | Homo sapiens HSPC284 mRNA, partial cds.                                        | DKFZP566C134  |
| 209794_at   | -1.5 | Homo sapiens KIAA0411 mRNA, complete cds.                                      | KIAA0411      |
| 213204_at   | -1.5 | Homo sapiens mRNA for KIAA0708 protein, partial cds.                           | KIAA0708      |
| 204793_at   | -1.5 | Homo sapiens KIAA0443 gene product (KIAA0443), mRNA.                           | KIAA0443      |
| 215034_s_at | -1.5 | Homo sapiens cDNA FLJ13302 fis, clone OVARC1001357                             |               |
| 56256_at    | -1.5 | IMAGE-491573                                                                   |               |
| 212991_at   | -1.5 | Homo sapiens mRNA; cDNA DKFZp434C0118 (from clone DKFZp434C0118); partial cds  |               |
| 220456_at   | -1.5 | Homo sapiens hypothetical protein FLJ11112 (FLJ11112), mRNA                    | FLJ11112      |
| 215235_at   | -1.5 | Homo sapiens mRNA; cDNA DKFZp564P0562 (from clone DKFZp564P0562); partial cds  |               |
| 213810_s_at | -1.5 | hypothetical protein FLJ10342                                                  | FLJ10342      |
| 221995_s_at | -1.5 | hypothetical protein MGC3243                                                   | MGC3243       |
| 212473_s_at | -1.5 | Homo sapiens cDNA: FLJ22463 fis, clone HRC10126                                |               |
| 219805_at   | -1.5 | Homo sapiens hypothetical protein FLJ22965 (FLJ22965), mRNA                    | FLJ22965      |
| 44654_at    | -1.5 | IMAGE-2314928                                                                  |               |
| 205434_s_at | -1.6 | KIAA1048 protein                                                               | KIAA1048      |
| 36030_at    | -1.6 | Homo sapiens mRNA; cDNA DKFZp586I2223 (from clone DKFZp586I2223)               |               |
| 218517_at   | -1.6 | Homo sapiens hypothetical protein FLJ22479 (FLJ22479), mRNA                    | FLJ22479      |
| 54970_at    | -1.6 | IMAGE-1408473                                                                  |               |
| 219525_at   | -1.6 | Homo sapiens hypothetical protein FLJ10847 (FLJ10847), mRNA                    | FLJ10847      |
| 204353_s_at | -1.6 | Homo sapiens, clone MGC:10280, mRNA, complete cds                              | DKFZP586D211  |
| 43427_at    | -1.6 | IMAGE-2488324                                                                  |               |
| 209459_s_at | -1.6 | Homo sapiens NPDP009 mRNA, complete cds.                                       | NPDP009       |
| 215461_at   | -1.6 | Homo sapiens chromosome 19, cosmid R31343                                      |               |
| 210703_at   | -1.7 | Homo sapiens PRO2259 mRNA, complete cds.                                       |               |
| 49452_at    | -1.7 | IMAGE-1667483                                                                  |               |
| 217490_at   | -1.7 | Homo sapiens mRNA; cDNA DKFZp564P073 (from clone DKFZp564P073)                 |               |
| 212662_at   | -1.7 | Homo sapiens cDNA: FLJ22296 fis, clone HRC04468                                |               |
| 214725_at   | -1.7 | Homo sapiens mRNA; cDNA DKFZp564O1262 (from clone DKFZp564O1262)               |               |
| 212980_at   | -1.7 | Homo sapiens mRNA; cDNA DKFZp586J101 (from clone DKFZp586J101)                 |               |
| 216142_at   | -1.7 | Homo sapiens mRNA; cDNA DKFZp434L092 (from clone DKFZp434L092)                 |               |
| 218330_s_at | -1.7 | Homo sapiens hypothetical protein FLJ10633 (FLJ10633), mRNA                    | FLJ10633      |
| 214983_at   | -1.7 | Homo sapiens mRNA; cDNA DKFZp434I143 (from clone DKFZp434I143).                | DKFZP434I143  |
| 40016_g_at  | -1.8 | Human mRNA for KIAA0303 gene, partial cds                                      |               |
| 215525_at   | -1.8 | Homo sapiens mRNA; cDNA DKFZp586A0423 (from clone DKFZp586A0423).              |               |
| 213316_at   | -1.8 | Homo sapiens mRNA; cDNA DKFZp586L0120 (from clone DKFZp586L0120)               |               |
| 208964_s_at | -1.8 | Homo sapiens mRNA; cDNA DKFZp762M2311 (from clone DKFZp762M2311); complete cds |               |
| 214719_at   | -1.8 | Homo sapiens cDNA: FLJ23067 fis, clone LNG04993                                |               |



|             |         |                                                                                              |                  |
|-------------|---------|----------------------------------------------------------------------------------------------|------------------|
| 213924_at   | -1.8    | hypothetical protein FLJ11585                                                                | FLJ11585         |
| 213422_s_at | -1.9    | Homo sapiens mRNA; cDNA DKFZp586E2023 (from clone DKFZp586E2023)                             |                  |
| 218651_s_at | -1.9    | Homo sapiens hypothetical protein FLJ11196 (FLJ11196), mRNA                                  | FLJ11196         |
| 217132_at   | -1.9    | Homo sapiens clone 24587 mRNA sequence.                                                      |                  |
| 212494_at   | -2      | Homo sapiens mRNA for KIAA1075 protein, partial cds.                                         | KIAA1075         |
| 213836_s_at | -1.1 -2 | KIAA1001 protein                                                                             | KIAA1001         |
| 37547_at    | -2      | Human clone IMAGE-22181 unknown protein mRNA, partial cds                                    |                  |
| 39549_at    | -2      | IMAGE-2372060                                                                                |                  |
| 215314_at   | -2      | Homo sapiens cDNA FLJ10270 fis, clone HEMBB1001096                                           |                  |
| 206048_at   | -2.1    | Homo sapiens putative zinc finger protein from EUROIMAGE 566589 (LOC58495), mRNA.            | LOC58495         |
| 220376_at   | -2.4    | Homo sapiens hypothetical protein FLJ21302 (FLJ21302), mRNA                                  | FLJ21302         |
| 214951_at   | -2.5    | Homo sapiens mRNA; cDNA DKFZp564M1916 (from clone DKFZp564M1916); partial cds                |                  |
| 222078_at   | -2.7    | KIAA1535 protein                                                                             | KIAA1535         |
| 56748_at    | -2.7    | Cluster Incl. X90539:HSGT483 Homo sapiens cDNA                                               |                  |
| 220615_s_at | -2.8    | Homo sapiens hypothetical protein FLJ10462 (FLJ10462), mRNA                                  | FLJ10462         |
| 218899_s_at | -3.3    | Homo sapiens hypothetical protein FLJ12015 (FLJ12015), mRNA                                  | FLJ12015         |
| 216415_at   | -3.5    | Homo sapiens cDNA: FLJ23140 fis, clone LNG09065                                              |                  |
| 219619_at   | -3.6    | Homo sapiens hypothetical protein DKFZp761C07121 (DKFZp761C07121), mRNA                      |                  |
| 213609_s_at | -3.8    | Homo sapiens mRNA for KIAA0927 protein, partial cds.                                         | KIAA0927         |
| 219973_at   | -5.3    | Homo sapiens hypothetical protein FLJ23548 (FLJ23548), mRNA                                  | FLJ23548         |
| 217959_s_at | 2.3     | Homo sapiens PTD009 protein                                                                  | PTD009           |
| 218728_s_at | 1.3     | Homo sapiens HSPC163 protein (HSPC163), mRNA.                                                | HSPC163          |
| 217907_at   | 1.1     | Homo sapiens HSPC071 protein (HSPC071), mRNA                                                 | HSPC071          |
| 216347_s_at | -1.2    | Homo sapiens cDNA FLJ13126 fis, clone NT2RP3002909, weakly similar to P53-BINDING PROTEIN 2. | KIAA0771 protein |
| 220940_at   | -1.1    | Homo sapiens KIAA1641 protein (KIAA1641), mRNA. /hypothetical protein FLJ21281               | KIAA1641         |
| 204403_x_at | -1.4    | Homo sapiens KIAA0738 gene product (KIAA0738), mRNA.                                         | KIAA0738         |
| 218631_at   | -1      | Homo sapiens hypothetical protein PP5395 (PP5395), mRNA.                                     | PP5395           |
| 212956_at   | -1.2    | KIAA0882 protein                                                                             | KIAA0882         |
| 206169_x_at | -1.3    | Homo sapiens KIAA1031 protein (KIAA1031), mRNA.                                              | KIAA1031         |
| 209883_at   | -1.4    | Homo sapiens C1orf17 mRNA, complete cds.                                                     | KIAA0584         |
| 205096_at   | -1      | Homo sapiens KIAA0618 gene product (KIAA0618), mRNA.                                         | KIAA0618         |
| 211454_x_at | -1.6    | Homo sapiens FKSG51 (FKSG51) mRNA, complete cds                                              | FKSG51           |
| 214034_at   | -1.7    | Homo sapiens mRNA for KIAA0525 protein, partial cds.                                         | KIAA0525         |

List of the genes that are differentially expressed in  $\alpha 6^{+}/\text{MHCI}^{-}$  cells and in  $\alpha 6^{+}/\text{MHCI}^{+}$  cells. Entire Affymetrix probe set and their annotated genes that are up-regulated  $\geq 2$ -fold in either  $\alpha 6^{+}/\text{MHCI}^{-}$  cells or  $\alpha 6^{+}/\text{MHCI}^{+}$  cells sorted according to their functions. Some of the genes are involved in multiple processes in the cell and could be placed in several tables. The table shows the difference in the expression  $\alpha 6^{+}/\text{MHCI}^{+}$  cells vs.  $\alpha 6^{+}/\text{MHCI}^{-}$  cells. “-“sign indicates that the gene is upregulated in  $\alpha 6^{+}/\text{MHCI}^{-}$  cells. The numbers that show the difference in the level of gene expression are in log2 scale.
