# Supplementary material for: Transcriptional profiling of putative human epithelial stem cells
Source: PubMed Central journal article supplement (PMC2536675; doi:10.1186/1471-2164-9-359), 2008-07-30
Supplement: 1471-2164-9-359-S2.pdf [file 1471-2164-9-359-S2.pdf]

| Probe Set   | Exp. 1<br>Signal<br>Log Ratio | Exp. 2<br>Signal<br>Log Ratio | Description                                                                                                  | Gene Symbol |
|-------------|-------------------------------|-------------------------------|--------------------------------------------------------------------------------------------------------------|-------------|
| 1053_at     | 1.3                           | 0.8                           | Human replication factor C, 40-kDa subunit (A1) mRNA, complete cds                                           |             |
| 200041_s_at | 1.7                           | 1                             | HLA-B associated transcript-1                                                                                | D6S81E      |
| 200072_s_at | 0.6                           | 1.3                           | M4 protein deletion mutant                                                                                   | HNRPM       |
| 200079_s_at | 0.6                           | 0.3                           | lysyl-tRNA synthetase                                                                                        | KARS        |
| 200593_s_at | 0.8                           | 0.1                           | heterogeneous nuclear ribonucleoprotein U(scaffold attachment factor A)                                      | HNRPU       |
| 200602_at   | -0.6                          | -1.2                          | amyloid beta (A4) precursor protein (proteasexin-II, Alzheimer disease)                                      | APP         |
| 200613_at   | 0.5                           | 1.3                           | adaptor-related protein complex 2, mu 1 subunit                                                              | AP2M1       |
| 200638_s_at | 0.3                           | 2.2                           | tyrosine 3-monooxygenasetryptophan5-monooxygenase activation protein, zeta polypeptide                       | YWHAZ       |
| 200644_at   | -1.8                          | -1                            | macrophage myristoylated alanine-rich C kinasesubstrate                                                      | MACMARCKS   |
| 200662_s_at | 0.4                           | 0.7                           | translocase of outer mitochondrial membrane 20(yeast) homolog                                                | KIAA0016    |
| 200669_s_at | 0.6                           | 0.5                           | ubiquitin-conjugating enzyme E2D 3 (homologousto yeast UBC45)                                                | UBE2D3      |
| 200685_at   | 0.3                           | 0.1                           | splicing factor, arginineserine-rich 11                                                                      | SFRS11      |
| 200692_s_at | 1.3                           | 2.7                           | heat shock 70kD protein 9B (mortalin-2)                                                                      | HSPA9B      |
| 200693_at   | 0.4                           | 0.4                           | tyrosine 3-monooxygenasetryptophan5-monooxygenase activation protein, theta polypeptide                      | YWHAQ       |
| 200728_at   | 0.7                           | 2                             | ARP2 (actin-related protein 2, yeast) homolog                                                                | ACTR2       |
| 200737_at   | 0.7                           | 0.8                           | phosphoglycerate kinase 1                                                                                    | PGK1        |
| 200745_s_at | 0.7                           | 0.4                           | beta-subunit signal transducing proteins GSGI                                                                | GNB1        |
| 200750_s_at | 0.9                           | 3.5                           | GTP binding protein                                                                                          | RAN         |
| 200751_s_at | 0.9                           | 1.7                           | heterogeneous nuclear ribonucleoprotein C (C1C2)                                                             | HNRPC       |
| 200760_s_at | 0.9                           | 1.2                           | vitamin A responsive; cytoskeleton related                                                                   | JWA         |
| 200762_at   | -1.9                          | -1.9                          | dihydropyrimidinase-like 2                                                                                   | DPYSL2      |
| 200806_s_at | 1.8                           | 1.7                           | heat shock 60kD protein 1 (chaperonin)                                                                       | HSPD1       |
| 200814_at   | 0.4                           | 1                             | proteasome (prosome, macropain) activatorsubunit 1 (PA28 alpha)                                              | PSME1       |
| 200818_at   | 0.5                           | 1.2                           | ATP synthase, H+ transporting, mitochondrial F1complex, O subunit (oligomycin sensitivity conferringprotein) | ATP5O       |
| 200842_s_at | 0.5                           | 0.6                           | glutamyl-prolyl-tRNA synthetase                                                                              | EPRS        |
| 200843_s_at | 0.3                           | 0.1                           | glutamyl-prolyl tRNA synthetase                                                                              | EPRS        |
| 200844_s_at | 0.7                           | 0.1                           | anti-oxidant protein 2 (non-selenium glutathione peroxidase, acidic calcium-independent phospholipase A2)    | KIAA0106    |
| 200848_at   | 0.9                           | 1.2                           | S-adenosylhomocysteine hydrolase-like 1                                                                      | AHCYL1      |
| 200853_at   | 0.8                           | 1.3                           | H2A histone family, member Z                                                                                 | H2AFZ       |
| 200863_s_at | 0.7                           | 0.4                           | RAB11A, member RAS oncogene family /FL=gb:NM_004663.1 gb:AF000231.1                                          | RAB11A      |
| 200876_s_at | 0.5                           | 3.1                           | proteasome (prosome, macropain) subunit, betatype, 1                                                         | PSMB1       |
| 200878_at   | 1.2                           | 0.5                           | endothelial PAS domain protein 1                                                                             | EPAS1       |
| 200881_s_at | 0.8                           | 0.7                           | heat shock protein, DNAJ-like 2                                                                              | HSJ2        |
| 200883_at   | 1.4                           | 1                             | ubiquinol-cytochrome c reductase core proteinII                                                              | UQCRC2      |
| 200900_s_at | 2.8                           | 1.4                           | mannose-6-phosphate receptor (cation dependent)                                                              | M6PR        |
| 200904_at   | 0.6                           | 1.6                           | HLA-E                                                                                                        | HLA-E       |
| 200910_at   | 0.3                           | 0.9                           | chaperonin containing TCP1, subunit 3 (gamma)                                                                | CCT3        |
| 200920_s_at | 0.6                           | 3.5                           | B-cell translocation gene 1, anti-proliferative                                                              | BTG1        |
| 200927_s_at | 0.4                           | 0.9                           | GTPase Rab14                                                                                                 | Rab14       |
| 200978_at   | 0.8                           | 1.8                           | malate dehydrogenase 1, NAD (soluble)                                                                        | MDH1        |
| 200993_at   | 1                             | 1.2                           | RAN binding protein 7                                                                                        | RANBP7      |
| 200996_at   | 0.5                           | 1.8                           | ARP3 (actin-related protein 3, yeast) homolog                                                                | ACTR3       |
| 201001_s_at | 1.2                           | 0.2                           | ubiquitin-conjugating enzyme E2 variant 1                                                                    | UBE2V1      |
| 201014_s_at | 1.4                           | 2                             | multifunctional polypeptide similar to SAICARsynthetase and AIR carboxylase                                  | ADE2H1      |
| 201027_s_at | 1.3                           | 0.5                           | translation initiation factor IF2                                                                            | IF2         |
| 201030_x_at | 0.6                           | 1                             | lactate dehydrogenase B                                                                                      | LDHB        |
| 201051_at   | 0.8                           | 0.7                           | putative human HLA class II associated protein I                                                             | PHAP1       |
| 201067_at   | 1                             | 0.3                           | proteasome (prosome, macropain) 26S subunit, ATPase, 2                                                       | PSMC2       |
| 201068_s_at | 1                             | 1                             | proteasome (prosome, macropain) 26S subunit,ATPase, 2                                                        | PSMC2       |
| 201110_s_at | -2.3                          | -1.9                          | thrombospondin 1                                                                                             | THBS1       |
| 201112_s_at | 1.1                           | 2.1                           | chromosome segregation 1 (yeast homolog)-like                                                                | CSE1L       |
| 201117_s_at | -1.9                          | -1.3                          | carboxypeptidase E precursor                                                                                 | CPE         |
| 201144_s_at | 1                             | 0.8                           | eukaryotic translation initiation factor 2,subunit 1 (alpha, 35kD )                                          | EIF2S1      |
| 201163_s_at | -2.2                          | -1.6                          | insulin-like growth factor binding protein 7                                                                 | IGFBP7      |
| 201176_s_at | 0.6                           | 2.5                           | archain                                                                                                      | ARCN1       |
| 201179_s_at | 0.5                           | 0.5                           | guanine nucleotide binding protein (G protein), alpha inhibiting activity polypeptide 3                      | GNAI1       |
| 201196_s_at | 0.8                           | 0.4                           | S-adenosylmethionine decarboxylase 1                                                                         | AMD2        |
| 201198_s_at | 1.2                           | 1                             | proteasome (prosome, macropain) 26S subunit, non-ATPase, 1                                                   | PSMD1       |
| 201202_at   | 0.5                           | 0.6                           | proliferating cell nuclear antigen                                                                           | PCNA        |
| 201214_s_at | 0.6                           | 1.4                           | protein phosphatase 1, regulatory subunit 7                                                                  | PPP1R7      |
| 201237_at   | 0.5                           | 0.2                           | capping protein (actin filament) muscle Z-line, alpha 2                                                      | CAPZA2      |
| 201241_at   | 0.5                           | 0.6                           | DEADH (Asp-Glu-Ala-AspHis) box polypeptide 1                                                                 | DDX1        |
| 201258_at   | 0.6                           | 2.4                           | ribosomal protein S16                                                                                        | RPS16       |

|             |      |      |                                                                                                                  |              |
|-------------|------|------|------------------------------------------------------------------------------------------------------------------|--------------|
| 201263_at   | 0.4  | 1    | threonyl-tRNA synthetase                                                                                         | TARS         |
| 201274_at   | 0.4  | 0.6  | proteasome (prosome, macropain) subunit, alphatype, 5                                                            | PSMA5        |
| 201291_s_at | 4.5  | 2.1  | topoisomerase (DNA) II alpha (170kD)                                                                             | TOP2A        |
| 201292_at   | 2    | 2.1  | topoisomerase (DNA) II alpha (170kD)                                                                             | TOP2A        |
| 201301_s_at | 0.4  | 0.5  | annexin A4                                                                                                       | ANXA4        |
| 201303_at   | 0.8  | 0.9  | KIAA0111 gene product                                                                                            | KIAA0111     |
| 201317_s_at | 0.7  | 0.9  | proteasome (prosome, macropain) subunit, alphatype, 2                                                            | PSMA2        |
| 201322_at   | 0.3  | 1    | ATP synthase, H+ transporting, mitochondrial F1complex, beta polypeptide                                         | ATP5B        |
| 201325_s_at | 0.4  | 2.1  | epithelial membrane protein 1                                                                                    | EMP1         |
| 201328_at   | 0.9  | 0.5  | v-ets avian erythroblastosis virus E26 oncogene homolog 2                                                        | ETS2         |
| 201330_at   | 0.4  | 0.8  | arginyl-tRNA synthetase                                                                                          | RARS         |
| 201358_s_at | -0.6 | -1.2 | coatomer protein complex, subunit beta                                                                           | COPB         |
| 201416_at   | -0.9 | -1.2 | SRY (sex determining region Y)-box 4                                                                             | SOX4         |
| 201441_at   | 0.4  | 0.5  | cytochrome c oxidase subunit VIb                                                                                 | COX6B        |
| 201444_s_at | 0.6  | 0.8  | ATPase, H+ transporting, lysosomal (vacuolarproton pump) membrane sector associated protein M8-9                 | APT6M8-9     |
| 201454_s_at | 0.3  | 1.4  | aminopeptidase puromycin sensitive                                                                               | NPEPPS       |
| 201457_x_at | 0.5  | 1.3  | kinetochore protein BUB3                                                                                         | BUB3         |
| 201462_at   | 0.5  | 1.7  | KIAA0193 gene product                                                                                            | KIAA0193     |
| 201477_s_at | 1    | 0.3  | ribonucleotide reductase M1 polypeptide                                                                          | RRM1         |
| 201487_at   | 0.9  | 0.6  | cathepsin C                                                                                                      | CTSC         |
| 201502_s_at | 0.4  | 0.2  | nuclear factor of kappa light polypeptide gene enhancer in B-cells inhibitor, alpha                              | NFKBIA       |
| 201506_at   | 1.2  | 1.3  | transforming growth factor, beta-induced, 68kD                                                                   | TGFBI        |
| 201532_at   | 0.8  | 1.8  | proteasome (prosome, macropain) subunit, alphatype, 3                                                            | PSMA3        |
| 201552_at   | 0.3  | 1.9  | lysosomal-associated membrane protein 1                                                                          | LAMP1        |
| 201577_at   | 1.2  | 1.2  | Homo sapiens non-metastatic cells 1, protein (NM23A) expressed in (NME1), mRNA. / non-metastatic cells 1 protein | NME1         |
| 201593_s_at | 0.8  | 1.4  | uncharacterized hypothalamus protein HT010                                                                       | HT010        |
| 201606_s_at | 1.3  | 0.7  | nuclear phosphoprotein similar to S. cerevisiae PWP1                                                             | PWP1         |
| 201608_s_at | 0.6  | 0.1  | nuclear phosphoprotein similar to S. cerevisiae PWP1                                                             | PWP1         |
| 201659_s_at | 0.9  | 1.1  | ADP-ribosylation factor-like 1                                                                                   | ARL1         |
| 201663_s_at | 1.4  | 0.2  | chromosome-associated polypeptide C                                                                              | CAP-C        |
| 201664_at   | 0.8  | 0.5  | hypothetical protein                                                                                             | DKFZp434F205 |
| 201672_s_at | 0.5  | 0.3  | ubiquitin specific protease 14 (tRNA-guaninetransglycosylase)                                                    | USP14        |
| 201694_s_at | -0.8 | -1.3 | early growth response 1                                                                                          | EGR1         |
| 201725_at   | 1.4  | 1.1  | D123 gene product                                                                                                | D123         |
| 201756_at   | 0.6  | 0.1  | replication protein A2 (32kD)                                                                                    | RPA2         |
| 201758_at   | 0.3  | 0.9  | tumor susceptibility gene 101                                                                                    | TSG101       |
| 201779_s_at | 0.8  | 1.2  | RING zinc finger protein RZF                                                                                     | RNF13        |
| 201811_x_at | -1   | -1.2 | SH3-domain binding protein 5 (BTK-associated)                                                                    | SH3BP5       |
| 201827_at   | 0.7  | 0.9  | PRO2451                                                                                                          | SMARCD2      |
| 201831_s_at | 3.1  | 4.4  | vesicle docking protein p115                                                                                     | P115         |
| 201842_s_at | 0.2  | 0.4  | EGF-containing fibulin-like extracellular matrix protein 1                                                       | EFEMP1       |
| 201859_at   | -1.6 | -1.1 | proteoglycan 1, secretory granule                                                                                | PRG1         |
| 201890_at   | 1.1  | 0.7  | ribonucleotide reductase M2 polypeptide                                                                          | RRM2         |
| 201897_s_at | 1.1  | 1.6  | CDC28 protein kinase 1                                                                                           | CKS1         |
| 201903_at   | 0.8  | 0.8  | ubiquinol-cytochrome c reductase core protein I                                                                  | UQCRC1       |
| 201906_s_at | 0.4  | 0.1  | HYA22 protein                                                                                                    | HYA22        |
| 201912_s_at | 0.4  | 0.1  | G1 to S phase transition 1                                                                                       | GSPT1        |
| 201927_s_at | 0.5  | 4.2  | plakophilin 4                                                                                                    | PKP4         |
| 201931_at   | 0.8  | 1.9  | electron transfer flavoprotein, alphapolypeptide                                                                 | ETF1A        |
| 201946_s_at | 1.2  | 2.6  | chaperonin containing TCP1, subunit 2 (beta)                                                                     | CCT2         |
| 201947_s_at | 0.9  | 0.3  | chaperonin containing TCP1, subunit 2 (beta)                                                                     | CCT2         |
| 201970_s_at | 1.7  | 2.9  | nuclear autoantigenic sperm protein(histone-binding)                                                             | NASP         |
| 201975_at   | -0.7 | -1   | restin (Reed-Steinberg cell-expressedintermediate filament-associated protein)                                   | RSN          |
| 201999_s_at | 0.6  | 0.9  | t-complex-associated-testis-expressed 1-like 1                                                                   | TCTEL1       |
| 202028_s_at | -0.6 | -1.4 | ribosomal protein L38                                                                                            | RPL38        |
| 202040_s_at | 0.5  | 0.1  | retinoblastoma-binding protein 2                                                                                 | RBBP2        |
| 202042_at   | 0.6  | 0.4  | histidyl tRNA synthetase                                                                                         | HARS         |
| 202080_s_at | 0.6  | 0.3  | KIAA1042 protein                                                                                                 | KIAA1042     |
| 202084_s_at | 0.8  | 0.7  | SEC14 (S. cerevisiae)-like 1                                                                                     | SEC14L1      |
| 202107_s_at | 0.8  | 0.4  | minichromosome maintenance deficient (S.cerevisiae) 2 (mitotin)                                                  | MCM2         |
| 202113_s_at | 0.9  | 3.1  | sorting nexin 2                                                                                                  | SNX2         |
| 202149_at   | -0.7 | -1.2 | enhancer of filamentation 1 (cas-like docking; Crk-associated substrate related)                                 | HEF1         |
| 202154_x_at | 0.2  | 0.8  | tubulin, beta, 4                                                                                                 | TUBB4        |
| 202157_s_at | -1   | -1.2 | RNA-binding protein BRUNOL3                                                                                      | BRUNOL3      |
| 202168_at   | 0.3  | 0.9  | TATA box binding protein (TBP)-associatedfactor, RNA polymerase II, G, 32kD                                      | TAF2G        |
| 202174_s_at | 0.4  | 0.5  | pericentriolar material 1                                                                                        | PCM1         |
| 202199_s_at | -0.7 | -0.6 | SFRS protein kinase 1                                                                                            | SRPK1        |
| 202202_s_at | -0.9 | -1.4 | laminin, alpha 4 precursor                                                                                       | LAMA4        |

|             |      |      |                                                                                                |               |
|-------------|------|------|------------------------------------------------------------------------------------------------|---------------|
| 202206_at   | 0.5  | 1.6  | ADP-ribosylation factor-like 7                                                                 | ARL7          |
| 202209_at   | 1.1  | 0.8  | Lsm3 protein                                                                                   | LSM3          |
| 202225_at   | 0.4  | 0.9  | v-crk avian sarcoma virus CT10 oncogene homolog                                                | CRK           |
| 202243_s_at | 0.8  | 2.4  | proteasome (prosome, macropain) subunit, betatype, 4                                           | PSMB4         |
| 202263_at   | 0.4  | 0.3  | cytochrome b5 reductase 1 (B5R.1)                                                              | LOC51706      |
| 202299_s_at | 0.3  | 0.1  | hepatitis B virus x-interacting protein                                                        | XIP           |
| 202300_at   | 0.5  | 1.9  | hepatitis B virus x-interacting protein                                                        | XIP           |
| 202347_s_at | 0.5  | 0.7  | E2 ubiquitin-conjugating enzyme                                                                | LIG           |
| 202352_s_at | 0.6  | 0.5  | proteasome (prosome, macropain) 26S subunit, non-ATPase, 12                                    | PSMD12        |
| 202378_s_at | 0.9  | 1.7  | leptin receptor gene-related protein                                                           | HSOBRGRP      |
| 202403_s_at | -1.3 | -2   | collagen, type I, alpha 2                                                                      | COL1A2        |
| 202436_s_at | -2.2 | -1.2 | cytochrome P450, subfamily I (dioxin-inducible), polypeptide 1 (glaucoma 3, primary infantile) | CYP1B1        |
| 202437_s_at | -3.5 | -2.7 | cytochrome P450, subfamily I (dioxin-inducible), polypeptide 1                                 | CYP1B1        |
| 202441_at   | 0.2  | 0.2  | similar to Caenorhabditis elegans protein C42C1.9                                              | KEO4          |
| 202446_s_at | 0.5  | 0.7  | phospholipid scramblase 1                                                                      | PLSCR1        |
| 202487_s_at | 1    | 0.7  | purine-rich element binding protein B                                                          | PURB          |
| 202499_s_at | -0.8 | -1   | solute carrier family 2 (facilitated glucosetransporter), member 3                             | SLC2A3        |
| 202503_s_at | 0.9  | 0.5  | KIAA0101 gene product                                                                          | KIAA0101      |
| 202546_at   | 1    | 3.2  | vesicle-associated membrane protein 8                                                          | VAMP8         |
| 202548_s_at | 0.4  | 0.7  | PAK-interacting exchange factor beta                                                           | P85SPR        |
| 202552_s_at | -0.8 | -1.3 | cysteine-rich motor neuron 1                                                                   | CRIM1         |
| 202554_s_at | 0.6  | 1.3  | glutathione S-transferase M3 (brain)                                                           | GSTM3         |
| 202572_s_at | -1.1 | -1.2 | KIAA0964 protein                                                                               | KIAA0964      |
| 202589_at   | 1    | 0.4  | thymidylate synthetase                                                                         | TYMS          |
| 202591_s_at | 0.6  | 1.2  | single-stranded DNA-binding protein                                                            | SSBP          |
| 202594_at   | 0.4  | 0.5  | MY047 protein                                                                                  | MY047         |
| 202596_at   | 1    | 0.2  | endosulfine alpha                                                                              | ENSA          |
| 202655_at   | 0.5  | 0.2  | arginine-rich protein                                                                          | ARMET         |
| 202659_at   | 0.6  | 0.9  | proteasome (prosome, macropain) subunit, betatype, 10                                          | PSMB10        |
| 202686_s_at | -0.8 | -1.6 | AXL receptor tyrosine kinase isoform 1precursor                                                | AXL           |
| 202687_s_at | 0.6  | 1    | Apo-2 ligand                                                                                   | TNFSF10       |
| 202688_at   | 0.4  | 2.7  | tumor necrosis factor (ligand) superfamily, member 10                                          | TNFSF10       |
| 202697_at   | 0.8  | 0.6  | cleavage and polyadenylation specific factor 5,25 kD subunit                                   | CPSF5         |
| 202705_at   | 1.7  | 0.6  | cyclin B2                                                                                      | CCNB2         |
| 202706_s_at | 0.5  | 0.3  | UMP synthase                                                                                   | UMPS          |
| 202712_s_at | 1    | 0.8  | ubiquitous mitochondrial creatine kinaseprecursor                                              | CKMT1         |
| 202729_s_at | -0.8 | -1.1 | latent transforming growth factor beta bindingprotein 1 precursor                              | LTBP1         |
| 202737_s_at | 0.5  | 0.4  | U6 snRNA-associated Sm-like protein                                                            | LSM4          |
| 202746_at   | -1.2 | -0.8 | integral membrane protein 2A                                                                   | ITM2A         |
| 202753_at   | 0.5  | 1    | KIAA0107 gene product                                                                          | KIAA0107      |
| 202794_at   | 0.7  | 0.5  | inositol polyphosphate-1-phosphatase                                                           | INPP1         |
| 202852_s_at | 0.4  | 1.4  | hypothetical protein FLJ11506                                                                  | FLJ11506      |
| 202854_at   | 0.5  | 0.2  | hypoxanthine phosphoribosyltransferase 1                                                       | HPRT1         |
| 202859_x_at | 0.6  | 0.3  | interleukin 8                                                                                  | IL8           |
| 202876_s_at | -0.8 | -0.9 | pre-B-cell leukemia transcription factor 2                                                     | PBX2          |
| 202899_s_at | 0.9  | 1.7  | splicing factor, arginineserine-rich 3                                                         | SFRS3         |
| 202900_s_at | 0.9  | 0.8  | nucleoporin 88kD                                                                               | NUP88         |
| 202908_at   | -1.1 | -1.2 | Wolfram syndrome protein                                                                       | WFS1          |
| 202911_at   | 0.6  | 0.7  | mutS (E. coli) homolog 6                                                                       | MSH6          |
| 202923_s_at | 0.7  | 0.1  | glutamate-cysteine ligase                                                                      | GCLC          |
| 202936_s_at | -1.1 | -0.9 | transcription factor SOX9                                                                      | SOX9          |
| 202941_at   | 1    | 0.1  | NADH dehydrogenase (ubiquinone) flavoprotein 2(24kD)                                           | NDUFV2        |
| 202990_at   | 0.9  | 0.6  | phosphorylase, glycogen; liver (Hers disease, glycogen storage disease type VI)                | PYGL          |
| 203039_s_at | 1.1  | 0.3  | NADH dehydrogenase (ubiquinone) Fe-S protein 1(75kD) (NADH-coenzyme Q reductase)               | NDUFS1        |
| 203074_at   | 0.8  | 0.7  | annexin VIII                                                                                   | ANXA8         |
| 203098_at   | 0.4  | 0.2  | hypothetical protein                                                                           | DKFZp586C1622 |
| 203103_s_at | 1.1  | 1.6  | nuclear matrix protein NMP200 related tosplicing factor PRP19                                  | NMP200        |
| 203105_s_at | 1.4  | 0.5  | dynamamin 1-like protein, isoform 1                                                            | DNM1L         |
| 203126_at   | 0.8  | 1.1  | inositol(myo)-1(or 4)-monophosphatase 2                                                        | IMPA2         |
| 203202_at   | 0.5  | 0.6  | HIV-1 rev binding protein 2                                                                    | HRB2          |
| 203203_s_at | 1.1  | 1.4  | HIV-1 rev binding protein 2                                                                    | HRB2          |
| 203213_at   | 1.7  | 1.5  | cell division cycle 2, G1 to S and G2 to M                                                     | CDC2          |
| 203247_s_at | 0.4  | 0.4  | zinc finger protein 24 (KOX 17)                                                                | ZNF24         |
| 203255_at   | -0.3 | -1.2 | vitiligo-associated protein VIT-1                                                              | VIT1          |
| 203259_s_at | 0.3  | 0.8  | Similar to CGI-130 protein                                                                     | LOC51020      |
| 203336_s_at | 0.8  | 0.3  | integrin cytoplasmic domain-associated protein 1                                               | ICAP-1A       |
| 203341_at   | 0.4  | 0.6  | CCAAT-box-binding transcription factor                                                         | CBF2          |
| 203345_s_at | 1.3  | 1.7  | putative DNA binding protein                                                                   | M96           |
| 203358_s_at | 0.8  | 0.2  | enhancer of zeste (Drosophila) homolog 2                                                       | EZH2          |
| 203359_s_at | 0.6  | 0.1  | c-myc binding protein                                                                          | MYCBP         |

|             |      |      |                                                                                                                      |               |
|-------------|------|------|----------------------------------------------------------------------------------------------------------------------|---------------|
| 203362_s_at | 1    | 0.8  | MAD2-like 1                                                                                                          | MAD2L1        |
| 203405_at   | 0.9  | 0.9  | Down syndrome critical region protein 2                                                                              | DSCR2         |
| 203428_s_at | 0.8  | 1.2  | Homo sapiens mRNA for CIA, complete cds.                                                                             | DKFZP547E2110 |
| 203455_s_at | -0.6 | -0.9 | spermidinespermine N1-acetyltransferase                                                                              | SAT           |
| 203460_s_at | 0.5  | 0.7  | presenilin 1 isoform I-463                                                                                           | PSEN1         |
| 203517_at   | 0.3  | 1    | metaxin 2                                                                                                            | MTX2          |
| 203554_x_at | 1.1  | 1    | pituitary tumor-transforming protein 1                                                                               | PTTG1         |
| 203560_at   | 0.8  | 1.2  | gamma-glutamyl hydrolase (conjugase,folypolygammaglutamyl hydrolase) precursor                                       | GGH           |
| 203583_at   | 0.5  | 0.3  | DKFZP564G0222 protein                                                                                                | DKFZP564G0222 |
| 203603_s_at | -2.2 | -1.6 | zinc finger homeobox 1B                                                                                              | ZFHX1B        |
| 203621_at   | 0.7  | 0.9  | NADH dehydrogenase (ubiquinone) 1 betasubcomplex, 5 (16kD, SGDH)                                                     | NDUFB5        |
| 203637_s_at | -0.4 | -1   | midline 1                                                                                                            | MID1          |
| 203697_at   | -3.9 | -3.2 | Fritz                                                                                                                | FRZB          |
| 203698_s_at | -2.8 | -2.7 | frizzled-related protein                                                                                             | FRZB          |
| 203706_s_at | -1.1 | -1.5 | frizzled 7                                                                                                           | FZD7          |
| 203711_s_at | 1.1  | 0.6  | 3-hydroxyisobutyryl-Coenzyme A hydrolase                                                                             | HIBCH         |
| 203712_at   | 1.1  | 0.9  | KIAA0020 gene product                                                                                                | KIAA0020      |
| 203721_s_at | 0.5  | 0.9  | CGI-48 protein                                                                                                       | LOC51096      |
| 203755_at   | 1.6  | 0.5  | budding uninhibited by benzimidazoles 1 (yeasthomolog), beta                                                         | BUB1B         |
| 203764_at   | 1.9  | 1.4  | KIAA0008 gene product                                                                                                | KIAA0008      |
| 203798_s_at | 1.2  | 0.9  | visinin-like 1                                                                                                       | VSNL1         |
| 203800_s_at | 0.5  | 0.7  | hypothetical protein LOC63931                                                                                        | LOC63931      |
| 203856_at   | 1    | 0.4  | vaccinia related kinase 1                                                                                            | VRK1          |
| 203903_s_at | -1.2 | -1.8 | hephaestin                                                                                                           | HEPH          |
| 203962_s_at | 1    | 0.2  | nebullette                                                                                                           | NEBL          |
| 203964_at   | 0.6  | 0.3  | N-myc and STAT interactor                                                                                            | NMI           |
| 204026_s_at | 1.1  | 0.9  | ZW10 interactor                                                                                                      | ZWINT         |
| 204033_at   | 0.8  | 0.4  | thyroid hormone receptor interactor 13                                                                               | TRIP13        |
| 204082_at   | 0.6  | 0.8  | pre-B-cell leukemia transcription factor 3                                                                           | PBX3          |
| 204112_s_at | 0.6  | 0.3  | histamine N-methyltransferase                                                                                        | HNMT          |
| 204119_s_at | 0.9  | 0.3  | adenosine kinase short form                                                                                          | ADK           |
| 204135_at   | -0.9 | -1   | downregulated in ovarian cancer 1                                                                                    | DOC1          |
| 204143_s_at | 0.4  | 1.1  | rTS beta protein                                                                                                     | HSRTSBETA     |
| 204146_at   | 1.1  | 0.9  | RAD51-interacting protein                                                                                            | PIR51         |
| 204151_x_at | 0.9  | 0.1  | aldo-keto reductase family 1, member C1(dihydrodiol dehydrogenase 1; 20-alpha(3-alpha)-hydroxysteroid dehydrogenase) | AKR1C1        |
| 204154_at   | -1.4 | -1.1 | cysteine dioxygenase, type I                                                                                         | CDO1          |
| 204159_at   | 0.6  | 0.8  | cyclin-dependent kinase inhibitor 2C (p18,inhibits CDK4)                                                             | CDKN2C        |
| 204162_at   | 2.9  | 1.9  | highly expressed in cancer, rich in leucineheptad repeats                                                            | HEC           |
| 204170_s_at | 1.1  | 0.7  | CDC28 protein kinase 2                                                                                               | CKS2          |
| 204197_s_at | -1.6 | -1.1 | runt-related transcription factor 3                                                                                  | RUNX3         |
| 204237_at   | -1.2 | -1   | CED-6 protein                                                                                                        | CED-6         |
| 204271_s_at | -2   | -1.3 | endothelin receptor                                                                                                  |               |
| 204273_at   | -2.8 | -1.3 | endothelin receptor type B, isoform 1                                                                                | EDNRB         |
| 204279_at   | 1.4  | 0.4  | proteasome (prosome, macropain) subunit, betatype, 9 (large multifunctional protease 2)                              | PSMB9         |
| 204285_s_at | 0.7  | 1.3  | phorbol-12-myristate-13-acetate-induced protein 1                                                                    | PMAIP1        |
| 204286_s_at | 0.3  | 0.6  | phorbol-12-myristate-13-acetate-induced protein1                                                                     | PMAIP1        |
| 204305_at   | 0.9  | 0.9  | mitochondrial intermediate peptidase                                                                                 | MIPEP         |
| 204362_at   | 0.8  | 1.1  | SKAP55 homologue                                                                                                     | SKAP-HOM      |
| 204364_s_at | 0.8  | 2.3  | hypothetical protein FLJ13110                                                                                        | FLJ13110      |
| 204373_s_at | 0.8  | 0.6  | KIAA0480 gene product                                                                                                | KIAA0480      |
| 204400_at   | -0.6 | -1   | signal transduction protein (SH3 containing)                                                                         | EFS2          |
| 204409_s_at | 0.5  | 1.1  | Homo sapiens, clone MGC:12282, mRNA, complete cds.                                                                   | EIF1AY        |
| 204444_at   | 1.2  | 0.9  | kinesin-like 1                                                                                                       | KNSL1         |
| 204451_at   | -0.7 | -1.3 | frizzled 1                                                                                                           | FZD1          |
| 204464_s_at | -1.1 | -1.4 | endothelin receptor type A                                                                                           | EDNRA         |
| 204508_s_at | 0.7  | 2.2  | hypothetical protein FLJ20151                                                                                        | FLJ20151      |
| 204529_s_at | -1.8 | -2.2 | KIAA0808 gene product                                                                                                | KIAA0808      |
| 204531_s_at | 1    | 0.1  | breast cancer 1, early onset                                                                                         | BRCA1         |
| 204548_at   | 0.5  | 0.9  | steroidogenic acute regulatory protein                                                                               | STAR          |
| 204602_at   | -1.3 | -1.9 | dickkopf (Xenopus laevis) homolog 1                                                                                  | DKK1          |
| 204620_s_at | -2   | -1.4 | chondroitin sulfate proteoglycan 2 (versican)                                                                        | CSPG2         |
| 204636_at   | 0.4  | 2.2  | collagen, type XVII, alpha 1                                                                                         | COL17A1       |
| 204682_at   | -0.9 | -1   | latent transforming growth factor beta bindingprotein 2                                                              | LTBP2         |
| 204712_at   | -6.6 | -3.8 | Wnt inhibitory factor-1                                                                                              | WIF-1         |
| 204725_s_at | 1    | 0.5  | NCK adaptor protein 1                                                                                                | NCK1          |
| 204766_s_at | 3.7  | 3.3  | nudix (nucleoside diphosphate linked moietyX)-type motif 1                                                           | NUDT1         |
| 204772_s_at | 1    | 0.3  | transcription termination factor, RNA polymerasel                                                                    | TTF1          |
| 204777_s_at | -2   | -1.2 | T-cell differentiation protein MAL, isoform a                                                                        | MAL           |

|             |      |      |                                                                                                                |                |
|-------------|------|------|----------------------------------------------------------------------------------------------------------------|----------------|
| 204780_s_at | 0.9  | 0.4  | tumor necrosis factor receptor superfamily, member 6                                                           | TNFRSF6        |
| 204793_at   | -0.9 | -1.5 | KIAA0443 gene product                                                                                          | KIAA0443       |
| 204808_s_at | 0.6  | 1.4  | transmembrane protein 5                                                                                        | TMEM5          |
| 204820_s_at | 0.7  | 0.1  | butyrophilin, subfamily 3, member A3                                                                           | BTN3A3         |
| 204822_at   | 1.1  | 1.1  | TTK protein kinase                                                                                             | TTK            |
| 204825_at   | 2    | 0.2  | KIAA0175 gene product                                                                                          | KIAA0175       |
| 204836_at   | -2   | -1.9 | glycine dehydrogenase (decarboxylating; glycinedecarboxylase, glycine cleavage system protein P)               | GLDC           |
| 204869_at   | -1.6 | -1.7 | proprotein convertase subtilisin/kexin type 2                                                                  | PCSK2          |
| 204872_at   | -0.7 | -1   | BCE-1 protein                                                                                                  | BCE-1          |
| 204905_s_at | 0.3  | 0.5  | eukaryotic translation elongation factor 1 epsilon 1                                                           | EEF1E1         |
| 204948_s_at | -1.1 | -1.9 | folliculin isoform FST344 precursor                                                                            | FST            |
| 204962_s_at | 1.5  | 1.7  | centromere protein A                                                                                           | CENPA          |
| 204976_s_at | 0.7  | 0.2  | Alport syndrome, mental retardation, midface hypoplasia and elliptocytosis chromosomal region gene 1           | AMMECR1        |
| 205001_s_at | 1.3  | 1.6  | dead box, Y isoform                                                                                            | DBY            |
| 205029_s_at | 0.7  | 0.6  | fatty acid binding protein 7, brain                                                                            | FABP7          |
| 205053_at   | 0.9  | 1    | primase, polypeptide 1 (49kD)                                                                                  | PRIM1          |
| 205061_s_at | 0.7  | 0.6  | polymyositis/scleroderma autoantigen 1 (75kD)                                                                  | PMSCL1         |
| 205064_at   | -1.5 | -1.3 | small proline-rich protein 1B (cornifin)                                                                       | SPRR1B         |
| 205066_s_at | -1.6 | -2.1 | ectonucleotide pyrophosphatase/phosphodiesterase 1                                                             | ENPP1          |
| 205078_at   | 0.5  | 0.8  | phosphatidylinositol glycan, class F                                                                           | PIGF           |
| 205170_at   | -1.5 | -1.4 | signal transducer and activator of transcription 2, 113kD                                                      | STAT2          |
| 205176_s_at | 0.4  | 0.6  | integrin beta 3 binding protein (beta3-endonexin)                                                              | ITGB3BP        |
| 205194_at   | -0.9 | -1.1 | phosphoserine phosphatase                                                                                      | PSPH           |
| 205246_at   | 0.8  | 2.5  | peroxisome biogenesis factor 13                                                                                | PEX13          |
| 205328_at   | -1.5 | -0.7 | claudin 10                                                                                                     | CLDN10         |
| 205337_at   | -2.5 | -1.2 | dopachrome tautomerase (dopachrome delta-isomerase, tyrosine-related protein 2)                                | DCT            |
| 205345_at   | 1    | 2.5  | BRCA1 associated RING domain 1                                                                                 | BARD1          |
| 205372_at   | -0.6 | -1.3 | pleiomorphic adenoma gene 1                                                                                    | PLAG1          |
| 205379_at   | 0.2  | 0.5  | carbonyl reductase 3                                                                                           | CBR3           |
| 205383_s_at | -1.1 | -1.5 | zinc finger protein 288                                                                                        | ZNF288         |
| 205404_at   | -2.1 | -2.3 | hydroxysteroid (11-beta) dehydrogenase 1                                                                       | HSD11B1        |
| 205412_at   | 0.8  | 0.4  | acetyl-Coenzyme A acetyltransferase 1 precursor                                                                | ACAT1          |
| 205415_s_at | 0.3  | 1.6  | Machado-Joseph disease (spinocerebellar ataxia 3, olivopontocerebellar ataxia 3, autosomal dominant, ataxin 3) | MJD            |
| 205428_s_at | -0.6 | -1   | calbindin 2, full length protein isoform                                                                       | CALB2          |
| 205434_s_at | -0.8 | -1.6 | KIAA1048 protein                                                                                               | KIAA1048       |
| 205440_s_at | 1.2  | 0.6  | neuropeptide Y receptor Y1                                                                                     | NPY1R          |
| 205443_at   | 0.7  | 1.2  | small nuclear RNA activating complex, polypeptide 1, 43kD                                                      | SNAPC1         |
| 205480_s_at | 0.7  | 1.6  | UDP-glucose pyrophosphorylase 2                                                                                | UGP2           |
| 205489_at   | -1   | -1.5 | crystallin, mu                                                                                                 | CRYM           |
| 205590_at   | -1.3 | -2.6 | RAS guanyl releasing protein 1                                                                                 | RASGRP1        |
| 205601_s_at | -0.8 | -0.9 | homeo box B5                                                                                                   | HOXB5          |
| 205659_at   | -1.6 | -2.5 | histone deacetylase 7B                                                                                         | HDAC7B-PENDING |
| 205690_s_at | 0.3  | 0.9  | maternal G10 transcript                                                                                        | G10            |
| 205694_at   | -2.3 | -1.5 | tyrosinase-related protein 1                                                                                   | TYRP1          |
| 205711_x_at | 0.5  | 2.3  | ATP synthase, H+ transporting, mitochondrial F1 complex, gamma polypeptide 1                                   | ATP5C1         |
| 205752_s_at | -1   | -1.2 | glutathione S-transferase M5                                                                                   | GSTM5          |
| 205794_s_at | -1.8 | -1.6 | neuro-oncological ventral antigen 1, isoform 1                                                                 | NOVA1          |
| 205848_at   | -2.1 | -2.6 | growth arrest-specific 2                                                                                       | GAS2           |
| 205891_at   | 0.5  | 1.5  | adenosine A2b receptor                                                                                         | ADORA2B        |
| 205909_at   | 1.4  | 0.6  | polymerase (DNA directed), epsilon 2                                                                           | POLE2          |
| 206002_at   | -2.1 | -2.3 | G protein-coupled receptor 64                                                                                  | GPR64          |
| 206140_at   | -5   | -4.7 | LIM homeobox protein 2                                                                                         | LHX2           |
| 206144_at   | -1.1 | -1   | BAI1-associated protein 1                                                                                      | BAIAP1         |
| 206276_at   | 2    | 0.5  | lymphocyte antigen 6 complex, locus D                                                                          | E48            |
| 206295_at   | 0.6  | 0.6  | interleukin 18                                                                                                 | IL-18          |
| 206302_s_at | -0.5 | -1.1 | nudix (nucleoside diphosphate linked moietyX)-type motif 4                                                     | NUDT4          |
| 206314_at   | -0.8 | -1.2 | zinc finger protein                                                                                            | ZFP            |
| 206323_x_at | -1.2 | -1.2 | oligophrenin 1, Rho-GTPase activating protein                                                                  | OPHN1          |
| 206364_at   | 1.3  | 0.5  | KIAA0042 gene product                                                                                          | KIAA0042       |
| 206377_at   | -1.3 | -1.2 | forkhead box F2                                                                                                | FOXF2          |
| 206400_at   | 0.3  | 1.8  | galectin 7                                                                                                     | LGALS7         |
| 206404_at   | -1   | -1.7 | fibroblast growth factor 9 (glia-activating factor)                                                            | FGF9           |
| 206421_s_at | 1.8  | 4    | serine (or cysteine) proteinase inhibitor, clade B (ovalbumin), member 7                                       | SERPINB7       |
| 206426_at   | -1   | -1.5 | melan-A                                                                                                        | MLANA          |
| 206461_x_at | 0.4  | 0.7  | metallothionein 1H                                                                                             | MT1H           |
| 206465_at   | -2.3 | -3.5 | very long-chain acyl-CoA synthetase; lipidosin                                                                 | KIAA0631       |

|             |      |      |                                                                                                             |                |
|-------------|------|------|-------------------------------------------------------------------------------------------------------------|----------------|
| 206542_s_at | 0.7  | 1    | SWISNF related, matrix associated, actin dependent regulator of chromatin, subfamily a, member 2            | SMARCA2        |
| 206562_s_at | 1.2  | 1.5  | casein kinase 1, alpha 1                                                                                    | CSNK1A1        |
| 206632_s_at | 0.7  | 0.1  | phorbolin (similar to apolipoprotein B mRNA editing protein)                                                | DJ742C19.2     |
| 206642_at   | 0.7  | 1.4  | desmoglein 1 preproprotein                                                                                  | DSG1           |
| 206734_at   | -0.9 | -1.1 | jerky (mouse) homolog-like                                                                                  | JRKL           |
| 206766_at   | -1.1 | -1.4 | integrin alpha 10 subunit                                                                                   | ITGA10         |
| 206953_s_at | -1   | -1.6 | latrophilin                                                                                                 | KIAA0786       |
| 207016_s_at | -2.2 | -2   | RALDH2-T                                                                                                    | RALDH2         |
| 207076_s_at | 0.6  | 1.6  | argininosuccinate synthetase                                                                                | ASS            |
| 207165_at   | 2.1  | 1.6  | hyaluronan-mediated motility receptor (RHAMM)                                                               | HMMR           |
| 207173_x_at | -1.8 | -2.4 | OB-cadherin-1                                                                                               | osf-4          |
| 207175_at   | -1.9 | -2.3 | adipose most abundant gene transcript 1                                                                     | APM1           |
| 207184_at   | -1.1 | -1.5 | solute carrier family 6 (neurotransmitter transporter, GABA), member 13                                     | SLC6A13        |
| 207291_at   | 1.1  | 0.8  | transmembrane gamma-carboxyglutamic acid protein4                                                           | TMG4           |
| 207332_s_at | 0.6  | 0.6  | transferrin receptor (p90, CD71)                                                                            | TFRC           |
| 207345_at   | -2   | -2.3 | folliculin isoform FST317 precursor                                                                         | FST            |
| 207369_at   | -1.4 | -1.8 | bombesin-like receptor 3                                                                                    | BRS3           |
| 207431_s_at | 0.7  | 0.2  | degenerative spermatocyte                                                                                   | DEGS           |
| 207573_x_at | 0.6  | 1    | ATP synthase, H+ transporting, mitochondrial F1F0, subunit g                                                | ATP5JG         |
| 207594_s_at | -1   | -1.7 | synaptojanin 1                                                                                              | SYNJ1          |
| 207654_x_at | 0.6  | 0.6  | down-regulator of transcription 1                                                                           | DR1            |
| 207749_s_at | 0.2  | 0.9  | protein phosphatase 2 (formerly 2A), regulatory subunit B (PR 72), alpha isoform and (PR 130), beta isoform | PPP2R3         |
| 207981_s_at | -0.9 | -2.4 | estrogen-related receptor gamma                                                                             | ESRRG          |
| 208029_s_at | 0.3  | 1.4  | putative integral membrane transporter                                                                      | LC27           |
| 208066_s_at | 0.4  | 0.4  | general transcription factor IIB                                                                            | GTF2B          |
| 208079_s_at | 2    | 0.3  | serine/threonine kinase 6                                                                                   | STK6           |
| 208095_s_at | 1.8  | 1.2  | calcium/calmodulin-dependent protein kinase (CaMkinase) II gamma                                            | CAMK2G         |
| 208216_at   | -0.9 | -1.2 | distal-less homeobox 4                                                                                      | DLX4           |
| 208309_s_at | 1    | 1.4  | mucosa associated lymphoid tissue lymphoma translocation gene 1                                             | MALT1          |
| 208393_s_at | 0.6  | 0.6  | RAD50 (S. cerevisiae) homolog                                                                               | RAD50          |
| 208517_x_at | 0.7  | 1.3  | basic transcription factor 3                                                                                | BTF3           |
| 208581_x_at | 0.3  | 0.9  | metallothionein 1X                                                                                          | MT1X           |
| 208606_s_at | 0.7  | 3.6  | wingless-type MMTV integration site family, member 4                                                        | WNT4           |
| 208612_at   | 0.9  | 0.6  | ER-60 protease                                                                                              | GRP58          |
| 208626_s_at | -0.7 | -1.1 | Similar to membrane protein of cholinergic synaptic vesicles                                                | VATI           |
| 208636_at   | -0.7 | -1.1 | actinin, alpha 1                                                                                            | ACTN1          |
| 208650_s_at | -1.5 | -1.1 | CD24 antigen (small cell lung carcinoma cluster 4 antigen)                                                  | CD24           |
| 208662_s_at | 1    | 1.4  | tetratricopeptide repeat domain 3                                                                           | TTC3           |
| 208670_s_at | 0.8  | 1.4  | PNAS-26                                                                                                     | CRI1           |
| 208671_at   | 0.5  | 0.9  | Diff33 protein homolog                                                                                      | KIAA1253       |
| 208679_s_at | 0.4  | 2.2  | PNAS-139                                                                                                    | ARPC2          |
| 208680_at   | 0.5  | 0.9  | Human natural killer cell enhancing factor (NKEFA) mRNA, complete cds.                                      | NKEFA          |
| 208685_x_at | 0.2  | 1    | bromodomain-containing 2                                                                                    | BRD2           |
| 208687_x_at | 0.6  | 0.6  | constitutive heat shock protein 70                                                                          | HSC70          |
| 208689_s_at | 0.5  | 1.9  | ribophorin II                                                                                               | RPN2           |
| 208695_s_at | -0.5 | -1.1 | ribosomal protein L39                                                                                       | RPL39          |
| 208696_at   | 0.5  | 2.3  | PNAS-102                                                                                                    | CCT5           |
| 208708_x_at | 0.6  | 0.1  | hypothetical protein                                                                                        | DKFZp564N1916  |
| 208726_s_at | 0.6  | 0.8  | eukaryotic translation initiation factor 2, subunit 2 (beta, 38kD)                                          | EIF2S2         |
| 208734_x_at | 0.8  | 2.6  | GTP-binding protein                                                                                         | RAB2           |
| 208736_at   | 0.3  | 0.5  | p21-Arc                                                                                                     | ARPC3          |
| 208739_x_at | 0.8  | 0.7  | MIF2 suppressor                                                                                             | HSMT3          |
| 208743_s_at | 0.8  | 4.8  | tyrosine 3-monooxygenase/tryptophan 5-monooxygenase activation protein, beta polypeptide                    | YWHA8          |
| 208756_at   | 0.2  | 0.7  | TGF-beta receptor interacting protein 1                                                                     | EIF3S2         |
| 208758_at   | 0.8  | 0.9  | 5-aminoimidazole-4-carboxamide ribonucleotide transformylase                                                | ATIC           |
| 208761_s_at | 0.3  | 2.5  | SUMO-1                                                                                                      | UBL1           |
| 208771_s_at | 0.3  | 0.4  | leukotriene A4 hydrolase                                                                                    | LTA4H          |
| 208805_at   | 0.9  | 1    | proteasome (prosome, macropain) subunit, alpha type 6                                                       | PSMA6          |
| 208812_x_at | 0.6  | 0.4  | major histocompatibility complex, class I, C                                                                | HLA-C          |
| 208827_at   | 0.5  | 0.4  | Similar to proteasome (prosome, macropain) subunit, beta type 6                                             | PSMB6          |
| 208835_s_at | 1.1  | 0.9  | cisplatin resistance-associated overexpressed protein                                                       | LUC7A          |
| 208851_s_at | -0.7 | -1   | hypothetical protein                                                                                        | DKFZp761B15121 |
| 208864_s_at | 1    | 1    | thioredoxin                                                                                                 | TXN            |
| 208898_at   | 0.4  | 0.3  | vacuolar ATP synthase subunit D homolog                                                                     | VATD           |
| 208909_at   | 0.9  | 1    | ubiquinol-cytochrome c reductase, Rieske iron-sulfur polypeptide 1                                          | UQCRC1         |
| 208910_s_at | 0.8  | 4.1  | splicing factor                                                                                             | C1QBP          |
| 208940_at   | 0.5  | 1.2  | SELENOPHOSPHATE SYNTHETASE ; Human selenium donor protein                                                   | SPS            |

|             |      |      |                                                                                                                        |                |
|-------------|------|------|------------------------------------------------------------------------------------------------------------------------|----------------|
| 208974_x_at | 0.4  | 0.4  | karyopherin (importin) beta 1                                                                                          | KPNB1          |
| 208991_at   | 0.4  | 0.6  | signal transducer and activator of transcription 3 (acute-phase response factor)                                       | STAT3          |
| 208993_s_at | 1.7  | 0.3  | peptidyl-prolyl isomerase G (cyclophilin G)                                                                            | PP1G           |
| 209009_at   | 0.6  | 1.1  | Similar to esterase 10                                                                                                 | ESD            |
| 209024_s_at | 1.2  | 1    | NS1-associated protein 1                                                                                               | NSAP1          |
| 209040_s_at | 1.5  | 3.4  | proteasome subunit LMP7                                                                                                | LMP7           |
| 209042_s_at | 0.6  | 0.5  | Similar to ubiquitin-conjugating enzyme E2G 2(homologous to yeast UBC7)                                                | UBE2G2         |
| 209043_at   | 0.5  | 1.2  | bifunctional ATP sulfurylaseadenosine5-phosphosulfate kinase                                                           | PAPSS1         |
| 209059_s_at | 0.2  | 1.6  | hMBF1alpha                                                                                                             | EDF1           |
| 209104_s_at | 0.7  | 1.5  | likely homolog of yeast Nhp2, component of theHACA snoRNP; hypothetical protein FLJ20479                               | NOLA2          |
| 209118_s_at | -0.8 | -1.1 | alpha-tubulin                                                                                                          | TUBA3          |
| 209140_x_at | 1    | 2    | major histocompatibility complex                                                                                       | HLA-B39        |
| 209157_at   | 0.6  | 0.1  | Homo sapiens DNJ3CPR3 mRNA, complete cds.                                                                              | DNJ3CPR3       |
| 209161_at   | 0.9  | 2.4  | PRP4STKWD splicing factor                                                                                              | HPRP4P         |
| 209168_at   | -1.5 | -1.3 | glycoprotein M6B                                                                                                       | GPM6B          |
| 209170_s_at | -2.5 | -1.7 | glycoprotein M6B                                                                                                       | m6b1           |
| 209225_x_at | 0.2  | 0.2  | karyopherin (importin) beta 2                                                                                          | KPNB2          |
| 209228_x_at | 0.6  | 0.5  | Putative prostate cancer tumor suppressor                                                                              | N33            |
| 209242_at   | -0.9 | -1.2 | paternally expressed 3                                                                                                 | PEG3           |
| 209288_s_at | -1.4 | -0.9 | hypothetical protein                                                                                                   | DKFZp434A0530  |
| 209301_at   | 1.2  | 0.9  | carbonic anhydrase II                                                                                                  | CA2            |
| 209330_s_at | 1.3  | 0.9  | heterogeneous nuclear ribonucleoprotein D (hnRNPd)                                                                     | HNRPD          |
| 209335_at   | -0.8 | -0.8 | decorin                                                                                                                | DCN            |
| 209337_at   | 0.5  | 0.3  | lens epithelium-derived growth factor                                                                                  | PSIP1          |
| 209360_s_at | -2.3 | -1.4 | AML1b protein                                                                                                          | AML1           |
| 209369_at   | 0.6  | 0.8  | 1,2-cyclic-inositol-phosphate phosphodiesterase                                                                        | ANX3           |
| 209382_at   | 0.4  | 1.6  | RNA polymerase III subunit                                                                                             | RPC62          |
| 209392_at   | -2   | -1.7 | autotaxin                                                                                                              | ENPP2          |
| 209393_s_at | 0.9  | 2.6  | cap-binding protein 4EHP                                                                                               | EIF4EL3        |
| 209409_at   | -1.1 | -1.8 | growth factor receptor-bound protein 10                                                                                | KIAA0207       |
| 209421_at   | 0.7  | 1.3  | mutS (E. coli) homolog 2 (colon cancer, nonpolyposis type 1)                                                           | hMSH2          |
| 209435_s_at | -1.3 | -1   | Unknown (protein for MGC:3182)                                                                                         |                |
| 209448_at   | 0.6  | 0.4  | Tat-interacting protein (30kD)                                                                                         | TIP30          |
| 209459_s_at | -0.8 | -1.6 | Homo sapiens NPD009 mRNA, complete cds.                                                                                | NPD009         |
| 209481_at   | 0.4  | 0.7  | Homo sapiens HSNFRK (HSNFRK) mRNA, complete cds.                                                                       | HSNFRK         |
| 209512_at   | 1.1  | 2.5  | Similar to RIKEN cDNA 2610207116 gene                                                                                  |                |
| 209572_s_at | 0.8  | 0.4  | embryonic ectoderm development protein                                                                                 | EED            |
| 209579_s_at | 0.6  | 1    | methyl-CpG binding domain protein 4                                                                                    | MBD4           |
| 209583_s_at | -2.9 | -1.5 | brain my033 protein                                                                                                    | MOX2           |
| 209586_s_at | 0.5  | 0.3  | prune protein                                                                                                          | HTCD37         |
| 209608_s_at | 0.9  | 0.5  | acetyl-Coenzyme A acetyltransferase 2 (acetoacetyl Coenzyme A thiolase)                                                | ACAT2          |
| 209620_s_at | 1.9  | 0.5  | ABC transporter 7 protein                                                                                              | hABC7          |
| 209656_s_at | -1.1 | -2.4 | hypothetical protein                                                                                                   | DKFZp761J17121 |
| 209669_s_at | 0.8  | 1.3  | Similar to DKFZP564M2423 protein                                                                                       |                |
| 209694_at   | 0.4  | 0.8  | 6-pyruvoyltetrahydropterin synthase                                                                                    | PTS            |
| 209699_x_at | 1    | 0.2  | dihydrodiol dehydrogenase                                                                                              | AKR1C2         |
| 209714_s_at | 0.7  | 0.9  | cyclin-dependent kinase associated proteinphosphatase                                                                  | CDKN3          |
| 209732_at   | 0.7  | 1.4  | Similar to C-type (calcium dependent,carbohydrate-recognition domain) lectin, superfamilymember 2 (activation-induced) | CLECSF2        |
| 209771_x_at | -1.8 | -1.6 | CD24 antigen (small cell lung carcinoma cluster 4 antigen)                                                             | CD24           |
| 209773_s_at | 1.4  | 2.3  | ribonucleotide reductase M2 polypeptide                                                                                | RRM2           |
| 209790_s_at | 0.4  | 0.9  | caspace 6, apoptosis-related cysteine protease                                                                         | CASP6          |
| 209846_s_at | 1    | 2    | Similar to butyrophilin, subfamily 3, member A2                                                                        | BTN3A2         |
| 209849_s_at | 1.2  | 0.8  | Homo sapiens Rad51C (RAD51C) mRNA, complete cds.                                                                       | RAD51C         |
| 209861_s_at | 1.2  | 2.2  | eIF-2-associated p67 homolog                                                                                           | MNPEP          |
| 209891_at   | 0.4  | 0.1  | Homo sapiens AD024 mRNA, complete cds.                                                                                 | AD024          |
| 210053_at   | 0.3  | 0.4  | TATA box binding protein (TBP)-associated factor, RNA polymerase II, D, 100kD                                          | TAF2D          |
| 210059_s_at | 0.6  | 0.2  | mitogen-activated protein kinase 13                                                                                    | MAPK13         |
| 210093_s_at | 0.3  | 1.4  | Mago homolog                                                                                                           | MAGOH          |
| 210095_s_at | 0.6  | 2    | Human growth hormone-dependent insulin-like growth factor-binding protein mRNA, complete cds.                          | IGFBP1         |
| 210105_s_at | -1.6 | -1.8 | FYN oncogene related to SRC, FGR, YES                                                                                  | FYN            |
| 210115_at   | 2.8  | 1.3  | ribosomal protein L39                                                                                                  |                |
| 210136_at   | 0.9  | 1.8  | myelin basic protein                                                                                                   | MBP            |
| 210147_at   | -2.4 | -2.6 | mono-ADP-ribosyltransferase                                                                                            | htMART         |
| 210162_s_at | -1.1 | -1.7 | Human NF-ATc mRNA, complete cds.                                                                                       | NFATC1         |
| 210178_x_at | 0.6  | 1.3  | TLS-associated protein TASR                                                                                            | TASR1          |
| 210247_at   | -1.3 | -1   | synapsin II                                                                                                            | SYN2           |
| 210250_x_at | 0.4  | 0.3  | adenylosuccinate lyase                                                                                                 | ADSL           |

|             |      |      |                                                                     |               |
|-------------|------|------|---------------------------------------------------------------------|---------------|
| 210296_s_at | 0.6  | 0.9  | peroxisomal membrane protein 3 (35kD, Zellwegersyndrome)            | PXMP3         |
| 210335_at   | 0.8  | 0.3  | PAM COOH-terminal interactor protein 1                              | PCIP1         |
| 210365_at   | -1.8 | -1.5 | AML1a protein                                                       | AML1          |
| 210374_x_at | -1   | -0.8 | prostaglandin E receptor EP3 subtype 4 isoform                      | PTGER3        |
| 210426_x_at | 0.6  | 2.4  | Human orphan hormone nuclear receptor RORalpha1 mRNA, complete cds. | RORA          |
| 210479_s_at | 0.6  | 2.5  | Human transcription factor RZR-alpha mRNA, complete cds.            | RORA          |
| 210517_s_at | -1.1 | -1   | gravin                                                              | AKAP12        |
| 210544_s_at | 1.1  | 0.6  | aldehyde dehydrogenase 10 (fatty aldehydedehydrogenase)             | ALDH3A2       |
| 210567_s_at | 1.3  | 0.2  | Similar to S-phase kinase-associated protein 2 (p45)                | SKP2          |
| 210574_s_at | 0.5  | 0.6  | Homo sapiens NPD011 (NPD011) mRNA, complete cds.                    | NPD011        |
| 210653_s_at | 0.4  | 0.9  | branched chain alpha-keto acid dehydrogenaseE1-beta subunit         | BCKDHB        |
| 210759_s_at | 1.2  | 1.1  | prosomal protein P30-33K                                            | pros-30       |
| 210766_s_at | 0.7  | 0.9  | cellular apoptosis susceptibility protein                           | CSE1          |
| 210792_x_at | 2.4  | 0.6  | Siva-2                                                              | SIVA          |
| 210800_at   | -1.3 | -1.2 | Unknown (protein for MGC:12262)                                     | TIMM8A        |
| 210830_s_at | 0.9  | 1.7  | paraoxonase                                                         | PON2          |
| 210944_s_at | -0.9 | -1.4 | Similar to calpain 3, (p94)                                         | CAPN3         |
| 210946_at   | -1   | -1.3 | type-2 phosphatidic acid phosphatase alpha-2                        | PAP2-a2       |
| 210947_s_at | 0.6  | 0.6  | Human MSH3 gene, complete cds.                                      | MSH3          |
| 210986_s_at | -0.6 | -0.9 | tropomyosin isoform                                                 | TPM1          |
| 210993_s_at | 0.3  | 0.8  | mad-related protein MADR1                                           | MADR1         |
| 211015_s_at | 0.7  | 1.4  | heat shock protein 70                                               | hsp70         |
| 211071_s_at | -1.3 | -1   | ALL1-fused gene from chromosome 1q                                  |               |
| 211075_s_at | 1.1  | 1.8  | integrin associated protein                                         |               |
| 211276_at   | -1.3 | -2.4 | brain my048 protein                                                 |               |
| 211297_s_at | 1.5  | 2.3  | protein serinethreonine kinase                                      | CDK7          |
| 211340_s_at | -1   | -1.5 | MUC18 glycoprotein                                                  | MCAM          |
| 211368_s_at | 1.1  | 0.2  | Interleukin 1-beta converting enzyme isoform epsilon                | IL1BCE        |
| 211372_s_at | 0.5  | 0.8  | soluble type II interleukin-1 receptor                              | IL1R2         |
| 211445_x_at | -1.1 | -0.9 | Homo sapiens FKSG17 (FKSG17) mRNA, complete cds.                    | FKSG17        |
| 211454_x_at | -1.6 | -1.3 | Homo sapiens FKSG51 (FKSG51) mRNA, complete cds.                    | FKSG51        |
| 211466_at   | -1.2 | -1.1 | nuclear factor I B3                                                 | NFIB          |
| 211600_at   | -2.3 | -1.5 | glomerular epithelial protein 1                                     | GLEPP1        |
| 211623_s_at | 0.5  | 1.2  | Human casein kinase II beta subunit mRNA, complete cds.             | C5NK2B        |
| 211701_s_at | -1.3 | -1.3 | magphinin beta                                                      | TRO           |
| 211762_s_at | 1.1  | 0.7  | karyopherin alpha 2 (RAG cohort 1, importalpha 1)                   |               |
| 211936_at   | 1.1  | 0.6  | endoplasmic reticulum lumenal Ca2+ bindingprotein grp78             | HSPA5         |
| 211959_at   | -0.9 | -1.1 | Human insulin-like growth factor binding protein 5 (IGFBP5) mRNA    |               |
| 211968_s_at | 1.6  | 2.2  | heat shock 90kD protein 1, alpha                                    | HSPCA         |
| 211980_at   | -1.9 | -1.2 | collagen, type IV, alpha 1                                          | COL4A1        |
| 211984_at   | 0.5  | 0.6  | matrix Gla protein                                                  | MGP           |
| 211985_s_at | 1.1  | 0.8  | matrix Gla protein                                                  | MGP           |
| 212007_at   | 1    | 2.4  | UBX domain-containing 1                                             | UBXDC1        |
| 212012_at   | -2.1 | -1.9 | Melanoma associated gene                                            | D2S448        |
| 212030_at   | 0.5  | 0.8  | S164 protein                                                        | S164          |
| 212038_s_at | 0.7  | 1.9  | voltage-dependent anion channel 1                                   | VDAC1         |
| 212052_s_at | -0.4 | -1.2 | KIAA0676 protein                                                    | KIAA0676      |
| 212096_s_at | 0.7  | 1.1  | KIAA1288 protein                                                    | KIAA1288      |
| 212129_at   | 0.5  | 0.1  | hypothetical protein MGC5466                                        | MGC5466       |
| 212180_at   | 0.6  | 0.7  | Homo sapiens mRNA; cDNA DKFZp564E2222 (from clone DKFZp564E2222)    |               |
| 212190_at   | -1.8 | -2.5 | trinucleotide repeat containing 3                                   | TNRC3         |
| 212199_at   | 0.4  | 1.1  | Human putative ribosomal protein S1 mRNA                            |               |
| 212230_at   | -1.6 | -1.3 | Homo sapiens phosphatidic acid phosphatase type 2B (PPAP2B), mRNA   |               |
| 212233_at   | -1.6 | -1.3 | H.sapiens mRNA for 3UTR of unknown protein                          |               |
| 212247_at   | 0.6  | 0.6  | KIAA0225 protein                                                    | KIAA0225      |
| 212264_s_at | 0.5  | 0.9  | KIAA0261 protein                                                    | KIAA0261      |
| 212266_s_at | 0.7  | 1.2  | splicing factor, arginineserine-rich 5                              | SFRS5         |
| 212296_at   | 0.5  | 0.1  | 26S proteasome-associated pad1 homolog                              | POH1          |
| 212327_at   | 0.4  | 0.1  | KIAA1102 protein                                                    | KIAA1102      |
| 212330_at   | 0.4  | 0.6  | hypothetical protein FLJ13576                                       | FLJ13576      |
| 212337_at   | 0.4  | 0.7  | peptidylprolyl isomerase B (cyclophilin B)                          | PPIB          |
| 212353_at   | -1.9 | -1.3 | KIAA1077 protein                                                    | KIAA1077      |
| 212397_at   | 0.3  | 1.1  | hypothetical protein                                                | DKFZp434I0812 |
| 212419_at   | -1   | -2   | Homo sapiens mRNA; cDNA DKFZp564L0822 (from clone DKFZp564L0822)    |               |
| 212425_at   | -0.8 | -1.2 | secretory carrier membrane protein 1                                | SCAMP1        |
| 212428_at   | 0.7  | 0.8  | KIAA0368 protein                                                    | KIAA0368      |
| 212442_s_at | 0.5  | 1.2  | Homo sapiens cDNA: FLJ21238 fis, clone COL01115                     |               |
| 212450_at   | -0.7 | -1   | KIAA0256 protein                                                    | KIAA0256      |
| 212473_s_at | -0.9 | -1.5 | Homo sapiens cDNA: FLJ22463 fis, clone HRC10126                     |               |
| 212510_at   | 0.7  | 0.2  | KIAA0089 protein                                                    | KIAA0089      |



|             |      |      |                                                                                            |                |
|-------------|------|------|--------------------------------------------------------------------------------------------|----------------|
| 212544_at   | 0.6  | 1.9  | thyroid hormone receptor interactor 3                                                      | TRIP3          |
| 212591_at   | 0.7  | 0.8  | RBP1-like protein                                                                          | BCAA           |
| 212613_at   | 1.2  | 2.3  | butyrophilin, subfamily 3, member A2                                                       | BTN3A2         |
| 212621_at   | 0.4  | 0.7  | Homo sapiens mRNA for KIAA0286 gene, partial cds.                                          | KIAA0286       |
| 212626_x_at | 0.3  | 1.2  | heterogeneous nuclear ribonucleoprotein C (C1C2)                                           | HNRPC          |
| 212627_s_at | 0.6  | 0.3  | KIAA0116 protein                                                                           | KIAA0116       |
| 212749_s_at | 0.6  | 1.5  | DKFZP586C1620 protein                                                                      | DKFZP586C1620  |
| 212761_at   | -0.6 | -1.2 | transcription factor 7-like 2 (T-cell specific, HMG-box)                                   | TCF7L2         |
| 212766_s_at | 0.2  | 0.2  | Homo sapiens, Similar to hypothetical protein FLJ12484, clone MGC:3008, mRNA, complete     |                |
| 212768_s_at | -4.5 | -2   | differentially expressed in hematopoietic lineages                                         | GW112          |
| 212773_s_at | 0.4  | 0.4  | translocase of outer mitochondrial membrane 20 (yeast) homolog                             | KIAA0016       |
| 212865_s_at | -1.3 | -1.1 | collagen, type XIV, alpha 1 (undulin)                                                      | COL14A1        |
| 212915_at   | -2   | -2.6 | KIAA1095 protein                                                                           | KIAA1095       |
| 212916_at   | -0.4 | -1.1 | KIAA1111 protein                                                                           | KIAA1111       |
| 212918_at   | 0.5  | 0.3  | hypothetical protein FLJ22028                                                              | FLJ22028       |
| 212946_at   | -1.1 | -1.1 | KIAA0564 protein                                                                           | KIAA0564       |
| 212977_at   | 0.9  | 1.1  | G protein-coupled receptor                                                                 | RDC1           |
| 212980_at   | -0.5 | -1.7 | Homo sapiens mRNA; cDNA DKFZp586J101 (from clone DKFZp586J101)                             |                |
| 213026_at   | 0.8  | 1.4  | Apg12 (autophagy 12, S. cerevisiae)-like                                                   | APG12L         |
| 213080_x_at | -0.5 | -0.9 | ribosomal protein L5                                                                       | RPL5           |
| 213088_s_at | 0.9  | 0.6  | KIAA0974 protein                                                                           | KIAA0974       |
| 213097_s_at | 0.4  | 0.2  | zuotin related factor 1                                                                    | ZRF1           |
| 213106_at   | -1.3 | -1.5 | Homo sapiens clone 23664 and 23905 mRNA sequence                                           |                |
| 213137_s_at | 0.4  | 0.7  | protein tyrosine phosphatase, non-receptor type 2                                          | PTPN2          |
| 213169_at   | -0.9 | -1.3 | Homo sapiens clone TUA8 Cri-du-chat region mRNA                                            |                |
| 213183_s_at | -1.5 | -2.1 | cyclin-dependent kinase inhibitor 1C (p57, Kip2)                                           | CDKN1C         |
| 213212_x_at | -0.9 | -1.3 | golgin-67                                                                                  | KIAA0855       |
| 213241_at   | -2.2 | -1.5 | Homo sapiens clone 23785 mRNA sequence.                                                    |                |
| 213260_at   | -1   | -1.7 | forkhead box C1                                                                            | FOXC1          |
| 213266_at   | -0.5 | -1.3 | gamma tubulin ring complex protein (76p gene)                                              | 76P            |
| 213275_x_at | -1.4 | -1   | cathepsin B                                                                                | CTSB           |
| 213305_s_at | 1    | 3.8  | protein phosphatase 2A B56-gamma1                                                          | PP2A           |
| 213307_at   | -1.8 | -1.6 | cortactin SH3 domain-binding protein                                                       | KIAA1022       |
| 213326_at   | -1.1 | -1.4 | vesicle-associated membrane protein 1 (synaptobrevin 1)                                    | VAMP1          |
| 213327_s_at | 0.8  | 0.7  | ubiquitin specific protease 12                                                             | USP12          |
| 213350_at   | -0.7 | -1.8 | ribosomal protein S11                                                                      | RPS11          |
| 213366_x_at | 0.4  | 1.5  | ATP synthase, H+ transporting, mitochondrial F1 complex, gamma polypeptide 1               | ATP5C1         |
| 213379_at   | 1.1  | 0.2  | Homo sapiens clone 640 unknown mRNA, complete sequence.                                    | CL640          |
| 213413_at   | -1.4 | -1.6 | Homo sapiens cDNA FLJ13555 fis, clone PLACE1007677                                         |                |
| 213423_x_at | 0.5  | 0.1  | Putative prostate cancer tumor suppressor                                                  | N33            |
| 213427_at   | 0.9  | 0.2  | ribonuclease P, 40kD subunit                                                               | RPP40          |
| 213428_s_at | -0.7 | -1.1 | collagen, type VI, alpha 1                                                                 | COL6A1         |
| 213447_at   | -1   | -1   | imprinted in Prader-Willi syndrome                                                         | IPW            |
| 213454_at   | 0.6  | 0.6  | cortistatin                                                                                | CORT           |
| 213465_s_at | 0.9  | 1.1  | protein phosphatase 1, regulatory subunit 7                                                | PPP1R7         |
| 213476_x_at | 0.3  | 3.2  | tubulin, beta, 4                                                                           | TUBB4          |
| 213486_at   | -1   | -1.6 | hypothetical protein DKFZp761N09121                                                        | DKFZP761N09121 |
| 213496_at   | -1.9 | -1.3 | KIAA0455 gene product                                                                      | KIAA0455       |
| 213571_s_at | 0.5  | 0.1  | eukaryotic translation initiation factor 4E-like 3                                         | EIF4EL3        |
| 213574_s_at | 0.9  | 0.1  | karyopherin (importin) beta 1                                                              | KPNB1          |
| 213588_x_at | -0.4 | -1   | ribosomal protein L14                                                                      | RPL14          |
| 213622_at   | -1.5 | -1.6 | collagen, type IX, alpha 2                                                                 | COL9A2         |
| 213627_at   | -0.6 | -0.8 | hepatocellular carcinoma associated protein; breast cancer associated gene 1               | JCL-1          |
| 213649_at   | 1    | 1.6  | splicing factor, arginineserine-rich 7 (35kD)                                              | SFRS7          |
| 213653_at   | 1.2  | 0.8  | putative methyltransferase                                                                 | M6A            |
| 213655_at   | 0.5  | 0.4  | tyrosine 3-monooxygenasetryptophan 5-monooxygenase activation protein, epsilon polypeptide | YWHAE          |
| 213702_x_at | -0.6 | -0.9 | N-acylsphingosine amidohydrolase (acid ceramidase)                                         | ASAH           |
| 213729_at   | 1    | 1.1  | Huntingtin-interacting protein A                                                           | HYP A          |
| 213742_at   | -0.9 | -0.1 | Homo sapiens cDNA FLJ11680 fis, clone HEMBA1004820                                         |                |
| 213803_at   | 0.9  | 1.2  | karyopherin (importin) beta 1                                                              | KPNB1          |
| 213836_s_at | -1.1 | -2   | KIAA1001 protein                                                                           | KIAA1001       |
| 213880_at   | -1.6 | -2   | G protein-coupled receptor 49                                                              | GPR49          |
| 213883_s_at | -0.5 | -0.9 | glucose phosphate isomerase                                                                | GPI            |
| 213895_at   | 0.8  | 0.8  | epithelial membrane protein 1                                                              | EMP1           |
| 213900_at   | -0.8 | -1.1 | Friedreich ataxia region gene X123                                                         | X123           |
| 214001_x_at | -0.9 | -1.9 | ribosomal protein S10                                                                      | RPS10          |
| 214041_x_at | -1.6 | -2.5 | ribosomal protein L37a                                                                     | RPL37A         |
| 214045_at   | 0.8  | 1.1  | lipoic acid synthetase                                                                     | LAS            |
| 214086_s_at | 0.8  | 0.9  | ADP-ribosyltransferase (NAD+; poly (ADP-ribose) polymerase)-like 2                         | ADPRTL2        |

|             |      |      |                                                                                                 |               |
|-------------|------|------|-------------------------------------------------------------------------------------------------|---------------|
| 214152_at   | -0.6 | -1.2 | phosphatidylinositol glycan, class B                                                            | PIGB          |
| 214214_s_at | 0.2  | 0.3  | complement component 1, q subcomponent binding protein                                          | C1QBP         |
| 214414_x_at | -2.7 | -2.2 | hemoglobin, alpha 1                                                                             | HBA1          |
| 214459_x_at | 0.7  | 1.1  | Cw1 antigen                                                                                     | HLA-C         |
| 214499_s_at | 0.5  | 1.7  | Bcl-2-associated transcription factor shortform                                                 | KIAA0164      |
| 214501_s_at | 0.7  | 0.8  | histone macroH2A1.1                                                                             | H2AFY         |
| 214582_at   | -1.6 | -1.6 | 2,3-cyclic nucleotide 3 phosphodiesterase                                                       | CNP           |
| 214610_at   | -1.1 | -1.3 | cytochrome P450, subfamily XIB (steroid 11-beta-hydroxylase), polypeptide 1                     | CYP11B1       |
| 214710_s_at | 2.2  | 1.8  | cyclin B1                                                                                       | CCNB1         |
| 214734_at   | 0.5  | 1.5  | KIAA0624 protein                                                                                | KIAA0624      |
| 214741_at   | 1.2  | 3.4  | zinc finger protein 131 (clone pHZ-10)                                                          | ZNF131        |
| 214772_at   | -1.5 | -1.6 | G2 protein                                                                                      | G2            |
| 214798_at   | -0.9 | -1.3 | Homo sapiens cDNA: FLJ21771 fis, clone COLF7779                                                 |               |
| 214861_at   | -3.1 | -1.5 | gene amplified in squamous cell carcinoma 1; KIAA0780 protein                                   | KIAA0780      |
| 214866_at   | -0.9 | -1.3 | urokinase plasminogen activator receptor                                                        | PLAUR         |
| 214882_s_at | 0.7  | 0.8  | splicing factor, arginineserine-rich 2                                                          | SFRS2         |
| 214911_s_at | 0.6  | 1.3  | bromodomain-containing 2                                                                        | BRD2          |
| 214949_at   | 0.4  | 1.1  | Homo sapiens mRNA; cDNA DKFZp586L141 (from clone DKFZp586L141).                                 |               |
| 214951_at   | -0.2 | -2.5 | hypothetical protein                                                                            | DKFZp564M1916 |
| 214996_at   | -0.6 | -0.8 | Homo sapiens mRNA full length insert cDNA clone EUROIMAGE 362780.                               |               |
| 215067_x_at | -1.4 | -1   | Homo sapiens cDNA FLJ12333 fis, clone MAMMA1002198, highly similar to THIOREDOXIN PEROXIDASE 1  |               |
| 215091_s_at | 0.5  | 0.8  | general transcription factor IIIA                                                               | GTF3A         |
| 215148_s_at | -1.3 | -0.9 | amyloid beta (A4) precursor protein-binding, family A, member 3 (X11-like 2)                    | APBA3         |
| 215160_x_at | 0.4  | 0.8  | FSHD region gene 1                                                                              | FRG1          |
| 215171_s_at | 0.3  | 0.1  | translocase of inner mitochondrial membrane 17 (yeast) homolog A                                | TIM17         |
| 215204_at   | -1.4 | -1.1 | Homo sapiens cDNA FLJ14090 fis, clone MAMMA1000264                                              |               |
| 215227_x_at | 0.3  | 0.5  | acid phosphatase 1, soluble                                                                     | ACP1          |
| 215306_at   | -1.7 | -2.3 | Homo sapiens mRNA; cDNA DKFZp586N2020 (from clone DKFZp586N2020)                                |               |
| 215313_x_at | 0.9  | 0.9  | major histocompatibility complex, class I, A                                                    | HLA-A         |
| 215424_s_at | 1.3  | 1.5  | SKI-INTERACTING PROTEIN                                                                         | SNW1          |
| 215479_at   | -1.8 | -1.4 | Homo sapiens cDNA FLJ20780 fis, clone COL04256                                                  |               |
| 215516_at   | 0.7  | 2    | laminin, beta 4                                                                                 | LAMB4         |
| 215525_at   | -0.5 | -1.8 | Homo sapiens mRNA; cDNA DKFZp586A0423 (from clone DKFZp586A0423)                                |               |
| 215629_s_at | 0.6  | 0.4  | BCMS-upstream neighbor-like (BCMSUNL)                                                           | BCMSUNL       |
| 215695_s_at | -0.7 | -1.9 | glycogenin-2 delta                                                                              | glycogenin-2  |
| 215704_at   | -2.4 | -2   | filaggrin                                                                                       | FLG           |
| 215773_x_at | 0.6  | 0.2  | poly-(ADP-ribose) polymerase II                                                                 | PARP2         |
| 216034_at   | -1.5 | -1.9 | Homo sapiens immunoglobulin lambda gene locus DNA, clone:288A10                                 |               |
| 216061_x_at | -1   | -1.1 | platelet-derived growth factor beta polypeptide (simian sarcoma viral (v-sis) oncogene homolog) | PDGFB         |
| 216064_s_at | 0.8  | 0.8  | aspartylglucosaminidase                                                                         | AGA           |
| 216088_s_at | 0.6  | 5.2  | proteasome (prosome, macropain) subunit, alpha type, 7                                          | PSMA7         |
| 216194_s_at | 0.4  | 0.3  | cytoskeleton-associated protein 1                                                               | CKAP1         |
| 216246_at   | -1   | -1.8 | ribosomal protein S20                                                                           | RPS20         |
| 216274_s_at | 0.8  | 0.5  | signal peptidase complex (18kD)                                                                 | SPC18         |
| 216341_s_at | -1.7 | -1.4 | gonadotropin-releasing hormone receptor                                                         | GNRHR         |
| 216379_x_at | -1.8 | -1.6 | Homo sapiens CD24 signal transducer mRNA.                                                       |               |
| 216526_x_at | 0.8  | 0.7  | major histocompatibility complex, class I, C                                                    | HLA-C         |
| 216652_s_at | 0.7  | 0.5  | Homo sapiens mRNA; cDNA DKFZp434H0872 (from clone DKFZp434H0872).                               |               |
| 216977_x_at | 0.9  | 1.1  | U2 snRNP-specific A protein                                                                     | SNRPA1        |
| 216988_s_at | 0.6  | 1.4  | protein tyrosine phosphatase type IVA, member 2                                                 | PTP4A2        |
| 217427_s_at | 1.6  | 0.4  | TUP1 like enhancer of SPLIT gene 1                                                              | TUPLE1        |
| 217627_at   | -0.6 | -0.9 | ESTs, Weakly similar to S47072 finger protein HZF10, Krueppel-related (H.sapiens)               |               |
| 217717_s_at | 0.7  | 1.7  | GW128 protein                                                                                   | GW128         |
| 217722_s_at | 0.6  | 1.2  | mesenchymal stem cell protein DSC92                                                             | LOC51335      |
| 217747_s_at | 0.3  | 1    | ribosomal protein S9                                                                            | RPS9          |
| 217762_s_at | 0.8  | 0.2  | RAB31, member RAS oncogene family                                                               | RAB31         |
| 217764_s_at | 1    | 0.5  | small GTP-binding protein rab22b                                                                | RAB31         |
| 217772_s_at | 1.1  | 0.2  | mitochondrial carrier homolog 2                                                                 | MTCH2         |
| 217835_x_at | 0.6  | 1    | putative Rab5-interacting protein                                                               | LOC55969      |
| 217848_s_at | 0.4  | 0.7  | pyrophosphatase (inorganic)                                                                     | PP            |
| 217850_at   | 0.3  | 0.7  | putative nucleotide binding protein,estradiol-induced                                           | E2IG3         |
| 217871_s_at | 0.4  | 1.8  | macrophage migration inhibitory factor(glycosylation-inhibiting factor)                         | MIF           |
| 217897_at   | -1.4 | -1.6 | FXYP domain-containing ion transport regulator 6                                                | FXYP6         |
| 217898_at   | 0.6  | 0.3  | chromosome 11 hypothetical protein ORF3                                                         | LOC56851      |
| 217919_s_at | 1    | 0.2  | PTD007 protein                                                                                  | PTD007        |
| 217933_s_at | 0.4  | 1.7  | leucine aminopeptidase                                                                          | LOC51056      |
| 217955_at   | 0.7  | 1.5  | MIL1 protein                                                                                    | MIL1          |
| 217959_s_at | 0.9  | 2.3  | PTD009 protein                                                                                  | PTD009        |
| 217976_s_at | 0.2  | 0.2  | dynein light chain-A                                                                            | LOC51143      |

|             |      |      |                                                                                                    |          |
|-------------|------|------|----------------------------------------------------------------------------------------------------|----------|
| 217985_s_at | 0.8  | 2.1  | bromodomain adjacent to zinc finger domain, 1A                                                     | BAZ1A    |
| 217987_at   | 0.6  | 0.4  | hypothetical protein                                                                               | FLJ20752 |
| 217991_x_at | -1.1 | -0.7 | hypothetical protein FLJ10355                                                                      | FLJ10355 |
| 217995_at   | 0.7  | 1    | CGI-44 protein; sulfide dehydrogenase like(yeast)                                                  | CGI-44   |
| 218002_s_at | 0.3  | 0.1  | small inducible cytokine subfamily B(Cys-X-Cys), member 14 (BRAK)                                  | SCYB14   |
| 218009_s_at | 1.6  | 0.9  | protein regulator of cytokinesis 1                                                                 | PRC1     |
| 218011_at   | 0.6  | 0.8  | ubiquitin-like 5                                                                                   | UBL5     |
| 218020_s_at | -0.6 | -1   | hypothetical protein FLJ13222                                                                      | FLJ13222 |
| 218031_s_at | 0.4  | 0.9  | hypothetical protein PRO1635                                                                       | PRO1635  |
| 218039_at   | 1.5  | 0.5  | Homo sapiens clone HQ0310 PRO0310p1 (LOC51203), mRNA.                                              | LOC51203 |
| 218042_at   | 0.3  | 0.6  | COP9 complex subunit 4                                                                             | LOC51138 |
| 218049_s_at | 0.6  | 1.5  | L13 protein                                                                                        | L13      |
| 218088_s_at | 0.8  | 0.3  | Rag C protein                                                                                      | GTR2     |
| 218104_at   | 0.3  | 0.1  | hypothetical protein FLJ20287                                                                      | FLJ20287 |
| 218108_at   | 0.5  | 1.1  | hypothetical protein FLJ10483                                                                      | FLJ10483 |
| 218109_s_at | 0.7  | 0.2  | hypothetical protein FLJ14153                                                                      | FLJ14153 |
| 218118_s_at | 1.6  | 0.9  | translocase of inner mitochondrial membrane 23(yeast) homolog                                      | TIM23    |
| 218123_at   | 1.4  | 1.5  | Homo sapiens chromosome 21 open reading frame 59 (C21ORF59), mRNA. / hypothetical protein FLJ20467 | C21ORF59 |
| 218135_at   | 0.8  | 0.3  | CDA14                                                                                              | LOC51290 |
| 218140_x_at | 0.6  | 0.4  | APMCF1 protein                                                                                     | APMCF1   |
| 218160_at   | 0.4  | 0.4  | NADH dehydrogenase (ubiquinone) 1 alphasubcomplex, 8 (19kD, PGIV)                                  | NDUFA8   |
| 218163_at   | 0.4  | 0.3  | MCT-1 protein                                                                                      | MCT-1    |
| 218167_at   | 0.6  | 2.1  | hypothetical protein                                                                               | LOC51321 |
| 218185_s_at | 0.5  | 0.2  | hypothetical protein FLJ10511                                                                      | FLJ10511 |
| 218190_s_at | 0.4  | 0.7  | ubiquinol-cytochrome c reductase complex (7.2kD)                                                   | HSPC051  |
| 218211_s_at | -1.7 | -1.6 | hypothetical protein MGC2771                                                                       | MGC2771  |
| 218229_s_at | 0.2  | 1.6  | KIAA1513 protein                                                                                   | KIAA1513 |
| 218238_at   | 0.7  | 0.4  | GTP-binding protein                                                                                | NGB      |
| 218249_at   | 0.7  | 0.1  | hypothetical protein FLJ21952                                                                      | FLJ21952 |
| 218250_s_at | 0.5  | 0.4  | CCR4-NOT transcription complex, subunit 7                                                          | CNOT7    |
| 218252_at   | 1    | 0.6  | cytoskeleton associated protein 2                                                                  | CKAP2    |
| 218268_at   | 0.5  | 0.2  | hypothetical protein FLJ12085                                                                      | FLJ12085 |
| 218309_at   | -1.5 | -1.3 | hypothetical protein PRO1489                                                                       | PRO1489  |
| 218330_s_at | -0.8 | -1.7 | hypothetical protein FLJ10633                                                                      | FLJ10633 |
| 218333_at   | 0.5  | 0.3  | CGI-101 protein                                                                                    | LOC51009 |
| 218349_s_at | 1.1  | 2.3  | hypothetical protein FLJ10036                                                                      | FLJ10036 |
| 218373_at   | 0.4  | 0.9  | hypothetical protein FLJ13258 similar to fusedtoes                                                 | FLJ13258 |
| 218375_at   | 0.7  | 0.8  | hypothetical protein MGC3037                                                                       | MGC3037  |
| 218399_s_at | 0.5  | 0.7  | hypothetical protein FLJ20764                                                                      | FLJ20764 |
| 218415_at   | 0.4  | 0.1  | vacuolar protein sorting 33B (yeast homolog)                                                       | VPS33B   |
| 218447_at   | 0.6  | 0.4  | DC13 protein                                                                                       | DC13     |
| 218449_at   | 0.7  | 1.2  | hypothetical protein FLJ11200                                                                      | FLJ11200 |
| 218450_at   | 0.2  | 1.6  | heme-binding protein                                                                               | HEBP     |
| 218477_at   | 0.6  | 0.7  | PTD011 protein                                                                                     | PTD011   |
| 218502_s_at | -2   | -1.6 | trichorhinophalangeal syndrome I gene                                                              | TRPS1    |
| 218535_s_at | 0.1  | 0.4  | hypothetical protein FLJ11159                                                                      | FLJ11159 |
| 218542_at   | 2    | 2.2  | hypothetical protein FLJ10540                                                                      | FLJ10540 |
| 218557_at   | 0.9  | 1.6  | Nit protein 2                                                                                      | NIT2     |
| 218558_s_at | 1    | 0.7  | hypothetical protein                                                                               | PRED22   |
| 218561_s_at | 0.4  | 0.9  | CGI-203 protein                                                                                    | CGI-203  |
| 218574_s_at | -1.3 | -2.7 | LIM and cysteine-rich domains 1                                                                    | LMCD1    |
| 218585_s_at | 1.5  | 0.9  | L2DTL protein                                                                                      | L2DTL    |
| 218587_s_at | 0.5  | 0.4  | x 010 protein                                                                                      | MDS010   |
| 218605_at   | 0.5  | 1.4  | hypothetical protein FLJ23182                                                                      | FLJ23182 |
| 218622_at   | 1    | 1.6  | hypothetical protein MGC5585                                                                       | MGC5585  |
| 218637_at   | -0.9 | -1.1 | hypothetical protein IMPACT                                                                        | IMPACT   |
| 218662_s_at | 1.7  | 0.2  | chromosome condensation protein G                                                                  | HCAP-G   |
| 218663_at   | 3.9  | 3.6  | chromosome condensation protein G                                                                  | HCAP-G   |
| 218721_s_at | 0.7  | 0.7  | hypothetical protein FLJ20505                                                                      | FLJ20505 |
| 218728_s_at | 0.9  | 1.3  | HSPC163 protein                                                                                    | HSPC163  |
| 218751_s_at | 2.3  | 1.7  | hypothetical protein FLJ11071                                                                      | FLJ11071 |
| 218768_at   | 0.8  | 0.1  | nuclear pore complex protein                                                                       | NUP107   |
| 218771_at   | -0.8 | -1.1 | hypothetical protein FLJ10782                                                                      | FLJ10782 |
| 218784_s_at | 0.7  | 2.5  | hypothetical protein FLJ11101                                                                      | FLJ11101 |
| 218802_at   | 0.6  | 0.3  | hypothetical protein FLJ20647                                                                      | FLJ20647 |
| 218827_s_at | 0.3  | 0.3  | hypothetical protein FLJ10352                                                                      | FLJ10352 |
| 218852_at   | 1    | 0.6  | hypothetical protein FLJ20644                                                                      | FLJ20644 |
| 218856_at   | 0.3  | 0.3  | hypothetical protein                                                                               | LOC51323 |
| 218859_s_at | 1    | 0.9  | HDCMC28P protein                                                                                   | HDCMC28P |
| 218875_s_at | 0.5  | 0.9  | F-box only protein 5                                                                               | FBXO5    |

|             |      |      |                                                                                   |          |
|-------------|------|------|-----------------------------------------------------------------------------------|----------|
| 218883_s_at | 1.1  | 0.9  | hypothetical protein FLJ23468                                                     | FLJ23468 |
| 218898_at   | 0.8  | 0.6  | hypothetical protein FLJ22282                                                     | FLJ22282 |
| 218932_at   | 0.5  | 0.4  | hypothetical protein FLJ20729                                                     | FLJ20729 |
| 218947_s_at | 0.4  | 1.2  | hypothetical protein FLJ10486                                                     | FLJ10486 |
| 218974_at   | -2.2 | -1.4 | hypothetical protein FLJ10159                                                     | FLJ10159 |
| 218993_at   | 0.3  | 0.6  | hypothetical protein FLJ10581                                                     | FLJ10581 |
| 219031_s_at | 0.5  | 0.7  | hypothetical protein                                                              | HSPC031  |
| 219038_at   | 0.7  | 0.3  | hypothetical protein FLJ11565                                                     | FLJ11565 |
| 219043_s_at | 0.4  | 1.8  | hypothetical protein MGC3062                                                      | MGC3062  |
| 219087_at   | 1.9  | 2.2  | asporin (LRR class 1)                                                             | ASPN     |
| 219104_at   | 1.1  | 0.2  | C3HC4-like zinc finger protein                                                    | ZFP26    |
| 219147_s_at | 0.3  | 0.2  | hypothetical protein FLJ20559                                                     | FLJ20559 |
| 219148_at   | 1.7  | 1.1  | Homo sapiens PDZ-binding kinase; T-cell originated protein kinase (TOPK), mRNA.   | TOPK     |
| 219158_s_at | 0.3  | 1.2  | hypothetical protein FLJ13340                                                     | FLJ13340 |
| 219162_s_at | 0.3  | 0.6  | CGI-113 protein                                                                   | LOC51017 |
| 219212_at   | 1.1  | 1.1  | heat shock protein hsp70-related protein                                          | LOC51182 |
| 219258_at   | 0.8  | 0.4  | hypothetical protein FLJ20516                                                     | FLJ20516 |
| 219279_at   | 0.2  | 2.8  | hypothetical protein FLJ20220                                                     | FLJ20220 |
| 219304_s_at | -1.2 | -1.4 | spinal cord-derived growth factor-B                                               | SCDGF-B  |
| 219306_at   | 1.3  | 0.8  | kinesin-like protein 2                                                            | hklp2    |
| 219347_at   | 0.6  | 0.1  | hypothetical protein FLJ10956                                                     | FLJ10956 |
| 219449_s_at | 0.3  | 1.7  | hypothetical protein FLJ20533                                                     | FLJ20533 |
| 219493_at   | 1.3  | 0.9  | hypothetical protein FLJ22009                                                     | FLJ22009 |
| 219496_at   | 0.8  | 1.1  | hypothetical protein FLJ21870                                                     | FLJ21870 |
| 219553_at   | 0.7  | 0.5  | Homo sapiens NME7 (NME7), mRNA.                                                   | NME7     |
| 219555_s_at | 1.8  | 3.5  | uncharacterized bone marrow protein BM039                                         | BM039    |
| 219572_at   | -1.7 | -1.4 | hypothetical protein FLJ20761                                                     | FLJ20761 |
| 219645_at   | -1.3 | -1.6 | skeletal muscle calsequestrin 1                                                   | CASQ1    |
| 219732_at   | -1   | -1.4 | hypothetical protein FLJ20300                                                     | FLJ20300 |
| 219757_s_at | -1   | -0.1 | hypothetical protein FLJ20392                                                     | FLJ20392 |
| 219759_at   | 1.2  | 0.6  | aminopeptidase                                                                    | LOC64167 |
| 219787_s_at | 1    | 1.1  | hypothetical protein FLJ10461                                                     | FLJ10461 |
| 219795_at   | -1.1 | -2.1 | solute carrier family 6 (neurotransmitter transporter), member 14                 | SLC6A14  |
| 219905_at   | 0.9  | 2.5  | hypothetical protein PRO2801                                                      | PRO2801  |
| 219918_s_at | 1.4  | 1.3  | hypothetical protein FLJ10517                                                     | FLJ10517 |
| 219932_at   | 0.5  | 1    | very long-chain acyl-CoA synthetase homolog 1                                     | VLCS-H1  |
| 219951_s_at | -1.1 | -1.2 | hypothetical protein FLJ10600                                                     | FLJ10600 |
| 219979_s_at | 1    | 2.1  | hypothetical protein                                                              | HSPC138  |
| 219998_at   | 0.6  | 0.4  | HSPC159 protein                                                                   | HSPC159  |
| 220115_s_at | -1.7 | -1.2 | cadherin 10, type 2 (T2-cadherin)                                                 | CDH10    |
| 220175_s_at | 0.6  | 0.1  | hypothetical protein from clone 1659351                                           | LOC57397 |
| 220183_s_at | 2.4  | 3.7  | nudix (nucleoside diphosphate linked moietyX)-type motif 6                        | NUDT6    |
| 220193_at   | -3.6 | -1.3 | hypothetical protein FLJ22938                                                     | FLJ22938 |
| 220239_at   | 0.3  | 0.1  | SBB126 protein                                                                    | SBB126   |
| 220329_s_at | 1.1  | 0.5  | hypothetical protein FLJ20627                                                     | FLJ20627 |
| 220403_s_at | 0.8  | 0.5  | p53-regulated apoptosis-inducing protein 1                                        | P53AIP1  |
| 220494_s_at | 1    | 3.6  | lipopolysaccharide specific response-68 protein                                   | LSR68    |
| 220533_at   | -1.3 | -1.4 | hypothetical protein FLJ13385                                                     | FLJ13385 |
| 220625_s_at | -1.5 | -2.1 | Ets transcription factor ESE-2b                                                   | ELF5     |
| 220867_s_at | -1.2 | -1   | solute carrier family 24(sodiumpotassiumcalcium exchanger), member 2              | SLC24A2  |
| 220897_at   | -1.1 | -1.5 | hypothetical protein FLJ11556                                                     | FLJ11556 |
| 220925_at   | 0.8  | 1.4  | hypothetical protein FLJ21613 similar to ratcorneal wound healing related protein | FLJ21613 |
| 220941_s_at | 0.8  | 0.2  | hypothetical protein LOC54149                                                     | YG81     |
| 221263_s_at | 0.4  | 2.1  | hypothetical protein MGC3133                                                      | MGC3133  |
| 221381_s_at | 0.2  | 1.1  | mortality factor 4                                                                | MORF4    |
| 221437_s_at | 1.3  | 2.6  | mitochondrial ribosomal protein S15                                               | MRPS15   |
| 221452_s_at | 1.1  | 1    | hypothetical protein MGC1223                                                      | MGC1223  |
| 221464_at   | -1.7 | -2   | olfactory receptor, family 1, subfamily D, member 2                               | OR1D2    |
| 221504_s_at | 0.9  | 1.3  | Vacuolar proton pump subunit SFD alpha isoform                                    | LOC51606 |
| 221521_s_at | 0.6  | 0.2  | Homo sapiens, HSPC037 protein, clone MGC:673, mRNA, complete cds.                 | LOC51659 |
| 221524_s_at | 1.1  | 1.2  | Homo sapiens Rag D mRNA, complete cds.                                            | RAGD     |
| 221547_at   | 0.7  | 0.4  | pre-mRNA splicing factor similar to S.cerevisiae Prp18                            | PRP18    |
| 221580_s_at | 0.6  | 1    | Homo sapiens, clone MGC:5306, mRNA, complete cds.                                 | MGC5306  |
| 221622_s_at | 0.4  | 0.5  | Homo sapiens HT026 mRNA, complete cds.                                            | HT007    |
| 221702_s_at | 0.3  | 1    | BBP-like protein 2                                                                | BLP2     |
| 221748_s_at | -0.6 | -1.3 | tensin                                                                            | TNS      |
| 221766_s_at | 1    | 0.2  | hypothetical protein FLJ20037                                                     | FLJ20037 |
| 221776_s_at | 1.4  | 0.8  | bromodomain-containing 7                                                          | BRD7     |
| 221803_s_at | 0.2  | 0.7  | nuclear receptor binding factor-2                                                 | NRBF-2   |
| 221823_at   | 0.4  | 0.3  | Homo sapiens clone 23860 mRNA sequence                                            |          |
| 221829_s_at | 1    | 0.1  | karyopherin (importin) beta 2                                                     | KPNB2    |

|                  |      |      |                                                                                                                                    |               |
|------------------|------|------|------------------------------------------------------------------------------------------------------------------------------------|---------------|
| 221916_at        | -1.3 | -2   | hypothetical protein                                                                                                               | DKFZp434B0417 |
| 221943_x_at      | -0.8 | -1.6 | ribosomal protein L38                                                                                                              | RPL38         |
| 221974_at        | -0.8 | -1   | imprinted in Prader-Willi syndrome                                                                                                 | IPW           |
| 221986_s_at      | 1    | 2.5  | hypothetical protein FLJ20059                                                                                                      | FLJ20059      |
| 221989_at        | 0.5  | 1.1  | ribosomal protein L10                                                                                                              | RPL10         |
| 222037_at        | 1.2  | 3.4  | minichromosome maintenance deficient (S. cerevisiae) 4                                                                             | MCM4          |
| 222040_at        | 0.4  | 0.9  | heterogeneous nuclear ribonucleoprotein A1                                                                                         | HNRPA1        |
| 222077_s_at      | 1.1  | 0.6  | GTPase activating protein                                                                                                          | ID-GAP        |
| 222108_at        | -1   | -1.4 | Human BAC clone GS1-99H8                                                                                                           |               |
| 222113_s_at      | -1   | -1.3 | epidermal growth factor receptor substrate EPS15R                                                                                  | EPS15R        |
| 222231_s_at      | 0.3  | 0.6  | hypothetical protein PRO1855                                                                                                       | PRO1855       |
| 222380_s_at      | -0.8 | -0.9 | ESTs                                                                                                                               |               |
| 266_s_at         | -1.9 | -1.5 | Homo sapiens CD24 signal transducer mRNA, complete cds and 3' region                                                               |               |
| 34031_i_at       | 0.6  | 1.6  | Human Krit1 mRNA, complete cds                                                                                                     |               |
| 36129_at         | -0.6 | -1.1 | Homo sapiens KIAA0397 mRNA, complete cds                                                                                           |               |
| 36552_at         | -0.6 | -1.3 | Homo sapiens mRNA; cDNA DKFZp586P0123 (from clone DKFZp586P0123)                                                                   |               |
| 36830_at         | 1.2  | 0.6  | Human mitochondrial intermediate peptidase precursor (MIPEP) mRNA, mitochondrial gene encoding mitochondrial protein, complete cds |               |
| 37547_at         | -0.9 | -2   | Human clone IMAGE-22181 unknown protein mRNA, partial cds                                                                          |               |
| 37577_at         | 0.9  | 0.9  | Human clone 23719 mRNA sequence                                                                                                    |               |
| 38241_at         | 1    | 3.2  | Human butyrophilin (BTF3) mRNA, complete cds                                                                                       |               |
| 39705_at         | -0.7 | -0.9 | Homo sapiens mRNA for KIAA0700 protein, partial cds                                                                                |               |
| 39891_at         | -1.1 | -1   | Cluster Incl. AI246730:qk40b01.x1 Homo sapiens cDNA, 3' end                                                                        |               |
| 40016_g_at       | -0.6 | -1.8 | Human mRNA for KIAA0303 gene, partial cds                                                                                          |               |
| 41387_r_at       | -0.9 | -0.9 | Human mRNA for KIAA0346 gene, partial cds                                                                                          |               |
| 44702_at         | -1   | -1.3 |                                                                                                                                    |               |
| 44783_s_at       | -0.9 | -1.3 |                                                                                                                                    |               |
| 45749_at         | -1   | -1.3 |                                                                                                                                    |               |
| 47550_at         | -0.8 | -0.9 |                                                                                                                                    |               |
| 47571_at         | -0.7 | -1.1 |                                                                                                                                    |               |
| 48031_r_at       | -1.5 | -1.7 |                                                                                                                                    |               |
| 48808_at         | 0.8  | 1.5  |                                                                                                                                    |               |
| 49327_at         | -0.9 | -1.1 |                                                                                                                                    |               |
| 49878_at         | -1.1 | -0.8 |                                                                                                                                    |               |
| 51158_at         | -0.9 | -1.2 |                                                                                                                                    |               |
| 51774_s_at       | -0.9 | -0.8 |                                                                                                                                    |               |
| 52285_f_at       | 0.5  | 0.2  |                                                                                                                                    |               |
| 54632_at         | -0.4 | -1   |                                                                                                                                    |               |
| 56256_at         | -0.5 | -1.5 |                                                                                                                                    |               |
| 57739_at         | -0.6 | -1.2 |                                                                                                                                    |               |
| 58780_s_at       | -1.2 | -1.6 |                                                                                                                                    |               |
| 58900_at         | -0.9 | -1   |                                                                                                                                    |               |
| 60471_at         | -1   | -1.1 |                                                                                                                                    |               |
| 60528_at         | -0.7 | -1.2 |                                                                                                                                    |               |
| 65635_at         | -0.5 | -1.1 |                                                                                                                                    |               |
| AFFX-hum_alu_at  | -0.6 | -1.1 | Human Alu-Sq subfamily consensus sequence.                                                                                         | Alu-Sq        |
| AFFX-M27830_M_at | -0.6 | -1.1 | Human 28S ribosomal RNA gene, complete cds.                                                                                        | 28S rRNA      |

List of the entire genes that are differentially expressed in either  $\alpha 6^+/\text{MHCI}^+$  cells or  $\alpha 6^+/\text{MHCI}^-$  cells and are consistently upregulated or down regulated in both arrays. “-” sign indicates that the gene is upregulated in  $\alpha 6^+/\text{MHCI}^-$  cells. The numbers that show the difference in the level of gene expression are in log2 scale.
