# Supplementary material for: Transcriptional profiling of putative human epithelial stem cells
Source: PubMed Central journal article supplement (PMC2536675; doi:10.1186/1471-2164-9-359), 2008-07-30
Supplement: 1471-2164-9-359-S3.pdf [file 1471-2164-9-359-S3.pdf]

**The Genes upregulated in human hair follicle bulge cells  
and in human alpha 6+/MHCI- cells**

|             |      |      |                                                                                    |        |
|-------------|------|------|------------------------------------------------------------------------------------|--------|
| 214774_x_at |      | -1.5 | trinucleotide repeat containing 9                                                  | TNRC9  |
| 217996_at   | -1   |      | pleckstrin homology-like domain, family A, member 1                                | PHLDA1 |
| 204712_at   | -6.6 | -3.8 | Wnt inhibitory factor-1                                                            | WIF-1  |
| 221127_s_at |      | -1.6 | regulated in glioma                                                                | RIG    |
| 214247_s_at |      | -1   | regulated in glioma                                                                | RIG    |
| 200762_at   | -1.9 | -1.9 | dihydropyrimidinase-like 2                                                         | DPYSL2 |
| 209167_at   | -2   |      | glycoprotein M6B                                                                   | GPM6B  |
| 209168_at   | -1.5 | -1.3 | glycoprotein M6B                                                                   | GPM6B  |
| 209169_at   | -1.9 |      | glycoprotein M6B                                                                   | GPM6B  |
| 209170_s_at | -2.5 | -1.7 | glycoprotein M6B                                                                   | m6b1   |
| 201431_s_at | -1.4 |      | dihydropyrimidinase-like 3                                                         | DPYSL3 |
| 204451_at   | -0.7 | -1.3 | frizzled (Drosophila) homolog 1                                                    | FZD1   |
| 210162_s_at | -1.1 | -1.7 | NF-ATc mRNA                                                                        | NFATC1 |
| 207345_at   | -2   | -2.3 | follistatin, transcript variant FST317                                             | FST    |
| 204948_s_at | -1.1 | -1.9 | follistatin, transcript variant FST344                                             | FST    |
|             |      |      | dopachrome tautomerase (dopachrome delta-isomerase,<br>tyrosine-related protein 2) | DCT    |
| 205338_s_at | -2.2 |      | dopachrome tautomerase (dopachrome delta-isomerase,<br>tyrosine-related protein 2) | DCT    |
| 205337_at   | -2.5 | -1.2 | dopachrome tautomerase (dopachrome delta-isomerase, tyro                           | DCT    |
| 216512_s_at | -1.1 |      | dopachrome tautomerase (dopachrome delta-isomerase, tyro                           | DCT    |

**The Genes upregulated in human hair follicle bulge cells  
but down regulated in human alpha 6+/MHCI- cells**

|             |  |     |                                     |       |
|-------------|--|-----|-------------------------------------|-------|
| 202196_s_at |  | 2.5 | dickkopf (Xenopus laevis) homolog 3 | DKK3  |
| 204734_at   |  | 1.2 | keratin 15                          | KRT15 |

**The Genes downregulated in human hair follicle bulge  
cells and in human alpha 6+/MHCI- cells**

|             |     |     |                                                     |       |
|-------------|-----|-----|-----------------------------------------------------|-------|
| 203213_at   | 1.7 | 1.5 | cell division cycle 2, G1 to S and G2 to M          | CDC2  |
| 203214_x_at | 1.4 |     | cell division cycle 2, G1 to S and G2 to M          | CDC2  |
| 210559_s_at | 1.2 |     | CDC2 delta T                                        | CDC2  |
| 218009_s_at | 1.6 | 0.9 | protein regulator of cytokinesis 1                  | PRC1  |
| 209773_s_at | 1.4 | 2.3 | ribonucleotide reductase M2 polypeptide             | RRM2  |
| 201890_at   | 1.1 | 0.7 | ribonucleotide reductase M2 polypeptide             | RRM2  |
| 204026_s_at | 1.1 | 0.9 | ZW10 interactor                                     | ZWINT |
| 211762_s_at | 1.1 | 0.7 | karyopherin alpha 2 (RAG cohort 1, importinalpha 1) |       |
| 204767_s_at | 1.1 |     | flap structure-specific endonuclease 1              | FEN1  |
| 201291_s_at | 4.5 | 2.1 | topoisomerase (DNA) II alpha (170kD)                | TOP2A |
| 201292_at   | 2   | 2.1 | topoisomerase (DNA) II alpha (170kD)                | TOP2A |
| 202589_at   | 1   | 0.4 | thymidylate synthetase                              | TYMS  |
| 201453_x_at |     | 1.2 | Ras homolog enriched in brain 2                     | RHEB2 |

**The Genes that are downregulated in human hair follicle  
bulge cells but upregulated in human alpha 6+/MHCI-  
cells**

|             |      |      |                                                            |         |
|-------------|------|------|------------------------------------------------------------|---------|
| 206935_at   |      | -1.8 | protocadherin 8                                            | PCDH8   |
| 209884_s_at | -1.5 |      | sodium bicarbonate cotransporter 3                         | SLC4A7  |
| 37892_at    |      | -3.7 | alpha-1 type XI collagen                                   | COL11A1 |
| 211340_s_at | -1   | -1.5 | MUC18 glycoprotein mRNA                                    | MCAM    |
| 204682_at   | -0.9 | -1   | latent transforming growth factor beta binding protein 2   | LTBP2   |
| 204273_at   | -2.8 | -1.3 | endothelin receptor type B                                 | EDNRB   |
| 208650_s_at | -1.5 | -1.1 | CD24 antigen (small cell lung carcinoma cluster 4 antigen) | CD24    |
| 209771_x_at | -1.8 | -1.6 | CD24 antigen (small cell lung carcinoma cluster 4 antigen) | CD24    |
| 266_s_at    | -1.9 | -1.5 | CD24 signal transducer                                     |         |
| 208651_x_at | -1.8 |      | signal transducer CD24                                     | CD24    |
| 216379_x_at | -1.8 | -1.6 | CD24 signal transducer                                     |         |

List of the genes that are differentially expressed in  $\alpha6^+$ /MHCII<sup>+</sup> cells vs.  $\alpha6^+$ /MHCII<sup>-</sup> cells and also expressed in human hair follicle SCs (HHFSC). “-“sign indicates that the gene is upregulated in  $\alpha6^+$ /MHCII<sup>-</sup> cells. The numbers that show the difference in the level of gene expression are in log2 scale.
