# Supplementary material for: Transcriptional profiling of putative human epithelial stem cells
Source: PubMed Central journal article supplement (PMC2536675; doi:10.1186/1471-2164-9-359), 2008-07-30
Supplement: 1471-2164-9-359-S4.pdf [file 1471-2164-9-359-S4.pdf]

**Genes that are upregulated in mouse keratinocyte SCs and in human alpha 6+/MHCI-cells**

|             |      |      |                                                                                                             |         |
|-------------|------|------|-------------------------------------------------------------------------------------------------------------|---------|
| 206140_at   | -5   | -4.7 | LIM homeobox protein 2                                                                                      | LHX2    |
| 213730_x_at |      | -1   | transcription factor 3 (E2A immunoglobulin enhancer binding factors E12E47)                                 | TCF3    |
| 209153_s_at |      | -1.3 | transcription factor 3 (E2A immunoglobulin enhancer binding factors E12E47)                                 | TCF3    |
| 221016_s_at | -1.5 |      | HMG-box transcription factor TCF-3                                                                          | TCF3    |
| 204712_at   | -6.6 | -3.8 | Wnt inhibitory factor-1                                                                                     | WIF-1   |
| 218502_s_at | -2   | -1.6 | trichorhinophalangeal syndrome I gene                                                                       | TRPS1   |
| 221234_s_at | -1.1 |      | BTB and CNC homology 1, basic leucine zipper transcription factor 2                                         | BACH2   |
| 212865_s_at | -1.3 | -1.1 | collagen, type XIV, alpha 1 (undulin)                                                                       | COL14A1 |
| 202729_s_at | -0.8 | -1.1 | latent transforming growth factor beta binding protein 1                                                    | LTBP1   |
| 201431_s_at | -1.4 |      | dihydropyrimidinase-like 3                                                                                  | DSLY3   |
| 213880_at   | -1.6 | -2   | G protein-coupled receptor 49                                                                               | GPR49   |
| 209291_at   |      | -1   | inhibitor of DNA binding 4, dominant negative helix-loop-helix protein                                      | ID4     |
| 205066_s_at | -1.6 | -2.1 | ectonucleotide pyrophosphatasephosphodiesterase 1                                                           | ENPP1   |
| 203184_at   | -1   |      | fibrillin 2 (congenital contractural arachnodactyly)                                                        | FBN2    |
| 220048_at   | P    |      | ectodysplasin 1, anhidrotic receptor                                                                        | EDAR    |
| 213260_at   | -1   | -1.7 | forkhead box C1                                                                                             | FOXO1   |
| 201426_s_at | -1.7 |      | vimentin                                                                                                    | VIM     |
| 206028_s_at | -1.5 |      | c-mer proto-oncogene tyrosine kinase                                                                        | MERTK   |
| 205489_at   | -1   | -1.5 | crystallin, mu                                                                                              | CRYM    |
| 213436_at   | -1.4 |      | cannabinoid receptor 1 (brain)                                                                              | CNR1    |
| 200832_s_at | -2   |      | Scd mRNA for stearoyl-CoA desaturase                                                                        | Scd     |
| 205338_s_at | -2.2 |      | dopachrome tautomerase (dopachrome delta-isomerase, tyrosine-related protein 2)                             | DCT     |
| 205337_at   | -2.5 | -1.2 | dopachrome tautomerase (dopachrome delta-isomerase, tyrosine-related protein 2)                             | DCT     |
| 216512_s_at | -1.1 |      | dopachrome tautomerase (dopachrome delta-isomerase, tyrosine-related protein 2)                             | DCT     |
| 204273_at   | -2.8 | -1.3 | endothelin receptor type B                                                                                  | EDNRB   |
| 204121_at   | -1.2 |      | growth arrest and DNA-damage-inducible, gamma                                                               | GADD45G |
| 210365_at   | -1.8 | -1.5 | AML1 mRNA for AML1a protein (alternatively spliced product)                                                 | AML1    |
| 209360_s_at | -2.3 | -1.4 | AML1 mRNA for AML1b protein (alternatively spliced product)                                                 | AML1    |
| 205255_x_at | -1.1 |      | transcription factor 7 (T-cell specific, HMG-box)                                                           | TCF7    |
| 201117_s_at | -1.9 | -1.3 | carboxypeptidase E precursor                                                                                | CPE     |
| 209167_at   | -2   |      | glycoprotein M6B                                                                                            | GPM6B   |
| 209168_at   | -1.5 | -1.3 | glycoprotein M6B                                                                                            | GPM6B   |
| 209169_at   | -1.9 |      | glycoprotein M6B                                                                                            | GPM6B   |
| 209170_s_at | -2.5 | -1.7 | glycoprotein M6B                                                                                            | m6b1    |
| 211535_s_at |      | -2.5 | fibroblast growth factor receptor                                                                           | FGFR1   |
| 220792_at   | -1.5 |      | PR domain containing 5                                                                                      | PRDM5   |
| 210105_s_at | -1.6 | -1.8 | FYN oncogene related to SRC, FGR, YES                                                                       | FYN     |
| 201163_s_at | -2.2 | -1.6 | insulin-like growth factor binding protein 7                                                                | IGFBP7  |
| 210162_s_at | -1.1 | -1.7 | NF-ATc mRNA                                                                                                 | NFATC1  |
| 204736_s_at |      | -2.1 | melanoma-associated chondroitin sulfateproteoglycan 4                                                       | CSPG4   |
| 221731_x_at | -1.5 |      | chondroitin sulfate proteoglycan 2 (versican)                                                               | CSPG2   |
| 204620_s_at | -2   | -1.4 | chondroitin sulfate proteoglycan 2 (versican)                                                               | CSPG2   |
| 203945_at   |      | -1.4 | arginase, type II, nuclear gene encoding mitochondrial protein, mRNA                                        | ARG2    |
| 209583_s_at | -2.9 | -1.5 | brain my033 protein mRNA                                                                                    | MOX2    |
| 207147_at   |      | -1.8 | distal-less homeo box 2                                                                                     | DLX2    |
|             |      |      | a disintegrin-like and metalloprotease (repolysin type) with thrombospondin type 1 motif, 5 (aggrecanase-2) | ADAMTS5 |
| 219935_at   | -1.6 |      | pleckstrin homology-like domain, family A, member 1                                                         | PHLDA1  |
| 217996_at   | -1   |      | frizzled (Drosophila) homolog 7                                                                             | FZD7    |
| 203706_s_at | -1.1 | -1.5 | frizzled (Drosophila) homolog 7                                                                             | FZD7    |
| 203817_at   |      | -1.5 | guanylate cyclase 1, soluble, beta 3                                                                        | GUCY1B3 |
| 206630_at   | -2.1 |      | tyrosinase (oculocutaneous albinism IA)                                                                     | TYR     |
| 202403_s_at | -1.3 | -2   | collagen, type I, alpha 2                                                                                   | COL1A2  |
| 206002_at   | -2.1 | -2.3 | G protein-coupled receptor 64                                                                               | GPR64   |
| 205752_s_at | -1   | -1.2 | glutathione S-transferase M5                                                                                | GSTM5   |
| 212226_s_at |      | -1.2 | phosphatidic acid phosphatase type 2B                                                                       | PPAP2B  |
| 212230_at   | -1.6 | -1.3 | phosphatidic acid phosphatase type 2B                                                                       | PPAP2B  |
| 207233_s_at | -1.8 |      | microphthalmia-associated transcription factor                                                              | MITF    |
| 219511_s_at |      | -1.2 | synuclein alpha interacting protein                                                                         | SNCAIP  |
| 213931_at   | -1   |      | inhibitor of DNA binding 2, dominant negative helix-loop-helix protein                                      | ID2     |
| 211343_s_at |      | -1.8 | (clones HT-(125,133)) alpha-2 type IV collagen                                                              | COL4A2  |
| 202936_s_at | -1.1 | -0.9 | SRY (sex determining region Y)-box 9 (campomelic dysplasia, autosomal sex-reversal)                         | SOX9    |
| 202935_s_at | -1.9 |      | SRY (sex determining region Y)-box 9 (campomelic dysplasia, autosomal sex-reversal)                         | SOX9    |
|             |      |      | Homo sapiens cDNA: FLJ23324 fis, clone HEP12482, highly similar to HUMMYOHC Human                           |         |
| 212372_at   |      | -1.1 | nonmuscle myosin heavy chain-B (MYH10) mRNA.                                                                |         |
| 207069_s_at |      | -1.6 | MAD (mothers against decapentaplegic, Drosophila) homolog 6                                                 | MADH6   |

|             |      |      |                                                                                                |         |
|-------------|------|------|------------------------------------------------------------------------------------------------|---------|
| 201626_at   |      | -1.2 | insulin induced gene 1                                                                         | INSIG1  |
| 201860_s_at | -1.4 |      | plasminogen activator, tissue                                                                  | PLAT    |
| 200762_at   | -1.9 | -1.9 | dihydropyrimidinase-like 2                                                                     | DPYSL2  |
| 209242_at   | -0.9 | -1.2 | paternally expressed 3                                                                         | PEG3    |
| 213764_s_at |      | -2.8 | paternally expressed 3                                                                         | PEG3    |
| 211466_at   | -1.2 | -1.1 | nuclear factor I B3 mRNA,                                                                      | NFIB    |
| 201278_at   | -1.9 |      | disabled (Drosophila) homolog 2 (mitogen-responsive phosphoprotein)                            | DAB2    |
| 211959_at   | -0.9 | -1.1 | Human insulin-like growth factor binding protein 5                                             | IGFBP5  |
| 202746_at   | -1.2 | -0.8 | integral membrane protein 2A                                                                   | ITM2A   |
| 205696_s_at |      | -1.5 | GDNF family receptor alpha 1                                                                   | GFRA1   |
| 201952_at   |      | -1.6 | activated leucocyte cell adhesion molecule                                                     | ALCAM   |
| 206382_s_at |      | -2.6 | brain-derived neurotrophic factor                                                              | BDNF    |
| 203666_at   | -1.1 |      | stromal cell-derived factor 1                                                                  | SDF1    |
| 211161_s_at | -1   |      | PRO3121                                                                                        | COL3A1  |
| 211980_at   | -1.9 | -1.2 | collagen, type IV, alpha 1                                                                     | COL4A1  |
| 211343_s_at |      | -1.8 | (clones HT-(125,133)) alpha-2 type IV collagen                                                 | COL4A2  |
| 203325_s_at |      | -1.1 | collagen, type V, alpha 1                                                                      | COL5A1  |
| 213428_s_at | -0.7 | -1.1 | collagen, type VI, alpha 1                                                                     | COL6A1  |
| 201645_at   | -1.3 |      | hexabrachion (tenascin C, cytotactin)                                                          | HXB     |
| 213680_at   |      | P    | keratin 6A                                                                                     | KRT6A   |
| 204682_at   | -0.9 | -1   | latent transforming growth factor beta binding protein 2                                       | LTBP2   |
| 208636_at   | -0.7 | -1.1 | actinin, alpha 1                                                                               | ACTN1   |
| 203914_x_at | -1.1 |      | hydroxyprostaglandin dehydrogenase 15-(NAD)                                                    | HPGD    |
| 200602_at   | -0.6 | -1.2 | amyloid beta (A4) precursor protein (protease nexin-II, Alzheimer disease)                     | APP     |
| 210835_s_at |      | -1   | ribeye mRNA                                                                                    | CTBP2   |
| 32811_at    | -1.1 |      | myosin-I beta                                                                                  | MYO1B   |
| 203759_at   | -1.5 |      | sialyltransferase 4C (beta-galactosidase alpha-2,3-sialyltransferase)                          | SIAT4C  |
| 202668_at   |      | -1.3 | ephrin-B2                                                                                      | EFNB2   |
| 204037_at   |      | -1.2 | endothelial differentiation, lysophosphatidic acid G-protein-coupled receptor, 2               | EDG2    |
| 202436_s_at | -2.2 | -1.2 | cytochrome P450, subfamily I (dioxin-inducible), polypeptide 1 (glaucoma 3, primary infantile) | CYP1B1  |
| 202435_s_at | -2.3 |      | cytochrome P450, subfamily I (dioxin-inducible), polypeptide 1 (glaucoma 3, primary infantile) | CYP1B1  |
| 202437_s_at | -3.5 | -2.7 | cytochrome P450, subfamily I (dioxin-inducible), polypeptide 1 (glaucoma 3, primary infantile) | CYP1B1  |
| 206346_at   | -1.1 |      | prolactin receptor                                                                             | PRLR    |
| 213591_at   |      | -1.1 | aldehyde dehydrogenase 7 family, member A1                                                     | ALDH7A1 |
| 205399_at   |      | -1.6 | doublecortin and CaM kinase-like 1                                                             | DCAMK1  |
| 214607_at   |      | -1.7 | p21 (CDKN1A)-activated kinase 3                                                                | PAK3    |

**Genes that are upregulated in mouse keratinocyte SCs but downregulated in human alpha 6+/MHCI- cells (upregulated in human alpha 6+/MHCI+ cells)**

|             |      |     |                                                                          |         |
|-------------|------|-----|--------------------------------------------------------------------------|---------|
| 208310_s_at | 1.1  |     | folliculin-like 1                                                        | FSTL1   |
| 208893_s_at |      | 3.5 | clone MGC:12852, mRNA                                                    | DUSP6   |
| 217764_s_at | 1    | 0.5 | small GTP-binding protein rab22b mRNA                                    | RAB31   |
| 202206_at   | 0.5  | 1.6 | ADP-ribosylation factor-like 7                                           | ARL7    |
| 202196_s_at |      | 2.5 | dickkopf (Xenopus laevis) homolog 3                                      | DKK3    |
| 205289_at   |      | 1.3 | bone morphogenetic protein 2                                             | BMP2    |
| 201970_s_at | 1.7  | 2.9 | nuclear autoantigenic sperm protein (histone-binding)                    | NASP    |
| 205081_at   |      | 1.4 | cysteine-rich protein 1 (intestinal)                                     | CRIP1   |
| 221524_s_at | 1.1  | 1.2 | Rag D                                                                    | RAGD    |
| 214693_x_at |      | 4.4 | phosphatidic acid phosphatase type 2A                                    | PPAP2A  |
| 208864_s_at | 1    | 1   | thioredoxin                                                              | TXN     |
| 212249_at   |      | 1   | phosphoinositide-3-kinase, regulatory subunit, polypeptide 1 (p85 alpha) | PIK3R1  |
| 201802_at   | 1.3  |     | solute carrier family 29 (nucleoside transporters), member 1             | SLC29A1 |
| 205909_at   | 1.4  | 0.6 | polymerase (DNA directed), epsilon 2                                     | POLE2   |
| 210809_s_at |      | 1.1 | osteoblast specific factor 2                                             | osf-2   |
| 209129_at   |      | 1.4 | Human zyxin related protein ZRP-1 mRNA, complete cds.                    | TRIP6   |
| 200626_s_at | -0.5 | 1.4 | matrin 3                                                                 | MATR3   |

**Genes that are downregulated in both mouse keratinocyte SCs and in human alpha 6+/MHCI- cells**

|             |     |     |                                                                                             |        |
|-------------|-----|-----|---------------------------------------------------------------------------------------------|--------|
| 203888_at   | 1.1 |     | thrombomodulin                                                                              | THBD   |
| 203748_x_at |     | 4.2 | RNA binding motif, single stranded interacting protein 1 (RBMS1), transcript variant MSSP-2 | RBMS1  |
| 207266_x_at |     | 3.5 | RNA binding motif, single stranded interacting protein 1 (RBMS1), transcript variant MSSP-3 | RBMS1  |
| 202431_s_at |     | 1   | v-myc avian myelocytomatosis viral oncogene homolog                                         | MYC    |
| 203981_s_at |     | 1.8 | ATP-binding cassette, sub-family D (ALD), member 4                                          | ABCD4  |
| 205480_s_at | 0.7 | 1.6 | UDP-glucose pyrophosphorylase 2                                                             | UGP2   |
| 212143_s_at | 1.1 |     | insulin-like growth factor binding protein 3                                                | IGFBP3 |
| 208606_s_at | 0.7 | 3.6 | wingless-type MMTV integration site family, member 4                                        | WNT4   |
| 204750_s_at |     | 1.8 | desmocollin 2                                                                               | DSC2   |

|             |     |     |                                                                                                  |             |
|-------------|-----|-----|--------------------------------------------------------------------------------------------------|-------------|
| 200800_s_at |     | 2.4 | heat shock 70kD protein 1A                                                                       | HSPA1A      |
| 202712_s_at | 1   | 0.8 | creatine kinase, mitochondrial 1 (ubiquitous), nuclear gene encoding mitochondrial protein, mRNA | CKMT1       |
| 209305_s_at |     | 1.4 | growth arrest and DNA-damage-inducible protein GADD45beta                                        | GADD45B     |
| 210426_x_at | 0.6 | 2.4 | orphan hormone nuclear receptor RORalpha1                                                        | RORA        |
| 204636_at   | 0.4 | 1.8 | annexin A2 / Human lipocortin (LIP) 2 pseudogene mRNA, complete cds-like region                  | ANXA2       |
| 204863_s_at |     | 2.2 | collagen, type XVII, alpha 1                                                                     | COL17A1     |
| 201012_at   |     | 1.7 | interleukin 6 signal transducer (gp130, oncostatin M receptor)                                   | IL6ST       |
| 208944_at   |     | 1.4 | annexin I                                                                                        | ANXA1       |
| 206400_at   | 0.3 | 1.3 | TGF-betaIIIR alpha                                                                               | TGFBR2      |
| 201820_at   | 1   | 1.8 | lectin, galactoside-binding, soluble, 7 (galectin 7)                                             | LGALS7      |
| 204734_at   |     | 1.2 | keratin 5 (epidermolysis bullosa simplex, Dowling-MearaKobnerWeber-Cockayne types)               | KRT5        |
| 204614_at   |     | 1   | keratin 15                                                                                       | KRT15       |
| 206421_s_at | 1.8 | 4   | serine (or cysteine) proteinase inhibitor, clade B (ovalbumin), member 2                         | SERPINB2    |
| 219936_s_at |     | 1.3 | serine (or cysteine) proteinase inhibitor, clade B (ovalbumin), member 7                         | SERPINB7    |
| 201506_at   | 1.2 | 1.3 | G protein-coupled receptor 87                                                                    | GPR87       |
| 201487_at   | P   | P   | transforming growth factor, beta-induced, 68kD                                                   | TGFBI       |
| 203798_s_at | 1.2 | 0.9 | cathepsin C                                                                                      | CTSC        |
| 206165_s_at |     | 1.7 | visinin-like 1                                                                                   | VSNL1       |
| 206276_at   | 2   | 0.5 | calcium activated chloride channel 2 precursor                                                   | CLCA2       |
| 212022_s_at |     | 2   | lymphocyte antigen 6 complex, locus D                                                            | E48         |
| 204170_s_at | 1.1 | 0.7 | antigen identified by monoclonal antibody Ki-67                                                  | MKI67       |
| 218009_s_at | 1.6 | 0.9 | CDC28 protein kinase 2                                                                           | CKS2        |
| 211911_x_at | 1.1 |     | protein regulator of cytokinesis 1                                                               | PRC1        |
| 217456_x_at |     | 1.1 | MHC class I HLA B71                                                                              | HLA-B       |
| 208729_x_at | 2.4 |     | MHC class I HLA-B51                                                                              | HLA-B       |
| 209140_x_at | 1   | 2   | major histocompatibility complex, class I, B                                                     | HLA-B       |
| 214459_x_at | 0.7 | 1.1 | MHC HLA-B39                                                                                      | HLA-B39     |
| 211799_x_at | 2.9 |     | Cw1 antigen mRNA                                                                                 | HLA-C       |
| 200905_x_at |     | 1   | HLA class I heavy chain                                                                          | HLA-Cw*1701 |
| 200904_at   | 0.6 | 1.6 | major histocompatibility complex, class I, E                                                     | HLA-E       |
| 200041_s_at | 1.7 | 1   | H.sapiens HLA-E gene.                                                                            | HLA-E       |
| 212384_at   |     | 1   | HLA-B associated transcript-1                                                                    | D6S81E      |
| 221455_s_at |     | 3.8 | HLA-B associated transcript-1                                                                    | D6S81E      |
| 214710_s_at | 2.2 | 1.8 | wingless-type MMTV integration site family, member 3                                             | WNT3        |
| 202705_at   | 1.7 | 0.6 | cyclin B1                                                                                        | CCNB1       |
| 208711_s_at |     | 1.3 | cyclin B2                                                                                        | CCNB2       |
| 200951_s_at |     | 3.3 | cyclin D1 (PRAD1: parathyroid adenomatosis 1)                                                    | CCND1       |
| 205393_s_at | 1.7 |     | cyclin D2                                                                                        | CCND2       |
| 203968_s_at | 1.6 |     | CHK1 (checkpoint, S.pombe) homolog                                                               | CHEK1       |
|             |     |     | CDC6 (cell division cycle 6, S. cerevisiae) homolog                                              | CDC6        |

**Genes that are downregulated in mouse keratinocyte SCs but upregulated in human alpha 6+/MHC1- cells (downregulated in human alpha 6+/MHC1+ cells)**

|             |      |      |                                                                                                                                                                                     |         |
|-------------|------|------|-------------------------------------------------------------------------------------------------------------------------------------------------------------------------------------|---------|
| 219773_at   | -1   |      | NADPH oxidase 4                                                                                                                                                                     | NOX4    |
| 213348_at   | -1.1 |      | cyclin-dependent kinase inhibitor 1C (p57, Kip2)                                                                                                                                    | CDKN1C  |
| 213183_s_at | -1.5 | -2.1 | cyclin-dependent kinase inhibitor 1C (p57, Kip2)                                                                                                                                    | CDKN1C  |
| 222043_at   |      | -1.2 | clusterin (complement lysis inhibitor, SP-40,40, sulfated glycoprotein 2, testosterone-repressed prostate message 2, apolipoprotein J)                                              | CLU     |
| 218313_s_at | -1.1 |      | UDP-N-acetyl-alpha-D-galactosamine:polypeptide N-acetylgalactosaminyltransferase 7 (GalNAc-T7)                                                                                      | GALNT7  |
| 204869_at   | -1.6 | -1.7 | proprotein convertase subtilisin/kexin type 2                                                                                                                                       | PCSK2   |
| 213560_at   |      | -1.3 | growth arrest and DNA-damage-inducible, beta                                                                                                                                        | GADD45B |
| 207002_s_at | -1   |      | pleiomorphic adenoma gene-like 1 isoform 1                                                                                                                                          | PLAGL1  |
| 207943_x_at | -1   |      | pleiomorphic adenoma gene-like 1 isoform 1                                                                                                                                          | PLAGL1  |
| 205372_at   | -0.6 | -1.3 | pleiomorphic adenoma gene-like 1 isoform 1                                                                                                                                          | PLAGL1  |
| 205861_at   | -1   |      | Spi-B transcription factor (Spi-1PU.1 related)                                                                                                                                      | SPIB    |
| 202820_at   | -1   |      | aryl hydrocarbon receptor                                                                                                                                                           | AHR     |
| 209120_at   |      | -1   | nuclear receptor subfamily 2, group F, member 2                                                                                                                                     | NR2F2   |
| 202002_at   |      | -1.5 | acetyl-Coenzyme A acyltransferase 2 (mitochondrial 3-oxoacyl-Coenzyme A thiolase)                                                                                                   | ACAA2   |
| 204584_at   |      | -2.5 | L1 cell adhesion molecule (hydrocephalus, stenosis of aqueduct of Sylvius 1, MASA (mental retardation, aphasia, shuffling gait and adducted thumbs) syndrome, spastic paraplegia 1) | L1CAM   |
| 202019_s_at | -1.1 |      | LanC (bacterial lantibiotic synthetase component C)-like 1                                                                                                                          | LANCL1  |
| 202709_at   | -1   |      | fibromodulin precursor                                                                                                                                                              | FMOD    |
| 221963_x_at | -1.1 |      | thrombospondin 1                                                                                                                                                                    | THBS1   |
| 201110_s_at | -2.3 | -1.9 | thrombospondin 1                                                                                                                                                                    | THBS1   |
| 205590_at   | -1.3 | -2.6 | RAS guanyl releasing protein 1 (calcium and DAG-regulated)                                                                                                                          | RASGRP1 |

List of the genes that are differentially expressed in  $\alpha 6^{+}/\text{MHCI}^{+}$  cells vs.  $\alpha 6^{+}/\text{MHCI}^{-}$  cells and also expressed in murine hair follicle SCs (MHFSC). “-“sign indicates that the gene is upregulated in  $\alpha 6^{+}/\text{MHCI}^{-}$  cells. The numbers that show the difference in the level of gene expression are in log2 scale.
