# Supplementary material for: Transcriptional profiling of putative human epithelial stem cells
Source: PubMed Central journal article supplement (PMC2536675; doi:10.1186/1471-2164-9-359), 2008-07-30
Supplement: 1471-2164-9-359-S5.pdf [file 1471-2164-9-359-S5.pdf]

### Tcf3 and its targets

#### The genes that are upregulated by Tcf3 and also upregulated in human alpha 6+/MHCI- cells

|             |      |      |                                                                                                              |        |
|-------------|------|------|--------------------------------------------------------------------------------------------------------------|--------|
| 213730_x_at | -1   |      | transcription factor 3 (E2A immunoglobulin enhancer binding factors E12E47)                                  | TCF3   |
| 209153_s_at | -1.3 |      | transcription factor 3 (E2A immunoglobulin enhancer binding factors E12E47)                                  | TCF3   |
| 221016_s_at | -1.5 |      | HMG-box transcription factor TCF-3                                                                           | TCF3   |
| 213348_at   | -1.1 |      | cyclin-dependent kinase inhibitor 1C (p57, Kip2)                                                             | CDKN1C |
| 213183_s_at | -1.5 | -2.1 | cyclin-dependent kinase inhibitor 1C (p57, Kip2)                                                             | CDKN1C |
| 201538_s_at | -1.3 |      | dual specificity phosphatase 3 (vaccinia virus phosphatase VH1-related)                                      | DUSP3  |
| 202806_at   | -1.5 |      | drebrin 1                                                                                                    | DBN1   |
| 206580_s_at | -1.2 |      | EGF-containing fibulin-like extracellular matrix protein 2                                                   | EFEMP2 |
| 204154_at   | -1.4 | -1.1 | cysteine dioxygenase, type I                                                                                 | CDO1   |
| 204736_s_at | -2.1 |      | melanoma-associated chondroitin sulfateproteoglycan 4                                                        | CSPG4  |
| 214297_at   | -2.1 |      | chondroitin sulfate proteoglycan 4 (melanoma-associated)                                                     | CSPG4  |
| 211959_at   | -0.9 | -1.1 | Human insulin-like growth factor binding protein 5                                                           | IGFBP5 |
| 213993_at   | -1.3 | -3.9 | spondin 1, (f-spondin) extracellular matrix protein                                                          | SPON1  |
| 219883_at   | -1.3 |      | potassium inwardly-rectifying channel, subfamily K, member 4                                                 | KCNK4  |
| 202686_s_at | -0.8 | -1.6 | AXL receptor tyrosine kinase isoform 1precursor                                                              | AXL    |
| 205064_at   | -1.5 | -1.3 | small proline-rich protein 1B (cornifin)                                                                     | SPRR1B |
| 208161_s_at |      | -1.1 | Homo sapiens ATP-binding cassette, sub-family C (CFTRMRP), member 3 (ABCC3), transcript variant MRP3A, mRNA. | ABCC3  |

#### The genes that are downregulated by Tcf3 and upregulated in human alpha 6+/MHCI+ cells

|             |     |     |                                                                            |         |
|-------------|-----|-----|----------------------------------------------------------------------------|---------|
| 205809_s_at | 3.3 |     | Wiskott-Aldrich syndrome-like                                              | WASL    |
| 205891_at   | 0.5 | 1.5 | adenosine A2b receptor                                                     | ADORA2B |
| 210426_x_at | 0.6 | 2.4 | orphan hormone nuclear receptor RORalpha1                                  | RORA    |
| 200951_s_at |     | 3.3 | cyclin D2                                                                  | CCND2   |
| 206165_s_at |     | 1.7 | calcium activated chloride channel 2 precursor                             | CLCA2   |
| 204822_at   | 1.1 | 1.1 | TTK protein kinase                                                         | TTK     |
| 217165_x_at |     | 1.6 | metallothionein 1F (functional)                                            | MT1F    |
| 204745_x_at |     | 1.1 | metallothionein 1G                                                         | MT1G    |
| 203560_at   | 0.8 | 1.2 | gamma-glutamyl hydrolase (conjugase,folylpolyglutamyl hydrolase) precursor | GGH     |

Expression of TCF3 targets in  $\alpha 6^{+}/\text{MHCI}^{-}$  and  $\alpha 6^{+}/\text{MHCI}^{+}$  cells. The table shows the difference in the expression in  $\alpha 6^{+}/\text{MHCI}^{+}$  cells vs.  $\alpha 6^{+}/\text{MHCI}^{-}$  cells. “-“sign indicates that the gene is upregulated in  $\alpha 6^{+}/\text{MHCI}^{-}$  cells. The numbers that show the difference in the level of gene expression are in log2 scale.
