# Supplementary material for: Transcriptional profiling of putative human epithelial stem cells
Source: PubMed Central journal article supplement (PMC2536675; doi:10.1186/1471-2164-9-359), 2008-07-30
Supplement: 1471-2164-9-359-S6.pdf [file 1471-2164-9-359-S6.pdf]

**Genes that are upregulated by c-myc transcription factor and upregulated in human alpha 6+/MHC1+ cells**

|             |     |      |                                                                                                                 |              |
|-------------|-----|------|-----------------------------------------------------------------------------------------------------------------|--------------|
| 202431_s_at |     | 1    | v-myc avian myelocytomatosis viral oncogene homolog                                                             | MYC          |
| 214710_s_at | 2.2 | 1.8  | cyclin B1                                                                                                       | CCNB1        |
| 200951_s_at |     | 3.3  | cyclin D2                                                                                                       | CCND2        |
| 207076_s_at | 0.6 | 1.6  | argininosuccinate synthetase                                                                                    | ASS          |
| 207332_s_at | 0.6 | 0.6  | transferrin receptor (p90, CD71)                                                                                | TFRC         |
| 200806_s_at | 1.8 | 1.7  | heat shock 60kD protein 1 (chaperonin)                                                                          | HSPD1        |
| 200692_s_at | 1.3 | 2.7  | heat shock 70kD protein 9B (mortalin-2)                                                                         | HSPA9B       |
| 200800_s_at |     | 2.4  | heat shock 70kD protein 1A                                                                                      | HSPA1A       |
| 211968_s_at | 1.6 | 2.2  | heat shock 90kD protein 1, alpha                                                                                | HSPCA        |
| 214359_s_at | 1.3 |      | heat shock 90kD protein 1, beta                                                                                 | HSPCB        |
| 221699_s_at | 1.2 |      | nucleolar protein GU2                                                                                           |              |
| 209567_at   |     | 1.5  | Similar to regulator for ribosome resistance homolog (S. cerevisiae)                                            | KIAA0112     |
| 201530_x_at |     | 1    | eukaryotic translation initiation factor 4A, isoform 1                                                          | EIF4A1       |
| 203712_at   | 1.1 | 0.9  | KIAA0020 gene product                                                                                           | KIAA0020     |
|             |     | 1.6  | Homo sapiens cDNA FLJ20815 fis, clone ADSE01038, highly similar to AJ007398 Homo sapiens mRNA for PBK1 protein. | DKFZP564M182 |
| 212018_s_at |     |      |                                                                                                                 | DHFR         |
| 202532_s_at |     | 1.1  | dihydrofolate reductase                                                                                         | DHFR         |
| 201014_s_at | 1.4 | 2    | multifunctional polypeptide similar to SAICARSynthetase and AIR carboxylase                                     | ADE2H1       |
| 203856_at   | 1   | 0.4  | vaccinia related kinase 1                                                                                       | VRK1         |
| 202483_s_at |     | 3.4  | RAN binding protein 1                                                                                           | RANBP1       |
| 201923_at   |     | 1.3  | thioredoxin peroxidase (antioxidant enzyme)                                                                     | AOE372       |
| 201258_at   | 0.6 | 2.4  | ribosomal protein S16                                                                                           | RPS16        |
| 222037_at   | 1.2 | 3.4  | minichromosome maintenance deficient (S. cerevisiae) 4                                                          | MCM4         |
| 212141_at   | 1   |      | minichromosome maintenance deficient (S. cerevisiae) 4                                                          | MCM4         |
| 204023_at   | 1.1 | -0.1 | replication factor C (activator 1) 4 (37kD)                                                                     | RFC4         |
| 204102_s_at |     | 2.1  | translation elongation factor 2                                                                                 | EEF2         |
| 213649_at   | 1   | 1.6  | splicing factor, arginineserine-rich 7 (35kD)                                                                   | SFRS7        |
| 214141_x_at |     | 1.2  | splicing factor, arginineserine-rich 7 (35kD)                                                                   | SFRS7        |
| 201273_s_at |     | 1.6  | signal recognition particle 9kD                                                                                 | SRP9         |
| 208864_s_at | 1   | 1    | Homo sapiens thioredoxin mRNA, complete cds.                                                                    | TXN          |
| 200937_s_at |     | 3.2  | ribosomal protein L5                                                                                            | RPL5         |
| 221989_at   | 0.5 | 1.1  | ribosomal protein L10                                                                                           | RPL10        |
| 203034_s_at |     | 1.1  | ribosomal protein L27a                                                                                          | RPL27a       |
| 209203_s_at |     | 2.1  | ribosomal protein L30                                                                                           | RPL30        |
| 200002_at   |     | 1.7  | ribosomal protein L35                                                                                           | RPL35        |
| 217747_s_at | 0.3 | 1    | ribosomal protein S9                                                                                            | RPS9         |
| 201258_at   | 0.6 | 2.4  | ribosomal protein S16                                                                                           | RPS16        |
| 213414_s_at |     | 1.6  | ribosomal protein S19                                                                                           | RPS19        |
| 205081_at   |     | 1.4  | cysteine-rich protein 1 (intestinal)                                                                            | CRIP1        |
| 203213_at   | 1.7 | 1.5  | cell division cycle 2, G1 to S and G2 to M                                                                      | CDC2         |
| 203214_x_at | 1.4 |      | cell division cycle 2, G1 to S and G2 to M                                                                      | CDC2         |
| 210559_s_at | 1.2 |      | CDC2 delta T                                                                                                    | CDC2         |
| 200853_at   | 0.8 | 1.3  | H2A histone family, member Z                                                                                    | H2AFZ        |
| 207168_s_at |     | 1    | H2A histone family, member Y                                                                                    | H2AFY        |
| 217871_s_at | 0.4 | 1.8  | macrophage migration inhibitory factor (glycosylation-inhibiting factor)                                        | MIF          |
| 212085_at   |     | 1.6  | solute carrier family 25 (mitochondrial carrier; adenine nucleotide translocator), member 6                     | SLC25A6      |
| 208900_s_at |     | 1.9  | topoisomerase (DNA) I                                                                                           | TOP1         |
| 201577_at   | 1.2 | 1.2  | non-metastatic cells 1 protein                                                                                  | NME1         |
| 204695_at   | 2.6 |      | cell division cycle 25A                                                                                         | CDC25A       |
| 201030_x_at | 0.6 | 1    | lactate dehydrogenase B                                                                                         | LDHB         |
| 200920_s_at | 0.6 | 3.5  | B-cell translocation gene 1, anti-proliferative                                                                 | BTG1         |
| 208930_s_at |     | 1.7  | interleukin enhancer binding factor 3, 90kD                                                                     | ILF3         |
| 209330_s_at | 1.3 | 0.9  | heterogeneous nuclear ribonucleoprotein D                                                                       | HNRPD        |
| 210949_s_at |     | 1.4  | Similar to eukaryotic translation initiation factor 3, subunit 8 (110kD)                                        | EIF3S8       |
| 200841_s_at |     | 2.5  | glutamyl-prolyl-tRNA synthetase                                                                                 | EPRS         |
| 204531_s_at | 1   | 0.1  | breast cancer 1, early onset                                                                                    | BRCA1        |
| 209421_at   | 0.7 | 1.3  | mutS (E. coli) homolog 2 (colon cancer, nonpolyposis type 1)                                                    | hMSH2        |
| 200973_s_at | 1.2 |      | tetraspan 3                                                                                                     | TSPAN-3      |
| 218671_s_at | 1.1 |      | ATPase inhibitor precursor                                                                                      | LOC51189     |
| 200728_at   | 0.7 | 2    | ARP2 (actin-related protein 2, yeast) homolog                                                                   | ACTR2        |
| 213047_x_at | 0.4 |      | SET translocation (myeloid leukemia-associated)                                                                 | SET          |
| 216520_s_at |     | 2.6  | tumor protein, translationally-controlled 1                                                                     | TPT1         |
| 200596_s_at |     | 1.7  | eukaryotic translation initiation factor 3, subunit 10                                                          | EIF3S10      |
| 208816_x_at |     | 1.8  | annexin A2 / Human lipocortin (LIP) 2 pseudogene mRNA, complete cds-like region                                 | ANXA2        |
| 201820_at   | 1   |      | keratin 5 (epidermolysis bullosa simplex, Dowling-MearaKobnerWeber-Cockayne types)                              | KRT5         |
| 201305_x_at | 1   |      | acidic protein rich in leucines                                                                                 | SSP29        |
| 204278_s_at |     | 1.6  | Homo sapiens estrogen receptor binding site associated, antigen, 9 (EBAG9), mRNA                                | EBAG9        |

**Genes that are downregulated by c-myc transcription factor and downregulated in human alpha 6+/MHC1+ cells**

|           |      |  |                                                                        |     |
|-----------|------|--|------------------------------------------------------------------------|-----|
| 213931_at | -1   |  | inhibitor of DNA binding 2, dominant negative helix-loop-helix protein | ID2 |
| 206132_at | -1.1 |  | mutated in colorectal cancers                                          | MCC |

|             |      |      |                                                                                                                                        |        |
|-------------|------|------|----------------------------------------------------------------------------------------------------------------------------------------|--------|
| 218637_at   | -0.9 | -1.1 | hypothetical protein IMPACT                                                                                                            | IMPACT |
| 221963_x_at | -1.1 |      | thrombospondin 1                                                                                                                       | THBS1  |
| 201110_s_at | -2.3 | -1.9 | thrombospondin 1                                                                                                                       | THBS1  |
| 202311_s_at |      | -2   | collagen, type I, alpha 1                                                                                                              | COL1A1 |
| 202403_s_at | -1.3 | -2   | collagen, type I, alpha 2                                                                                                              | COL1A2 |
| 202404_s_at |      | -3.7 | collagen, type I, alpha 2                                                                                                              | COL1A2 |
| 211161_s_at | -1   |      | PRO3121                                                                                                                                | COL3A1 |
| 211980_at   | -1.9 | -1.2 | collagen, type IV, alpha 1                                                                                                             | COL4A1 |
| 203325_s_at |      | -1.1 | collagen, type V, alpha 1                                                                                                              | COL5A1 |
| 213428_s_at | -0.7 | -1.1 | collagen, type VI, alpha 1                                                                                                             | COL6A1 |
| 203749_s_at |      | -1.3 | retinoic acid receptor, alpha                                                                                                          | RARA   |
| 214023_x_at |      | -1.5 | tubulin, beta polypeptide                                                                                                              | TUBB   |
| 213275_x_at | -1.4 | -1   | cathepsin B                                                                                                                            | CTSB   |
| 202686_s_at | -0.8 | -1.6 | AXL receptor tyrosine kinase isoform 1precursor                                                                                        | AXL    |
| 204115_at   |      | -1.1 | guanine nucleotide binding protein 11                                                                                                  | GNG11  |
| 221372_s_at |      | -1.8 | purinergic receptor P2X, ligand-gated ionchannel, 2                                                                                    | P2RX2  |
| 212732_at   |      | -1.7 | maternally expressed 3                                                                                                                 | MEG3   |
|             |      | -1.2 | clusterin (complement lysis inhibitor, SP-40,40, sulfated glycoprotein 2, testosterone-repressed prostate message 2, apolipoprotein J) | CLU    |
| 222043_at   |      |      |                                                                                                                                        |        |
| 210195_s_at | -1   |      | Human pregnancy-specific beta-1-glycoprotein mRNA PSG95, complete cds.                                                                 | PSG1   |

Expression of MYC targets in  $\alpha 6^{+}/\text{MHCI}^{-}$  and  $\alpha 6^{+}/\text{MHCI}^{+}$  cells. The table shows the difference in the expression in  $\alpha 6^{+}/\text{MHCI}^{+}$  cells vs.  $\alpha 6^{+}/\text{MHCI}^{-}$  cells. “-“sign indicates that the gene is upregulated in  $\alpha 6^{+}/\text{MHCI}^{-}$  cells. The numbers that show the difference in the level of gene expression are in log2 scale.
