# Supplementary material for: Transcriptional profiling of putative human epithelial stem cells
Source: PubMed Central journal article supplement (PMC2536675; doi:10.1186/1471-2164-9-359), 2008-07-30
Supplement: 1471-2164-9-359-S7.pdf [file 1471-2164-9-359-S7.pdf]

# Flow cytometry data of sorted cells that donated RNA for microarray experiments.

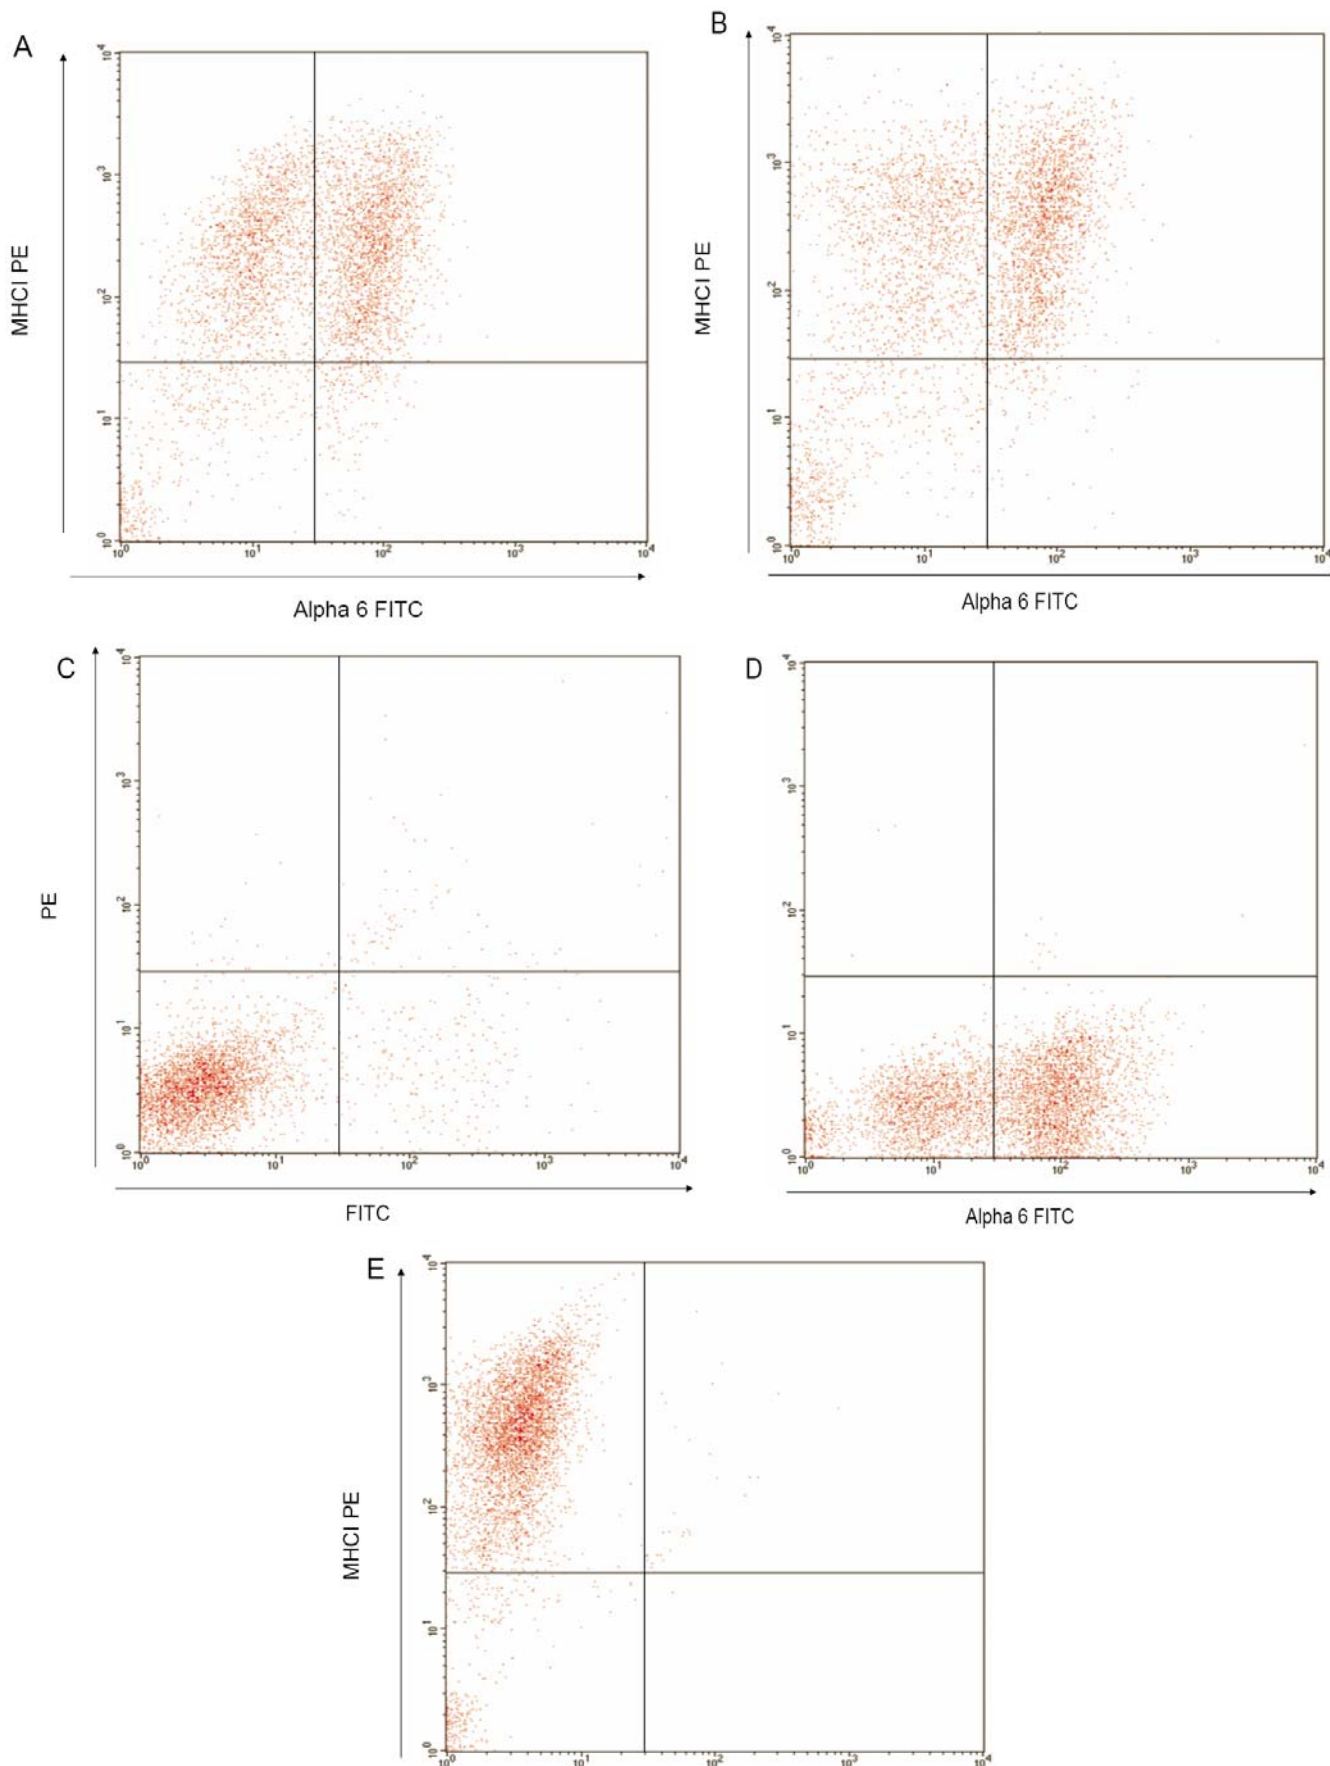

Gates in A & B were set using isotype control and single color positive controls (C-E). (A) Figure showing flow cytometry analysis of the expression of MHC I and  $\alpha 6$  integrin on keratinocytes sorted by FACS and used in the first microarray. (B) Figure showing flow cytometry analysis of the expression of MHC I and  $\alpha 6$  integrin on keratinocytes sorted by FACS and used in the second microarray. Cells in the lower right quadrant are  $\alpha 6^+/\text{MHC I}^-$ . Cells in the upper right quadrant are  $\alpha 6^+/\text{MHC I}^+$ . (C) Representative isotype control. (D) Representative single color positive control for FITC. (E) Representative single color positive control for PE.
