# Supplementary material for: Transcriptional profiling of putative human epithelial stem cells
Source: PubMed Central journal article supplement (PMC2536675; doi:10.1186/1471-2164-9-359), 2008-07-30
Supplement: 1471-2164-9-359-S8.pdf [file 1471-2164-9-359-S8.pdf]

| Probe Set   | Exp. 1<br>Signal<br>Log<br>Ratio | Exp. 2<br>Signal<br>Log<br>Ratio | Description / Product                                                                            | Gene Symbol |
|-------------|----------------------------------|----------------------------------|--------------------------------------------------------------------------------------------------|-------------|
| 200041_s_at | 1.7                              | 1                                | HLA-B associated transcript-1                                                                    | D6S81E      |
| 200644_at   | -1.8                             | -1                               | macrophage myristoylated alanine-rich C kinasesubstrate                                          | MACMARCKS   |
| 200692_s_at | 1.3                              | 2.7                              | heat shock 70kD protein 9B (mortalin-2)                                                          | HSPA9B      |
| 200762_at   | -1.9                             | -1.9                             | dihydropyrimidinase-like 2                                                                       | DPYSL2      |
| 200806_s_at | 1.8                              | 1.7                              | heat shock 60kD protein 1 (chaperonin)                                                           | HSPD1       |
| 200883_at   | 1.4                              | 1                                | ubiquinol-cytochrome c reductase core protein II                                                 | UQCRC2      |
| 200900_s_at | 2.8                              | 1.4                              | mannose-6-phosphate receptor (cation dependent)                                                  | M6PR        |
| 200993_at   | 1                                | 1.2                              | RAN binding protein 7                                                                            | RANBP7      |
| 201014_s_at | 1.4                              | 2                                | multifunctional polypeptide similar to SAICARSynthetase and AIR carboxylase                      | ADE2H1      |
| 201068_s_at | 1                                | 1                                | proteasome (prosome, macropain) 26S subunit,ATPase, 2                                            | PSMC2       |
| 201110_s_at | -2.3                             | -1.9                             | thrombospondin 1                                                                                 | THBS1       |
| 201112_s_at | 1.1                              | 2.1                              | chromosome segregation 1 (yeast homolog)-like                                                    | CSE1L       |
| 201117_s_at | -1.9                             | -1.3                             | carboxypeptidase E precursor                                                                     | CPE         |
| 201163_s_at | -2.2                             | -1.6                             | insulin-like growth factor binding protein 7                                                     | IGFBP7      |
| 201198_s_at | 1.2                              | 1                                | proteasome (prosome, macropain) 26S subunit, non-ATPase, 1                                       | PSMD1       |
| 201291_s_at | 4.5                              | 2.1                              | topoisomerase (DNA) II alpha (170kD)                                                             | TOP2A       |
| 201292_at   | 2                                | 2.1                              | topoisomerase (DNA) II alpha (170kD)                                                             | TOP2A       |
| 201506_at   | 1.2                              | 1.3                              | transforming growth factor, beta-induced, 68kD                                                   | TGFB1       |
| 201577_at   | 1.2                              | 1.2                              | non-metastatic cells 1 protein                                                                   | NME1        |
| 201725_at   | 1.4                              | 1.1                              | D123 gene product                                                                                | D123        |
| 201811_x_at | -1                               | -1.2                             | SH3-domain binding protein 5 (BTK-associated)                                                    | SH3BP5      |
| 201831_s_at | 3.1                              | 4.4                              | vesicle docking protein p115                                                                     | P115        |
| 201859_at   | -1.6                             | -1.1                             | proteoglycan 1, secretory granule                                                                | PRG1        |
| 201897_s_at | 1.1                              | 1.6                              | CDC28 protein kinase 1                                                                           | CKS1        |
| 201946_s_at | 1.2                              | 2.6                              | chaperonin containing TCP1, subunit 2 (beta)                                                     | CCT2        |
| 201970_s_at | 1.7                              | 2.9                              | nuclear autoantigenic sperm protein(histone-binding)                                             | NASP        |
| 202157_s_at | -1                               | -1.2                             | RNA-binding protein BRUNOL3                                                                      | BRUNOL3     |
| 202403_s_at | -1.3                             | -2                               | collagen, type I, alpha 2                                                                        | COL1A2      |
| 202436_s_at | -2.2                             | -1.2                             | cytochrome P450, subfamily I (dioxin-inducible), polypeptide 1 (glaucoma 3, primary infantile)   | CYP1B1      |
| 202437_s_at | -3.5                             | -2.7                             | cytochrome P450, subfamily I (dioxin-inducible),polypeptide 1                                    | CYP1B1      |
| 202546_at   | 1                                | 3.2                              | vesicle-associated membrane protein 8                                                            | VAMP8       |
| 202572_s_at | -1.1                             | -1.2                             | Homo sapiens KIAA0964 protein (KIAA0964), mRNA.                                                  | KIAA0964    |
| 202908_at   | -1.1                             | -1.2                             | Wolfram syndrome protein                                                                         | WFS1        |
| 203103_s_at | 1.1                              | 1.6                              | nuclear matrix protein NMP200 related tosplicing factor PRP19                                    | NMP200      |
| 203203_s_at | 1.1                              | 1.4                              | HIV-1 rev binding protein 2                                                                      | HRB2        |
| 203213_at   | 1.7                              | 1.5                              | cell division cycle 2, G1 to S and G2 to M                                                       | CDC2        |
| 203345_s_at | 1.3                              | 1.7                              | putative DNA binding protein                                                                     | M96         |
| 203554_x_at | 1.1                              | 1                                | pituitary tumor-transforming protein 1                                                           | PTTG1       |
| 203603_s_at | -2.2                             | -1.6                             | zinc finger homeobox 1B                                                                          | ZFHXB1B     |
| 203697_at   | -3.9                             | -3.2                             | Human Fritz mRNA, complete cds.                                                                  | FRZB        |
| 203698_s_at | -2.8                             | -2.7                             | frizzled-related protein                                                                         | FRZB        |
| 203706_s_at | -1.1                             | -1.5                             | frizzled 7                                                                                       | FZD7        |
| 203764_at   | 1.9                              | 1.4                              | KIAA0008 gene product                                                                            | KIAA0008    |
| 203903_s_at | -1.2                             | -1.8                             | hephaestin                                                                                       | HEPH        |
| 204154_at   | -1.4                             | -1.1                             | cysteine dioxygenase, type I                                                                     | CDO1        |
| 204162_at   | 2.9                              | 1.9                              | highly expressed in cancer, rich in leucineheptad repeats                                        | HEC         |
| 204197_s_at | -1.6                             | -1.1                             | runt-related transcription factor 3                                                              | RUNX3       |
| 204237_at   | -1.2                             | -1                               | CED-6 protein                                                                                    | CED-6       |
| 204271_s_at | -2                               | -1.3                             | endothelin receptor                                                                              | ETs         |
| 204273_at   | -2.8                             | -1.3                             | endothelin receptor type B, isoform 1                                                            | EDNRB       |
| 204464_s_at | -1.1                             | -1.4                             | endothelin receptor type A                                                                       | EDNRA       |
| 204529_s_at | -1.8                             | -2.2                             | KIAA0808 gene product                                                                            | KIAA0808    |
| 204602_at   | -1.3                             | -1.9                             | dickkopf (Xenopus laevis) homolog 1                                                              | DKK1        |
| 204620_s_at | -2                               | -1.4                             | chondroitin sulfate proteoglycan 2 (versican)                                                    | CSPG2       |
| 204712_at   | -6.6                             | -3.8                             | Wnt inhibitory factor-1                                                                          | WIF1        |
| 204766_s_at | 3.7                              | 3.3                              | nudix (nucleoside diphosphate linked moietyX)-type motif 1                                       | NUDT1       |
| 204777_s_at | -2                               | -1.2                             | T-cell differentiation protein MAL, isoform a                                                    | MAL         |
| 204822_at   | 1.1                              | 1.1                              | TTK protein kinase                                                                               | TTK         |
| 204836_at   | -2                               | -1.9                             | glycine dehydrogenase (decarboxylating; glycinedecarboxylase, glycine cleavage system protein P) | GLDC        |
| 204869_at   | -1.6                             | -1.7                             | proprotein convertase subtilisin/kexin type 2                                                    | PCSK2       |
| 204948_s_at | -1.1                             | -1.9                             | follistatin isoform FST344 precursor                                                             | FST         |
| 204962_s_at | 1.5                              | 1.7                              | centromere protein A                                                                             | CENPA       |

|             |      |      |                                                                                                          |                |
|-------------|------|------|----------------------------------------------------------------------------------------------------------|----------------|
| 205001_s_at | 1.3  | 1.6  | dead box, Y isoform                                                                                      | DBY            |
| 205064_at   | -1.5 | -1.3 | small proline-rich protein 1B (cornifin)                                                                 | SPRR1B         |
| 205066_s_at | -1.6 | -2.1 | ectonucleotide pyrophosphatasephosphodiesterase1                                                         | ENPP1          |
| 205170_at   | -1.5 | -1.4 | signal transducer and activator of transcription2, 113kD                                                 | STAT2          |
| 205337_at   | -2.5 | -1.2 | dopachrome tautomerase (dopachrome delta-isomerase, tyrosine-related protein 2)                          | DCT            |
| 205345_at   | 1    | 2.5  | BRCA1 associated RING domain 1                                                                           | BARD1          |
| 205383_s_at | -1.1 | -1.5 | zinc finger protein 288                                                                                  | ZNF288         |
| 205404_at   | -2.1 | -2.3 | hydroxysteroid (11-beta) dehydrogenase 1                                                                 | HSD11B1        |
| 205489_at   | -1   | -1.5 | crystallin, mu                                                                                           | CRYM           |
| 205590_at   | -1.3 | -2.6 | RAS guanyl releasing protein 1                                                                           | RASGRP1        |
| 205659_at   | -1.6 | -2.5 | histone deacetylase 7B                                                                                   | HDAC7B-PENDING |
| 205694_at   | -2.3 | -1.5 | tyrosinase-related protein 1                                                                             | TYRP1          |
| 205752_s_at | -1   | -1.2 | glutathione S-transferase M5                                                                             | GSTM5          |
| 205794_s_at | -1.8 | -1.6 | neuro-oncological ventral antigen 1, isoform 1                                                           | NOVA1          |
| 205848_at   | -2.1 | -2.6 | growth arrest-specific 2                                                                                 | GAS2           |
| 206002_at   | -2.1 | -2.3 | G protein-coupled receptor 64                                                                            | GPR64          |
| 206140_at   | -5   | -4.7 | LIM homeobox protein 2                                                                                   | LHX2           |
| 206144_at   | -1.1 | -1   | BAI1-associated protein 1                                                                                | BAIAP1         |
| 206323_x_at | -1.2 | -1.2 | oligophrenin 1, Rho-GTPase activating protein                                                            | OPHN1          |
| 206377_at   | -1.3 | -1.2 | forkhead box F2                                                                                          | FOXF2          |
| 206404_at   | -1   | -1.7 | fibroblast growth factor 9 (glia-activatingfactor)                                                       | FGF9           |
| 206421_s_at | 1.8  | 4    | serine (or cysteine) proteinase inhibitor, cladeB (ovalbumin), member 7                                  | SERPINB7       |
| 206426_at   | -1   | -1.5 | melan-A                                                                                                  | MLANA          |
| 206465_at   | -2.3 | -3.5 | very long-chain acyl-CoA synthetase; lipidosis                                                           | KIAA0631       |
| 206562_s_at | 1.2  | 1.5  | casein kinase 1, alpha 1                                                                                 | CSNK1A1        |
| 206766_at   | -1.1 | -1.4 | integrin alpha 10 subunit                                                                                | ITGA10         |
| 206953_s_at | -1   | -1.6 | latrophilin                                                                                              | KIAA0786       |
| 207016_s_at | -2.2 | -2   | Homo sapiens mRNA for RALDH2-T, complete cds.                                                            | RALDH2         |
| 207165_at   | 2.1  | 1.6  | hyaluronan-mediated motility receptor (RHAMM)                                                            | HMMR           |
| 207173_x_at | -1.8 | -2.4 | OB-cadherin-1                                                                                            | osf-4          |
| 207175_at   | -1.9 | -2.3 | adipose most abundant gene transcript 1                                                                  | APM1           |
| 207184_at   | -1.1 | -1.5 | solute carrier family 6 (neurotransmittertransporter, GABA), member 13                                   | SLC6A13        |
| 207345_at   | -2   | -2.3 | folliculin isoform FST317 precursor                                                                      | FST            |
| 207369_at   | -1.4 | -1.8 | bombesin-like receptor 3                                                                                 | BRS3           |
| 207594_s_at | -1   | -1.7 | synaptojanin 1                                                                                           | SYNJ1          |
| 208095_s_at | 1.8  | 1.2  | calciumcalmodulin-dependent protein kinase (CaMkinase) II gamma                                          | CAMK2G         |
| 208309_s_at | 1    | 1.4  | mucosa associated lymphoid tissue lymphomatranslocation gene 1                                           | MALT1          |
| 208650_s_at | -1.5 | -1.1 | CD24 antigen (small cell lung carcinoma cluster 4 antigen)                                               | CD24           |
| 208662_s_at | 1    | 1.4  | tetratricopeptide repeat domain 3                                                                        | TTC3           |
| 209024_s_at | 1.2  | 1    | NS1-associated protein 1                                                                                 | NSAP1          |
| 209040_s_at | 1.5  | 3.4  | proteasome subunit LMP7                                                                                  | LMP7           |
| 209140_x_at | 1    | 2    | Homo sapiens MHC HLA-B39 mRNA, complete cds.                                                             | HLA-B39        |
| 209168_at   | -1.5 | -1.3 | glycoprotein M6B                                                                                         | GPM6B          |
| 209170_s_at | -2.5 | -1.7 | Homo sapiens m6b1 mRNA, complete cds.                                                                    | m6b1           |
| 209360_s_at | -2.3 | -1.4 | AML1b protein                                                                                            | AML1           |
| 209392_at   | -2   | -1.7 | autotaxin                                                                                                | ENPP2          |
| 209409_at   | -1.1 | -1.8 | growth factor receptor-bound protein 10                                                                  | KIAA0207       |
| 209435_s_at | -1.3 | -1   | Homo sapiens, clone MGC:3182, mRNA, complete cds.                                                        |                |
| 209512_at   | 1.1  | 2.5  | Homo sapiens, Similar to RIKEN cDNA 2610207I16 gene, clone MGC:10940, mRNA, complete cds.                |                |
| 209583_s_at | -2.9 | -1.5 | brain my033 protein                                                                                      | MOX2           |
| 209656_s_at | -1.1 | -2.4 | Homo sapiens mRNA; cDNA DKFZp761J17121 (from clone DKFZp761J17121); complete cds. / hypothetical protein | DKFZp761J17121 |
| 209771_x_at | -1.8 | -1.6 | CD24 antigen (small cell lung carcinoma cluster 4 antigen)                                               | CD24           |
| 209773_s_at | 1.4  | 2.3  | ribonucleotide reductase M2 polypeptide                                                                  | RRM2           |
| 209846_s_at | 1    | 2    | Similar to butyrophilin, subfamily 3, member A2                                                          | BTN3A2         |
| 209861_s_at | 1.2  | 2.2  | eIF-2-associated p67 homolog                                                                             | MNPEP          |
| 210105_s_at | -1.6 | -1.8 | FYN oncogene related to SRC, FGR, YES                                                                    | FYN            |
| 210115_at   | 2.8  | 1.3  | ribosomal protein L39                                                                                    |                |
| 210147_at   | -2.4 | -2.6 | mono-ADP-ribosyltransferase                                                                              | htMART         |
| 210162_s_at | -1.1 | -1.7 | NF-Atc                                                                                                   | NFATC1         |
| 210247_at   | -1.3 | -1   | synapsin II                                                                                              | SYN2           |
| 210365_at   | -1.8 | -1.5 | AML1a protein                                                                                            | AML1           |
| 210517_s_at | -1.1 | -1   | gravin                                                                                                   | AKAP12         |
| 210759_s_at | 1.2  | 1.1  | prosomal protein P30-33K                                                                                 | pros-30        |
| 210800_at   | -1.3 | -1.2 | Homo sapiens, clone MGC:12262, mRNA, complete cds.                                                       | TIMM8A         |
| 210946_at   | -1   | -1.3 | type-2 phosphatidic acid phosphatase alpha-2                                                             | PAP2-a2        |
| 211071_s_at | -1.3 | -1   | Homo sapiens, ALL1-fused gene from chromosome 1q, clone MGC:4013, mRNA, complete cds.                    |                |
| 211075_s_at | 1.1  | 1.8  | integrin associated protein                                                                              |                |

|             |      |      |                                                                                                                    |                |
|-------------|------|------|--------------------------------------------------------------------------------------------------------------------|----------------|
| 211276_at   | -1.3 | -2.4 | brain my048 protein                                                                                                |                |
| 211297_s_at | 1.5  | 2.3  | protein serinethreonine kinase                                                                                     | CDK7           |
| 211340_s_at | -1   | -1.5 | MUC18 glycoprotein                                                                                                 | MCAM           |
| 211454_x_at | -1.6 | -1.3 | Homo sapiens FKSG51 (FKSG51) mRNA, complete cds.                                                                   | FKSG51         |
| 211466_at   | -1.2 | -1.1 | nuclear factor I B3                                                                                                | NFIB           |
| 211600_at   | -2.3 | -1.5 | glomerular epithelial protein 1                                                                                    | GLEPP1         |
| 211701_s_at | -1.3 | -1.3 | magphinin beta                                                                                                     | TRO            |
| 211968_s_at | 1.6  | 2.2  | heat shock 90kD protein 1, alpha                                                                                   | HSPCA          |
| 211980_at   | -1.9 | -1.2 | collagen, type IV, alpha 1                                                                                         | COL4A1         |
| 212007_at   | 1    | 2.4  | UBX domain-containing 1                                                                                            | UBXDC1         |
| 212012_at   | -2.1 | -1.9 | Melanoma associated gene                                                                                           | D2S448         |
| 212190_at   | -1.8 | -2.5 | trinucleotide repeat containing 3                                                                                  | TNRC3          |
| 212230_at   | -1.6 | -1.3 | Homo sapiens phosphatidic acid phosphatase type 2B (PPAP2B), mRNA                                                  |                |
| 212233_at   | -1.6 | -1.3 | H.sapiens mRNA for 3UTR of unknown protein                                                                         |                |
| 212353_at   | -1.9 | -1.3 | KIAA1077 protein                                                                                                   | KIAA1077       |
| 212419_at   | -1   | -2   | Homo sapiens mRNA; cDNA DKFZp564L0822 (from clone DKFZp564L0822)                                                   |                |
| 212613_at   | 1.2  | 2.3  | butyrophilin, subfamily 3, member A2                                                                               | BTN3A2         |
| 212768_s_at | -4.5 | -2   | differentially expressed in hematopoietic lineages                                                                 | GW112          |
| 212865_s_at | -1.3 | -1.1 | collagen, type XIV, alpha 1 (undulin)                                                                              | COL14A1        |
| 212915_at   | -2   | -2.6 | KIAA1095 protein                                                                                                   | KIAA1095       |
| 212946_at   | -1.1 | -1.1 | KIAA0564 protein                                                                                                   | KIAA0564       |
| 213106_at   | -1.3 | -1.5 | Homo sapiens clone 23664 and 23905 mRNA sequence                                                                   |                |
| 213183_s_at | -1.5 | -2.1 | cyclin-dependent kinase inhibitor 1C (p57, Kip2)                                                                   | CDKN1C         |
| 213241_at   | -2.2 | -1.5 | Homo sapiens clone 23785 mRNA sequence                                                                             |                |
| 213260_at   | -1   | -1.7 | forkhead box C1                                                                                                    | FOXC1          |
| 213275_x_at | -1.4 | -1   | cathepsin B                                                                                                        | CTSB           |
| 213305_s_at | 1    | 3.8  | protein phosphatase 2A B56-gamma1                                                                                  | PP2A           |
| 213307_at   | -1.8 | -1.6 | cortactin SH3 domain-binding protein                                                                               | KIAA1022       |
| 213326_at   | -1.1 | -1.4 | vesicle-associated membrane protein 1 (synaptobrevin 1)                                                            | VAMP1          |
| 213413_at   | -1.4 | -1.6 | Homo sapiens cDNA FLJ13555 fis, clone PLACE1007677                                                                 |                |
| 213447_at   | -1   | -1   | imprinted in Prader-Willi syndrome                                                                                 | IPW            |
| 213486_at   | -1   | -1.6 | hypothetical protein DKFZp761N09121                                                                                | DKFZP761N09121 |
| 213496_at   | -1.9 | -1.3 | KIAA0455 gene product                                                                                              | KIAA0455       |
| 213622_at   | -1.5 | -1.6 | collagen, type IX, alpha 2                                                                                         | COL9A2         |
| 213649_at   | 1    | 1.6  | splicing factor, arginineserine-rich 7 (35kD)                                                                      | SFRS7          |
| 213729_at   | 1    | 1.1  | Huntingtin-interacting protein A                                                                                   | HYP A          |
| 213836_s_at | -1.1 | -2   | KIAA1001 protein                                                                                                   | KIAA1001       |
| 213880_at   | -1.6 | -2   | G protein-coupled receptor 49                                                                                      | GPR49          |
| 214041_x_at | -1.6 | -2.5 | ribosomal protein L37a                                                                                             | RPL37A         |
| 214414_x_at | -2.7 | -2.2 | hemoglobin, alpha 1                                                                                                | HBA1           |
| 214582_at   | -1.6 | -1.6 | 2,3-cyclic nucleotide 3 phosphodiesterase                                                                          | CNP            |
| 214610_at   | -1.1 | -1.3 | cytochrome P450, subfamily XIB (steroid 11-beta-hydroxylase), polypeptide 1                                        | CYP11B1        |
| 214710_s_at | 2.2  | 1.8  | cyclin B1                                                                                                          | CCNB1          |
| 214741_at   | 1.2  | 3.4  | zinc finger protein 131 (clone pHZ-10)                                                                             | ZNF131         |
| 214772_at   | -1.5 | -1.6 | G2 protein                                                                                                         | G2             |
| 214861_at   | -3.1 | -1.5 | gene amplified in squamous cell carcinoma 1; KIAA0780 protein                                                      | KIAA0780       |
| 215067_x_at | -1.4 | -1   | Homo sapiens cDNA FLJ12333 fis, clone MAMMA1002198, highly similar to THIOREDOXIN PEROXIDASE 1                     |                |
| 215204_at   | -1.4 | -1.1 | Homo sapiens cDNA FLJ14090 fis, clone MAMMA1000264                                                                 |                |
| 215306_at   | -1.7 | -2.3 | Homo sapiens mRNA; cDNA DKFZp586N2020 (from clone DKFZp586N2020).                                                  |                |
| 215424_s_at | 1.3  | 1.5  | SKI-INTERACTING PROTEIN                                                                                            | SNW1           |
| 215479_at   | -1.8 | -1.4 | Homo sapiens cDNA FLJ20780 fis, clone COL04256.                                                                    |                |
| 215704_at   | -2.4 | -2   | filaggrin                                                                                                          | FLG            |
| 216034_at   | -1.5 | -1.9 | Homo sapiens immunoglobulin lambda gene locus DNA, clone:288A10                                                    |                |
| 216061_x_at | -1   | -1.1 | platelet-derived growth factor beta polypeptide (simian sarcoma viral (v-sis) oncogene homolog)                    | PDGFB          |
| 216246_at   | -1   | -1.8 | ribosomal protein S20                                                                                              | RPS20          |
| 216341_s_at | -1.7 | -1.4 | gonadotropin-releasing hormone receptor                                                                            | GNRHR          |
| 216379_x_at | -1.8 | -1.6 | Homo sapiens cDNA FLJ20161 fis, clone COL09252, highly similar to L33930 Homo sapiens CD24 signal transducer mRNA. |                |
| 217897_at   | -1.4 | -1.6 | FXVD domain-containing ion transport regulator 6                                                                   | FXVD6          |
| 218123_at   | 1.4  | 1.5  | Homo sapiens chromosome 21 open reading frame 59 (C21ORF59), mRNA. / hypothetical protein FLJ20467                 | C21ORF59       |
| 218211_s_at | -1.7 | -1.6 | hypothetical protein MGC2771                                                                                       | MGC2771        |
| 218309_at   | -1.5 | -1.3 | hypothetical protein PRO1489                                                                                       | PRO1489        |
| 218349_s_at | 1.1  | 2.3  | hypothetical protein FLJ10036                                                                                      | FLJ10036       |
| 218502_s_at | -2   | -1.6 | trichorhinophalangeal syndrome I gene                                                                              | TRPS1          |
| 218542_at   | 2    | 2.2  | hypothetical protein FLJ10540                                                                                      | FLJ10540       |
| 218574_s_at | -1.3 | -2.7 | LIM and cysteine-rich domains 1                                                                                    | LMCD1          |
| 218622_at   | 1    | 1.6  | hypothetical protein MGC5585                                                                                       | MGC5585        |

|             |      |      |                                                                                 |               |
|-------------|------|------|---------------------------------------------------------------------------------|---------------|
| 218663_at   | 3.9  | 3.6  | chromosome condensation protein G                                               | HCAP-G        |
| 218751_s_at | 2.3  | 1.7  | hypothetical protein FLJ11071                                                   | FLJ11071      |
| 218974_at   | -2.2 | -1.4 | hypothetical protein FLJ10159                                                   | FLJ10159      |
| 219087_at   | 1.9  | 2.2  | asporin (LRR class 1)                                                           | ASPN          |
| 219148_at   | 1.7  | 1.1  | Homo sapiens PDZ-binding kinase; T-cell originated protein kinase (TOPK), mRNA. | TOPK          |
| 219212_at   | 1.1  | 1.1  | heat shock protein hsp70-related protein                                        | LOC51182      |
| 219304_s_at | -1.2 | -1.4 | spinal cord-derived growth factor-B                                             | SCDGF-B       |
| 219555_s_at | 1.8  | 3.5  | uncharacterized bone marrow protein BM039                                       | BM039         |
| 219572_at   | -1.7 | -1.4 | hypothetical protein FLJ20761                                                   | FLJ20761      |
| 219645_at   | -1.3 | -1.6 | skeletal muscle calsequestrin 1                                                 | CASQ1         |
| 219732_at   | -1   | -1.4 | hypothetical protein FLJ20300                                                   | FLJ20300      |
| 219787_s_at | 1    | 1.1  | hypothetical protein FLJ10461                                                   | FLJ10461      |
| 219795_at   | -1.1 | -2.1 | solute carrier family 6 (neurotransmittertransporter), member 14                | SLC6A14       |
| 219918_s_at | 1.4  | 1.3  | hypothetical protein FLJ10517                                                   | FLJ10517      |
| 219951_s_at | -1.1 | -1.2 | hypothetical protein FLJ10600                                                   | FLJ10600      |
| 219979_s_at | 1    | 2.1  | Homo sapiens hypothetical protein (HSPC138), mRNA.                              | HSPC138       |
| 220115_s_at | -1.7 | -1.2 | cadherin 10, type 2 (T2-cadherin)                                               | CDH10         |
| 220183_s_at | 2.4  | 3.7  | nudix (nucleoside diphosphate linked moietyX)-type motif 6                      | NUDT6         |
| 220193_at   | -3.6 | -1.3 | hypothetical protein FLJ22938                                                   | FLJ22938      |
| 220494_s_at | 1    | 3.6  | lipopolysaccharide specific response-68 protein                                 | LSR68         |
| 220533_at   | -1.3 | -1.4 | hypothetical protein FLJ13385                                                   | FLJ13385      |
| 220625_s_at | -1.5 | -2.1 | Ets transcription factor ESE-2b                                                 | ELF5          |
| 220867_s_at | -1.2 | -1   | solute carrier family 24(sodiumpotassiumcalcium exchanger), member 2            | SLC24A2       |
| 220897_at   | -1.1 | -1.5 | hypothetical protein FLJ11556                                                   | FLJ11556      |
| 221437_s_at | 1.3  | 2.6  | mitochondrial ribosomal protein S15                                             | MRPS15        |
| 221452_s_at | 1.1  | 1    | hypothetical protein MGC1223                                                    | MGC1223       |
| 221464_at   | -1.7 | -2   | olfactory receptor, family 1, subfamily D,member 2                              | OR1D2         |
| 221524_s_at | 1.1  | 1.2  | Rag D                                                                           | RAGD          |
| 221916_at   | -1.3 | -2   | hypothetical protein                                                            | DKFZp434B0417 |
| 221986_s_at | 1    | 2.5  | hypothetical protein FLJ20059                                                   | FLJ20059      |
| 222037_at   | 1.2  | 3.4  | minichromosome maintenance deficient (S. cerevisiae) 4                          | MCM4          |
| 222108_at   | -1   | -1.4 | Human BAC clone GS1-99H8                                                        |               |
| 222113_s_at | -1   | -1.3 | epidermal growth factor receptor substrate EPS15R                               | EPS15R        |
| 266_s_at    | -1.9 | -1.5 | Homo sapiens CD24 signal transducer mRNA, complete cds and 3' region            |               |
| 38241_at    | 1    | 3.2  | Human butyrophilin (BTF3) mRNA, complete cds                                    |               |
| 39891_at    | -1.1 | -1   |                                                                                 |               |
| 44702_at    | -1   | -1.3 |                                                                                 |               |
| 45749_at    | -1   | -1.3 |                                                                                 |               |
| 48031_r_at  | -1.5 | -1.7 |                                                                                 |               |
| 58780_s_at  | -1.2 | -1.6 |                                                                                 |               |
| 60471_at    | -1   | -1.1 |                                                                                 |               |

List of the genes that are differentially expressed in  $\alpha 6^{+}/\text{MHCI}^{+}$  cells and  $\alpha 6^{+}/\text{MHCI}^{-}$  cells and are consistently upregulated or downregulated  $\geq 2$  fold in both arrays. “-“sign indicates that the gene is upregulated in  $\alpha 6^{+}/\text{MHCI}^{-}$  cells. The numbers that show the difference in the level of gene expression are in log2 scale.
