# Supplementary material for: Transcriptional profiling of putative human epithelial stem cells
Source: PubMed Central journal article supplement (PMC2536675; doi:10.1186/1471-2164-9-359), 2008-07-30
Supplement: 1471-2164-9-359-S9.pdf [file 1471-2164-9-359-S9.pdf]

| Probe Set   | Exp. 1<br>Signal Log<br>Ratio | Exp. 2<br>Signal<br>Log<br>Ratio | Description                                                                                                  | Gene Symbol |
|-------------|-------------------------------|----------------------------------|--------------------------------------------------------------------------------------------------------------|-------------|
| 1053_at     | 1.3                           | 0.8                              | HUMA1SBU Human replication factor C, 40-kDa subunit (A1) mRNA, complete cds                                  |             |
| 200041_s_at | 1.7                           | 1                                | HLA-B associated transcript-1                                                                                | D6S81E      |
| 200072_s_at | 0.6                           | 1.3                              | M4 protein deletion mutant                                                                                   | HNRPM       |
| 200602_at   | -0.6                          | -1.2                             | amyloid beta (A4) precursor protein (proteasexin-II, Alzheimer disease)                                      | APP         |
| 200613_at   | 0.5                           | 1.3                              | adaptor-related protein complex 2, mu 1 subunit                                                              | AP2M1       |
| 200638_s_at | 0.3                           | 2.2                              | tyrosine 3-monooxygenasetryptophan5-monooxygenase activation protein, zeta polypeptide                       | YWHAZ       |
| 200644_at   | -1.8                          | -1                               | macrophage myristoylated alanine-rich C kinasesubstrate                                                      | MACMARCKS   |
| 200692_s_at | 1.3                           | 2.7                              | heat shock 70kD protein 9B (mortalin-2)                                                                      | HSPA9B      |
| 200728_at   | 0.7                           | 2                                | ARP2 (actin-related protein 2, yeast) homolog                                                                | ACTR2       |
| 200750_s_at | 0.9                           | 3.5                              | Homo sapiens GTP binding protein mRNA, complete cds.                                                         | RAN         |
| 200751_s_at | 0.9                           | 1.7                              | heterogeneous nuclear ribonucleoprotein C (C1C2)                                                             | HNRPC       |
| 200760_s_at | 0.9                           | 1.2                              | vitamin A responsive; cytoskeleton related                                                                   | JWA         |
| 200762_at   | -1.9                          | -1.9                             | dihydropyrimidinase-like 2                                                                                   | DPYSL2      |
| 200806_s_at | 1.8                           | 1.7                              | heat shock 60kD protein 1 (chaperonin)                                                                       | HSPD1       |
| 200814_at   | 0.4                           | 1                                | proteasome (prosome, macropain) activatorsubunit 1 (PA28 alpha)                                              | PSME1       |
| 200818_at   | 0.5                           | 1.2                              | ATP synthase, H+ transporting, mitochondrial F1complex, O subunit (oligomycin sensitivity conferringprotein) | ATP5O       |
| 200848_at   | 0.9                           | 1.2                              | S-adenosylhomocysteine hydrolase-like 1                                                                      | AHCYL1      |
| 200853_at   | 0.8                           | 1.3                              | H2A histone family, member Z                                                                                 | H2AFZ       |
| 200876_s_at | 0.5                           | 3.1                              | proteasome (prosome, macropain) subunit, betatype, 1                                                         | PSMB1       |
| 200878_at   | 1.2                           | 0.5                              | endothelial PAS domain protein 1                                                                             | EPAS1       |
| 200883_at   | 1.4                           | 1                                | ubiquinol-cytochrome c reductase core protein II                                                             | UQCRC2      |
| 200900_s_at | 2.8                           | 1.4                              | mannose-6-phosphate receptor (cation dependent)                                                              | M6PR        |
| 200904_at   | 0.6                           | 1.6                              | HLA-E                                                                                                        | HLA-E       |
| 200920_s_at | 0.6                           | 3.5                              | B-cell translocation gene 1, anti-proliferative                                                              | BTG1        |
| 200978_at   | 0.8                           | 1.8                              | malate dehydrogenase 1, NAD (soluble)                                                                        | MDH1        |
| 200993_at   | 1                             | 1.2                              | RAN binding protein 7                                                                                        | RANBP7      |
| 200996_at   | 0.5                           | 1.8                              | ARP3 (actin-related protein 3, yeast) homolog                                                                | ACTR3       |
| 201001_s_at | 1.2                           | 0.2                              | ubiquitin-conjugating enzyme E2 variant 1                                                                    | UBE2V1      |
| 201014_s_at | 1.4                           | 2                                | multifunctional polypeptide similar to SAICARSynthetase and AIR carboxylase                                  | ADE2H1      |
| 201027_s_at | 1.3                           | 0.5                              | translation initiation factor IF2                                                                            | IF2         |
| 201030_x_at | 0.6                           | 1                                | lactate dehydrogenase B                                                                                      | LDHB        |
| 201067_at   | 1                             | 0.3                              | proteasome (prosome, macropain) 26S subunit, ATPase, 2                                                       | PSMC2       |
| 201068_s_at | 1                             | 1                                | proteasome (prosome, macropain) 26S subunit, ATPase, 2                                                       | PSMC2       |
| 201110_s_at | -2.3                          | -1.9                             | thrombospondin 1                                                                                             | THBS1       |
| 201112_s_at | 1.1                           | 2.1                              | chromosome segregation 1 (yeast homolog)-like                                                                | CSE1L       |
| 201117_s_at | -1.9                          | -1.3                             | carboxypeptidase E precursor                                                                                 | CPE         |
| 201144_s_at | 1                             | 0.8                              | eukaryotic translation initiation factor 2,subunit 1 (alpha, 35kD )                                          | EIF2S1      |
| 201163_s_at | -2.2                          | -1.6                             | insulin-like growth factor binding protein 7                                                                 | IGFBP7      |
| 201176_s_at | 0.6                           | 2.5                              | archain                                                                                                      | ARCN1       |
| 201198_s_at | 1.2                           | 1                                | proteasome (prosome, macropain) 26S subunit, non-ATPase, 1                                                   | PSMD1       |
| 201214_s_at | 0.6                           | 1.4                              | protein phosphatase 1, regulatory subunit 7                                                                  | PPP1R7      |
| 201258_at   | 0.6                           | 2.4                              | ribosomal protein S16                                                                                        | RPS16       |
| 201263_at   | 0.4                           | 1                                | threonyl-tRNA synthetase                                                                                     | TARS        |
| 201291_s_at | 4.5                           | 2.1                              | topoisomerase (DNA) II alpha (170kD)                                                                         | TOP2A       |
| 201292_at   | 2                             | 2.1                              | topoisomerase (DNA) II alpha (170kD)                                                                         | TOP2A       |
| 201322_at   | 0.3                           | 1                                | ATP synthase, H+ transporting, mitochondrial F1complex, beta polypeptide                                     | ATP5B       |
| 201325_s_at | 0.4                           | 2.1                              | epithelial membrane protein 1                                                                                | EMP1        |
| 201358_s_at | -0.6                          | -1.2                             | coatomer protein complex, subunit beta                                                                       | COPB        |
| 201416_at   | -0.9                          | -1.2                             | SRY (sex determining region Y)-box 4                                                                         | SOX4        |
| 201454_s_at | 0.3                           | 1.4                              | aminopeptidase puromycin sensitive                                                                           | NPEPPS      |
| 201457_x_at | 0.5                           | 1.3                              | kinetochore protein BUB3                                                                                     | BUB3        |
| 201462_at   | 0.5                           | 1.7                              | KIAA0193 gene product                                                                                        | KIAA0193    |
| 201477_s_at | 1                             | 0.3                              | ribonucleotide reductase M1 polypeptide                                                                      | RRM1        |
| 201506_at   | 1.2                           | 1.3                              | transforming growth factor, beta-induced, 68kD                                                               | TGFBI       |
| 201532_at   | 0.8                           | 1.8                              | proteasome (prosome, macropain) subunit, alphantype, 3                                                       | PSMA3       |
| 201552_at   | 0.3                           | 1.9                              | lysosomal-associated membrane protein 1                                                                      | LAMP1       |
| 201577_at   | 1.2                           | 1.2                              | non-metastatic cells 1 protein                                                                               | NME1        |
| 201593_s_at | 0.8                           | 1.4                              | uncharacterized hypothalamus protein HT010                                                                   | HT010       |
| 201606_s_at | 1.3                           | 0.7                              | nuclear phosphoprotein similar to S. cerevisiae PWP1                                                         | PWP1        |
| 201659_s_at | 0.9                           | 1.1                              | ADP-ribosylation factor-like 1                                                                               | ARL1        |
| 201663_s_at | 1.4                           | 0.2                              | chromosome-associated polypeptide C                                                                          | CAP-C       |
| 201694_s_at | -0.8                          | -1.3                             | early growth response 1                                                                                      | EGR1        |
| 201725_at   | 1.4                           | 1.1                              | D123 gene product                                                                                            | D123        |

|             |      |      |                                                                                                |               |
|-------------|------|------|------------------------------------------------------------------------------------------------|---------------|
| 201779_s_at | 0.8  | 1.2  | RING zinc finger protein RZF                                                                   | RNF13         |
| 201811_x_at | -1   | -1.2 | SH3-domain binding protein 5 (BTK-associated)                                                  | SH3BP5        |
| 201831_s_at | 3.1  | 4.4  | vesicle docking protein p115                                                                   | P115          |
| 201859_at   | -1.6 | -1.1 | proteoglycan 1, secretory granule                                                              | PRG1          |
| 201890_at   | 1.1  | 0.7  | ribonucleotide reductase M2 polypeptide                                                        | RRM2          |
| 201897_s_at | 1.1  | 1.6  | CDC28 protein kinase 1                                                                         | CKS1          |
| 201927_s_at | 0.5  | 4.2  | plakophilin 4                                                                                  | PKP4          |
| 201931_at   | 0.8  | 1.9  | electron transfer flavoprotein, alphapolypeptide                                               | ETFPA         |
| 201946_s_at | 1.2  | 2.6  | chaperonin containing TCP1, subunit 2 (beta)                                                   | CCT2          |
| 201970_s_at | 1.7  | 2.9  | nuclear autoantigenic sperm protein(histone-binding)                                           | NASP          |
| 201975_at   | -0.7 | -1   | restin (Reed-Steinberg cell-expressedintermediate filament-associated protein)                 | RSN           |
| 202028_s_at | -0.6 | -1.4 | ribosomal protein L38                                                                          | RPL38         |
| 202113_s_at | 0.9  | 3.1  | sorting nexin 2                                                                                | SNX2          |
| 202149_at   | -0.7 | -1.2 | enhancer of filamentation 1 (cas-like docking; Crk-associated substrate related)               | HEF1          |
| 202157_s_at | -1   | -1.2 | RNA-binding protein BRUNOL3                                                                    | BRUNOL3       |
| 202202_s_at | -0.9 | -1.4 | laminin, alpha 4 precursor                                                                     | LAMA4         |
| 202206_s_at | 0.5  | 1.6  | ADP-ribosylation factor-like 7                                                                 | ARL7          |
| 202209_at   | 1.1  | 0.8  | Lsm3 protein                                                                                   | LSM3          |
| 202243_s_at | 0.8  | 2.4  | proteasome (prosome, macropain) subunit, betatype, 4                                           | PSMB4         |
| 202300_at   | 0.5  | 1.9  | hepatitis B virus x-interacting protein                                                        | XIP           |
| 202378_s_at | 0.9  | 1.7  | leptin receptor gene-related protein                                                           | HSOBRGRP      |
| 202403_s_at | -1.3 | -2   | collagen, type I, alpha 2                                                                      | COL1A2        |
| 202436_s_at | -2.2 | -1.2 | cytochrome P450, subfamily I (dioxin-inducible), polypeptide 1 (glaucoma 3, primary infantile) | CYP1B1        |
| 202437_s_at | -3.5 | -2.7 | cytochrome P450, subfamily I (dioxin-inducible),polypeptide 1                                  | CYP1B1        |
| 202487_s_at | 1    | 0.7  | purine-rich element binding protein B                                                          | PURB          |
| 202499_s_at | -0.8 | -1   | solute carrier family 2 (facilitated glucosetransporter), member 3                             | SLC2A3        |
| 202546_at   | 1    | 3.2  | vesicle-associated membrane protein 8                                                          | VAMP8         |
| 202552_s_at | -0.8 | -1.3 | cysteine-rich motor neuron 1                                                                   | CRIM1         |
| 202554_s_at | 0.6  | 1.3  | glutathione S-transferase M3 (brain)                                                           | GSTM3         |
| 202572_s_at | -1.1 | -1.2 | KIAA0964 protein                                                                               | KIAA0964      |
| 202589_at   | 1    | 0.4  | thymidylate synthetase                                                                         | TYMS          |
| 202591_s_at | 0.6  | 1.2  | single-stranded DNA-binding protein                                                            | SSBP          |
| 202596_at   | 1    | 0.2  | endosulfine alpha                                                                              | ENSA          |
| 202686_s_at | -0.8 | -1.6 | AXL receptor tyrosine kinase isoform 1precursor                                                | AXL           |
| 202687_s_at | 0.6  | 1    | Apo-2 ligand                                                                                   | TNFSF10       |
| 202688_at   | 0.4  | 2.7  | TNFSF10                                                                                        | TNFSF10       |
| 202705_at   | 1.7  | 0.6  | cyclin B2                                                                                      | CCNB2         |
| 202712_s_at | 1    | 0.8  | ubiquitous mitochondrial creatine kinaseprecursor                                              | CKMT1         |
| 202729_s_at | -0.8 | -1.1 | latent transforming growth factor beta bindingprotein 1 precursor                              | LTBP1         |
| 202746_at   | -1.2 | -0.8 | integral membrane protein 2A                                                                   | ITM2A         |
| 202753_at   | 0.5  | 1    | KIAA0107 gene product                                                                          | KIAA0107      |
| 202852_s_at | 0.4  | 1.4  | hypothetical protein FLJ11506                                                                  | FLJ11506      |
| 202899_s_at | 0.9  | 1.7  | splicing factor, arginineserine-rich 3                                                         | SFRS3         |
| 202908_at   | -1.1 | -1.2 | Wolfram syndrome protein                                                                       | WFS1          |
| 202936_s_at | -1.1 | -0.9 | transcription factor SOX9                                                                      | SOX9          |
| 202941_at   | 1    | 0.1  | NADH dehydrogenase (ubiquinone) flavoprotein 2(24kD)                                           | NDUFV2        |
| 203039_s_at | 1.1  | 0.3  | NADH dehydrogenase (ubiquinone) Fe-S protein 1(75kD) (NADH-coenzyme Q reductase)               | NDUFS1        |
| 203103_s_at | 1.1  | 1.6  | nuclear matrix protein NMP200 related tosplicing factor PRP19                                  | NMP200        |
| 203105_s_at | 1.4  | 0.5  | dynamin 1-like protein, isoform 1                                                              | DNM1L         |
| 203126_at   | 0.8  | 1.1  | inositol(myo)-1(or 4)-monophosphatase 2                                                        | IMPA2         |
| 203203_s_at | 1.1  | 1.4  | HIV-1 rev binding protein 2                                                                    | HRB2          |
| 203213_at   | 1.7  | 1.5  | cell division cycle 2, G1 to S and G2 to M                                                     | CDC2          |
| 203255_at   | -0.3 | -1.2 | vitiligo-associated protein VIT-1                                                              | VIT1          |
| 203345_s_at | 1.3  | 1.7  | putative DNA binding protein                                                                   | M96           |
| 203362_s_at | 1    | 0.8  | MAD2-like 1                                                                                    | MAD2L1        |
| 203428_s_at | 0.8  | 1.2  | CIA                                                                                            | DKFZP547E2110 |
| 203517_at   | 0.3  | 1    | metaxin 2                                                                                      | MTX2          |
| 203554_x_at | 1.1  | 1    | pituitary tumor-transforming protein 1                                                         | PTTG1         |
| 203560_at   | 0.8  | 1.2  | gamma-glutamyl hydrolase (conjugase,folylpolyglutamyl hydrolase) precursor                     | GGH           |
| 203603_s_at | -2.2 | -1.6 | zinc finger homeobox 1B                                                                        | ZFHX1B        |
| 203637_s_at | -0.4 | -1   | midline 1                                                                                      | MID1          |
| 203697_at   | -3.9 | -3.2 | Fritz                                                                                          | FRZB          |
| 203698_s_at | -2.8 | -2.7 | frizzled-related protein                                                                       | FRZB          |
| 203706_s_at | -1.1 | -1.5 | frizzled 7                                                                                     | FZD7          |
| 203711_s_at | 1.1  | 0.6  | 3-hydroxyisobutyryl-Coenzyme A hydrolase                                                       | HIBCH         |
| 203712_at   | 1.1  | 0.9  | KIAA0020 gene product                                                                          | KIAA0020      |
| 203755_at   | 1.6  | 0.5  | budding uninhibited by benzimidazoles 1 (yeasthomolog), beta                                   | BUB1B         |
| 203764_at   | 1.9  | 1.4  | KIAA0008 gene product                                                                          | KIAA0008      |

|             |      |      |                                                                                                                |                |
|-------------|------|------|----------------------------------------------------------------------------------------------------------------|----------------|
| 203798_s_at | 1.2  | 0.9  | visinin-like 1                                                                                                 | VSNL1          |
| 203856_at   | 1    | 0.4  | vaccinia related kinase 1                                                                                      | VRK1           |
| 203903_s_at | -1.2 | -1.8 | hephaestin                                                                                                     | HEPH           |
| 203962_s_at | 1    | 0.2  | nebulette                                                                                                      | NEBL           |
| 204026_s_at | 1.1  | 0.9  | ZW10 interactor                                                                                                | ZWINT          |
| 204135_at   | -0.9 | -1   | downregulated in ovarian cancer 1                                                                              | DOC1           |
| 204143_s_at | 0.4  | 1.1  | rTS beta protein                                                                                               | HSRTSBETA      |
| 204146_at   | 1.1  | 0.9  | RAD51-interacting protein                                                                                      | PIR51          |
| 204154_at   | -1.4 | -1.1 | cysteine dioxygenase, type I                                                                                   | CDO1           |
| 204162_at   | 2.9  | 1.9  | highly expressed in cancer, rich in leucineheptad repeats                                                      | HEC            |
| 204170_s_at | 1.1  | 0.7  | CDC28 protein kinase 2                                                                                         | CKS2           |
| 204197_s_at | -1.6 | -1.1 | runt-related transcription factor 3                                                                            | RUNX3          |
| 204237_at   | -1.2 | -1   | CED-6 protein                                                                                                  | CED-6          |
| 204271_s_at | -2   | -1.3 | endothelin receptor                                                                                            | ETs            |
| 204273_at   | -2.8 | -1.3 | endothelin receptor type B, isoform 1                                                                          | EDNRB          |
| 204279_at   | 1.4  | 0.4  | proteasome (prosome, macropain) subunit, betatype, 9 (large multifunctional protease 2)                        | PSMB9          |
| 204285_s_at | 0.7  | 1.3  | phorbol-12-myristate-13-acetate-induced protein 1                                                              | PMAIP1         |
| 204362_at   | 0.8  | 1.1  | SKAP55 homologue                                                                                               | SKAP-HOM       |
| 204364_s_at | 0.8  | 2.3  | hypothetical protein FLJ13110                                                                                  | FLJ13110       |
| 204400_at   | -0.6 | -1   | signal transduction protein (SH3 containing)                                                                   | EFS2           |
| 204409_s_at | 0.5  | 1.1  | Unknown (protein for MGC:12282)                                                                                | EIF1AY         |
| 204444_at   | 1.2  | 0.9  | kinesin-like 1                                                                                                 | KNLS1          |
| 204451_at   | -0.7 | -1.3 | frizzled 1                                                                                                     | FZD1           |
| 204464_s_at | -1.1 | -1.4 | endothelin receptor type A                                                                                     | EDNRA          |
| 204508_s_at | 0.7  | 2.2  | hypothetical protein FLJ20151                                                                                  | FLJ20151       |
| 204529_s_at | -1.8 | -2.2 | KIAA0808 gene product                                                                                          | KIAA0808       |
| 204531_s_at | 1    | 0.1  | breast cancer 1, early onset                                                                                   | BRCA1          |
| 204602_at   | -1.3 | -1.9 | dickkopf (Xenopus laevis) homolog 1                                                                            | DKK1           |
| 204620_s_at | -2   | -1.4 | chondroitin sulfate proteoglycan 2 (versican)                                                                  | CSPG2          |
| 204636_at   | 0.4  | 2.2  | collagen, type XVII, alpha 1                                                                                   | COL17A1        |
| 204682_at   | -0.9 | -1   | latent transforming growth factor beta bindingprotein 2                                                        | LTBP2          |
| 204712_at   | -6.6 | -3.8 | Wnt inhibitory factor-1                                                                                        | WIF-1          |
| 204725_s_at | 1    | 0.5  | NCK adaptor protein 1                                                                                          | NCK1           |
| 204766_s_at | 3.7  | 3.3  | nudix (nucleoside diphosphate linked moietyX)-type motif 1                                                     | NUDT1          |
| 204772_s_at | 1    | 0.3  | transcription termination factor, RNA polymerasel                                                              | TTF1           |
| 204777_s_at | -2   | -1.2 | T-cell differentiation protein MAL, isoform a                                                                  | MAL            |
| 204793_at   | -0.9 | -1.5 | KIAA0443 gene product                                                                                          | KIAA0443       |
| 204808_s_at | 0.6  | 1.4  | transmembrane protein 5                                                                                        | TMEM5          |
| 204822_at   | 1.1  | 1.1  | TTK protein kinase                                                                                             | TTK            |
| 204825_at   | 2    | 0.2  | KIAA0175 gene product                                                                                          | KIAA0175       |
| 204836_at   | -2   | -1.9 | glycine dehydrogenase (decarboxylating; glycinedecarboxylase, glycine cleavage system protein P)               | GLDC           |
| 204869_at   | -1.6 | -1.7 | proprotein convertase subtilisin/kexin type 2                                                                  | PCSK2          |
| 204872_at   | -0.7 | -1   | BCE-1 protein                                                                                                  | BCE-1          |
| 204948_s_at | -1.1 | -1.9 | folliculin isoform FST344 precursor                                                                            | FST            |
| 204962_s_at | 1.5  | 1.7  | centromere protein A                                                                                           | CENPA          |
| 205001_s_at | 1.3  | 1.6  | dead box, Y isoform                                                                                            | DBY            |
| 205053_at   | 0.9  | 1    | primase, polypeptide 1 (49kD)                                                                                  | PRIM1          |
| 205064_at   | -1.5 | -1.3 | small proline-rich protein 1B (cornifin)                                                                       | SPRR1B         |
| 205066_s_at | -1.6 | -2.1 | ectonucleotide pyrophosphatase/phosphodiesterase1                                                              | ENPP1          |
| 205170_at   | -1.5 | -1.4 | signal transducer and activator of transcription2, 113kD                                                       | STAT2          |
| 205194_at   | -0.9 | -1.1 | phosphoserine phosphatase                                                                                      | PSPH           |
| 205246_at   | 0.8  | 2.5  | peroxisome biogenesis factor 13                                                                                | PEX13          |
| 205328_at   | -1.5 | -0.7 | claudin 10                                                                                                     | CLDN10         |
| 205337_at   | -2.5 | -1.2 | dopachrome tautomerase (dopachrome delta-isomerase, tyrosine-related protein 2)                                | DCT            |
| 205345_at   | 1    | 2.5  | BRCA1 associated RING domain 1                                                                                 | BARD1          |
| 205372_at   | -0.6 | -1.3 | pleiomorphic adenoma gene 1                                                                                    | PLAG1          |
| 205383_s_at | -1.1 | -1.5 | zinc finger protein 288                                                                                        | ZNF288         |
| 205404_at   | -2.1 | -2.3 | hydroxysteroid (11-beta) dehydrogenase 1                                                                       | HSD11B1        |
| 205415_s_at | 0.3  | 1.6  | Machado-Joseph disease (spinocerebellar ataxia 3, olivopontocerebellar ataxia 3, autosomal dominant, ataxin 3) | MJD            |
| 205428_s_at | -0.6 | -1   | calbindin 2, full length protein isoform                                                                       | CALB2          |
| 205434_s_at | -0.8 | -1.6 | KIAA1048 protein                                                                                               | KIAA1048       |
| 205440_s_at | 1.2  | 0.6  | neuropeptide Y receptor Y1                                                                                     | NPY1R          |
| 205443_at   | 0.7  | 1.2  | small nuclear RNA activating complex, polypeptide 1, 43kD                                                      | SNAPC1         |
| 205480_s_at | 0.7  | 1.6  | UDP-glucose pyrophosphorylase 2                                                                                | UGP2           |
| 205489_at   | -1   | -1.5 | crystallin, mu                                                                                                 | CRYM           |
| 205590_at   | -1.3 | -2.6 | RAS guanyl releasing protein 1                                                                                 | RASGRP1        |
| 205659_at   | -1.6 | -2.5 | histone deacetylase 7B                                                                                         | HDAC7B-PENDING |
| 205694_at   | -2.3 | -1.5 | tyrosinase-related protein 1                                                                                   | TYRP1          |

|             |      |      |                                                                                                  |                |
|-------------|------|------|--------------------------------------------------------------------------------------------------|----------------|
| 205711_x_at | 0.5  | 2.3  | ATP synthase, H+ transporting, mitochondrial F1complex, gamma polypeptide 1                      | ATP5C1         |
| 205752_s_at | -1   | -1.2 | glutathione S-transferase M5                                                                     | GSTM5          |
| 205794_s_at | -1.8 | -1.6 | neuro-oncological ventral antigen 1, isoform 1                                                   | NOVA1          |
| 205848_at   | -2.1 | -2.6 | growth arrest-specific 2                                                                         | GAS2           |
| 205891_at   | 0.5  | 1.5  | adenosine A2b receptor                                                                           | ADORA2B        |
| 205909_at   | 1.4  | 0.6  | polymerase (DNA directed), epsilon 2                                                             | POLE2          |
| 206002_at   | -2.1 | -2.3 | G protein-coupled receptor 64                                                                    | GPR64          |
| 206140_at   | -5   | -4.7 | LIM homeobox protein 2                                                                           | LHX2           |
| 206144_at   | -1.1 | -1   | BAI1-associated protein 1                                                                        | BAIAP1         |
| 206276_at   | 2    | 0.5  | lymphocyte antigen 6 complex, locus D                                                            | E48            |
| 206302_s_at | -0.5 | -1.1 | nudix (nucleoside diphosphate linked moietyX)-type motif 4                                       | NUDT4          |
| 206314_at   | -0.8 | -1.2 | zinc finger protein                                                                              | ZFP            |
| 206323_x_at | -1.2 | -1.2 | oligophrenin 1, Rho-GTPase activating protein                                                    | OPHN1          |
| 206364_at   | 1.3  | 0.5  | KIAA0042 gene product                                                                            | KIAA0042       |
| 206377_at   | -1.3 | -1.2 | forkhead box F2                                                                                  | FOXF2          |
| 206400_at   | 0.3  | 1.8  | galectin 7                                                                                       | LGALS7         |
| 206404_at   | -1   | -1.7 | fibroblast growth factor 9 (glia-activatingfactor)                                               | FGF9           |
| 206421_s_at | 1.8  | 4    | serine (or cysteine) proteinase inhibitor, cladeB (ovalbumin), member 7                          | SERPINB7       |
| 206426_at   | -1   | -1.5 | melan-A                                                                                          | MLANA          |
| 206465_at   | -2.3 | -3.5 | very long-chain acyl-CoA synthetase; lipidosin                                                   | KIAA0631       |
| 206542_s_at | 0.7  | 1    | SWISNF related, matrix associated, actin dependent regulator of chromatin, subfamily a, member 2 | SMARCA2        |
| 206562_s_at | 1.2  | 1.5  | casein kinase 1, alpha 1                                                                         | CSNK1A1        |
| 206642_at   | 0.7  | 1.4  | desmoglein 1 preproprotein                                                                       | DSG1           |
| 206734_at   | -0.9 | -1.1 | jerky (mouse) homolog-like                                                                       | JRKL           |
| 206766_at   | -1.1 | -1.4 | integrin alpha 10 subunit                                                                        | ITGA10         |
| 206953_s_at | -1   | -1.6 | latrophilin                                                                                      | KIAA0786       |
| 207016_s_at | -2.2 | -2   | RALDH2-T                                                                                         | RALDH2         |
| 207076_s_at | 0.6  | 1.6  | argininosuccinate synthetase                                                                     | ASS            |
| 207165_at   | 2.1  | 1.6  | hyaluronan-mediated motility receptor (RHAMM)                                                    | HMMR           |
| 207173_x_at | -1.8 | -2.4 | OB-cadherin-1                                                                                    | osf-4          |
| 207175_at   | -1.9 | -2.3 | adipose most abundant gene transcript 1                                                          | APM1           |
| 207184_at   | -1.1 | -1.5 | solute carrier family 6 (neurotransmittertransporter, GABA), member 13                           | SLC6A13        |
| 207291_at   | 1.1  | 0.8  | transmembrane gamma-carboxyglutamic acid protein 4                                               | TMG4           |
| 207345_at   | -2   | -2.3 | follistatin isoform FST317 precursor                                                             | FST            |
| 207369_at   | -1.4 | -1.8 | bombesin-like receptor 3                                                                         | BRS3           |
| 207573_x_at | 0.6  | 1    | ATP synthase, H+ transporting, mitochondrialF1F0, subunit g                                      | ATP5JG         |
| 207594_s_at | -1   | -1.7 | synaptojanin 1                                                                                   | SYNJ1          |
| 207981_s_at | -0.9 | -2.4 | estrogen-related receptor gamma                                                                  | ESRRG          |
| 208029_s_at | 0.3  | 1.4  | putative integral membrane transporter                                                           | LC27           |
| 208079_s_at | 2    | 0.3  | serinethreonine kinase 6                                                                         | STK6           |
| 208095_s_at | 1.8  | 1.2  | calciumcalmodulin-dependent protein kinase (CaMkinase) II gamma                                  | CAMK2G         |
| 208216_at   | -0.9 | -1.2 | distal-less homeobox 4                                                                           | DLX4           |
| 208309_s_at | 1    | 1.4  | mucosa associated lymphoid tissue lymphomatranslocation gene 1                                   | MALT1          |
| 208517_x_at | 0.7  | 1.3  | basic transcription factor 3                                                                     | BTF3           |
| 208606_s_at | 0.7  | 3.6  | wingless-type MMTV integration site family,member 4                                              | WNT4           |
| 208626_s_at | -0.7 | -1.1 | Similar to membrane protein of cholinergicsynaptic vesicles                                      | VATI           |
| 208636_at   | -0.7 | -1.1 | actinin, alpha 1                                                                                 | ACTN1          |
| 208650_s_at | -1.5 | -1.1 | CD24 antigen (small cell lung carcinoma cluster 4 antigen)                                       | CD24           |
| 208662_s_at | 1    | 1.4  | tetratricopeptide repeat domain 3                                                                | TTC3           |
| 208670_s_at | 0.8  | 1.4  | PNAS-26                                                                                          | CR11           |
| 208679_s_at | 0.4  | 2.2  | PNAS-139                                                                                         | ARPC2          |
| 208685_x_at | 0.2  | 1    | bromodomain-containing 2                                                                         | BRD2           |
| 208689_s_at | 0.5  | 1.9  | ribophorin II                                                                                    | RPN2           |
| 208695_s_at | -0.5 | -1.1 | ribosomal protein L39                                                                            | RPL39          |
| 208696_at   | 0.5  | 2.3  | PNAS-102                                                                                         | CCT5           |
| 208734_x_at | 0.8  | 2.6  | GTP-binding protein                                                                              | RAB2           |
| 208743_s_at | 0.8  | 4.8  | tyrosine 3-monooxygenasetryptophan5-monooxygenase activation protein, beta polypeptide           | YWHAB          |
| 208761_s_at | 0.3  | 2.5  | SUMO-1                                                                                           | UBL1           |
| 208805_at   | 0.9  | 1    | proteasome (prosome, macropain) subunit, alphasubtype 6                                          | PSMA6          |
| 208835_s_at | 1.1  | 0.9  | cisplatin resistance-associated overexpressed protein                                            | LUC7A          |
| 208851_s_at | -0.7 | -1   | hypothetical protein                                                                             | DKFZp761B15121 |
| 208864_s_at | 1    | 1    | thioredoxin                                                                                      | TXN            |
| 208909_at   | 0.9  | 1    | ubiquinol-cytochrome c reductase, Rieskeiron-sulfur polypeptide 1                                | UQCRCF51       |
| 208910_s_at | 0.8  | 4.1  | splicing factor                                                                                  | C1QBP          |
| 208940_at   | 0.5  | 1.2  | SELENOPHOSPHATE SYNTHETASE ; Human selenium donor protein                                        | SPS            |
| 208993_s_at | 1.7  | 0.3  | peptidyl-prolyl isomerase G (cyclophilin G)                                                      | PPIG           |
| 209009_at   | 0.6  | 1.1  | Similar to esterase 10                                                                           | ESD            |
| 209024_s_at | 1.2  | 1    | NS1-associated protein 1                                                                         | NSAP1          |

|             |      |      |                                                                                                                         |                |
|-------------|------|------|-------------------------------------------------------------------------------------------------------------------------|----------------|
| 209040_s_at | 1.5  | 3.4  | proteasome subunit LMP7                                                                                                 | LMP7           |
| 209043_at   | 0.5  | 1.2  | bifunctional ATP sulfurylaseadenosine5-phosphosulfate kinase                                                            | PAPSS1         |
| 209059_s_at | 0.2  | 1.6  | hMBF1alpha                                                                                                              | EDF1           |
| 209104_s_at | 0.7  | 1.5  | likely homolog of yeast Nhp2, component of theHACA snoRNP; hypothetical protein FLJ20479                                | NOLA2          |
| 209118_s_at | -0.8 | -1.1 | alpha-tubulin                                                                                                           | TUBA3          |
| 209140_x_at | 1    | 2    | major histocompatibility complex                                                                                        | HLA-B39        |
| 209161_at   | 0.9  | 2.4  | PRP4STKWD splicing factor                                                                                               | HPRP4P         |
| 209168_at   | -1.5 | -1.3 | glycoprotein M6B                                                                                                        | GPM6B          |
| 209170_s_at | -2.5 | -1.7 | glycoprotein M6B                                                                                                        | m6b1           |
| 209242_at   | -0.9 | -1.2 | paternally expressed 3                                                                                                  | PEG3           |
| 209288_s_at | -1.4 | -0.9 | hypothetical protein                                                                                                    | DKFZp434A0530  |
| 209301_at   | 1.2  | 0.9  | carbonic anhydrase II                                                                                                   | CA2            |
| 209330_s_at | 1.3  | 0.9  | heterogeneous nuclear ribonucleoprotein D (hnRNPd)                                                                      | HNRPD          |
| 209360_s_at | -2.3 | -1.4 | AML1b protein                                                                                                           | AML1           |
| 209382_at   | 0.4  | 1.6  | RNA polymerase III subunit                                                                                              | RPC62          |
| 209392_at   | -2   | -1.7 | autotaxin                                                                                                               | ENPP2          |
| 209393_s_at | 0.9  | 2.6  | cap-binding protein 4EHP                                                                                                | EIF4EL3        |
| 209409_at   | -1.1 | -1.8 | growth factor receptor-bound protein 10                                                                                 | KIAA0207       |
| 209421_at   | 0.7  | 1.3  | mutS (E. coli) homolog 2 (colon cancer, nonpolyposis type 1)                                                            | hMSH2          |
| 209435_s_at | -1.3 | -1   | Unknown (protein for MGC:3182)                                                                                          |                |
| 209459_s_at | -0.8 | -1.6 | NPD009                                                                                                                  | NPD009         |
| 209512_at   | 1.1  | 2.5  | Similar to RIKEN cDNA 2610207116 gene                                                                                   |                |
| 209579_s_at | 0.6  | 1    | methyl-CpG binding domain protein 4                                                                                     | MBD4           |
| 209583_s_at | -2.9 | -1.5 | brain my033 protein                                                                                                     | MOX2           |
| 209620_s_at | 1.9  | 0.5  | ABC transporter 7 protein                                                                                               | hABC7          |
| 209656_s_at | -1.1 | -2.4 | hypothetical protein                                                                                                    | DKFZp761J17121 |
| 209669_s_at | 0.8  | 1.3  | Similar to DKFZP564M2423 protein                                                                                        |                |
| 209699_x_at | 1    | 0.2  | dihydrodiol dehydrogenase                                                                                               | AKR1C2         |
| 209732_at   | 0.7  | 1.4  | Similar to C-type (calcium dependent,carbohydrate-recognition domain) lectin, superfamily member 2 (activation-induced) | CLECSF2        |
| 209771_x_at | -1.8 | -1.6 | CD24 antigen (small cell lung carcinoma cluster 4 antigen)                                                              | CD24           |
| 209773_s_at | 1.4  | 2.3  | ribonucleotide reductase M2 polypeptide                                                                                 | RRM2           |
| 209846_s_at | 1    | 2    | Similar to butyrophilin, subfamily 3, member A2                                                                         | BTN3A2         |
| 209849_s_at | 1.2  | 0.8  | Rad51C                                                                                                                  | RAD51C         |
| 209861_s_at | 1.2  | 2.2  | eIF-2-associated p67 homolog                                                                                            | MNPEP          |
| 210093_s_at | 0.3  | 1.4  | Mago homolog                                                                                                            | MAGOH          |
| 210095_s_at | 0.6  | 2    | Human growth hormone-dependent insulin-like growth factor-binding protein mRNA, complete cds.                           | IGFBP1         |
| 210105_s_at | -1.6 | -1.8 | FYN oncogene related to SRC, FGR, YES                                                                                   | FYN            |
| 210115_at   | 2.8  | 1.3  | ribosomal protein L39                                                                                                   |                |
| 210136_at   | 0.9  | 1.8  | myelin basic protein                                                                                                    | MBP            |
| 210147_at   | -2.4 | -2.6 | mono-ADP-ribosyltransferase                                                                                             | htMART         |
| 210162_s_at | -1.1 | -1.7 | NF-ATc                                                                                                                  | NFATC1         |
| 210178_x_at | 0.6  | 1.3  | TLS-associated protein TASR                                                                                             | TASR1          |
| 210247_at   | -1.3 | -1   | synapsin II                                                                                                             | SYN2           |
| 210365_at   | -1.8 | -1.5 | AML1a protein                                                                                                           | AML1           |
| 210374_x_at | -1   | -0.8 | prostaglandin E receptor EP3 subtype 4 isoform                                                                          | PTGER3         |
| 210426_x_at | 0.6  | 2.4  | RORalpha1                                                                                                               | RORA           |
| 210479_s_at | 0.6  | 2.5  | transcription factor                                                                                                    | RORA           |
| 210517_s_at | -1.1 | -1   | gravin                                                                                                                  | AKAP12         |
| 210544_s_at | 1.1  | 0.6  | aldehyde dehydrogenase 10 (fatty aldehydedehydrogenase)                                                                 | ALDH3A2        |
| 210567_s_at | 1.3  | 0.2  | Similar to S-phase kinase-associated protein 2 (p45)                                                                    | SKP2           |
| 210759_s_at | 1.2  | 1.1  | prosomal protein P30-33K                                                                                                | pros-30        |
| 210792_x_at | 2.4  | 0.6  | Siva-2                                                                                                                  | SIVA           |
| 210800_at   | -1.3 | -1.2 | Unknown (protein for MGC:12262)                                                                                         | TIMM8A         |
| 210830_s_at | 0.9  | 1.7  | paraoxonase                                                                                                             | PON2           |
| 210944_s_at | -0.9 | -1.4 | Similar to calpain 3, (p94)                                                                                             | CAPN3          |
| 210946_at   | -1   | -1.3 | type-2 phosphatidic acid phosphatase alpha-2                                                                            | PAP2-a2        |
| 211015_s_at | 0.7  | 1.4  | heat shock protein 70                                                                                                   | hsp70          |
| 211071_s_at | -1.3 | -1   | ALL1-fused gene from chromosome 1q                                                                                      |                |
| 211075_s_at | 1.1  | 1.8  | integrin associated protein                                                                                             |                |
| 211276_at   | -1.3 | -2.4 | brain my048 protein                                                                                                     |                |
| 211297_s_at | 1.5  | 2.3  | protein serinethreonine kinase                                                                                          | CDK7           |
| 211340_s_at | -1   | -1.5 | MUC18 glycoprotein                                                                                                      | MCAM           |
| 211368_s_at | 1.1  | 0.2  | Interleukin 1-beta converting enzyme isoformepsilon                                                                     | IL1BCE         |
| 211445_x_at | -1.1 | -0.9 | FKSG17                                                                                                                  | FKSG17         |
| 211454_x_at | -1.6 | -1.3 | FKSG51                                                                                                                  | FKSG51         |
| 211466_at   | -1.2 | -1.1 | nuclear factor I B3                                                                                                     | NFIB           |
| 211600_at   | -2.3 | -1.5 | glomerular epithelial protein 1                                                                                         | GLEPP1         |

|             |      |      |                                                                              |                |
|-------------|------|------|------------------------------------------------------------------------------|----------------|
| 211623_s_at | 0.5  | 1.2  | Human casein kinase II beta subunit mRNA, complete cds.                      | CSNK2B         |
| 211701_s_at | -1.3 | -1.3 | magphinin beta                                                               | TRO            |
| 211762_s_at | 1.1  | 0.7  | karyopherin alpha 2 (RAG cohort 1, importin alpha 1)                         |                |
| 211936_at   | 1.1  | 0.6  | endoplasmic reticulum lumenal Ca2+ binding protein grp78                     | HSPA5          |
| 211959_at   | -0.9 | -1.1 | Human insulin-like growth factor binding protein 5 (IGFBP5) mRNA             |                |
| 211968_s_at | 1.6  | 2.2  | heat shock 90kD protein 1, alpha                                             | HSPCA          |
| 211980_at   | -1.9 | -1.2 | collagen, type IV, alpha 1                                                   | COL4A1         |
| 211985_s_at | 1.1  | 0.8  | matrix Gla protein                                                           | MGP            |
| 212007_at   | 1    | 2.4  | UBX domain-containing 1                                                      | UBXDC1         |
| 212012_at   | -2.1 | -1.9 | Melanoma associated gene                                                     | D2S448         |
| 212038_s_at | 0.7  | 1.9  | voltage-dependent anion channel 1                                            | VDAC1          |
| 212052_s_at | -0.4 | -1.2 | KIAA0676 protein                                                             | KIAA0676       |
| 212096_s_at | 0.7  | 1.1  | KIAA1288 protein                                                             | KIAA1288       |
| 212190_at   | -1.8 | -2.5 | trinucleotide repeat containing 3                                            | TNRC3          |
| 212199_at   | 0.4  | 1.1  | Human putative ribosomal protein S1 mRNA                                     |                |
| 212230_at   | -1.6 | -1.3 | Homo sapiens phosphatidic acid phosphatase type 2B (PPAP2B), mRNA            |                |
| 212233_at   | -1.6 | -1.3 | H.sapiens mRNA for 3UTR of unknown protein                                   |                |
| 212266_s_at | 0.7  | 1.2  | splicing factor, arginineserine-rich 5                                       | SFRS5          |
| 212353_at   | -1.9 | -1.3 | KIAA1077 protein                                                             | KIAA1077       |
| 212397_at   | 0.3  | 1.1  | hypothetical protein                                                         | DKFZp43410812  |
| 212419_at   | -1   | -2   | Homo sapiens mRNA; cDNA DKFZp564L0822 (from clone DKFZp564L0822)             |                |
| 212425_at   | -0.8 | -1.2 | secretory carrier membrane protein 1                                         | SCAMP1         |
| 212442_s_at | 0.5  | 1.2  | Homo sapiens cDNA: FLJ21238 fis, clone COL01115                              |                |
| 212450_at   | -0.7 | -1   | KIAA0256 protein                                                             | KIAA0256       |
| 212473_s_at | -0.9 | -1.5 | Homo sapiens cDNA: FLJ22463 fis, clone HRC10126                              |                |
| 212544_at   | 0.6  | 1.9  | thyroid hormone receptor interactor 3                                        | TRIP3          |
| 212613_at   | 1.2  | 2.3  | butyrophilin, subfamily 3, member A2                                         | BTN3A2         |
| 212626_x_at | 0.3  | 1.2  | heterogeneous nuclear ribonucleoprotein C (C1C2)                             | HNRPC          |
| 212749_s_at | 0.6  | 1.5  | DKFZP586C1620 protein                                                        | DKFZP586C1620  |
| 212761_at   | -0.6 | -1.2 | transcription factor 7-like 2 (T-cell specific, HMG-box)                     | TCF7L2         |
| 212768_s_at | -4.5 | -2   | differentially expressed in hematopoietic lineages                           | GW112          |
| 212865_s_at | -1.3 | -1.1 | collagen, type XIV, alpha 1 (undulin)                                        | COL14A1        |
| 212915_at   | -2   | -2.6 | KIAA1095 protein                                                             | KIAA1095       |
| 212916_at   | -0.4 | -1.1 | KIAA1111 protein                                                             | KIAA1111       |
| 212946_at   | -1.1 | -1.1 | KIAA0564 protein                                                             | KIAA0564       |
| 212977_at   | 0.9  | 1.1  | G protein-coupled receptor                                                   | RDC1           |
| 212980_at   | -0.5 | -1.7 | Homo sapiens mRNA; cDNA DKFZp586J101 (from clone DKFZp586J101).              |                |
| 213026_at   | 0.8  | 1.4  | Apg12 (autophagy 12, S. cerevisiae)-like                                     | APG12L         |
| 213106_at   | -1.3 | -1.5 | Homo sapiens clone 23664 and 23905 mRNA sequence                             |                |
| 213169_at   | -0.9 | -1.3 | Homo sapiens clone TUA8 Cri-du-chat region mRNA                              |                |
| 213183_s_at | -1.5 | -2.1 | cyclin-dependent kinase inhibitor 1C (p57, Kip2)                             | CDKN1C         |
| 213212_x_at | -0.9 | -1.3 | golgin-67                                                                    | KIAA0855       |
| 213241_at   | -2.2 | -1.5 | Homo sapiens clone 23785 mRNA sequence.                                      |                |
| 213260_at   | -1   | -1.7 | forkhead box C1                                                              | FOXC1          |
| 213266_at   | -0.5 | -1.3 | gamma tubulin ring complex protein (76p gene)                                | 76P            |
| 213275_x_at | -1.4 | -1   | cathepsin B                                                                  | CTSB           |
| 213305_s_at | 1    | 3.8  | protein phosphatase 2A B56-gamma1                                            | PP2A           |
| 213307_at   | -1.8 | -1.6 | cortactin SH3 domain-binding protein                                         | KIAA1022       |
| 213326_at   | -1.1 | -1.4 | vesicle-associated membrane protein 1 (synaptobrevin 1)                      | VAMP1          |
| 213350_at   | -0.7 | -1.8 | ribosomal protein S11                                                        | RPS11          |
| 213366_x_at | 0.4  | 1.5  | ATP synthase, H+ transporting, mitochondrial F1 complex, gamma polypeptide 1 | ATP5C1         |
| 213379_at   | 1.1  | 0.2  | Homo sapiens clone 640 unknown mRNA, complete sequence.                      | CL640          |
| 213413_at   | -1.4 | -1.6 | Homo sapiens cDNA FLJ13555 fis, clone PLACE1007677                           |                |
| 213428_s_at | -0.7 | -1.1 | collagen, type VI, alpha 1                                                   | COL6A1         |
| 213447_at   | -1   | -1   | imprinted in Prader-Willi syndrome                                           | IPW            |
| 213465_s_at | 0.9  | 1.1  | protein phosphatase 1, regulatory subunit 7                                  | PPP1R7         |
| 213476_x_at | 0.3  | 3.2  | tubulin, beta, 4                                                             | TUBB4          |
| 213486_at   | -1   | -1.6 | hypothetical protein DKFZp761N09121                                          | DKFZp761N09121 |
| 213496_at   | -1.9 | -1.3 | KIAA0455 gene product                                                        | KIAA0455       |
| 213588_x_at | -0.4 | -1   | ribosomal protein L14                                                        | RPL14          |
| 213622_at   | -1.5 | -1.6 | collagen, type IX, alpha 2                                                   | COL9A2         |
| 213649_at   | 1    | 1.6  | splicing factor, arginineserine-rich 7 (35kD)                                | SFRS7          |
| 213653_at   | 1.2  | 0.8  | putative methyltransferase                                                   | M6A            |
| 213729_at   | 1    | 1.1  | Huntingtin-interacting protein A                                             | HYP A          |
| 213803_at   | 0.9  | 1.2  | karyopherin (importin) beta 1                                                | KPNB1          |
| 213836_s_at | -1.1 | -2   | KIAA1001 protein                                                             | KIAA1001       |
| 213880_at   | -1.6 | -2   | G protein-coupled receptor 49                                                | GPR49          |
| 213900_at   | -0.8 | -1.1 | Friedreich ataxia region gene X123                                           | X123           |
| 214001_x_at | -0.9 | -1.9 | ribosomal protein S10                                                        | RPS10          |
| 214041_x_at | -1.6 | -2.5 | ribosomal protein L37a                                                       | RPL37A         |

|             |      |      |                                                                                                                    |               |
|-------------|------|------|--------------------------------------------------------------------------------------------------------------------|---------------|
| 214045_at   | 0.8  | 1.1  | lipic acid synthetase                                                                                              | LAS           |
| 214152_at   | -0.6 | -1.2 | phosphatidylinositol glycan, class B                                                                               | PIGB          |
| 214414_x_at | -2.7 | -2.2 | hemoglobin, alpha 1                                                                                                | HBA1          |
| 214459_x_at | 0.7  | 1.1  | Cw1 antigen                                                                                                        | HLA-C         |
| 214499_s_at | 0.5  | 1.7  | Bcl-2-associated transcription factor shortform                                                                    | KIAA0164      |
| 214582_at   | -1.6 | -1.6 | 2,3-cyclic nucleotide 3 phosphodiesterase                                                                          | CNP           |
| 214610_at   | -1.1 | -1.3 | cytochrome P450, subfamily XIB (steroid 11-beta-hydroxylase), polypeptide 1                                        | CYP11B1       |
| 214710_s_at | 2.2  | 1.8  | cyclin B1                                                                                                          | CCNB1         |
| 214734_at   | 0.5  | 1.5  | KIAA0624 protein                                                                                                   | KIAA0624      |
| 214741_at   | 1.2  | 3.4  | zinc finger protein 131 (clone pHZ-10)                                                                             | ZNF131        |
| 214772_at   | -1.5 | -1.6 | G2 protein                                                                                                         | G2            |
| 214798_at   | -0.9 | -1.3 | Homo sapiens cDNA: FLJ21771 fis, clone COLF7779                                                                    |               |
| 214861_at   | -3.1 | -1.5 | gene amplified in squamous cell carcinoma 1; KIAA0780 protein                                                      | KIAA0780      |
| 214866_at   | -0.9 | -1.3 | urokinase plasminogen activator receptor                                                                           | PLAUR         |
| 214911_s_at | 0.6  | 1.3  | bromodomain-containing 2                                                                                           | BRD2          |
| 214949_at   | 0.4  | 1.1  | Homo sapiens mRNA; cDNA DKFZp586L141 (from clone DKFZp586L141).                                                    |               |
| 214951_at   | -0.2 | -2.5 | hypothetical protein                                                                                               | DKFZp564M1916 |
| 215067_x_at | -1.4 | -1   | Homo sapiens cDNA FLJ12333 fis, clone MAMMA1002198, highly similar to THIOREDOXIN PEROXIDASE 1                     |               |
| 215148_s_at | -1.3 | -0.9 | amyloid beta (A4) precursor protein-binding, family A, member 3 (X11-like 2)                                       | APBA3         |
| 215204_at   | -1.4 | -1.1 | Homo sapiens cDNA FLJ14090 fis, clone MAMMA1000264                                                                 |               |
| 215306_at   | -1.7 | -2.3 | Homo sapiens mRNA; cDNA DKFZp586N2020 (from clone DKFZp586N2020).                                                  |               |
| 215424_s_at | 1.3  | 1.5  | SKI-INTERACTING PROTEIN                                                                                            | SNW1          |
| 215479_at   | -1.8 | -1.4 | Homo sapiens cDNA FLJ20780 fis, clone COL04256.                                                                    |               |
| 215516_at   | 0.7  | 2    | laminin, beta 4                                                                                                    | LAMB4         |
| 215525_at   | -0.5 | -1.8 | Homo sapiens mRNA; cDNA DKFZp586A0423 (from clone DKFZp586A0423).                                                  |               |
| 215695_s_at | -0.7 | -1.9 | glycogenin-2 delta                                                                                                 | glycogenin-2  |
| 215704_at   | -2.4 | -2   | filaggrin                                                                                                          | FLG           |
| 216034_at   | -1.5 | -1.9 | Homo sapiens immunoglobulin lambda gene locus DNA, clone:288A10                                                    |               |
| 216061_x_at | -1   | -1.1 | platelet-derived growth factor beta polypeptide (simian sarcoma viral (v-sis) oncogene homolog)                    | PDGFB         |
| 216088_s_at | 0.6  | 5.2  | proteasome (prosome, macropain) subunit, alpha type, 7                                                             | PSMA7         |
| 216246_at   | -1   | -1.8 | ribosomal protein S20                                                                                              | RPS20         |
| 216341_s_at | -1.7 | -1.4 | gonadotropin-releasing hormone receptor                                                                            | GNRHR         |
| 216379_x_at | -1.8 | -1.6 | Homo sapiens cDNA FLJ20161 fis, clone COL09252, highly similar to L33930 Homo sapiens CD24 signal transducer mRNA. |               |
| 216977_x_at | 0.9  | 1.1  | U2 snRNP-specific A protein                                                                                        | SNRPA1        |
| 216988_s_at | 0.6  | 1.4  | protein tyrosine phosphatase type IVA, member 2                                                                    | PTP4A2        |
| 217427_s_at | 1.6  | 0.4  | TUP1 like enhancer of SPLIT gene 1                                                                                 | TUPLE1        |
| 217717_s_at | 0.7  | 1.7  | GW128 protein                                                                                                      | GW128         |
| 217722_s_at | 0.6  | 1.2  | mesenchymal stem cell protein DSC92                                                                                | LOC51335      |
| 217747_s_at | 0.3  | 1    | ribosomal protein S9                                                                                               | RPS9          |
| 217764_s_at | 1    | 0.5  | small GTP-binding protein rab22b                                                                                   | RAB31         |
| 217772_s_at | 1.1  | 0.2  | mitochondrial carrier homolog 2                                                                                    | MTCH2         |
| 217835_x_at | 0.6  | 1    | putative Rab5-interacting protein                                                                                  | LOC55969      |
| 217871_s_at | 0.4  | 1.8  | macrophage migration inhibitory factor(glycosylation-inhibiting factor)                                            | MIF           |
| 217897_at   | -1.4 | -1.6 | FXVD domain-containing ion transport regulator 6                                                                   | FXVD6         |
| 217919_s_at | 1    | 0.2  | PTD007 protein                                                                                                     | PTD007        |
| 217933_s_at | 0.4  | 1.7  | leucine aminopeptidase                                                                                             | LOC51056      |
| 217955_at   | 0.7  | 1.5  | MIL1 protein                                                                                                       | MIL1          |
| 217959_s_at | 0.9  | 2.3  | PTD009 protein                                                                                                     | PTD009        |
| 217985_s_at | 0.8  | 2.1  | bromodomain adjacent to zinc finger domain, 1A                                                                     | BAZ1A         |
| 217991_x_at | -1.1 | -0.7 | hypothetical protein FLJ10355                                                                                      | FLJ10355      |
| 217995_at   | 0.7  | 1    | CGI-44 protein; sulfide dehydrogenase like(yeast)                                                                  | CGI-44        |
| 218009_s_at | 1.6  | 0.9  | protein regulator of cytokinesis 1                                                                                 | PRC1          |
| 218020_s_at | -0.6 | -1   | hypothetical protein FLJ13222                                                                                      | FLJ13222      |
| 218039_at   | 1.5  | 0.5  | clone HQ0310 PRO0310p1                                                                                             | LOC51203      |
| 218049_s_at | 0.6  | 1.5  | L13 protein                                                                                                        | L13           |
| 218108_at   | 0.5  | 1.1  | hypothetical protein FLJ10483                                                                                      | FLJ10483      |
| 218118_s_at | 1.6  | 0.9  | translocase of inner mitochondrial membrane 23(yeast) homolog                                                      | TIM23         |
| 218123_at   | 1.4  | 1.5  | hypothetical protein FLJ20467                                                                                      | C21ORF59      |
| 218167_at   | 0.6  | 2.1  | hypothetical protein                                                                                               | LOC51321      |
| 218211_s_at | -1.7 | -1.6 | hypothetical protein MGC2771                                                                                       | MGC2771       |
| 218229_s_at | 0.2  | 1.6  | KIAA1513 protein                                                                                                   | KIAA1513      |
| 218252_at   | 1    | 0.6  | cytoskeleton associated protein 2                                                                                  | CKAP2         |
| 218309_at   | -1.5 | -1.3 | hypothetical protein PRO1489                                                                                       | PRO1489       |
| 218330_s_at | -0.8 | -1.7 | hypothetical protein FLJ10633                                                                                      | FLJ10633      |
| 218349_s_at | 1.1  | 2.3  | hypothetical protein FLJ10036                                                                                      | FLJ10036      |
| 218449_at   | 0.7  | 1.2  | hypothetical protein FLJ11200                                                                                      | FLJ11200      |
| 218450_at   | 0.2  | 1.6  | heme-binding protein                                                                                               | HEBP          |

|             |      |      |                                                                                   |               |
|-------------|------|------|-----------------------------------------------------------------------------------|---------------|
| 218502_s_at | -2   | -1.6 | trichorhinophalangeal syndrome I gene                                             | TRPS1         |
| 218542_at   | 2    | 2.2  | hypothetical protein FLJ10540                                                     | FLJ10540      |
| 218557_at   | 0.9  | 1.6  | Nit protein 2                                                                     | NIT2          |
| 218558_s_at | 1    | 0.7  | hypothetical protein                                                              | PRED22        |
| 218574_s_at | -1.3 | -2.7 | LIM and cysteine-rich domains 1                                                   | LMCD1         |
| 218585_s_at | 1.5  | 0.9  | L2DTL protein                                                                     | L2DTL         |
| 218605_at   | 0.5  | 1.4  | hypothetical protein FLJ23182                                                     | FLJ23182      |
| 218622_at   | 1    | 1.6  | hypothetical protein MGC5585                                                      | MGC5585       |
| 218637_at   | -0.9 | -1.1 | hypothetical protein IMPACT                                                       | IMPACT        |
| 218662_s_at | 1.7  | 0.2  | chromosome condensation protein G                                                 | HCAP-G        |
| 218663_at   | 3.9  | 3.6  | chromosome condensation protein G                                                 | HCAP-G        |
| 218728_s_at | 0.9  | 1.3  | HSPC163 protein                                                                   | HSPC163       |
| 218751_s_at | 2.3  | 1.7  | hypothetical protein FLJ11071                                                     | FLJ11071      |
| 218771_at   | -0.8 | -1.1 | hypothetical protein FLJ10782                                                     | FLJ10782      |
| 218784_s_at | 0.7  | 2.5  | hypothetical protein FLJ11101                                                     | FLJ11101      |
| 218852_at   | 1    | 0.6  | hypothetical protein FLJ20644                                                     | FLJ20644      |
| 218859_s_at | 1    | 0.9  | HDCMC28P protein                                                                  | HDCMC28P      |
| 218883_s_at | 1.1  | 0.9  | hypothetical protein FLJ23468                                                     | FLJ23468      |
| 218947_s_at | 0.4  | 1.2  | hypothetical protein FLJ10486                                                     | FLJ10486      |
| 218974_at   | -2.2 | -1.4 | hypothetical protein FLJ10159                                                     | FLJ10159      |
| 219043_s_at | 0.4  | 1.8  | hypothetical protein MGC3062                                                      | MGC3062       |
| 219087_at   | 1.9  | 2.2  | asporin (LRR class 1)                                                             | ASPN          |
| 219104_at   | 1.1  | 0.2  | C3HC4-like zinc finger protein                                                    | ZFP26         |
| 219148_at   | 1.7  | 1.1  | PDZ-binding kinase                                                                | TOPK          |
| 219158_s_at | 0.3  | 1.2  | hypothetical protein FLJ13340                                                     | FLJ13340      |
| 219212_at   | 1.1  | 1.1  | heat shock protein hsp70-related protein                                          | LOC51182      |
| 219279_at   | 0.2  | 2.8  | hypothetical protein FLJ20220                                                     | FLJ20220      |
| 219304_s_at | -1.2 | -1.4 | spinal cord-derived growth factor-B                                               | SCDGF-B       |
| 219306_at   | 1.3  | 0.8  | kinesin-like protein 2                                                            | hklp2         |
| 219449_s_at | 0.3  | 1.7  | hypothetical protein FLJ20533                                                     | FLJ20533      |
| 219493_at   | 1.3  | 0.9  | hypothetical protein FLJ22009                                                     | FLJ22009      |
| 219496_at   | 0.8  | 1.1  | hypothetical protein FLJ21870                                                     | FLJ21870      |
| 219555_s_at | 1.8  | 3.5  | uncharacterized bone marrow protein BM039                                         | BM039         |
| 219572_at   | -1.7 | -1.4 | hypothetical protein FLJ20761                                                     | FLJ20761      |
| 219645_at   | -1.3 | -1.6 | skeletal muscle calsequestrin 1                                                   | CASQ1         |
| 219732_at   | -1   | -1.4 | hypothetical protein FLJ20300                                                     | FLJ20300      |
| 219757_s_at | -1   | -0.1 | hypothetical protein FLJ20392                                                     | FLJ20392      |
| 219759_at   | 1.2  | 0.6  | aminopeptidase                                                                    | LOC64167      |
| 219787_s_at | 1    | 1.1  | hypothetical protein FLJ10461                                                     | FLJ10461      |
| 219795_at   | -1.1 | -2.1 | solute carrier family 6 (neurotransmitter transporter), member 14                 | SLC6A14       |
| 219905_at   | 0.9  | 2.5  | hypothetical protein PRO2801                                                      | PRO2801       |
| 219918_s_at | 1.4  | 1.3  | hypothetical protein FLJ10517                                                     | FLJ10517      |
| 219932_at   | 0.5  | 1    | very long-chain acyl-CoA synthetase homolog 1                                     | VLCS-H1       |
| 219951_s_at | -1.1 | -1.2 | hypothetical protein FLJ10600                                                     | FLJ10600      |
| 219979_s_at | 1    | 2.1  | hypothetical protein                                                              | HSPC138       |
| 220115_s_at | -1.7 | -1.2 | cadherin 10, type 2 (T2-cadherin)                                                 | CDH10         |
| 220183_s_at | 2.4  | 3.7  | nudix (nucleoside diphosphate linked moietyX)-type motif 6                        | NUDT6         |
| 220193_at   | -3.6 | -1.3 | hypothetical protein FLJ22938                                                     | FLJ22938      |
| 220329_s_at | 1.1  | 0.5  | hypothetical protein FLJ20627                                                     | FLJ20627      |
| 220494_s_at | 1    | 3.6  | lipopolysaccharide specific response-68 protein                                   | LSR68         |
| 220533_at   | -1.3 | -1.4 | hypothetical protein FLJ13385                                                     | FLJ13385      |
| 220625_s_at | -1.5 | -2.1 | Ets transcription factor ESE-2b                                                   | ELF5          |
| 220867_s_at | -1.2 | -1   | solute carrier family 24(sodiumpotassiumcalcium exchanger), member 2              | SLC24A2       |
| 220897_at   | -1.1 | -1.5 | hypothetical protein FLJ11556                                                     | FLJ11556      |
| 220925_at   | 0.8  | 1.4  | hypothetical protein FLJ21613 similar to ratcorneal wound healing related protein | FLJ21613      |
| 221381_s_at | 0.2  | 1.1  | mortality factor 4                                                                | MORF4         |
| 221437_s_at | 1.3  | 2.6  | mitochondrial ribosomal protein S15                                               | MRPS15        |
| 221452_s_at | 1.1  | 1    | hypothetical protein MGC1223                                                      | MGC1223       |
| 221464_at   | -1.7 | -2   | olfactory receptor, family 1, subfamily D,member 2                                | OR1D2         |
| 221504_s_at | 0.9  | 1.3  | Vacuolar proton pump subunit SFD alpha isoform                                    | LOC51606      |
| 221524_s_at | 1.1  | 1.2  | Rag D                                                                             | RAGD          |
| 221580_s_at | 0.6  | 1    | Unknown (protein for MGC:5306)                                                    | MGC5306       |
| 221702_s_at | 0.3  | 1    | BBP-like protein 2                                                                | BLP2          |
| 221748_s_at | -0.6 | -1.3 | tensin                                                                            | TNS           |
| 221766_s_at | 1    | 0.2  | hypothetical protein FLJ20037                                                     | FLJ20037      |
| 221776_s_at | 1.4  | 0.8  | bromodomain-containing 7                                                          | BRD7          |
| 221829_s_at | 1    | 0.1  | karyopherin (importin) beta 2                                                     | KPNB2         |
| 221916_at   | -1.3 | -2   | hypothetical protein                                                              | DKFZp434B0417 |
| 221943_x_at | -0.8 | -1.6 | ribosomal protein L38                                                             | RPL38         |
| 221974_at   | -0.8 | -1   | imprinted in Prader-Willi syndrome                                                | IPW           |



|             |      |      |                                                                      |          |
|-------------|------|------|----------------------------------------------------------------------|----------|
| 221986_s_at | 1    | 2.5  | hypothetical protein FLJ20059                                        | FLJ20059 |
| 221989_at   | 0.5  | 1.1  | ribosomal protein L10                                                | RPL10    |
| 222037_at   | 1.2  | 3.4  | minichromosome maintenance deficient (S. cerevisiae) 4               | MCM4     |
| 222077_s_at | 1.1  | 0.6  | GTPase activating protein                                            | ID-GAP   |
| 222108_at   | -1   | -1.4 | Human BAC clone GS1-99H8                                             |          |
| 222113_s_at | -1   | -1.3 | epidermal growth factor receptor substrate EPS15R                    | EPS15R   |
| 266_s_at    | -1.9 | -1.5 | Homo sapiens CD24 signal transducer mRNA, complete cds and 3' region |          |
| 34031_i_at  | 0.6  | 1.6  | Human Krit1 mRNA, complete cds                                       | Krit1    |
| 36129_at    | -0.6 | -1.1 | Homo sapiens KIAA0397 mRNA, complete cds                             | KIAA0397 |
| 36552_at    | -0.6 | -1.3 |                                                                      |          |
| 36830_at    | 1.2  | 0.6  | Human mitochondrial intermediate peptidase precursor (MIPEP) mRNA,   | MIPEP    |
| 37547_at    | -0.9 | -2   |                                                                      |          |
| 38241_at    | 1    | 3.2  | Human butyrophilin (BTF3) mRNA, complete cds                         | BTF3     |
| 39891_at    | -1.1 | -1   |                                                                      |          |
| 40016_g_at  | -0.6 | -1.8 | Human mRNA for KIAA0303 gene, partial cds                            | KIAA0303 |
| 44702_at    | -1   | -1.3 |                                                                      |          |
| 44783_s_at  | -0.9 | -1.3 |                                                                      |          |
| 45749_at    | -1   | -1.3 |                                                                      |          |
| 47571_at    | -0.7 | -1.1 |                                                                      |          |
| 48031_r_at  | -1.5 | -1.7 |                                                                      |          |
| 48808_at    | 0.8  | 1.5  |                                                                      |          |
| 49327_at    | -0.9 | -1.1 |                                                                      |          |
| 49878_at    | -1.1 | -0.8 |                                                                      |          |
| 51158_at    | -0.9 | -1.2 |                                                                      |          |
| 54632_at    | -0.4 | -1   |                                                                      |          |
| 56256_at    | -0.5 | -1.5 |                                                                      |          |
| 57739_at    | -0.6 | -1.2 |                                                                      |          |
| 58780_s_at  | -1.2 | -1.6 |                                                                      |          |
| 58900_at    | -0.9 | -1   |                                                                      |          |
| 60471_at    | -1   | -1.1 |                                                                      |          |
| 60528_at    | -0.7 | -1.2 |                                                                      |          |
| 65635_at    | -0.5 | -1.1 |                                                                      |          |
| AFFX-       | -0.6 | -1.1 | Human Alu-Sq subfamily consensus sequence.                           | Alu-Sq   |
| hum_alu_at  |      |      |                                                                      |          |
| AFFX-       | -0.6 | -1.1 | Human 28S ribosomal RNA gene, complete cds.                          | 28S rRNA |
| M27830_M_at |      |      |                                                                      |          |

List of the genes that are differentially expressed in at least one array  $\geq 2$  fold in either  $\alpha 6^+/\text{MHCI}^+$  cells or  $\alpha 6^+/\text{MHCI}^-$  cells and are consistently upregulated or down regulated in both arrays. “-“sign indicates that the gene is upregulated in  $\alpha 6^+/\text{MHCI}^-$  cells. The numbers that show the difference in the level of gene expression are in log2 scale.
